# Supplementary material for: Global multi-host genomic epidemiology of a superbug reveals transmission at One Health interfaces
Source: Research Square preprint supplement (doi:10.21203/rs.3.rs-8226752/v1), 2025-12-04
Supplement: Supplementary file 1 [file 06fb4b6ef4c29352a2e2b06f.xlsx]

## Sheet: Metadata for 1,050 non-human ge
Classification proposed in this study					NCBI-sourced genomic data		Essential NCBI BioSample metadata fields
Assembly ID	General class	Intermediate class	Specific class	Metadata concatenation used to define categories	Bioproject	Biosample	Strain	Collection Date	Geographic Location
GCF_038442635.1	animal	companion_animal	cat	urine | F14-11 | cat | not applicable | UTI |	PRJNA224116	SAMN40971035	F14-11	2014	France
GCF_038442585.1	animal	companion_animal	cat	urine | F15-01A | cat | not applicable | UTI |	PRJNA224116	SAMN40971036	F15-01A	2015	France
GCF_038442575.1	animal	companion_animal	cat	urine | F15-01B | cat | not applicable | UTI |	PRJNA224116	SAMN40971037	F15-01B	2015	France
GCF_038442565.1	animal	companion_animal	cat	urine | F15-02 | cat | not applicable | UTI |	PRJNA224116	SAMN40971038	F15-02	2015	France
GCF_038442555.1	animal	companion_animal	cat	urine | F15-06 | cat | not applicable | UTI |	PRJNA224116	SAMN40971039	F15-06	2015	France
GCF_038442425.1	animal	companion_animal	cat	urine | F16-05 | cat | not applicable | UTI |	PRJNA224116	SAMN40971040	F16-05	2016	France
GCF_038442415.1	animal	companion_animal	cat	urine | F18-02 | cat | not applicable | UTI |	PRJNA224116	SAMN40971041	F18-02	2018	France
GCF_038442405.1	animal	companion_animal	cat	urine | F19-02 | cat | not applicable | UTI |	PRJNA224116	SAMN40971042	F19-02	2019	France
GCF_038442395.1	animal	companion_animal	cat	urine | F19-10-2 | cat | not applicable | UTI |	PRJNA224116	SAMN40971043	F19-10-2	2019	France
GCF_038442385.1	animal	companion_animal	cat	urine | F19-10-4 | cat | not applicable | UTI |	PRJNA224116	SAMN40971044	F19-10-4	2019	France
GCF_038442375.1	animal	companion_animal	cat	urine | F19-10-8 | cat | not applicable | UTI |	PRJNA224116	SAMN40971045	F19-10-8	2019	France
GCF_038442305.1	animal	companion_animal	cat	urine | F19-10-9 | cat | not applicable | UTI |	PRJNA224116	SAMN40971046	F19-10-9	2019	France
GCF_038442295.1	animal	companion_animal	cat	urine | F19-10-MH6 | cat | not applicable | UTI |	PRJNA224116	SAMN40971047	F19-10-MH6	2019	France
GCF_038442285.1	animal	companion_animal	cat	urine | F19-10-MH12 | cat | not applicable | UTI |	PRJNA224116	SAMN40971048	F19-10-MH12	2019	France
GCF_038442275.1	animal	companion_animal	cat	urine | F19-10-CH3 | cat | not applicable | UTI |	PRJNA224116	SAMN40971049	F19-10-CH3	2019	France
GCF_038442265.1	animal	companion_animal	cat	urine | F19-10-CH6 | cat | not applicable | UTI |	PRJNA224116	SAMN40971050	F19-10-CH6	2019	France
GCF_038442235.1	animal	companion_animal	cat	urine | F19-10-CH8 | cat | not applicable | UTI |	PRJNA224116	SAMN40971051	F19-10-CH8	2019	France
GCF_030678675.1	animal	companion_animal	cat	missing | Pathogen | cat |	PRJNA224116	SAMN36767699	10854_22	2022	Portugal
GCF_030377845.1	animal	companion_animal	cat	not determined | Microbe sample from Acinetobacter baumannii | cat | not applicable | bacterial sample |	PRJNA224116	SAMN28422562	48427	2017	France
GCF_030377815.1	animal	companion_animal	cat	body fluid | Microbe sample from Acinetobacter baumannii | cat | not applicable | bacterial sample |	PRJNA224116	SAMN28422558	53765	2018	France
GCF_030377785.1	animal	companion_animal	cat	urine | Microbe sample from Acinetobacter baumannii | cat | not applicable | bacterial sample |	PRJNA224116	SAMN28422560	26293	2010	France
GCF_030377705.1	animal	companion_animal	cat	urine | Microbe sample from Acinetobacter baumannii | cat | not applicable | bacterial sample |	PRJNA224116	SAMN28422565	43536	2016	France
GCF_030377665.1	animal	companion_animal	cat	urine | Microbe sample from Acinetobacter baumannii | cat | not applicable | bacterial sample |	PRJNA224116	SAMN28422569	53899	2019	France
GCF_030377575.1	animal	companion_animal	cat	pus | Microbe sample from Acinetobacter baumannii | cat | not applicable | bacterial sample |	PRJNA224116	SAMN28422574	53778	2019	France
GCF_030377375.1	animal	companion_animal	cat	urine | Microbe sample from Acinetobacter baumannii | cat | not applicable | bacterial sample |	PRJNA224116	SAMN28422583	40104	2015	France
GCF_030377365.1	animal	companion_animal	cat	urine | Microbe sample from Acinetobacter baumannii | cat | not applicable | bacterial sample |	PRJNA224116	SAMN28422581	34972	2013	France
GCF_030377345.1	animal	companion_animal	cat	urine | Microbe sample from Acinetobacter baumannii | cat | not applicable | bacterial sample |	PRJNA224116	SAMN28422582	38208	2014	France
GCF_030377315.1	animal	companion_animal	cat	urine | Microbe sample from Acinetobacter baumannii | cat | not applicable | bacterial sample |	PRJNA224116	SAMN28422584	41833	2015	France
GCF_030377305.1	animal	companion_animal	cat	urine | Microbe sample from Acinetobacter baumannii | cat | not applicable | bacterial sample |	PRJNA224116	SAMN28422585	43537	2016	France
GCF_030377205.1	animal	companion_animal	cat	urine | Microbe sample from Acinetobacter baumannii | cat | not applicable | bacterial sample |	PRJNA224116	SAMN28422590	41133	2015	France
GCF_030377175.1	animal	companion_animal	cat	urine | Microbe sample from Acinetobacter baumannii | cat | not applicable | bacterial sample |	PRJNA224116	SAMN28422594	48420	2017	France
GCF_030377105.1	animal	companion_animal	cat	urine | Microbe sample from Acinetobacter baumannii | cat | not applicable | bacterial sample |	PRJNA224116	SAMN28422593	48422	2017	France
GCF_030377085.1	animal	companion_animal	cat	respiratory sample | Microbe sample from Acinetobacter baumannii | cat | not applicable | bacterial sample |	PRJNA224116	SAMN28422592	44772	2016	France
GCF_018831465.1	animal	companion_animal	cat	Animal (cat) | Pathogen |	PRJNA224116	SAMN14149266	Ax270	2015	Lebanon
GCF_001657725.1	animal	companion_animal	cat	Microbe sample from Acinetobacter baumannii | cat | urine | urine |	PRJNA224116	SAMN04892866	IHIT7853	2000	Germany
GCA_024483005.1	animal	companion_animal	cat	Phlegmone | Sequencing of Acinetobacter baumannii | Cat |	PRJNA514245	SAMN29862335	GCA_024483005.1	2015	Germany
GCA_024481525.1	animal	companion_animal	cat	Swab throat | Pathogen | Cat |	PRJNA514245	SAMN29633483	GCA_024481525.1	2015	Germany
GCA_024481485.1	animal	companion_animal	cat	Central venous catheter | Pathogen | Cat |	PRJNA514245	SAMN29633504	GCA_024481485.1	2017	Germany
GCA_024481385.1	animal	companion_animal	cat	skin | Sequencing of Acinetobacter baumannii | Cat |	PRJNA514245	SAMN29862339	GCA_024481385.1	2017	Germany
GCA_024480805.1	animal	companion_animal	cat	urine | Pathogen | Cat |	PRJNA514245	SAMN29633494	GCA_024480805.1	2016	France
GCA_024480345.1	animal	companion_animal	cat	urine | Pathogen | Cat |	PRJNA514245	SAMN29633490	GCA_024480345.1	2015	France
GCA_024480285.1	animal	companion_animal	cat	Swab teats | Pathogen | Cat |	PRJNA514245	SAMN29633486	GCA_024480285.1	2015	France
GCA_024480265.1	animal	companion_animal	cat	urine | Pathogen | Cat |	PRJNA514245	SAMN29633479	GCA_024480265.1	2014	Germany
GCF_040698685.1	animal	companion_animal	dog	Wound swab | Dog | dog | not applicable |	PRJNA224116	SAMN42361434	PET1L	2023	India
GCF_038442225.1	animal	companion_animal	dog	urine | 40288-CIRI | dog | not applicable | Urinary Tract Infection |	PRJNA224116	SAMN40971052	40288-CIRI	2015	France
GCF_030377745.1	animal	companion_animal	dog	wound | Microbe sample from Acinetobacter baumannii | dog | not applicable | bacterial sample |	PRJNA224116	SAMN28422561	27027	2011	France
GCF_030377725.1	animal	companion_animal	dog	wound | Microbe sample from Acinetobacter baumannii | dog | not applicable | bacterial sample |	PRJNA224116	SAMN28422564	39518	2014	France
GCF_030377605.1	animal	companion_animal	dog	eye swab | Microbe sample from Acinetobacter baumannii | dog | not applicable | bacterial sample |	PRJNA224116	SAMN28422570	53895	2019	France
GCF_030377535.1	animal	companion_animal	dog	respiratory sample | Microbe sample from Acinetobacter baumannii | dog | not applicable | bacterial sample |	PRJNA224116	SAMN28422571	27024	2011	France
GCF_030377475.1	animal	companion_animal	dog	eye swab | Microbe sample from Acinetobacter baumannii | dog | not applicable | bacterial sample |	PRJNA224116	SAMN28422576	51877	2018	France
GCF_030377445.1	animal	companion_animal	dog	wound | Microbe sample from Acinetobacter baumannii | dog | not applicable | bacterial sample |	PRJNA224116	SAMN28422580	46738	2017	France
GCF_030377285.1	animal	companion_animal	dog	wound | Microbe sample from Acinetobacter baumannii | dog | not applicable | bacterial sample |	PRJNA224116	SAMN28422587	51874	2018	France
GCF_030377225.1	animal	companion_animal	dog	urine | Microbe sample from Acinetobacter baumannii | dog | not applicable | bacterial sample |	PRJNA224116	SAMN28422589	40293	2015	France
GCF_030377145.1	animal	companion_animal	dog	urine | Microbe sample from Acinetobacter baumannii | dog | not applicable | bacterial sample |	PRJNA224116	SAMN28422591	41134	2015	France
GCF_030377095.1	animal	companion_animal	dog	urine | Microbe sample from Acinetobacter baumannii | dog | not applicable | bacterial sample |	PRJNA224116	SAMN28422595	48187	2017	France
GCF_012974845.1	animal	companion_animal	dog	urine | Pathogen | Canis lupus familiaris | Urinary tract infection |	PRJNA224116	SAMN12057668	CUVET-MIC596	2017	Thailand
GCF_004153595.1	animal	companion_animal	dog	urine | Microbe sample from Acinetobacter baumannii | dog | urine sample |	PRJNA224116	SAMN10829634	IHIT38008	2018	Germany
GCF_001704705.1	animal	companion_animal	dog	Microbe sample from Acinetobacter baumannii | dog | tissue sample | skin | Pyodermie |	PRJNA224116	SAMN05292962	IHIT17966	2011	Germany
GCF_001704675.1	animal	companion_animal	dog	Microbe sample from Acinetobacter baumannii | dog | tissue sample | vagina |	PRJNA224116	SAMN05292947	IHIT17886	2011	Germany
GCA_028438605.1	animal	companion_animal	dog	Microbe sample from Acinetobacter baumannii | Canis lupus familiaris | cell culture |	PRJNA862736	SAMN29993283	IMT32503-Wdh_S3	2013	Germany
GCA_024542435.1	animal	companion_animal	dog	Punctate abdominal cavity | Pathogen | Dog |	PRJNA514245	SAMN29633484	GCA_024542435.1	2015	Germany
GCA_024482585.1	animal	companion_animal	dog	bronchoalveolar lavage | Sequencing of Acinetobacter baumannii | Dog |	PRJNA514245	SAMN29862338	GCA_024482585.1	2017	Germany
GCA_024481545.1	animal	companion_animal	dog	Central venous catheter | Pathogen | Dog |	PRJNA514245	SAMN29633510	GCA_024481545.1	2018	Germany
GCA_024481425.1	animal	companion_animal	dog	wound | Pathogen | Dog |	PRJNA514245	SAMN29633481	GCA_024481425.1	2015	Germany
GCA_024480825.1	animal	companion_animal	dog	ear | Pathogen | Dog |	PRJNA514245	SAMN29633485	GCA_024480825.1	2015	France
GCA_024480625.1	animal	companion_animal	dog	urine | Pathogen | Dog |	PRJNA514245	SAMN29633482	GCA_024480625.1	2015	France
GCA_024480325.1	animal	companion_animal	dog	Swab knee | Pathogen | Dog |	PRJNA514245	SAMN29633513	GCA_024480325.1	2018	Germany
GCA_024480305.1	animal	companion_animal	dog	bronchoalveolar lavage | Pathogen | Dog |	PRJNA514245	SAMN29633487	GCA_024480305.1	2015	France
GCA_024480245.1	animal	companion_animal	dog	urine | Pathogen | Dog |	PRJNA514245	SAMN29633489	GCA_024480245.1	2015	France
GCA_024480225.1	animal	companion_animal	dog	Central venous catheter | Sequencing of Acinetobacter baumannii | Dog |	PRJNA514245	SAMN29862336	GCA_024480225.1	2016	Germany
GCA_016496845.1	animal	companion_animal	dog	airway | 2.12E+11 | Canis lupus familiaris | 2.12E+11 |	PRJNA514245	SAMEA54068668	GCA_016496845.1	2012	Netherlands
GCA_016496805.1	animal	companion_animal	dog	urine | 2.12E+11 | Canis lupus familiaris | 2.12E+11 |	PRJNA514245	SAMEA54069418	GCA_016496805.1	2012	Netherlands
GCA_016496745.1	animal	companion_animal	dog	wound | 2.14E+11 | Canis lupus familiaris | 2.14E+11 |	PRJNA514245	SAMEA54070918	GCA_016496745.1	2012	Netherlands
GCA_016496705.1	animal	companion_animal	dog	surface | 2.14E+11 | Canis lupus familiaris | 2.14E+11 |	PRJNA514245	SAMEA54073168	GCA_016496705.1	2014	Netherlands
GCA_016496685.1	animal	companion_animal	dog	surface | UKG-Inl-T1-1N-1 | Canis lupus familiaris | UKG-Inl-T1-1N-1 |	PRJNA514245	SAMEA54073918	GCA_016496685.1	2014	Netherlands
GCA_016496645.1	animal	companion_animal	dog	surface | UKG-Inl-T1-4N-2 | Canis lupus familiaris | UKG-Inl-T1-4N-2 |	PRJNA514245	SAMEA54074668	GCA_016496645.1	2014	Netherlands
GCF_030377505.1	animal	companion_animal	ferret	respiratory sample | Microbe sample from Acinetobacter baumannii | ferret | not applicable | bacterial sample |	PRJNA224116	SAMN28422575	27603	2011	France
GCF_003056525.1	animal	companion_animal	pet_undefined	pets | ACB213 | cell culture |	PRJNA224116	SAMN08639652	pet_ACB213	2015	Italy
GCF_003056515.1	animal	companion_animal	pet_undefined	pets | ACB115 | cell culture |	PRJNA224116	SAMN08639651	pet_ACB115	2015	Italy
GCF_003056505.1	animal	companion_animal	pet_undefined	pets | ACB92 | cell culture |	PRJNA224116	SAMN08639649	pet_ACB92	2015	Italy
GCF_003056475.1	animal	companion_animal	pet_undefined	pets | ACB87 | cell culture |	PRJNA224116	SAMN08639648	pet_ACB87	2015	Italy
GCF_003056465.1	animal	companion_animal	pet_undefined	pets | ACB108 | cell culture |	PRJNA224116	SAMN08639650	pet_ACB108	2015	Italy
GCF_041801535.1	animal	farm_animal	chicken	Temperate monsoon climate | Pathogen | chickens | Endocarditis |	PRJNA224116	SAMN42799853	Y03	2021	China
GCF_034083075.1	animal	farm_animal	chicken	throat swab | Pathogen | chicken | Healthy animal |	PRJNA224116	SAMN38345664	HNNY86G	2022	China
GCF_034081005.1	animal	farm_animal	chicken	throat swab | Pathogen | chicken | Healthy animal |	PRJNA224116	SAMN38345631	HNZZ130D	2022	China
GCF_002573795.1	animal	farm_animal	chicken	Microbe sample from Acinetobacter baumannii | chicken | environmental sample |	PRJNA224116	SAMN07236641	GB1-2	2015	Germany
GCF_001693115.1	animal	farm_animal	chicken	Microbe sample from Acinetobacter baumannii | chicken | tissue sample | choana |	PRJNA224116	SAMN05257112	65	2012	Germany
GCA_028447315.1	animal	farm_animal	chicken	missing | Microbe sample from Acinetobacter baumannii | Gallus gallus | cell culture |	PRJNA862736	SAMN29992955	12-202_Marie	2012	Germany
GCA_028447285.1	animal	farm_animal	chicken	missing | Microbe sample from Acinetobacter baumannii | Gallus gallus | cell culture |	PRJNA862736	SAMN29992957	12-Marie315	2012	Germany
GCA_028446505.1	animal	farm_animal	chicken	missing | Microbe sample from Acinetobacter baumannii | Gallus gallus | cell culture |	PRJNA862736	SAMN29992956	12-62-Marie	2012	Germany
GCF_020271605.1	animal	farm_animal	chicken	a feces sample of chicken origin | Pathogen |	PRJNA224116	SAMN20477964	LHC22-2	2020	China
GCF_030168265.1	animal	farm_animal	cow	Acinetobacter baumannii 51248 from fecal swab | Bos taurus | livestock-associated habitat | feedlot | feces | Samples were collected by using foam-tipped swabs (VWR International, Buffalo Grove, IL) and swabbing an area (3 by 5 cm) inside the anal canal of each animal. Swabs were immediately placed into a 15-ml conical tube containing 4 ml of tryptic soy broth (TSB)‚Äö√Ñ√¨PO4 (TSB [Sigma, St. Lou…	PRJNA224116	SAMN27918892	51248	2013	USA
GCF_023499095.1	animal	farm_animal	cow	fecal sample | Pathogen | Bos taurus | not applicable |	PRJNA224116	SAMN27298896	CF233	2006	United Kingdom
GCF_004153295.1	animal	farm_animal	cow	manure | Microbe sample from Acinetobacter baumannii | Bos taurus | whole organism |	PRJNA224116	SAMN10784976	C1T1-1	2014	Canada
GCF_004152785.1	animal	farm_animal	cow	manure | Microbe sample from Acinetobacter baumannii | Bos taurus | whole organism |	PRJNA224116	SAMN10784979	C1T1-3	2014	Canada
GCF_004152715.1	animal	farm_animal	cow	manure | Microbe sample from Acinetobacter baumannii | Bos taurus | whole organism |	PRJNA224116	SAMN10784978	C1T1-2_b	2014	Canada
GCF_004152685.1	animal	farm_animal	cow	manure | Microbe sample from Acinetobacter baumannii | Bos taurus | whole organism |	PRJNA224116	SAMN10784980	C3T1-2	2014	Canada
GCF_035787775.1	animal	farm_animal	cow	milk | Microbe sample from Acinetobacter baumannii | Bos taurus indicus | Microbe Culture |	PRJNA224116	SAMN27533462	NC43	2019	India
GCF_023499155.1	animal	farm_animal	cow	fecal sample | Pathogen | Bos taurus | not applicable |	PRJNA224116	SAMN27298897	CF234	2006	United Kingdom
GCF_023499105.1	animal	farm_animal	cow	fecal sample | Pathogen | Bos taurus | not applicable |	PRJNA224116	SAMN27298899	CF254	2006	United Kingdom
GCF_023499085.1	animal	farm_animal	cow	fecal sample | Pathogen | Bos taurus | not applicable |	PRJNA224116	SAMN27298898	CF251	2006	United Kingdom
GCF_023499075.1	animal	farm_animal	cow	fecal sample | Pathogen | Bos taurus | not applicable |	PRJNA224116	SAMN27298900	CF258	2006	United Kingdom
GCF_023499055.1	animal	farm_animal	cow	fecal sample | Pathogen | Bos taurus | not applicable |	PRJNA224116	SAMN27298901	CF260	2006	United Kingdom
GCF_023499035.1	animal	farm_animal	cow	Nostril sample | Pathogen | Bos taurus | not applicable |	PRJNA224116	SAMN27298903	CN35	2006	United Kingdom
GCF_023499005.1	animal	farm_animal	cow	Nostril sample | Pathogen | Bos taurus | not applicable |	PRJNA224116	SAMN27298902	CN26	2006	United Kingdom
GCF_041321005.1	animal	farm_animal	duck	embryos | Pathogen | duck | Dead embryos |	PRJNA224116	SAMN43139119	ZWAb067	2022	China
GCF_021729465.1	animal	farm_animal	duck	stool | Pathogen | Duck | Not available |	PRJNA224116	SAMN15182649	YC103	2019	China
GCF_013394285.1	animal	farm_animal	duck	feces | Acinetobacter baumannii 29FS20 isolated from the feces of duck | duck | missing |	PRJNA224116	SAMN12859885	29FS20	2017	China
GCF_013394265.1	animal	farm_animal	duck	feces | Acinetobacter baumannii 31FS3-2 isolated from the feces of duck | duck | missing |	PRJNA224116	SAMN12860376	31FS3-2	2017	China
GCF_012974585.1	animal	farm_animal	duck	trachea | Pathogen | Duck | mixed culture | not collected | not collected |	PRJNA224116	SAMN14072279	ABF9692	2017	China
GCF_002573915.1	animal	farm_animal	goose	Microbe sample from Acinetobacter baumannii | goose | environmental sample |	PRJNA224116	SAMN07236633	Gaensemehl-2	2016	Germany
GCF_002573905.1	animal	farm_animal	goose	egg shells | Microbe sample from Acinetobacter baumannii | goose | tissue sample | egg shells |	PRJNA224116	SAMN07236632	GaenseEi-1	2016	Germany
GCF_001693095.1	animal	farm_animal	goose	Microbe sample from Acinetobacter baumannii | goose | tissue sample | choana |	PRJNA224116	SAMN05257111	3.5D	2013	Germany
GCF_008801795.1	animal	farm_animal	horse	conjunctivitis | Microbe sample from Acinetobacter baumannii | horse | Whole organism |	PRJNA224116	SAMN10426731	161514	2016	Germany
GCF_030377795.1	animal	farm_animal	horse	respiratory sample | Microbe sample from Acinetobacter baumannii | horse | not applicable | bacterial sample |	PRJNA224116	SAMN28422559	44017	2019	France
GCF_030377755.1	animal	farm_animal	horse	lymphatic glanglion | Microbe sample from Acinetobacter baumannii | horse | not applicable | bacterial sample |	PRJNA224116	SAMN28422563	43344	2016	France
GCF_030377655.1	animal	farm_animal	horse	wound | Microbe sample from Acinetobacter baumannii | horse | not applicable | bacterial sample |	PRJNA224116	SAMN28422566	47244	2017	France
GCF_030377635.1	animal	farm_animal	horse	not determined | Microbe sample from Acinetobacter baumannii | horse | not applicable | bacterial sample |	PRJNA224116	SAMN28422568	46732	2017	France
GCF_030377625.1	animal	farm_animal	horse	wound | Microbe sample from Acinetobacter baumannii | horse | not applicable | bacterial sample |	PRJNA224116	SAMN28422567	48031	2017	France
GCF_030377555.1	animal	farm_animal	horse	eye swab | Microbe sample from Acinetobacter baumannii | horse | not applicable | bacterial sample |	PRJNA224116	SAMN28422573	44391	2016	France
GCF_030377525.1	animal	farm_animal	horse	wound | Microbe sample from Acinetobacter baumannii | horse | not applicable | bacterial sample |	PRJNA224116	SAMN28422572	53828	2019	France
GCA_026473365.1	animal	farm_animal	horse	nasal cavity | Pathogen | Horse | IHIT42660 | unknown |	PRJNA514245	SAMN31868700	GCA_026473365.1	2020	Germany
GCA_026473345.1	animal	farm_animal	horse	wound | Pathogen | Horse | IHIT38021 | unknown |	PRJNA514245	SAMN31868690	GCA_026473345.1	2018	Germany
GCA_026473325.1	animal	farm_animal	horse	lymph node | Pathogen | Horse | IHIT38168 | unknown |	PRJNA514245	SAMN31868691	GCA_026473325.1	2018	Germany
GCA_026473305.1	animal	farm_animal	horse	screw surgery | Pathogen | Horse | IHIT40381 | unknown |	PRJNA514245	SAMN31868697	GCA_026473305.1	2019	Germany
GCA_026473265.1	animal	farm_animal	horse	wound | Pathogen | Horse | IHIT37442 | unknown |	PRJNA514245	SAMN31868687	GCA_026473265.1	2018	Germany
GCA_026473125.1	animal	farm_animal	horse	cervix swab | Pathogen | Horse | IHIT32538 | unknown |	PRJNA514245	SAMN31868676	GCA_026473125.1	2016	Germany
GCA_026473065.1	animal	farm_animal	horse	wound suture | Pathogen | Horse | IHIT31711 | unknown |	PRJNA514245	SAMN31868671	GCA_026473065.1	2016	Germany
GCA_026473005.1	animal	farm_animal	horse	cervix swab | Pathogen | Horse | IHIT26873 | unknown |	PRJNA514245	SAMN31868657	GCA_026473005.1	2014	Germany
GCA_026472985.1	animal	farm_animal	horse	feces | Pathogen | Horse | IHIT26669 | unknown |	PRJNA514245	SAMN31868655	GCA_026472985.1	2014	Germany
GCA_026472945.1	animal	farm_animal	horse	wound | Pathogen | Horse | IHIT25667 | unknown |	PRJNA514245	SAMN31868652	GCA_026472945.1	2014	Germany
GCA_026472925.1	animal	farm_animal	horse	feces | Pathogen | Horse | IHIT26023 | unknown |	PRJNA514245	SAMN31868653	GCA_026472925.1	2014	Germany
GCA_026471705.1	animal	farm_animal	horse	eye | Pathogen | Horse | IHIT15773 | unknown |	PRJNA514245	SAMN31868625	GCA_026471705.1	2009	Germany
GCF_015571935.1	animal	farm_animal	pig	swab | Pathogen | Sus scrofa domesticus | missing |	PRJNA224116	SAMN16304032	Res13-Abat-PEA21-P4-01-A	2018	Canada
GCF_023498995.1	animal	farm_animal	pig	fecal sample | Pathogen | Sus scrofa domesticus | not applicable |	PRJNA224116	SAMN27298905	PF16	2006	United Kingdom
GCF_023498955.1	animal	farm_animal	pig	fecal sample | Pathogen | Sus scrofa domesticus | not applicable |	PRJNA224116	SAMN27298909	PF34	2006	United Kingdom
GCF_023498905.1	animal	farm_animal	pig	fecal sample | Pathogen | Sus scrofa domesticus | not applicable |	PRJNA224116	SAMN27298908	PF20	2006	United Kingdom
GCF_023498895.1	animal	farm_animal	pig	fecal sample | Pathogen | Sus scrofa domesticus | not applicable |	PRJNA224116	SAMN27298910	PF36	2006	United Kingdom
GCF_023498875.1	animal	farm_animal	pig	fecal sample | Pathogen | Sus scrofa domesticus | not applicable |	PRJNA224116	SAMN27298906	PF18	2006	United Kingdom
GCF_015676875.1	animal	farm_animal	pig	swab | Pathogen | Sus scrofa domesticus | missing |	PRJNA224116	SAMN16304027	Res13-Abat-EA3-S5-02-A	2018	Canada
GCF_015676835.1	animal	farm_animal	pig	swab | Pathogen | Sus scrofa domesticus | missing |	PRJNA224116	SAMN16304029	Res13-Abat-PEA16-P5-01-A	2018	Canada
GCF_015676635.1	animal	farm_animal	pig	swab | Pathogen | Sus scrofa domesticus | missing |	PRJNA224116	SAMN16304042	Res13-Abat-PEA28-P5-02-A	2018	Canada
GCF_015676585.1	animal	farm_animal	pig	swab | Pathogen | Sus scrofa domesticus | missing |	PRJNA224116	SAMN16304041	Res13-Abat-PEA25-P5-02	2018	Canada
GCF_013346455.1	animal	farm_animal	pig	feces | Pathogen | Sus scrofa | missing |	PRJNA224116	SAMN15105067	KCJK8630	2018	USA
GCF_013346445.1	animal	farm_animal	pig	feces | Pathogen | Sus scrofa | missing |	PRJNA224116	SAMN15105068	KCJK8620	2018	USA
GCF_003994455.1	animal	farm_animal	pig	feces | Pathogen | pig | colonization |	PRJNA224116	SAMN10662617	AB18PR065	2018	China
GCA_028438905.1	animal	farm_animal	pig	Microbe sample from Acinetobacter baumannii | Sus scrofa domesticus | cell culture |	PRJNA862736	SAMN29993274	IMT31302_S10	2013	Germany
GCA_028438805.1	animal	farm_animal	pig	Microbe sample from Acinetobacter baumannii | Sus scrofa domesticus | cell culture |	PRJNA862736	SAMN29993275	IMT31303_S7	2013	Germany
GCA_028438725.1	animal	farm_animal	pig	Microbe sample from Acinetobacter baumannii | Sus scrofa domesticus | cell culture |	PRJNA862736	SAMN29993276	IMT31305_S8	2013	Germany
GCF_035788155.1	animal	farm_animal	pig	nasal swab | Microbe sample from Acinetobacter baumannii | Sus scrofa cristatus | Microbe Culture |	PRJNA224116	SAMN27533443	G44	2019	India
GCF_035783195.1	animal	farm_animal	pig	rectal swab | Microbe sample from Acinetobacter baumannii | Sus scrofa cristatus | Microbe culture |	PRJNA224116	SAMN27533008	G111	2019	India
GCF_023498975.1	animal	farm_animal	pig	fecal sample | Pathogen | Sus scrofa domesticus | not applicable |	PRJNA224116	SAMN27298904	PF07	2006	United Kingdom
GCF_023498915.1	animal	farm_animal	pig	fecal sample | Pathogen | Sus scrofa domesticus | not applicable |	PRJNA224116	SAMN27298907	PF19	2006	United Kingdom
GCF_044005605.1	animal	farm_animal	sheep	Microbe sample from Acinetobacter baumannii | sheep | cell culture |	PRJNA224116	SAMN16274433	ab20A1	2020	China
GCF_002753915.1	animal	farm_animal	sheep	sheep brocho-alveolar lavage | Pathogen | Ovis aries | pneumonia |	PRJNA224116	SAMN07945345	AbPK1	2012	Pakistan
GCA_028445625.1	animal	farm_animal	turkey	Microbe sample from Acinetobacter baumannii | Meleagris gallopavo | cell culture |	PRJNA862736	SAMN29993002	15-BAuA-Bod1	2015	Germany
GCA_028445565.1	animal	farm_animal	turkey	Microbe sample from Acinetobacter baumannii | Meleagris gallopavo | cell culture |	PRJNA862736	SAMN29993003	15-BauABod-4	2015	Germany
GCF_027257815.1	animal	farm_animal	turkey	Microbe sample from Acinetobacter baumannii | Meleagris gallopavo | culture |	PRJNA224116	SAMN31846761	141_Diagnostik	2019	Germany
GCF_002573805.1	animal	farm_animal	turkey	Microbe sample from Acinetobacter baumannii | turkey | environmental sample |	PRJNA224116	SAMN07236635	BAuABod-3	2015	Germany
GCF_045798685.1	animal	food	buffalo_meat	buffalo meat | Pathogen |	PRJNA224116	SAMN37316472	VCHLPT_B30	2022	India
GCF_045798665.1	animal	food	buffalo_meat	buffalo meat | Pathogen |	PRJNA224116	SAMN37316473	VCHLPT_B59	2022	India
GCF_045798765.1	animal	food	chicken_meat	chicken meat | Pathogen |	PRJNA224116	SAMN37316469	VCHLPT_C33	2021	India
GCF_045798705.1	animal	food	chicken_meat	chicken meat | Pathogen |	PRJNA224116	SAMN37316468	VCHLPT_C32	2021	India
GCF_040698725.1	animal	food	chicken_meat	Retail chicken | Chicken | chicken | not applicable |	PRJNA224116	SAMN42361435	CM14A	2023	India
GCF_040698705.1	animal	food	chicken_meat	Retail chicken | Chicken | chicken | not applicable |	PRJNA224116	SAMN42361436	CM13A	2023	India
GCF_040698665.1	animal	food	chicken_meat	Retail chicken | Chicken | chicken | not applicable |	PRJNA224116	SAMN42361439	CM16A	2023	India
GCF_040698495.1	animal	food	chicken_meat	Retail chicken | Chicken | chicken | not applicable |	PRJNA224116	SAMN42361437	CM68B	2023	India
GCF_040698455.1	animal	food	chicken_meat	Retail chicken | Chicken | chicken | not applicable |	PRJNA224116	SAMN42361438	CM69C	2023	India
GCF_045065635.1	animal	food	cow_milk	milk | Pathogen | missing | missing |	PRJNA224116	SAMN41177282	CCRI-14062	Missing	Missing
GCF_046709205.1	animal	food	cow_milk	Raw Milk | One Health Enteric sample from Acinetobacter baumannii | Survelleince of Antimicrobial resistant in raw milk | food |	PRJNA224116	SAMN45933956	ABACDS02	2024	India
GCF_032944255.1	animal	food	cow_milk	Tankmilk | Microbe sample from Acinetobacter baumannii | Not collected | Whole Organism |	PRJNA224116	SAMN26898558	IK17	Missing	Indonesia
GCF_032944235.1	animal	food	cow_milk	Tankmilk | Microbe sample from Acinetobacter baumannii | Not collected | Whole Organism |	PRJNA224116	SAMN26898557	IK16	Missing	Germany
GCF_032941715.1	animal	food	cow_milk	Tankmilk | Microbe sample from Acinetobacter baumannii | Not collected | Whole Organism |	PRJNA224116	SAMN26898552	IK11	Missing	Germany
GCF_032941655.1	animal	food	cow_milk	Tankmilk | Microbe sample from Acinetobacter baumannii | Not collected | Whole Organism |	PRJNA224116	SAMN26898553	IK12	Missing	Germany
GCF_032941635.1	animal	food	cow_milk	Tankmilk | Microbe sample from Acinetobacter baumannii | Not collected | Whole Organism |	PRJNA224116	SAMN26898554	IK13	Missing	Germany
GCF_032941605.1	animal	food	cow_milk	Tankmilk | Microbe sample from Acinetobacter baumannii | Not collected | Whole Organism |	PRJNA224116	SAMN26898555	IK14	Missing	Germany
GCF_032941395.1	animal	food	cow_milk	Tankmilk | Microbe sample from Acinetobacter baumannii | Not collected | Whole Organism |	PRJNA224116	SAMN26898560	IK19	Missing	Indonesia
GCF_032941345.1	animal	food	cow_milk	Tankmilk | Microbe sample from Acinetobacter baumannii | Not collected | Whole Organism |	PRJNA224116	SAMN26898561	IK20	Missing	Indonesia
GCF_032941335.1	animal	food	cow_milk	Tankmilk | Microbe sample from Acinetobacter baumannii | Not collected | Whole Organism |	PRJNA224116	SAMN26898562	IK21	Missing	Indonesia
GCF_032941245.1	animal	food	cow_milk	Tankmilk | Microbe sample from Acinetobacter baumannii | Not collected | Whole Organism |	PRJNA224116	SAMN26898563	IK26	Missing	Indonesia
GCF_032941225.1	animal	food	cow_milk	Tankmilk | Microbe sample from Acinetobacter baumannii | Not collected | Whole Organism |	PRJNA224116	SAMN26898564	IK27	Missing	Indonesia
GCF_024705725.1	animal	food	cow_milk	Tankmilk | Microbe sample from Acinetobacter baumannii | Not collected | Whole Organism |	PRJNA224116	SAMN26898556	IK15	Missing	Germany
GCF_032941065.1	animal	food	cow_milk	Tankmilk | Microbe sample from Acinetobacter baumannii | Not collected | Whole Organism |	PRJNA224116	SAMN26898565	IK28	Missing	Indonesia
GCF_032941005.1	animal	food	cow_milk	Tankmilk | Microbe sample from Acinetobacter baumannii | Not collected | Whole Organism |	PRJNA224116	SAMN26898566	IK29	Missing	Indonesia
GCF_045798645.1	animal	food	pig_meat	pig meat | Pathogen |	PRJNA224116	SAMN37316474	VCHLPT_P54	2022	India
GCF_045798625.1	animal	food	pig_meat	pig meat | Pathogen |	PRJNA224116	SAMN37316475	VCHLPT_P57	2022	India
GCF_040698635.1	animal	food	pig_meat	Retail Pork | Pork | pig | not applicable |	PRJNA224116	SAMN42361432	PM56A	2023	India
GCF_040698595.1	animal	food	pig_meat	Retail pork | Pork | pig | not applicable |	PRJNA224116	SAMN42361430	PM118D	2023	India
GCF_040698575.1	animal	food	pig_meat	Retail pork | Pork | pig | not applicable |	PRJNA224116	SAMN42361429	PM125D	2023	India
GCF_040698565.1	animal	food	pig_meat	Retail Pork | Pork | pig | not applicable |	PRJNA224116	SAMN42361431	PM57D	2023	India
GCA_022967635.1	animal	food	salmon	SALMON (SA) | Pathogen |	PRJNA800017	SAMN26198626	19SD04SA05	2019	USA
GCA_022967315.1	animal	food	salmon	SALMON (SA) | Pathogen |	PRJNA800017	SAMN26198668	19SC05SA01	2019	USA
GCA_022967295.1	animal	food	salmon	SALMON (SA) | Pathogen |	PRJNA800017	SAMN26198671	19SC05SA06-1	2019	USA
GCA_022967235.1	animal	food	salmon	SALMON (SA) | Pathogen |	PRJNA800017	SAMN26198480	19SC02SA05	2019	USA
GCA_022966975.1	animal	food	salmon	SALMON (SA) | Pathogen |	PRJNA800017	SAMN26198685	19SC06SA02-1	2019	USA
GCA_022966395.1	animal	food	salmon	SALMON (SA) | Pathogen |	PRJNA800017	SAMN26198686	19SC06SA02-2	2019	USA
GCF_045798745.1	animal	food	sheep_meat	sheep meat | Pathogen |	PRJNA224116	SAMN37316471	VCHLPT_M11	2022	India
GCF_045798725.1	animal	food	sheep_meat	sheep meat | Pathogen |	PRJNA224116	SAMN37316470	VCHLPT_M28	2022	India
GCA_022967675.1	animal	food	shrimp	SHRIMP (SH) | Pathogen |	PRJNA800017	SAMN26198640	19SC04SH08	2019	USA
GCA_022967275.1	animal	food	shrimp	SHRIMP (SH) | Pathogen |	PRJNA800017	SAMN26198564	19SD02SH05	2019	USA
GCA_022967255.1	animal	food	shrimp	SHRIMP (SH) | Pathogen |	PRJNA800017	SAMN26198577	19NY01SH05	2019	USA
GCF_045798585.1	animal	food	undefined_prawn_tissue	prawn tissue | Pathogen |	PRJNA224116	SAMN37316476	VCHLPT_F24	2021	India
GCA_025291755.1	animal	insect	bee_honey	gut | MIMAG Metagenome-assembled Genome sample from Acinetobacter baumannii | Apis mellifera | BHI1-bin.3 | metagenomic assembly | gut biome | gut biome | gut | gut metagenome |	PRJNA825364	SAMN27531701	GCA_025291755.1	2020	China
GCA_025291655.1	animal	insect	bee_honey	gut | MIMAG Metagenome-assembled Genome sample from Acinetobacter baumannii | Apis mellifera | BHI2-bin.4 | metagenomic assembly | gut biome | gut biome | gut | gut metagenome |	PRJNA825364	SAMN27531706	GCA_025291655.1	2020	China
GCA_028446185.1	animal	wildlife	bird	feather | Microbe sample from Acinetobacter baumannii | bird | cell culture |	PRJNA862736	SAMN29992971	14-Fe-1	2014	Germany
GCF_022660835.1	animal	wildlife	bird	Choanal swab of a migratory bird | Microbe sample from Acinetobacter baumannii AC1 | Dendrocygna viduata | Single Bacteria Cell |	PRJNA224116	SAMN13935716	AC1	2012	Brazil
GCF_040698405.1	animal	wildlife	fish	Fish gills | Fish gills | fish | not applicable |	PRJNA224116	SAMN42361433	FM3E	2023	India
GCF_036441095.1	animal	wildlife	fish	missing | Pathogen | fish |	PRJNA224116	SAMN16745910	20-MO00652-0	2018	Germany
GCA_028444145.1	animal	wildlife	heron	egg shell | Microbe sample from Acinetobacter baumannii | Ardea cinerea | cell culture |	PRJNA862736	SAMN29993078	16-Reih3-Ei-1	2016	Germany
GCA_028444865.1	animal	wildlife	kestrel	pellet | Microbe sample from Acinetobacter baumannii | Falco tinnunculus | cell culture |	PRJNA862736	SAMN29993039	15-TF22	2015	Germany
GCA_022953895.1	animal	wildlife	lizard	feces | Microbe sample from Acinetobacter baumannii | Lizard | IHIT35886 | tissue sample |	PRJNA514245	SAMN27279134	GCA_022953895.1	2013	Viet Nam
GCA_022936505.1	animal	wildlife	lizard	skin | Microbe sample from Acinetobacter baumannii | Lizard | IHIT35878 | tissue sample |	PRJNA514245	SAMN27279127	GCA_022936505.1	2013	USA
GCA_022935365.1	animal	wildlife	lizard	feces | Microbe sample from Acinetobacter baumannii | Lizard | IHIT35890 | tissue sample |	PRJNA514245	SAMN27279138	GCA_022935365.1	2013	USA
GCA_022933395.1	animal	wildlife	lizard	feces | Microbe sample from Acinetobacter baumannii | Lizard | IHIT35879 | tissue sample |	PRJNA514245	SAMN27279128	GCA_022933395.1	2013	Canada
GCA_028445525.1	animal	wildlife	mallard	Microbe sample from Acinetobacter baumannii | Anas platyrhynchos | cell culture |	PRJNA862736	SAMN29993007	15-EntAmr1	2015	Germany
GCA_028445025.1	animal	wildlife	mouse	Microbe sample from Acinetobacter baumannii | Mus musculus | cell culture |	PRJNA862736	SAMN29993032	15-NCu32R24h	2015	Germany
GCA_028444965.1	animal	wildlife	mouse	Microbe sample from Acinetobacter baumannii | Mus musculus | cell culture |	PRJNA862736	SAMN29993033	15-NWi34	2015	Germany
GCF_008124045.1	animal	wildlife	mouse	mouse gut | Acinetobacter baumannii |	PRJNA224116	SAMN12603273	PG20180064	2018	Missing
GCA_028445035.1	animal	wildlife	mouse	Microbe sample from Acinetobacter baumannii | Mus musculus | cell culture |	PRJNA862736	SAMN29993031	15-NCu29D-2	2015	Germany
GCA_028444875.1	animal	wildlife	owl	pellet | Microbe sample from Acinetobacter baumannii | Asio otus | cell culture |	PRJNA862736	SAMN29993040	15-Woeul6	2015	Germany
GCF_022369355.1	animal	wildlife	pangolin	Manis javanica | Pathogen |	PRJNA224116	SAMN15589941	M175-3	2018	China
GCF_022369275.1	animal	wildlife	pangolin	Manis javanica | Pathogen |	PRJNA224116	SAMN15438232	M164-3	2018	China
GCF_002367895.1	animal	wildlife	parrot	Microbe sample from Acinetobacter baumannii | grey parrot | tissue sample | nose |	PRJNA224116	SAMN07673494	IHIT32296	2016	Luxembourg
GCA_028438505.1	animal	wildlife	python	Microbe sample from Acinetobacter baumannii | Pythonidae | cell culture |	PRJNA862736	SAMN29993289	IMT32876_S17	2013	Germany
GCA_028438615.1	animal	wildlife	rabbit	Microbe sample from Acinetobacter baumannii | Oryctolagus cuniculus | cell culture |	PRJNA862736	SAMN29993284	IMT32894_S25	2014	Germany
GCA_028438535.1	animal	wildlife	rabbit	Microbe sample from Acinetobacter baumannii | Oryctolagus cuniculus | cell culture |	PRJNA862736	SAMN29993288	IMT32473_S16	2013	Germany
GCF_020985285.1	animal	wildlife	salamander	Andrias davidianus | Pathogen |	PRJNA224116	SAMN23235066	SHOU-Ab01	2021	China
GCA_028446235.1	animal	wildlife	shrew	Microbe sample from Acinetobacter baumannii | Soricidae | cell culture |	PRJNA862736	SAMN29992972	14-SPoe1-1	2014	Germany
GCA_028446205.1	animal	wildlife	shrew	Microbe sample from Acinetobacter baumannii | Soricidae | cell culture |	PRJNA862736	SAMN29992973	14-SPoe3-1	2014	Germany
GCA_028444065.1	animal	wildlife	shrew	Microbe sample from Acinetobacter baumannii | Soricidae | cell culture |	PRJNA862736	SAMN29993080	16-SUl21-2	2016	Germany
GCA_022935405.1	animal	wildlife	snake	feces | Microbe sample from Acinetobacter baumannii | Snake | IHIT35882 | tissue sample |	PRJNA514245	SAMN27279131	GCA_022935405.1	2013	Canada
GCA_022934405.1	animal	wildlife	snake	feces | Microbe sample from Acinetobacter baumannii | Snake | IHIT35887 | tissue sample |	PRJNA514245	SAMN27279135	GCA_022934405.1	2013	USA
GCA_028445785.1	animal	wildlife	stork	Microbe sample from Acinetobacter baumannii | Ciconia ciconia | cell culture |	PRJNA862736	SAMN29992994	15-8P03-1	2015	Poland
GCA_028445775.1	animal	wildlife	stork	Microbe sample from Acinetobacter baumannii | Ciconia ciconia | cell culture |	PRJNA862736	SAMN29992992	15-7P836-1	2015	Poland
GCA_028445765.1	animal	wildlife	stork	Microbe sample from Acinetobacter baumannii | Ciconia ciconia | cell culture |	PRJNA862736	SAMN29992996	15-8P813-1	2015	Poland
GCA_028445735.1	animal	wildlife	stork	Microbe sample from Acinetobacter baumannii | Ciconia ciconia | cell culture |	PRJNA862736	SAMN29992995	15-8P807-1	2015	Poland
GCA_028445725.1	animal	wildlife	stork	Microbe sample from Acinetobacter baumannii | Ciconia ciconia | cell culture |	PRJNA862736	SAMN29992997	15-8P814-1	2015	Poland
GCA_028445705.1	animal	wildlife	stork	Microbe sample from Acinetobacter baumannii | Ciconia ciconia | cell culture |	PRJNA862736	SAMN29992999	15-8P826-1	2015	Poland
GCA_028445675.1	animal	wildlife	stork	Microbe sample from Acinetobacter baumannii | Ciconia ciconia | cell culture |	PRJNA862736	SAMN29992998	15-8P821-2	2015	Poland
GCA_028445665.1	animal	wildlife	stork	Microbe sample from Acinetobacter baumannii | Ciconia ciconia | cell culture |	PRJNA862736	SAMN29993000	15-932-1	2015	Germany
GCA_028445645.1	animal	wildlife	stork	Microbe sample from Acinetobacter baumannii | Ciconia ciconia | cell culture |	PRJNA862736	SAMN29993001	15-932-2	2015	Poland
GCA_028445585.1	animal	wildlife	stork	Microbe sample from Acinetobacter baumannii | Ciconia ciconia | cell culture |	PRJNA862736	SAMN29993005	15-Eisch21-2	2015	Poland
GCA_028445575.1	animal	wildlife	stork	Microbe sample from Acinetobacter baumannii | Ciconia ciconia | cell culture |	PRJNA862736	SAMN29993006	15-Eisch26-1	2015	Poland
GCA_028445545.1	animal	wildlife	stork	Microbe sample from Acinetobacter baumannii | Ciconia ciconia | cell culture |	PRJNA862736	SAMN29993004	15-Eisch20-1	2015	Poland
GCA_028445505.1	animal	wildlife	stork	Microbe sample from Acinetobacter baumannii | Ciconia ciconia | cell culture |	PRJNA862736	SAMN29993009	15-HN634-1	2015	Germany
GCA_028445485.1	animal	wildlife	stork	pellet | Microbe sample from Acinetobacter baumannii | Ciconia ciconia | cell culture |	PRJNA862736	SAMN29993008	15-Geschum2	2015	Germany
GCA_028445455.1	animal	wildlife	stork	Microbe sample from Acinetobacter baumannii | Ciconia ciconia | cell culture |	PRJNA862736	SAMN29993011	15-HN637-2	2015	Germany
GCA_028445445.1	animal	wildlife	stork	Microbe sample from Acinetobacter baumannii | Ciconia ciconia | cell culture |	PRJNA862736	SAMN29993010	15-HN637-1	2015	Germany
GCA_028445425.1	animal	wildlife	stork	Microbe sample from Acinetobacter baumannii | Ciconia ciconia | cell culture |	PRJNA862736	SAMN29993012	15-Klo_3-2	2015	Poland
GCA_028445395.1	animal	wildlife	stork	Microbe sample from Acinetobacter baumannii | Ciconia ciconia | cell culture |	PRJNA862736	SAMN29993013	15-Klo_33-1	2015	Poland
GCA_028445385.1	animal	wildlife	stork	Microbe sample from Acinetobacter baumannii | Ciconia ciconia | cell culture |	PRJNA862736	SAMN29993014	15-Klo_4-1	2015	Poland
GCA_028445355.1	animal	wildlife	stork	Microbe sample from Acinetobacter baumannii | Ciconia ciconia | cell culture |	PRJNA862736	SAMN29993015	15-Klo_47-1	2015	Poland
GCA_028445345.1	animal	wildlife	stork	Microbe sample from Acinetobacter baumannii | Ciconia ciconia | cell culture |	PRJNA862736	SAMN29993016	15-Klo_5-1	2015	Poland
GCA_028445325.1	animal	wildlife	stork	Microbe sample from Acinetobacter baumannii | Ciconia ciconia | cell culture |	PRJNA862736	SAMN29993017	15-Klo_56TR-1	2015	Poland
GCA_028445295.1	animal	wildlife	stork	Microbe sample from Acinetobacter baumannii | Ciconia ciconia | cell culture |	PRJNA862736	SAMN29993018	15-Klo_71TR-1	2015	Poland
GCA_028445285.1	animal	wildlife	stork	Microbe sample from Acinetobacter baumannii | Ciconia ciconia | cell culture |	PRJNA862736	SAMN29993019	15-Klo28-1	2015	Poland
GCA_028445265.1	animal	wildlife	stork	Microbe sample from Acinetobacter baumannii | Ciconia ciconia | cell culture |	PRJNA862736	SAMN29993021	15-Klop35-1	2015	Poland
GCA_028445235.1	animal	wildlife	stork	Microbe sample from Acinetobacter baumannii | Ciconia ciconia | cell culture |	PRJNA862736	SAMN29993020	15-Klo59TR-1	2015	Poland
GCA_028445225.1	animal	wildlife	stork	Microbe sample from Acinetobacter baumannii | Ciconia ciconia | cell culture |	PRJNA862736	SAMN29993022	15-Klop48-1	2015	Poland
GCA_028445205.1	animal	wildlife	stork	Microbe sample from Acinetobacter baumannii | Ciconia ciconia | cell culture |	PRJNA862736	SAMN29993023	15-Lo_HL620-1	2015	Germany
GCA_028445185.1	animal	wildlife	stork	Microbe sample from Acinetobacter baumannii | Ciconia ciconia | cell culture |	PRJNA862736	SAMN29993024	15-LoFedHofOst2-1	2015	Germany
GCA_028445165.1	animal	wildlife	stork	Microbe sample from Acinetobacter baumannii | Ciconia ciconia | cell culture |	PRJNA862736	SAMN29993025	15-LoFedIst2-1	2015	Germany
GCA_028445135.1	animal	wildlife	stork	Microbe sample from Acinetobacter baumannii | Ciconia ciconia | cell culture |	PRJNA862736	SAMN29993026	15-LoFedIst4-1	2015	Germany
GCA_028445125.1	animal	wildlife	stork	pellet | Microbe sample from Acinetobacter baumannii | Ciconia ciconia | cell culture |	PRJNA862736	SAMN29993027	15-LoGeW1-5-1	2015	Germany
GCA_028445105.1	animal	wildlife	stork	Microbe sample from Acinetobacter baumannii | Ciconia ciconia | cell culture |	PRJNA862736	SAMN29993030	15-LoHL619-1	2015	Germany
GCA_028445075.1	animal	wildlife	stork	pellet | Microbe sample from Acinetobacter baumannii | Ciconia ciconia | cell culture |	PRJNA862736	SAMN29993028	15-LoGeW2-11-2	2015	Germany
GCA_028445065.1	animal	wildlife	stork	Microbe sample from Acinetobacter baumannii | Ciconia ciconia | cell culture |	PRJNA862736	SAMN29993029	15-LoHL610-1	2015	Germany
GCA_028444985.1	animal	wildlife	stork	Microbe sample from Acinetobacter baumannii | Ciconia ciconia | cell culture |	PRJNA862736	SAMN29993035	15-Pos25-1	2015	Poland
GCA_028444975.1	animal	wildlife	stork	pellet | Microbe sample from Acinetobacter baumannii | Ciconia ciconia | cell culture |	PRJNA862736	SAMN29993034	15-ODR_Wezyska_12-2	2015	Poland
GCA_028444935.1	animal	wildlife	stork	Microbe sample from Acinetobacter baumannii | Ciconia ciconia | cell culture |	PRJNA862736	SAMN29993036	15-PosEisch11-1	2015	Poland
GCA_028444925.1	animal	wildlife	stork	Microbe sample from Acinetobacter baumannii | Ciconia ciconia | cell culture |	PRJNA862736	SAMN29993037	15-Posen_19-1	2015	Poland
GCA_028444885.1	animal	wildlife	stork	Microbe sample from Acinetobacter baumannii | Ciconia ciconia | cell culture |	PRJNA862736	SAMN29993038	15-Posen_P44-1	2015	Poland
GCA_028444845.1	animal	wildlife	stork	Microbe sample from Acinetobacter baumannii | Ciconia ciconia | cell culture |	PRJNA862736	SAMN29993042	16-012-1	2016	Poland
GCA_028444825.1	animal	wildlife	stork	Microbe sample from Acinetobacter baumannii | Ciconia ciconia | cell culture |	PRJNA862736	SAMN29993043	16-02P46T-1	2016	Poland
GCA_028444805.1	animal	wildlife	stork	Microbe sample from Acinetobacter baumannii | Ciconia ciconia | cell culture |	PRJNA862736	SAMN29993044	16-02P50T-1	2016	Poland
GCA_028444785.1	animal	wildlife	stork	Microbe sample from Acinetobacter baumannii | Ciconia ciconia | cell culture |	PRJNA862736	SAMN29993045	16-106-3	2016	Poland
GCA_028444765.1	animal	wildlife	stork	Microbe sample from Acinetobacter baumannii | Ciconia ciconia | cell culture |	PRJNA862736	SAMN29993047	16-112-1	2016	Poland
GCA_028444745.1	animal	wildlife	stork	Microbe sample from Acinetobacter baumannii | Ciconia ciconia | cell culture |	PRJNA862736	SAMN29993046	16-107-1	2016	Poland
GCA_028444715.1	animal	wildlife	stork	Microbe sample from Acinetobacter baumannii | Ciconia ciconia | cell culture |	PRJNA862736	SAMN29993049	16-14P07T-1	2016	Poland
GCA_028444705.1	animal	wildlife	stork	Microbe sample from Acinetobacter baumannii | Ciconia ciconia | cell culture |	PRJNA862736	SAMN29993048	16-118-1	2016	Poland
GCA_028444685.1	animal	wildlife	stork	Microbe sample from Acinetobacter baumannii | Ciconia ciconia | cell culture |	PRJNA862736	SAMN29993050	16-14P21T-1	2016	Poland
GCA_028444665.1	animal	wildlife	stork	Microbe sample from Acinetobacter baumannii | Ciconia ciconia | cell culture |	PRJNA862736	SAMN29993052	16-15P42C-3	2016	Poland
GCA_028444645.1	animal	wildlife	stork	Microbe sample from Acinetobacter baumannii | Ciconia ciconia | cell culture |	PRJNA862736	SAMN29993051	16-14P24T-1	2016	Poland
GCA_028444625.1	animal	wildlife	stork	Microbe sample from Acinetobacter baumannii | Ciconia ciconia | cell culture |	PRJNA862736	SAMN29993053	16-26-4	2016	Poland
GCA_028444605.1	animal	wildlife	stork	Microbe sample from Acinetobacter baumannii | Ciconia ciconia | cell culture |	PRJNA862736	SAMN29993055	16-2P26C1	2016	Poland
GCA_028444585.1	animal	wildlife	stork	Microbe sample from Acinetobacter baumannii | Ciconia ciconia | cell culture |	PRJNA862736	SAMN29993054	16-27-1	2016	Poland
GCA_028444555.1	animal	wildlife	stork	Microbe sample from Acinetobacter baumannii | Ciconia ciconia | cell culture |	PRJNA862736	SAMN29993056	16-32-1	2016	Poland
GCA_028444545.1	animal	wildlife	stork	Microbe sample from Acinetobacter baumannii | Ciconia ciconia | cell culture |	PRJNA862736	SAMN29993057	16-33-1	2016	Poland
GCA_028444525.1	animal	wildlife	stork	Microbe sample from Acinetobacter baumannii | Ciconia ciconia | cell culture |	PRJNA862736	SAMN29993058	16-68-1	2016	Poland
GCA_028444485.1	animal	wildlife	stork	Microbe sample from Acinetobacter baumannii | Ciconia ciconia | cell culture |	PRJNA862736	SAMN29993061	16-Klo_102-1	2016	Poland
GCA_028444465.1	animal	wildlife	stork	Microbe sample from Acinetobacter baumannii | Ciconia ciconia | cell culture |	PRJNA862736	SAMN29993059	16-81-1	2016	Poland
GCA_028444445.1	animal	wildlife	stork	Microbe sample from Acinetobacter baumannii | Ciconia ciconia | cell culture |	PRJNA862736	SAMN29993062	16-Klo_103-1	2016	Poland
GCA_028444425.1	animal	wildlife	stork	Microbe sample from Acinetobacter baumannii | Ciconia ciconia | cell culture |	PRJNA862736	SAMN29993063	16-Klo_106-1	2016	Poland
GCA_028444395.1	animal	wildlife	stork	Microbe sample from Acinetobacter baumannii | Ciconia ciconia | cell culture |	PRJNA862736	SAMN29993065	16-Klo_21-1	2016	Poland
GCA_028444375.1	animal	wildlife	stork	Microbe sample from Acinetobacter baumannii | Ciconia ciconia | cell culture |	PRJNA862736	SAMN29993066	16-Klo_26-1	2016	Poland
GCA_028444365.1	animal	wildlife	stork	Microbe sample from Acinetobacter baumannii | Ciconia ciconia | cell culture |	PRJNA862736	SAMN29993064	16-Klo_18-1	2016	Poland
GCA_028444345.1	animal	wildlife	stork	Microbe sample from Acinetobacter baumannii | Ciconia ciconia | cell culture |	PRJNA862736	SAMN29993068	16-Klo_52-3	2016	Poland
GCA_028444325.1	animal	wildlife	stork	Microbe sample from Acinetobacter baumannii | Ciconia ciconia | cell culture |	PRJNA862736	SAMN29993067	16-Klo_50-1	2016	Poland
GCA_028444265.1	animal	wildlife	stork	Microbe sample from Acinetobacter baumannii | Ciconia ciconia | cell culture |	PRJNA862736	SAMN29993076	16-Posen_16-1	2016	Poland
GCA_028444255.1	animal	wildlife	stork	pellet | Microbe sample from Acinetobacter baumannii | Ciconia ciconia | cell culture |	PRJNA862736	SAMN29993075	16-LoW1E2-2	2016	Germany
GCA_028444245.1	animal	wildlife	stork	Microbe sample from Acinetobacter baumannii | Ciconia ciconia | cell culture |	PRJNA862736	SAMN29993069	16-Klo_61-1	2016	Poland
GCA_028444235.1	animal	wildlife	stork	Microbe sample from Acinetobacter baumannii | Ciconia ciconia | cell culture |	PRJNA862736	SAMN29993070	16-Klo_64-1	2016	Poland
GCA_028444225.1	animal	wildlife	stork	Microbe sample from Acinetobacter baumannii | Ciconia ciconia | cell culture |	PRJNA862736	SAMN29993071	16-Klo_65-1	2016	Poland
GCA_028444185.1	animal	wildlife	stork	Microbe sample from Acinetobacter baumannii | Ciconia ciconia | cell culture |	PRJNA862736	SAMN29993072	16-Klo_94-3	2016	Poland
GCA_028444175.1	animal	wildlife	stork	Microbe sample from Acinetobacter baumannii | Ciconia ciconia | cell culture |	PRJNA862736	SAMN29993073	16-Klo37-1	2016	Poland
GCA_028444165.1	animal	wildlife	stork	Microbe sample from Acinetobacter baumannii | Ciconia ciconia | cell culture |	PRJNA862736	SAMN29993074	16-Klo60-1	2016	Poland
GCA_028444105.1	animal	wildlife	stork	Microbe sample from Acinetobacter baumannii | Ciconia ciconia | cell culture |	PRJNA862736	SAMN29993077	16-Posen_4-3	2016	Poland
GCA_028444075.1	animal	wildlife	stork	Microbe sample from Acinetobacter baumannii | Ciconia ciconia | cell culture |	PRJNA862736	SAMN29993081	16-VT0593C-2	2016	Poland
GCA_028444025.1	animal	wildlife	stork	pellet | Microbe sample from Acinetobacter baumannii | Ciconia ciconia | cell culture |	PRJNA862736	SAMN29993084	16W1E15	2016	Germany
GCA_028444015.1	animal	wildlife	stork	Microbe sample from Acinetobacter baumannii | Ciconia ciconia | cell culture |	PRJNA862736	SAMN29993082	16-VT3112C-1	2016	Poland
GCA_028443985.1	animal	wildlife	stork	Microbe sample from Acinetobacter baumannii | Ciconia ciconia | cell culture |	PRJNA862736	SAMN29993086	17-13P43T-1	2017	Poland
GCA_028443975.1	animal	wildlife	stork	Microbe sample from Acinetobacter baumannii | Ciconia ciconia | cell culture |	PRJNA862736	SAMN29993083	16-VT3132T-2	2016	Poland
GCA_028443965.1	animal	wildlife	stork	Microbe sample from Acinetobacter baumannii | Ciconia ciconia | cell culture |	PRJNA862736	SAMN29993085	17-13P42T-2	2017	Poland
GCA_028443925.1	animal	wildlife	stork	Microbe sample from Acinetobacter baumannii | Ciconia ciconia | cell culture |	PRJNA862736	SAMN29993087	17-13P87T-2	2017	Poland
GCA_028443905.1	animal	wildlife	stork	Microbe sample from Acinetobacter baumannii | Ciconia ciconia | cell culture |	PRJNA862736	SAMN29993088	17-13P88K-1	2017	Poland
GCA_028443885.1	animal	wildlife	stork	Microbe sample from Acinetobacter baumannii | Ciconia ciconia | cell culture |	PRJNA862736	SAMN29993089	17-20A	2017	Poland
GCA_028443875.1	animal	wildlife	stork	Microbe sample from Acinetobacter baumannii | Ciconia ciconia | cell culture |	PRJNA862736	SAMN29993091	17-28P84D-1	2017	Poland
GCA_028443865.1	animal	wildlife	stork	Microbe sample from Acinetobacter baumannii | Ciconia ciconia | cell culture |	PRJNA862736	SAMN29993090	17-27P47D-2	2017	Poland
GCA_028443835.1	animal	wildlife	stork	Microbe sample from Acinetobacter baumannii | Ciconia ciconia | cell culture |	PRJNA862736	SAMN29993093	17-29P65D-2	2017	Poland
GCA_028443825.1	animal	wildlife	stork	Microbe sample from Acinetobacter baumannii | Ciconia ciconia | cell culture |	PRJNA862736	SAMN29993092	17-28P85_D-1	2017	Poland
GCA_028443805.1	animal	wildlife	stork	Microbe sample from Acinetobacter baumannii | Ciconia ciconia | cell culture |	PRJNA862736	SAMN29993094	17-29P66D-1	2017	Poland
GCA_028443775.1	animal	wildlife	stork	Microbe sample from Acinetobacter baumannii | Ciconia ciconia | cell culture |	PRJNA862736	SAMN29993097	17-33P28K-1	2017	Poland
GCA_028443765.1	animal	wildlife	stork	Microbe sample from Acinetobacter baumannii | Ciconia ciconia | cell culture |	PRJNA862736	SAMN29993099	17-33P28T-2	2017	Poland
GCA_028443735.1	animal	wildlife	stork	Microbe sample from Acinetobacter baumannii | Ciconia ciconia | cell culture |	PRJNA862736	SAMN29993095	17-29P70D-1	2017	Poland
GCA_028443705.1	animal	wildlife	stork	Microbe sample from Acinetobacter baumannii | Ciconia ciconia | cell culture |	PRJNA862736	SAMN29993098	17-33P28K-2	2017	Poland
GCA_028443685.1	animal	wildlife	stork	Microbe sample from Acinetobacter baumannii | Ciconia ciconia | cell culture |	PRJNA862736	SAMN29993100	17-33P31K1	2017	Poland
GCA_028443655.1	animal	wildlife	stork	Microbe sample from Acinetobacter baumannii | Ciconia ciconia | cell culture |	PRJNA862736	SAMN29993102	17-33P38T-1	2017	Poland
GCA_028443645.1	animal	wildlife	stork	Microbe sample from Acinetobacter baumannii | Ciconia ciconia | cell culture |	PRJNA862736	SAMN29993103	17-33P50T-2	2017	Poland
GCA_028443625.1	animal	wildlife	stork	Microbe sample from Acinetobacter baumannii | Ciconia ciconia | cell culture |	PRJNA862736	SAMN29993101	17-33P33T-1	2017	Poland
GCA_028443605.1	animal	wildlife	stork	Microbe sample from Acinetobacter baumannii | Ciconia ciconia | cell culture |	PRJNA862736	SAMN29993105	17-33P53T-1	2017	Poland
GCA_028443555.1	animal	wildlife	stork	Microbe sample from Acinetobacter baumannii | Ciconia ciconia | cell culture |	PRJNA862736	SAMN29993104	17-33P51T-1	2017	Poland
GCA_028443345.1	animal	wildlife	stork	Microbe sample from Acinetobacter baumannii | Ciconia ciconia | cell culture |	PRJNA862736	SAMN29993117	17-Klo21_24-1	2017	Poland
GCA_028443275.1	animal	wildlife	stork	pellet | Microbe sample from Acinetobacter baumannii | Ciconia ciconia | cell culture |	PRJNA862736	SAMN29993120	17-ODR_Czarn.101-1	2017	Poland
GCA_028443265.1	animal	wildlife	stork	Microbe sample from Acinetobacter baumannii | Ciconia ciconia | cell culture |	PRJNA862736	SAMN29993121	17-VT4711T-1	2017	Poland
GCA_028443225.1	animal	wildlife	stork	Microbe sample from Acinetobacter baumannii | Ciconia ciconia | cell culture |	PRJNA862736	SAMN29993122	17-VT4714K-1	2017	Poland
GCA_028443215.1	animal	wildlife	stork	Microbe sample from Acinetobacter baumannii | Ciconia ciconia | cell culture |	PRJNA862736	SAMN29993123	17-VT4715T-2	2017	Poland
GCA_028443205.1	animal	wildlife	stork	Microbe sample from Acinetobacter baumannii | Ciconia ciconia | cell culture |	PRJNA862736	SAMN29993124	17-VT4716K-2	2017	Poland
GCA_028443185.1	animal	wildlife	stork	Microbe sample from Acinetobacter baumannii | Ciconia ciconia | cell culture |	PRJNA862736	SAMN29993125	17-VT4895T-1	2017	Poland
GCA_028443165.1	animal	wildlife	stork	Microbe sample from Acinetobacter baumannii | Ciconia ciconia | cell culture |	PRJNA862736	SAMN29993126	17-VT4898T-1	2017	Poland
GCA_028443145.1	animal	wildlife	stork	Microbe sample from Acinetobacter baumannii | Ciconia ciconia | cell culture |	PRJNA862736	SAMN29993128	17-VT7005T-1	2017	Poland
GCA_028443125.1	animal	wildlife	stork	Microbe sample from Acinetobacter baumannii | Ciconia ciconia | cell culture |	PRJNA862736	SAMN29993127	17-VT4899T-2	2017	Poland
GCA_028443105.1	animal	wildlife	stork	Microbe sample from Acinetobacter baumannii | Ciconia ciconia | cell culture |	PRJNA862736	SAMN29993130	17-VT7014T-1	2017	Poland
GCA_028443085.1	animal	wildlife	stork	Microbe sample from Acinetobacter baumannii | Ciconia ciconia | cell culture |	PRJNA862736	SAMN29993129	17-VT7006T-1	2017	Poland
GCA_028443065.1	animal	wildlife	stork	Microbe sample from Acinetobacter baumannii | Ciconia ciconia | cell culture |	PRJNA862736	SAMN29993131	17-VT7019T-2	2017	Poland
GCA_028443035.1	animal	wildlife	stork	Microbe sample from Acinetobacter baumannii | Ciconia ciconia | cell culture |	PRJNA862736	SAMN29993132	17-VT7024T-1	2017	Poland
GCA_028442405.1	animal	wildlife	stork	Microbe sample from Acinetobacter baumannii | Ciconia ciconia | cell culture |	PRJNA862736	SAMN29993165	18-30P98L-1	2018	Poland
GCA_028442385.1	animal	wildlife	stork	Microbe sample from Acinetobacter baumannii | Ciconia ciconia | cell culture |	PRJNA862736	SAMN29993164	18-13A-3	2018	Poland
GCA_028442365.1	animal	wildlife	stork	Microbe sample from Acinetobacter baumannii | Ciconia ciconia | cell culture |	PRJNA862736	SAMN29993166	18-31P37L-2	2018	Poland
GCA_028442335.1	animal	wildlife	stork	Microbe sample from Acinetobacter baumannii | Ciconia ciconia | cell culture |	PRJNA862736	SAMN29993167	18-31P37O-2	2018	Poland
GCA_028442325.1	animal	wildlife	stork	Microbe sample from Acinetobacter baumannii | Ciconia ciconia | cell culture |	PRJNA862736	SAMN29993168	18-31P38L-3	2018	Poland
GCA_028442305.1	animal	wildlife	stork	Microbe sample from Acinetobacter baumannii | Ciconia ciconia | cell culture |	PRJNA862736	SAMN29993169	18-31P39L-2	2018	Poland
GCA_028442285.1	animal	wildlife	stork	Microbe sample from Acinetobacter baumannii | Ciconia ciconia | cell culture |	PRJNA862736	SAMN29993170	18-40A-1	2018	Poland
GCA_028442265.1	animal	wildlife	stork	Microbe sample from Acinetobacter baumannii | Ciconia ciconia | cell culture |	PRJNA862736	SAMN29993171	18-47P16L-1	2018	Poland
GCA_028442245.1	animal	wildlife	stork	Microbe sample from Acinetobacter baumannii | Ciconia ciconia | cell culture |	PRJNA862736	SAMN29993172	18-47P18L-1	2018	Poland
GCA_028442215.1	animal	wildlife	stork	Microbe sample from Acinetobacter baumannii | Ciconia ciconia | cell culture |	PRJNA862736	SAMN29993174	18-47P91L-1	2018	Poland
GCA_028442205.1	animal	wildlife	stork	Microbe sample from Acinetobacter baumannii | Ciconia ciconia | cell culture |	PRJNA862736	SAMN29993173	18-47P35L-1	2018	Poland
GCA_028442185.1	animal	wildlife	stork	Microbe sample from Acinetobacter baumannii | Ciconia ciconia | cell culture |	PRJNA862736	SAMN29993175	18-47P91L-2	2018	Poland
GCA_028442165.1	animal	wildlife	stork	Microbe sample from Acinetobacter baumannii | Ciconia ciconia | cell culture |	PRJNA862736	SAMN29993176	18-47P93L-1	2018	Poland
GCA_028442145.1	animal	wildlife	stork	Microbe sample from Acinetobacter baumannii | Ciconia ciconia | cell culture |	PRJNA862736	SAMN29993177	18-48P05L-2	2018	Poland
GCA_028442125.1	animal	wildlife	stork	Microbe sample from Acinetobacter baumannii | Ciconia ciconia | cell culture |	PRJNA862736	SAMN29993178	18-48P08L-2	2018	Poland
GCA_028442105.1	animal	wildlife	stork	Microbe sample from Acinetobacter baumannii | Ciconia ciconia | cell culture |	PRJNA862736	SAMN29993179	18-48P34O-2	2018	Poland
GCA_028442075.1	animal	wildlife	stork	Microbe sample from Acinetobacter baumannii | Ciconia ciconia | cell culture |	PRJNA862736	SAMN29993181	18-48P53O-2	2018	Poland
GCA_028442065.1	animal	wildlife	stork	Microbe sample from Acinetobacter baumannii | Ciconia ciconia | cell culture |	PRJNA862736	SAMN29993180	18-48P53L-2	2018	Poland
GCA_028442035.1	animal	wildlife	stork	Microbe sample from Acinetobacter baumannii | Ciconia ciconia | cell culture |	PRJNA862736	SAMN29993182	18-48P62L-1	2018	Poland
GCA_028442025.1	animal	wildlife	stork	Microbe sample from Acinetobacter baumannii | Ciconia ciconia | cell culture |	PRJNA862736	SAMN29993184	18-8A-2	2018	Poland
GCA_028442005.1	animal	wildlife	stork	Microbe sample from Acinetobacter baumannii | Ciconia ciconia | cell culture |	PRJNA862736	SAMN29993183	18-48P83L-2	2018	Poland
GCA_028441965.1	animal	wildlife	stork	Microbe sample from Acinetobacter baumannii | Ciconia ciconia | cell culture |	PRJNA862736	SAMN29993185	18-CSD76-1	2018	Poland
GCA_028441945.1	animal	wildlife	stork	Microbe sample from Acinetobacter baumannii | Ciconia ciconia | cell culture |	PRJNA862736	SAMN29993187	18-Klo47A1	2018	Poland
GCA_028441925.1	animal	wildlife	stork	Microbe sample from Acinetobacter baumannii | Ciconia ciconia | cell culture |	PRJNA862736	SAMN29993188	18-Klo54A1	2018	Poland
GCA_028441905.1	animal	wildlife	stork	Microbe sample from Acinetobacter baumannii | Ciconia ciconia | cell culture |	PRJNA862736	SAMN29993189	18-Mas-T3034T-1	2018	Poland
GCA_028441875.1	animal	wildlife	stork	Microbe sample from Acinetobacter baumannii | Ciconia ciconia | cell culture |	PRJNA862736	SAMN29993191	18-MOC93-1	2018	Poland
GCA_028441865.1	animal	wildlife	stork	Microbe sample from Acinetobacter baumannii | Ciconia ciconia | cell culture |	PRJNA862736	SAMN29993190	18-MasT3036T-1	2018	Poland
GCA_028441845.1	animal	wildlife	stork	Microbe sample from Acinetobacter baumannii | Ciconia ciconia | cell culture |	PRJNA862736	SAMN29993193	18-OBC4-1	2018	Poland
GCA_028441825.1	animal	wildlife	stork	pellet | Microbe sample from Acinetobacter baumannii | Ciconia ciconia | cell culture |	PRJNA862736	SAMN29993192	18-MOC94-2	2018	Poland
GCA_028441795.1	animal	wildlife	stork	Microbe sample from Acinetobacter baumannii | Ciconia ciconia | cell culture |	PRJNA862736	SAMN29993194	18-Pos1016-1	2018	Poland
GCA_028441775.1	animal	wildlife	stork	Microbe sample from Acinetobacter baumannii | Ciconia ciconia | cell culture |	PRJNA862736	SAMN29993195	18-Pos1046	2018	Poland
GCA_028441765.1	animal	wildlife	stork	Microbe sample from Acinetobacter baumannii | Ciconia ciconia | cell culture |	PRJNA862736	SAMN29993197	18-Pos1066-2	2018	Poland
GCA_028441745.1	animal	wildlife	stork	Microbe sample from Acinetobacter baumannii | Ciconia ciconia | cell culture |	PRJNA862736	SAMN29993196	18-Pos1066-1	2018	Poland
GCA_028441725.1	animal	wildlife	stork	Microbe sample from Acinetobacter baumannii | Ciconia ciconia | cell culture |	PRJNA862736	SAMN29993198	18-Pos111-1	2018	Poland
GCA_028441705.1	animal	wildlife	stork	Microbe sample from Acinetobacter baumannii | Ciconia ciconia | cell culture |	PRJNA862736	SAMN29993199	18-Pos121-2	2018	Poland
GCA_028441665.1	animal	wildlife	stork	Microbe sample from Acinetobacter baumannii | Ciconia ciconia | cell culture |	PRJNA862736	SAMN29993200	18-Pos123-2	2018	Poland
GCA_028441655.1	animal	wildlife	stork	Microbe sample from Acinetobacter baumannii | Ciconia ciconia | cell culture |	PRJNA862736	SAMN29993202	18-Pos129	2018	Poland
GCA_028441635.1	animal	wildlife	stork	Microbe sample from Acinetobacter baumannii | Ciconia ciconia | cell culture |	PRJNA862736	SAMN29993201	18-Pos127-2	2018	Poland
GCA_028441625.1	animal	wildlife	stork	Microbe sample from Acinetobacter baumannii | Ciconia ciconia | cell culture |	PRJNA862736	SAMN29993203	18-Pos131-2	2018	Poland
GCA_028441585.1	animal	wildlife	stork	Microbe sample from Acinetobacter baumannii | Ciconia ciconia | cell culture |	PRJNA862736	SAMN29993208	18-Pos57	2018	Poland
GCA_028441565.1	animal	wildlife	stork	Microbe sample from Acinetobacter baumannii | Ciconia ciconia | cell culture |	PRJNA862736	SAMN29993205	18-Pos19	2018	Poland
GCA_028441555.1	animal	wildlife	stork	Microbe sample from Acinetobacter baumannii | Ciconia ciconia | cell culture |	PRJNA862736	SAMN29993206	18-Pos200b	2018	Poland
GCA_028441545.1	animal	wildlife	stork	Microbe sample from Acinetobacter baumannii | Ciconia ciconia | cell culture |	PRJNA862736	SAMN29993204	18-Pos15-1	2018	Poland
GCA_028441525.1	animal	wildlife	stork	Microbe sample from Acinetobacter baumannii | Ciconia ciconia | cell culture |	PRJNA862736	SAMN29993207	18-Pos43	2018	Poland
GCA_028441485.1	animal	wildlife	stork	Microbe sample from Acinetobacter baumannii | Ciconia ciconia | cell culture |	PRJNA862736	SAMN29993210	18-Pos608	2018	Poland
GCA_028441475.1	animal	wildlife	stork	Microbe sample from Acinetobacter baumannii | Ciconia ciconia | cell culture |	PRJNA862736	SAMN29993212	18-Pos628-4	2018	Poland
GCA_028441465.1	animal	wildlife	stork	Microbe sample from Acinetobacter baumannii | Ciconia ciconia | cell culture |	PRJNA862736	SAMN29993216	18-Pos730	2018	Poland
GCA_028441435.1	animal	wildlife	stork	Microbe sample from Acinetobacter baumannii | Ciconia ciconia | cell culture |	PRJNA862736	SAMN29993209	18-Pos600	2018	Poland
GCA_028441425.1	animal	wildlife	stork	Microbe sample from Acinetobacter baumannii | Ciconia ciconia | cell culture |	PRJNA862736	SAMN29993211	18-Pos618-2	2018	Poland
GCA_028441405.1	animal	wildlife	stork	Microbe sample from Acinetobacter baumannii | Ciconia ciconia | cell culture |	PRJNA862736	SAMN29993214	18-Pos676	2018	Poland
GCA_028441375.1	animal	wildlife	stork	Microbe sample from Acinetobacter baumannii | Ciconia ciconia | cell culture |	PRJNA862736	SAMN29993213	18-Pos660-3	2018	Poland
GCA_028441365.1	animal	wildlife	stork	Microbe sample from Acinetobacter baumannii | Ciconia ciconia | cell culture |	PRJNA862736	SAMN29993215	18-Pos692-1	2018	Poland
GCA_028441345.1	animal	wildlife	stork	Microbe sample from Acinetobacter baumannii | Ciconia ciconia | cell culture |	PRJNA862736	SAMN29993217	18-Pos750-2	2018	Poland
GCA_028441315.1	animal	wildlife	stork	Microbe sample from Acinetobacter baumannii | Ciconia ciconia | cell culture |	PRJNA862736	SAMN29993218	18-Pos756-2	2018	Poland
GCA_028441305.1	animal	wildlife	stork	Microbe sample from Acinetobacter baumannii | Ciconia ciconia | cell culture |	PRJNA862736	SAMN29993219	18-Pos766-1	2018	Poland
GCA_028441275.1	animal	wildlife	stork	Microbe sample from Acinetobacter baumannii | Ciconia ciconia | cell culture |	PRJNA862736	SAMN29993221	18-Pos842	2018	Poland
GCA_028441265.1	animal	wildlife	stork	Microbe sample from Acinetobacter baumannii | Ciconia ciconia | cell culture |	PRJNA862736	SAMN29993220	18-Pos804-2	2018	Poland
GCA_028441245.1	animal	wildlife	stork	Microbe sample from Acinetobacter baumannii | Ciconia ciconia | cell culture |	PRJNA862736	SAMN29993222	18-T2989T-1	2018	Poland
GCA_028441215.1	animal	wildlife	stork	Microbe sample from Acinetobacter baumannii | Ciconia ciconia | cell culture |	PRJNA862736	SAMN29993224	18-T2998T-1	2018	Poland
GCA_028441205.1	animal	wildlife	stork	Microbe sample from Acinetobacter baumannii | Ciconia ciconia | cell culture |	PRJNA862736	SAMN29993223	18-T2991K-1	2018	Poland
GCA_028441185.1	animal	wildlife	stork	Microbe sample from Acinetobacter baumannii | Ciconia ciconia | cell culture |	PRJNA862736	SAMN29993225	19-121-1	2019	Poland
GCA_028441165.1	animal	wildlife	stork	Microbe sample from Acinetobacter baumannii | Ciconia ciconia | cell culture |	PRJNA862736	SAMN29993226	19-50P57O-2	2019	Poland
GCA_028441145.1	animal	wildlife	stork	Microbe sample from Acinetobacter baumannii | Ciconia ciconia | cell culture |	PRJNA862736	SAMN29993227	19-50P73O	2019	Poland
GCA_028441125.1	animal	wildlife	stork	Microbe sample from Acinetobacter baumannii | Ciconia ciconia | cell culture |	PRJNA862736	SAMN29993230	19-65P29	2019	Poland
GCA_028441105.1	animal	wildlife	stork	Microbe sample from Acinetobacter baumannii | Ciconia ciconia | cell culture |	PRJNA862736	SAMN29993228	19-63P73	2019	Poland
GCA_028441085.1	animal	wildlife	stork	Microbe sample from Acinetobacter baumannii | Ciconia ciconia | cell culture |	PRJNA862736	SAMN29993231	19-Klo102A	2019	Poland
GCA_028441065.1	animal	wildlife	stork	Microbe sample from Acinetobacter baumannii | Ciconia ciconia | cell culture |	PRJNA862736	SAMN29993229	19-64P02	2019	Poland
GCA_028441045.1	animal	wildlife	stork	Microbe sample from Acinetobacter baumannii | Ciconia ciconia | cell culture |	PRJNA862736	SAMN29993233	19-Pos108-2	2019	Poland
GCA_028441025.1	animal	wildlife	stork	Microbe sample from Acinetobacter baumannii | Ciconia ciconia | cell culture |	PRJNA862736	SAMN29993238	19-Pos128A	2019	Poland
GCA_028440995.1	animal	wildlife	stork	Microbe sample from Acinetobacter baumannii | Ciconia ciconia | cell culture |	PRJNA862736	SAMN29993232	19-Pos108-1	2019	Poland
GCA_028440985.1	animal	wildlife	stork	Microbe sample from Acinetobacter baumannii | Ciconia ciconia | cell culture |	PRJNA862736	SAMN29993235	19-Pos112-1	2019	Poland
GCA_028440965.1	animal	wildlife	stork	Microbe sample from Acinetobacter baumannii | Ciconia ciconia | cell culture |	PRJNA862736	SAMN29993236	19-Pos122	2019	Poland
GCA_028440945.1	animal	wildlife	stork	Microbe sample from Acinetobacter baumannii | Ciconia ciconia | cell culture |	PRJNA862736	SAMN29993234	19-Pos11	2019	Poland
GCA_028440925.1	animal	wildlife	stork	Microbe sample from Acinetobacter baumannii | Ciconia ciconia | cell culture |	PRJNA862736	SAMN29993237	19-Pos126	2019	Poland
GCA_028440905.1	animal	wildlife	stork	Microbe sample from Acinetobacter baumannii | Ciconia ciconia | cell culture |	PRJNA862736	SAMN29993241	19-Pos148-1	2019	Poland
GCA_028440875.1	animal	wildlife	stork	Microbe sample from Acinetobacter baumannii | Ciconia ciconia | cell culture |	PRJNA862736	SAMN29993239	19-Pos13-2	2019	Poland
GCA_028440865.1	animal	wildlife	stork	Microbe sample from Acinetobacter baumannii | Ciconia ciconia | cell culture |	PRJNA862736	SAMN29993240	19-Pos138-1	2019	Poland
GCF_029582015.1	animal	wildlife	stork	Nestling, choana | Pathogen | White Stork | unknown |	PRJNA224116	SAMN31681934	29D2	2014	Poland
GCF_028583465.1	animal	wildlife	stork	Nestling, choana | Pathogen | White Stork | unknown |	PRJNA224116	SAMN31681935	86II/2C	2013	Poland
GCF_002573895.1	animal	wildlife	stork	choana | Microbe sample from Acinetobacter baumannii | white stork | tissue sample | choana |	PRJNA224116	SAMN07236629	86II/2C	2013	Poland
GCF_002573875.1	animal	wildlife	stork	choana | Microbe sample from Acinetobacter baumannii | white stork | tissue sample | choana |	PRJNA224116	SAMN07236648	PLG9P835	2016	Poland
GCF_002573825.1	animal	wildlife	stork	Microbe sample from Acinetobacter baumannii | white stork | environmental sample |	PRJNA224116	SAMN07236643	O1D3-2	2016	Germany
GCF_002573815.1	animal	wildlife	stork	Microbe sample from Acinetobacter baumannii | white stork | environmental sample |	PRJNA224116	SAMN07236642	LoGeIst3-1	2015	Germany
GCF_002573735.1	animal	wildlife	stork	rectum | Microbe sample from Acinetobacter baumannii | white stork | tissue sample | rectum |	PRJNA224116	SAMN07236631	29R1	2014	Poland
GCF_002573725.1	animal	wildlife	stork	choana | Microbe sample from Acinetobacter baumannii | white stork | tissue sample | choana |	PRJNA224116	SAMN07236630	151/1C	2013	Poland
GCF_001693205.1	animal	wildlife	stork	Microbe sample from Acinetobacter baumannii | white stork nestling | tissue sample | choana |	PRJNA224116	SAMN05257109	31D1	2014	Poland
GCF_001693195.1	animal	wildlife	stork	Microbe sample from Acinetobacter baumannii | white stork nestling | tissue sample | choana |	PRJNA224116	SAMN05257108	29D2	2014	Poland
GCF_001693185.1	animal	wildlife	stork	Microbe sample from Acinetobacter baumannii | white stork nestling | tissue sample | choana |	PRJNA224116	SAMN05257107	8D1	2014	Poland
GCF_001693175.1	animal	wildlife	stork	Microbe sample from Acinetobacter baumannii | white stork nestling | tissue sample | rectum |	PRJNA224116	SAMN05257114	42R3	2014	Poland
GCF_001693125.1	animal	wildlife	stork	Microbe sample from Acinetobacter baumannii | white stork nestling | tissue sample | choana |	PRJNA224116	SAMN05257113	280/1C	2013	Poland
GCF_001693105.1	animal	wildlife	stork	Microbe sample from Acinetobacter baumannii | white stork nestling | tissue sample | choana |	PRJNA224116	SAMN05257110	192/2C	2013	Poland
GCA_028446515.1	animal	wildlife	stork	Microbe sample from Acinetobacter baumannii | Ciconia ciconia | cell culture |	PRJNA862736	SAMN29992958	13-150-1C	2013	Poland
GCA_028446485.1	animal	wildlife	stork	Microbe sample from Acinetobacter baumannii | Ciconia ciconia | cell culture |	PRJNA862736	SAMN29992959	13-156-2C	2013	Poland
GCA_028446465.1	animal	wildlife	stork	Microbe sample from Acinetobacter baumannii | Ciconia ciconia | cell culture |	PRJNA862736	SAMN29992960	13-268-2C	2013	Poland
GCA_028446445.1	animal	wildlife	stork	Microbe sample from Acinetobacter baumannii | Ciconia ciconia | cell culture |	PRJNA862736	SAMN29992962	13-284-2C	2013	Poland
GCA_028446415.1	animal	wildlife	stork	Microbe sample from Acinetobacter baumannii | Ciconia ciconia | cell culture |	PRJNA862736	SAMN29992963	13-291-1C	2013	Poland
GCA_028446405.1	animal	wildlife	stork	Microbe sample from Acinetobacter baumannii | Ciconia ciconia | cell culture |	PRJNA862736	SAMN29992961	13-278-3C	2013	Poland
GCA_028446385.1	animal	wildlife	stork	pellet | Microbe sample from Acinetobacter baumannii | Ciconia ciconia | cell culture |	PRJNA862736	SAMN29992965	14-1PW1	2013	Germany
GCA_028446365.1	animal	wildlife	stork	Microbe sample from Acinetobacter baumannii | Ciconia ciconia | cell culture |	PRJNA862736	SAMN29992964	13-658C	2013	Poland
GCA_028446335.1	animal	wildlife	stork	pellet | Microbe sample from Acinetobacter baumannii | Ciconia ciconia | cell culture |	PRJNA862736	SAMN29992966	14-2P2	2014	Poland
GCA_028446325.1	animal	wildlife	stork	pellet | Microbe sample from Acinetobacter baumannii | Ciconia ciconia | cell culture |	PRJNA862736	SAMN29992968	14-2PW1	2014	Poland
GCA_028446305.1	animal	wildlife	stork	pellet | Microbe sample from Acinetobacter baumannii | Ciconia ciconia | cell culture |	PRJNA862736	SAMN29992967	14-2P3	2014	Poland
GCA_028446275.1	animal	wildlife	stork	white stork nestling | Microbe sample from Acinetobacter baumannii | Ciconia ciconia | cell culture |	PRJNA862736	SAMN29992969	14-73D4	2014	Poland
GCA_028446265.1	animal	wildlife	stork	white stork nestling | Microbe sample from Acinetobacter baumannii | Ciconia ciconia | cell culture |	PRJNA862736	SAMN29992970	14-9D1	2014	Poland
GCA_028446225.1	animal	wildlife	stork	Microbe sample from Acinetobacter baumannii | Ciconia ciconia | cell culture |	PRJNA862736	SAMN29992974	15-01Po6-1	2015	Poland
GCA_028446165.1	animal	wildlife	stork	Microbe sample from Acinetobacter baumannii | Ciconia ciconia | cell culture |	PRJNA862736	SAMN29992975	15-220-51-2	2015	Poland
GCA_028446115.1	animal	wildlife	stork	Microbe sample from Acinetobacter baumannii | Ciconia ciconia | cell culture |	PRJNA862736	SAMN29992976	15-22038-1	2015	Poland
GCA_028446105.1	animal	wildlife	stork	Microbe sample from Acinetobacter baumannii | Ciconia ciconia | cell culture |	PRJNA862736	SAMN29992977	15-22059-1	2015	Poland
GCA_028446095.1	animal	wildlife	stork	Microbe sample from Acinetobacter baumannii | Ciconia ciconia | cell culture |	PRJNA862736	SAMN29992980	15-22067-2	2015	Poland
GCA_028446085.1	animal	wildlife	stork	Microbe sample from Acinetobacter baumannii | Ciconia ciconia | cell culture |	PRJNA862736	SAMN29992979	15-22064-2	2015	Poland
GCA_028446065.1	animal	wildlife	stork	Microbe sample from Acinetobacter baumannii | Ciconia ciconia | cell culture |	PRJNA862736	SAMN29992978	15-22062-1	2015	Poland
GCA_028446045.1	animal	wildlife	stork	Microbe sample from Acinetobacter baumannii | Ciconia ciconia | cell culture |	PRJNA862736	SAMN29992982	15-7P645-1	2015	Poland
GCA_028446025.1	animal	wildlife	stork	Microbe sample from Acinetobacter baumannii | Ciconia ciconia | cell culture |	PRJNA862736	SAMN29992983	15-7P645-2	2015	Poland
GCA_028445995.1	animal	wildlife	stork	Microbe sample from Acinetobacter baumannii | Ciconia ciconia | cell culture |	PRJNA862736	SAMN29992981	15-7P644-1	2015	Poland
GCA_028445975.1	animal	wildlife	stork	Microbe sample from Acinetobacter baumannii | Ciconia ciconia | cell culture |	PRJNA862736	SAMN29992985	15-7P651-1	2015	Poland
GCA_028445965.1	animal	wildlife	stork	Microbe sample from Acinetobacter baumannii | Ciconia ciconia | cell culture |	PRJNA862736	SAMN29992984	15-7P646-1	2015	Poland
GCA_028445945.1	animal	wildlife	stork	Microbe sample from Acinetobacter baumannii | Ciconia ciconia | cell culture |	PRJNA862736	SAMN29992990	15-7P830	2015	Poland
GCA_028445915.1	animal	wildlife	stork	Microbe sample from Acinetobacter baumannii | Ciconia ciconia | cell culture |	PRJNA862736	SAMN29992988	15-7P655-1	2015	Poland
GCA_028445905.1	animal	wildlife	stork	Microbe sample from Acinetobacter baumannii | Ciconia ciconia | cell culture |	PRJNA862736	SAMN29992987	15-7P653-1	2015	Poland
GCA_028445875.1	animal	wildlife	stork	Microbe sample from Acinetobacter baumannii | Ciconia ciconia | cell culture |	PRJNA862736	SAMN29992986	15-7P652-2	2015	Poland
GCA_028445865.1	animal	wildlife	stork	Microbe sample from Acinetobacter baumannii | Ciconia ciconia | cell culture |	PRJNA862736	SAMN29992989	15-7P830-2	2015	Poland
GCA_028445835.1	animal	wildlife	stork	Microbe sample from Acinetobacter baumannii | Ciconia ciconia | cell culture |	PRJNA862736	SAMN29992993	15-7P846-1	2015	Poland
GCA_028445795.1	animal	wildlife	stork	Microbe sample from Acinetobacter baumannii | Ciconia ciconia | cell culture |	PRJNA862736	SAMN29992991	15-7P833-4	2015	Poland
GCA_028440825.1	animal	wildlife	stork	Microbe sample from Acinetobacter baumannii | Ciconia ciconia | cell culture |	PRJNA862736	SAMN29993247	19-Pos188-2	2019	Poland
GCA_028440815.1	animal	wildlife	stork	Microbe sample from Acinetobacter baumannii | Ciconia ciconia | cell culture |	PRJNA862736	SAMN29993244	19-Pos160-2	2019	Poland
GCA_028440805.1	animal	wildlife	stork	Microbe sample from Acinetobacter baumannii | Ciconia ciconia | cell culture |	PRJNA862736	SAMN29993242	19-Pos157	2019	Poland
GCA_028440775.1	animal	wildlife	stork	Microbe sample from Acinetobacter baumannii | Ciconia ciconia | cell culture |	PRJNA862736	SAMN29993246	19-Pos172-1	2019	Poland
GCA_028440765.1	animal	wildlife	stork	Microbe sample from Acinetobacter baumannii | Ciconia ciconia | cell culture |	PRJNA862736	SAMN29993243	19-Pos159	2019	Poland
GCA_028440745.1	animal	wildlife	stork	Microbe sample from Acinetobacter baumannii | Ciconia ciconia | cell culture |	PRJNA862736	SAMN29993245	19-Pos168-2	2019	Poland
GCA_028440725.1	animal	wildlife	stork	Microbe sample from Acinetobacter baumannii | Ciconia ciconia | cell culture |	PRJNA862736	SAMN29993248	19-Pos209-2	2019	Poland
GCA_028439325.1	animal	wildlife	stork	Microbe sample from Acinetobacter baumannii | Ciconia ciconia | cell culture |	PRJNA862736	SAMN29993249	19-Pos213A	2019	Poland
GCA_028439305.1	animal	wildlife	stork	Microbe sample from Acinetobacter baumannii | Ciconia ciconia | cell culture |	PRJNA862736	SAMN29993250	19-Pos215	2019	Poland
GCA_028439275.1	animal	wildlife	stork	Microbe sample from Acinetobacter baumannii | Ciconia ciconia | cell culture |	PRJNA862736	SAMN29993254	19-Pos523-2	2019	Poland
GCA_028439265.1	animal	wildlife	stork	Microbe sample from Acinetobacter baumannii | Ciconia ciconia | cell culture |	PRJNA862736	SAMN29993251	19-Pos31-1	2019	Poland
GCA_028439235.1	animal	wildlife	stork	Microbe sample from Acinetobacter baumannii | Ciconia ciconia | cell culture |	PRJNA862736	SAMN29993252	19-Pos372	2019	Poland
GCA_028439225.1	animal	wildlife	stork	Microbe sample from Acinetobacter baumannii | Ciconia ciconia | cell culture |	PRJNA862736	SAMN29993253	19-Pos5-1	2019	Poland
GCA_028439205.1	animal	wildlife	stork	Microbe sample from Acinetobacter baumannii | Ciconia ciconia | cell culture |	PRJNA862736	SAMN29993255	19-Pos53A	2019	Poland
GCA_028439185.1	animal	wildlife	stork	Microbe sample from Acinetobacter baumannii | Ciconia ciconia | cell culture |	PRJNA862736	SAMN29993257	19-Pos85-3	2019	Poland
GCA_028439155.1	animal	wildlife	stork	Microbe sample from Acinetobacter baumannii | Ciconia ciconia | cell culture |	PRJNA862736	SAMN29993259	19-Spa223	2019	Spain
GCA_028439145.1	animal	wildlife	stork	Microbe sample from Acinetobacter baumannii | Ciconia ciconia | cell culture |	PRJNA862736	SAMN29993260	19-Spa315-2	2019	Spain
GCA_028439125.1	animal	wildlife	stork	Microbe sample from Acinetobacter baumannii | Ciconia ciconia | cell culture |	PRJNA862736	SAMN29993256	19-Pos71-1	2019	Poland
GCA_028439105.1	animal	wildlife	stork	Microbe sample from Acinetobacter baumannii | Ciconia ciconia | cell culture |	PRJNA862736	SAMN29993258	19-Spa185-1	2019	Spain
GCA_028439085.1	animal	wildlife	stork	Microbe sample from Acinetobacter baumannii | Ciconia ciconia | cell culture |	PRJNA862736	SAMN29993261	19-Spa420-1	2019	Spain
GCA_028439065.1	animal	wildlife	stork	Microbe sample from Acinetobacter baumannii | Ciconia ciconia | cell culture |	PRJNA862736	SAMN29993264	19-Spa466-1	2019	Spain
GCA_028439025.1	animal	wildlife	stork	Microbe sample from Acinetobacter baumannii | Ciconia ciconia | cell culture |	PRJNA862736	SAMN29993265	19-Spa519-1	2019	Spain
GCA_028439015.1	animal	wildlife	stork	Microbe sample from Acinetobacter baumannii | Ciconia ciconia | cell culture |	PRJNA862736	SAMN29993262	19-Spa428-1	2019	Spain
GCA_028439005.1	animal	wildlife	stork	Microbe sample from Acinetobacter baumannii | Ciconia ciconia | cell culture |	PRJNA862736	SAMN29993263	19-Spa428-2	2019	Spain
GCA_028438985.1	animal	wildlife	stork	Microbe sample from Acinetobacter baumannii | Ciconia ciconia | cell culture |	PRJNA862736	SAMN29993266	19-War16.2B-1	2019	Poland
GCA_028438945.1	animal	wildlife	stork	Microbe sample from Acinetobacter baumannii | Ciconia ciconia | cell culture |	PRJNA862736	SAMN29993267	19-Warm26_1B	2019	Poland
GCA_028438915.1	animal	wildlife	stork	Microbe sample from Acinetobacter baumannii | Ciconia ciconia | cell culture |	PRJNA862736	SAMN29993268	19-Warm33_2A	2019	Poland
GCF_030165035.1	animal	wildlife	turtle	blood | Pathogen | Green turtle | Osteomyelitis |	PRJNA224116	SAMN35447053	FAI132	2020	Brazil
GCF_019457715.1	animal	wildlife	wolf	urine | Pathogen | Canis lupus | Urinary Tract Infection |	PRJNA224116	SAMN19911946	40288	2015	France
GCA_028444085.1	animal	wildlife	worm	Microbe sample from Acinetobacter baumannii | Lumbricina | cell culture |	PRJNA862736	SAMN29993079	16-RewurLo-1	2016	Germany
GCA_028443545.1	animal	wildlife	worm	Microbe sample from Acinetobacter baumannii | Lumbricina | cell culture |	PRJNA862736	SAMN29993106	17-HoPe_28-1	2017	Germany
GCA_028443305.1	animal	wildlife	worm	Microbe sample from Acinetobacter baumannii | Lumbricina | cell culture |	PRJNA862736	SAMN29993118	17-Lo_13-1	2017	Germany
GCA_028443025.1	animal	wildlife	worm	Microbe sample from Acinetobacter baumannii | Lumbricina | cell culture |	PRJNA862736	SAMN29993135	17-Zw_133-2	2017	Germany
GCA_028442995.1	animal	wildlife	worm	Microbe sample from Acinetobacter baumannii | Lumbricina | cell culture |	PRJNA862736	SAMN29993133	17-ZW_108-3	2017	Germany
GCA_028442965.1	animal	wildlife	worm	Microbe sample from Acinetobacter baumannii | Lumbricina | cell culture |	PRJNA862736	SAMN29993136	17-ZW_160	2017	Germany
GCA_028442945.1	animal	wildlife	worm	Microbe sample from Acinetobacter baumannii | Lumbricina | cell culture |	PRJNA862736	SAMN29993137	17-ZW_59-1	2017	Germany
GCA_028442925.1	animal	wildlife	worm	Microbe sample from Acinetobacter baumannii | Lumbricina | cell culture |	PRJNA862736	SAMN29993138	17-ZW_61W2	2017	Germany
GCA_028442585.1	animal	wildlife	worm	Microbe sample from Acinetobacter baumannii | Lumbricina | cell culture |	PRJNA862736	SAMN29993155	17-Zw-108-1	2017	Germany
GCA_028442565.1	animal	wildlife	worm	Microbe sample from Acinetobacter baumannii | Lumbricina | cell culture |	PRJNA862736	SAMN29993157	17-Zw-56-1	2017	Germany
GCA_028442535.1	animal	wildlife	worm	Microbe sample from Acinetobacter baumannii | Lumbricina | cell culture |	PRJNA862736	SAMN29993159	17-Zw-61-Roe-1	2017	Germany
GCA_028442525.1	animal	wildlife	worm	Microbe sample from Acinetobacter baumannii | Lumbricina | cell culture |	PRJNA862736	SAMN29993156	17-Zw-108-2	2017	Germany
GCA_028442485.1	animal	wildlife	worm	Microbe sample from Acinetobacter baumannii | Lumbricina | cell culture |	PRJNA862736	SAMN29993158	17-Zw-61-1	2017	Germany
GCA_028442455.1	animal	wildlife	worm	Microbe sample from Acinetobacter baumannii | Lumbricina | cell culture |	PRJNA862736	SAMN29993162	17-ZW108-3	2017	Germany
GCA_028438925.1	animal	wildlife	worm	Microbe sample from Acinetobacter baumannii | lumbricina | cell culture |	PRJNA862736	SAMN29993269	19-Zw-33-1	2019	Germany
GCA_028438035.1	animal	wildlife	worm	Microbe sample from Acinetobacter baumannii | Lumbricina | cell culture |	PRJNA862736	SAMN29993312	U17-HoPe45	2017	Germany
GCA_028444495.1	animal	wildlife	worm	Microbe sample from Acinetobacter baumannii | Lumbricina | cell culture |	PRJNA862736	SAMN29993060	16-E-J-5	2016	Germany
GCA_028443365.1	animal	wildlife	worm	Microbe sample from Acinetobacter baumannii | Lumbricina | cell culture |	PRJNA862736	SAMN29993115	17-HoPe32	2017	Germany
GCA_028443315.1	animal	wildlife	worm	Microbe sample from Acinetobacter baumannii | Lumbricina | cell culture |	PRJNA862736	SAMN29993119	17-Lo_4-1	2017	Germany
GCA_028442975.1	animal	wildlife	worm	Microbe sample from Acinetobacter baumannii | Lumbricina | cell culture |	PRJNA862736	SAMN29993134	17-ZW_108	2017	Germany
GCA_002341705.1	environment	domestic	kitchen_counter	kitchen counter | Uncultivated Acinetobacter baumannii UBA2492 genome recovered from SRX666364 | UBA2492 | metagenomic assembly | indoor metagenome | This BioSample is a metagenomic assembly obtained from the indoor metagenome reads: SRR1532740. |	PRJNA348753	SAMN06451083	GCA_002341705.1	Missing	USA
GCF_029841815.1	environment	domestic	sink	MIGS Cultured Bacterial/Archaeal sample from Acinetobacter baumannii | Sink | Basin | surface swab |	PRJNA224116	SAMN30525265	GD03809	2018	Pakistan
GCF_029839685.1	environment	domestic	sink	MIGS Cultured Bacterial/Archaeal sample from Acinetobacter baumannii | Sink | Basin | surface swab |	PRJNA224116	SAMN30525378	GD03922	2018	Pakistan
GCF_029839705.1	environment	domestic	sink	MIGS Cultured Bacterial/Archaeal sample from Acinetobacter baumannii | Sink | Basin | surface swab |	PRJNA224116	SAMN30525379	GD03923	2018	Pakistan
GCF_029839505.1	environment	domestic	sink	MIGS Cultured Bacterial/Archaeal sample from Acinetobacter baumannii | Sink | Basin | surface swab |	PRJNA224116	SAMN30525390	GD03934	2018	Pakistan
GCF_029836615.1	environment	domestic	sink	MIGS Cultured Bacterial/Archaeal sample from Acinetobacter baumannii | Sink | Basin | surface swab |	PRJNA224116	SAMN30525524	GD04068	2018	USA
GCF_039769585.1	environment	domestic	sink	Sink Basin | Pathogen | Environmental | Acinetobacter baumannii |	PRJNA224116	SAMN40205341	Botswana-6b	2021	Botswana
GCF_039769605.1	environment	domestic	sink	Sink Basin | Pathogen | Environmental | Acinetobacter baumannii |	PRJNA224116	SAMN40205343	Botswana-90	2021	Botswana
GCF_029840315.1	environment	domestic	sink	MIGS Cultured Bacterial/Archaeal sample from Acinetobacter baumannii | Sink | Drain | surface swab |	PRJNA224116	SAMN30525347	GD03891	2018	USA
GCF_029836515.1	environment	domestic	sink	MIGS Cultured Bacterial/Archaeal sample from Acinetobacter baumannii | Sink | Drain | surface swab |	PRJNA224116	SAMN30525530	GD04074	2018	USA
GCF_039769595.1	environment	domestic	sink	Sink Plumbing Trap | Pathogen | Environmental | Acinetobacter baumannii |	PRJNA224116	SAMN40205340	Botswana-63	2021	Botswana
GCF_018883565.1	environment	environmental_isolate	outdoor_air	air | Microbe sample from Acinetobacter baumannii | missing | missing |	PRJNA224116	SAMN19605281	VRL-M19	2019	India
GCA_028447345.1	environment	environmental_isolate	outdoor_air	air sample | Microbe sample from Acinetobacter baumannii | cell culture |	PRJNA862736	SAMN29993329	U19-Zw-LK3-3	2019	Germany
GCA_028437675.1	environment	environmental_isolate	outdoor_air	air sample | Microbe sample from Acinetobacter baumannii | cell culture |	PRJNA862736	SAMN29993328	U19-Zw-LK2-3	2019	Germany
GCF_017753625.1	environment	environmental_isolate	swab	missing | Acinetobacter baumannii strain DETAB-E227, complete sequence | environment swab |	PRJNA224116	SAMN18498586	DETAB-E227	2019	China
GCF_039769465.1	environment	environmental_isolate	swab	environmental swab | Pathogen | Environmental | Acinetobacter baumannii |	PRJNA224116	SAMN40205326	Botswana-100	2021	Botswana
GCF_008000275.1	environment	environmental_isolate	undefined	Environment | Pathogen |	PRJNA224116	SAMN12206383	AB	2018	China
GCF_007113875.1	environment	environmental_isolate	undefined	Environment | Pathogen | none | none |	PRJNA224116	SAMN10618169	E0	2018	China
GCF_025854255.1	environment	environmental_isolate	undefined	ENVIRONMENT | Pathogen | missing |	PRJNA224116	SAMN30898332	1326932	2018	USA
GCF_025854235.1	environment	environmental_isolate	undefined	ENVIRONMENT | Pathogen | missing |	PRJNA224116	SAMN30898331	1326927-2	2018	USA
GCF_025854215.1	environment	environmental_isolate	undefined	ENVIRONMENT | Pathogen | missing |	PRJNA224116	SAMN30898330	1326927-1	2018	USA
GCF_025854195.1	environment	environmental_isolate	undefined	ENVIRONMENT | Pathogen | missing |	PRJNA224116	SAMN30898329	1326924-3	2018	USA
GCF_025854175.1	environment	environmental_isolate	undefined	ENVIRONMENT | Pathogen | missing |	PRJNA224116	SAMN30898328	1326924-2	2018	USA
GCF_025854155.1	environment	environmental_isolate	undefined	ENVIRONMENT | Pathogen | missing |	PRJNA224116	SAMN30898357	1326924-1	2018	USA
GCF_030188795.1	environment	environmental_isolate	undefined	environment | The Microbe sample of Acinetobacter baumannii strain 090705 | pure culture |	PRJNA224116	SAMN35536099	90705	2019	China
GCF_030188775.1	environment	environmental_isolate	undefined	environment | The Microbe sample of Acinetobacter baumannii strain 090698 | pure culture |	PRJNA224116	SAMN35536093	90698	2019	China
GCF_030188735.1	environment	environmental_isolate	undefined	environment | The Microbe sample of Acinetobacter baumannii strain 090700 | pure culture |	PRJNA224116	SAMN35536095	90700	2019	China
GCF_030188635.1	environment	environmental_isolate	undefined	environment | The Microbe sample of Acinetobacter baumannii strain 090699 | pure culture |	PRJNA224116	SAMN35536094	90699	2019	China
GCF_030188565.1	environment	environmental_isolate	undefined	environment | The Microbe sample of Acinetobacter baumannii strain 090690 | pure culture |	PRJNA224116	SAMN35536087	90690	2019	China
GCF_030188555.1	environment	environmental_isolate	undefined	environment | The Microbe sample of Acinetobacter baumannii strain 090694 | pure culture |	PRJNA224116	SAMN35536089	90694	2019	China
GCF_030188535.1	environment	environmental_isolate	undefined	environment | The Microbe sample of Acinetobacter baumannii strain 090695 | pure culture |	PRJNA224116	SAMN35536090	90695	2019	China
GCF_030188515.1	environment	environmental_isolate	undefined	environment | The Microbe sample of Acinetobacter baumannii strain 090685 | pure culture |	PRJNA224116	SAMN35536084	90685	2019	China
GCF_030188495.1	environment	environmental_isolate	undefined	environment | The Microbe sample of Acinetobacter baumannii strain 090686 | pure culture |	PRJNA224116	SAMN35536085	90686	2019	China
GCF_030188475.1	environment	environmental_isolate	undefined	environment | The Microbe sample of Acinetobacter baumannii strain 090701 | pure culture |	PRJNA224116	SAMN35536096	90701	2019	China
GCF_030188455.1	environment	environmental_isolate	undefined	environment | The Microbe sample of Acinetobacter baumannii strain 090697 | pure culture |	PRJNA224116	SAMN35536092	90697	2019	China
GCF_030188435.1	environment	environmental_isolate	undefined	environment | The Microbe sample of Acinetobacter baumannii strain 090693 | pure culture |	PRJNA224116	SAMN35536088	90693	2019	China
GCF_030188415.1	environment	environmental_isolate	undefined	environment | The Microbe sample of Acinetobacter baumannii strain 090696 | pure culture |	PRJNA224116	SAMN35536091	90696	2019	China
GCF_030188385.1	environment	environmental_isolate	undefined	environment | The Microbe sample of Acinetobacter baumannii strain 090688 | pure culture |	PRJNA224116	SAMN35536086	90688	2019	China
GCF_030188365.1	environment	environmental_isolate	undefined	environment | The Microbe sample of Acinetobacter baumannii strain 090703 | pure culture |	PRJNA224116	SAMN35536097	90703	2019	China
GCF_030188355.1	environment	environmental_isolate	undefined	environment | The Microbe sample of Acinetobacter baumannii strain 090704 | pure culture |	PRJNA224116	SAMN35536098	90704	2019	China
GCF_009710715.1	environment	environmental_isolate	undefined	Enviromental | Microbe sample from Acinetobacter baumannii | missing |	PRJNA224116	SAMN13229280	RADAR24	2018	Romania
GCF_013140365.1	environment	environmental_isolate	undefined	environmental isolate | Microbe sample from Acinetobacter baumannii | cell culture |	PRJNA224116	SAMN14381864	S14	2019	Croatia
GCF_013140355.1	environment	environmental_isolate	undefined	environmental isolate | Microbe sample from Acinetobacter baumannii | cell culture |	PRJNA224116	SAMN14381702	EF32	2019	Croatia
GCF_013140315.1	environment	environmental_isolate	undefined	environmental isolate | Microbe sample from Acinetobacter baumannii | cell culture |	PRJNA224116	SAMN14381460	EF7	2019	Croatia
GCF_013140305.1	environment	environmental_isolate	undefined	environmental isolate | Microbe sample from Acinetobacter baumannii | cell culture |	PRJNA224116	SAMN14381701	EF31	2019	Croatia
GCF_013140295.1	environment	environmental_isolate	undefined	environmental isolate | Microbe sample from Acinetobacter baumannii | cell culture |	PRJNA224116	SAMN14381342	S2/10	2019	Croatia
GCF_013140275.1	environment	environmental_isolate	undefined	environmental isolate | Microbe sample from Acinetobacter baumannii | cell culture |	PRJNA224116	SAMN14381341	S2/4	2019	Croatia
GCF_013140255.1	environment	environmental_isolate	undefined	environmental isolate | Microbe sample from Acinetobacter baumannii | cell culture |	PRJNA224116	SAMN14381340	S2/2	2019	Croatia
GCF_017939285.1	environment	environmental_isolate	undefined	environment | Microbe sample from Acinetobacter baumannii | whole organism |	PRJNA224116	SAMN18628960	MarinaZ4	2018	Singapore
GCF_030131565.1	environment	soil	chicken_manure_grass	Grass with Chicken Manure | Pathogen | Not applicable | Not applicable |	PRJNA224116	SAMN31927121	GP T1 LAM CEF 4	2019	Ireland
GCF_030131525.1	environment	soil	chicken_manure_grass	Grass with Chicken Manure | Pathogen | Not applicable | Not applicable |	PRJNA224116	SAMN31927123	GP T3 SC CEF 1	2019	Ireland
GCF_030131485.1	environment	soil	chicken_manure_grass	Grass with Chicken Manure | Pathogen | Not applicable | Not applicable |	PRJNA224116	SAMN31927126	GP T1 EMB CEF 1	2019	Ireland
GCF_030131425.1	environment	soil	chicken_manure_grass	Grass with Chicken Manure | Pathogen | Not applicable | Not applicable |	PRJNA224116	SAMN31927127	GP T1 EMB CEF 6	2019	Ireland
GCF_030131385.1	environment	soil	chicken_manure_grass	Grass with Chicken Manure | Pathogen | Not applicable | Not applicable |	PRJNA224116	SAMN31927134	GP T1 SC CEF 4	2019	Ireland
GCF_030131365.1	environment	soil	chicken_manure_grass	Grass with Chicken Manure | Pathogen | Not applicable | Not applicable |	PRJNA224116	SAMN31927131	GP T1 EMB CEF 4	2019	Ireland
GCF_030131305.1	environment	soil	chicken_manure_grass	Grass with Chicken Manure | Pathogen | Not applicable | Not applicable |	PRJNA224116	SAMN31927136	GP T1 LAM CEF 2	2019	Ireland
GCF_030131265.1	environment	soil	chicken_manure_grass	Grass with Chicken Manure | Pathogen | Not applicable | Not applicable |	PRJNA224116	SAMN31927137	GP T1 LAM CEF 5	2019	Ireland
GCF_030131245.1	environment	soil	chicken_manure_grass	Grass with Chicken Manure | Pathogen | Not applicable | Not applicable |	PRJNA224116	SAMN31927138	GP T1 LAM CEF 3	2019	Ireland
GCF_030131145.1	environment	soil	chicken_manure_grass	Grass with Chicken Manure | Pathogen | Not applicable | Not applicable |	PRJNA224116	SAMN31927141	GP T1 LAM CEF 1	2019	Ireland
GCF_030131105.1	environment	soil	chicken_manure_grass	Grass with Chicken Manure | Pathogen | Not applicable | Not applicable |	PRJNA224116	SAMN31927143	GP T1 SC CEF 3	2019	Ireland
GCF_030130985.1	environment	soil	chicken_manure_grass	Grass with Chicken Manure | Pathogen | Not applicable | Not applicable |	PRJNA224116	SAMN31927150	GP T3 EMB COL 1	2019	Ireland
GCF_030130955.1	environment	soil	chicken_manure_grass	Grass with Chicken Manure | Pathogen | Not applicable | Not applicable |	PRJNA224116	SAMN31927152	GP T3 LAM CEF 4	2019	Ireland
GCF_030130895.1	environment	soil	chicken_manure_grass	Grass with Chicken Manure | Pathogen | Not applicable | Not applicable |	PRJNA224116	SAMN31927156	GP T3 LAM CEF 3	2019	Ireland
GCF_030130785.1	environment	soil	chicken_manure_grass	Grass with Chicken Manure | Pathogen | Not applicable | Not applicable |	PRJNA224116	SAMN31927160	GP T1 EMB CEF 3	2019	Ireland
GCF_030130765.1	environment	soil	chicken_manure_grass	Grass with Chicken Manure | Pathogen | Not applicable | Not applicable |	PRJNA224116	SAMN31927161	GP T3 LAM CEF 1	2019	Ireland
GCF_030130735.1	environment	soil	chicken_manure_grass	Grass with Chicken Manure | Pathogen | Not applicable | Not applicable |	PRJNA224116	SAMN31927162	GP T3 LAM CEF 2	2019	Ireland
GCF_030130725.1	environment	soil	chicken_manure_grass	Grass with Chicken Manure | Pathogen | Not applicable | Not applicable |	PRJNA224116	SAMN31927163	GP T1 EMB CEF 5	2019	Ireland
GCF_039658655.1	environment	soil	contaminated_soil	contamined soil | Microbe sample from Acinetobacter baumannii | contamined soil |	PRJNA224116	SAMN30674678	BD122	2019	Brazil
GCF_030131195.1	environment	soil	cow_manure_grass	Grass with Cow Manure | Pathogen | Not applicable | Not applicable |	PRJNA224116	SAMN31927148	GB T3 EMB CEF 1	2019	Ireland
GCF_030131065.1	environment	soil	cow_manure_grass	Grass with Cow Manure | Pathogen | Not applicable | Not applicable |	PRJNA224116	SAMN31927146	GB T3 LAM CEF 2	2019	Ireland
GCF_030131045.1	environment	soil	cow_manure_grass	Grass with Cow Manure | Pathogen | Not applicable | Not applicable |	PRJNA224116	SAMN31927147	GB T3 LAM CEF 6	2019	Ireland
GCF_030131025.1	environment	soil	cow_manure_grass	Grass with Cow Manure | Pathogen | Not applicable | Not applicable |	PRJNA224116	SAMN31927149	GB T3 LAM CEF 5	2019	Ireland
GCF_030131005.1	environment	soil	cow_manure_grass	Grass with Cow Manure | Pathogen | Not applicable | Not applicable |	PRJNA224116	SAMN31927151	GB T3 LAM CEF 1	2019	Ireland
GCF_030130935.1	environment	soil	cow_manure_grass	Grass with Cow Manure | Pathogen | Not applicable | Not applicable |	PRJNA224116	SAMN31927154	GB T3 LAM CIPRO 4	2019	Ireland
GCF_030130925.1	environment	soil	cow_manure_grass	Grass with Cow Manure | Pathogen | Not applicable | Not applicable |	PRJNA224116	SAMN31927153	GB T3 EMB CEF 2	2019	Ireland
GCF_030130885.1	environment	soil	cow_manure_grass	Grass with Cow Manure | Pathogen | Not applicable | Not applicable |	PRJNA224116	SAMN31927155	GB T3 LAM COL 1	2019	Ireland
GCF_030130825.1	environment	soil	cow_manure_grass	Grass with Cow Manure | Pathogen | Not applicable | Not applicable |	PRJNA224116	SAMN31927158	GB T1 SC CEF 1	2019	Ireland
GCF_030130545.1	environment	soil	chicken_manure_grass	Grass with Chicken Manure | Pathogen | Not applicable | Not applicable |	PRJNA224116	SAMN31927171	GP T1 EMB CEF 2	2019	Ireland
GCF_030129955.1	environment	soil	chicken_manure_grass	Grass with Chicken Manure | Pathogen | Not applicable | Not applicable |	PRJNA224116	SAMN31927175	GP T3 LAM COL 3	2019	Ireland
GCF_030129905.1	environment	soil	chicken_manure_grass	Grass with Chicken Manure | Pathogen | Not applicable | Not applicable |	PRJNA224116	SAMN31927180	GP T1 LAM CEF 6	2019	Ireland
GCF_030129885.1	environment	soil	chicken_manure_grass	Grass with Chicken Manure | Pathogen | Not applicable | Not applicable |	PRJNA224116	SAMN31927179	GP T3 LAM COL 2	2019	Ireland
GCF_030130045.1	environment	soil	pig_manure_grass	Grass with Pig Manure | Pathogen | Not applicable | Not applicable |	PRJNA224116	SAMN31927172	GS T1 EMB CEF 1	2019	Ireland
GCF_000341985.1	environment	soil	mangrove_soil	mangrove soil | Sample from Acinetobacter baumannii MSP4-16 |	PRJNA224116	SAMN02469980	MSP4-16	2010	India
GCF_030130555.1	environment	soil	no_manure_grass	Background Grass (no manure on field) | Pathogen | Not applicable | Not applicable |	PRJNA224116	SAMN31927173	G2 EMB CEF 7	2019	Ireland
GCF_030130025.1	environment	soil	no_manure_grass	Background Grass (no manure on field) | Pathogen | Not applicable | Not applicable |	PRJNA224116	SAMN31927174	G2 EMB CEF 6	2019	Ireland
GCF_030129925.1	environment	soil	no_manure_grass	Background Grass (no manure on field) | Pathogen | Not applicable | Not applicable |	PRJNA224116	SAMN31927177	G2 BM LAM CEF 3	2019	Ireland
GCF_030131505.1	environment	soil	no_manure_grass	Background Grass (no manure on field) | Pathogen | Not applicable | Not applicable |	PRJNA224116	SAMN31927125	G2 BM SC CEF 6	2019	Ireland
GCF_030131465.1	environment	soil	no_manure_grass	Background Grass (no manure on field) | Pathogen | Not applicable | Not applicable |	PRJNA224116	SAMN31927132	G2 BM LAM CEF 4	2019	Ireland
GCF_030131405.1	environment	soil	no_manure_grass	Background Grass (no manure on field) | Pathogen | Not applicable | Not applicable |	PRJNA224116	SAMN31927129	G2 BM LAM CEF 5	2019	Ireland
GCF_030131345.1	environment	soil	no_manure_grass	Background Grass (no manure on field) | Pathogen | Not applicable | Not applicable |	PRJNA224116	SAMN31927130	G2 BM SC CEF 3	2019	Ireland
GCF_030131325.1	environment	soil	no_manure_grass	Background Grass (no manure on field) | Pathogen | Not applicable | Not applicable |	PRJNA224116	SAMN31927133	G2 BM SC CEF 5	2019	Ireland
GCF_030131285.1	environment	soil	no_manure_grass	Background Grass (no manure on field) | Pathogen | Not applicable | Not applicable |	PRJNA224116	SAMN31927135	G2 BM LAM CEF 2	2019	Ireland
GCF_030130665.1	environment	soil	no_manure_grass	Background Grass (no manure on field) | Pathogen | Not applicable | Not applicable |	PRJNA224116	SAMN31927168	G2 BM LAM CEF 1	2019	Ireland
GCF_030130005.1	environment	soil	no_manure_grass	Control Grass (No Manure) | Pathogen | Not applicable | Not applicable |	PRJNA224116	SAMN31927178	GC T3 SC CEF 1	2019	Ireland
GCF_030129975.1	environment	soil	no_manure_grass	Control Grass (No Manure) | Pathogen | Not applicable | Not applicable |	PRJNA224116	SAMN31927176	GC T1 EMB CEF 4	2019	Ireland
GCF_030131625.1	environment	soil	no_manure_grass	Control Grass (No Manure) | Pathogen | Not applicable | Not applicable |	PRJNA224116	SAMN31927124	GC T1 SC CEF 1	2019	Ireland
GCF_030131545.1	environment	soil	no_manure_grass	Control Grass (No Manure) | Pathogen | Not applicable | Not applicable |	PRJNA224116	SAMN31927122	GC T1 LAM CEF 6	2019	Ireland
GCF_030131445.1	environment	soil	no_manure_grass	Control Grass (No Manure) | Pathogen | Not applicable | Not applicable |	PRJNA224116	SAMN31927128	GC T1 LAM CEF 4	2019	Ireland
GCF_030131225.1	environment	soil	no_manure_grass	Control Grass (No Manure) | Pathogen | Not applicable | Not applicable |	PRJNA224116	SAMN31927139	GC T1 LAM CEF 2	2019	Ireland
GCF_030131185.1	environment	soil	no_manure_grass	Control Grass (No Manure) | Pathogen | Not applicable | Not applicable |	PRJNA224116	SAMN31927144	GC T1 EMB CEF 3	2019	Ireland
GCF_030131085.1	environment	soil	no_manure_grass	Control Grass (No Manure) | Pathogen | Not applicable | Not applicable |	PRJNA224116	SAMN31927145	GC T1 EMB CEF 2	2019	Ireland
GCF_030130865.1	environment	soil	no_manure_grass	Control Grass (No Manure) | Pathogen | Not applicable | Not applicable |	PRJNA224116	SAMN31927157	GC T1 EMB CEF 1	2019	Ireland
GCF_030130845.1	environment	soil	no_manure_grass	Control Grass (No Manure) | Pathogen | Not applicable | Not applicable |	PRJNA224116	SAMN31927164	GC T1 LAM CEF 1	2019	Ireland
GCF_030130795.1	environment	soil	no_manure_grass	Control Grass (No Manure) | Pathogen | Not applicable | Not applicable |	PRJNA224116	SAMN31927159	GC T1 SC CEF 4	2019	Ireland
GCF_030130695.1	environment	soil	no_manure_grass	Control Grass (No Manure) | Pathogen | Not applicable | Not applicable |	PRJNA224116	SAMN31927166	GC T1 SC CEF 3	2019	Ireland
GCF_030130645.1	environment	soil	no_manure_grass	Control Grass (No Manure) | Pathogen | Not applicable | Not applicable |	PRJNA224116	SAMN31927167	GC T1 SC CEF 2	2019	Ireland
GCF_030130605.1	environment	soil	no_manure_grass	Control Grass (No Manure) | Pathogen | Not applicable | Not applicable |	PRJNA224116	SAMN31927169	GC T1 LAM CEF 3	2019	Ireland
GCF_030130585.1	environment	soil	no_manure_grass	Control Grass (No Manure) | Pathogen | Not applicable | Not applicable |	PRJNA224116	SAMN31927170	GC T1 LAM CEF 5	2019	Ireland
GCF_030131585.1	environment	soil	pig_manure_grass	Grass with Pig Manure | Pathogen | Not applicable | Not applicable |	PRJNA224116	SAMN31927120	GS T1 EMB CEF 4	2019	Ireland
GCF_030131155.1	environment	soil	pig_manure_grass	Grass with Pig Manure | Pathogen | Not applicable | Not applicable |	PRJNA224116	SAMN31927140	GS T1 EMB CEF 6	2019	Ireland
GCF_030131125.1	environment	soil	pig_manure_grass	Grass with Pig Manure | Pathogen | Not applicable | Not applicable |	PRJNA224116	SAMN31927142	GS T1 EMB CEF 2	2019	Ireland
GCF_030130685.1	environment	soil	pig_manure_grass	Grass with Pig Manure | Pathogen | Not applicable | Not applicable |	PRJNA224116	SAMN31927165	GS T1 EMB CEF 5	2019	Ireland
GCF_041930545.1	environment	soil	rhizosphere_soil	rhizosphere soil | Microbe sample from Acinetobacter baumannii | Single cell |	PRJNA224116	SAMN43543506	H3	2023	China
GCF_025246225.1	environment	soil	semi_pristine_soil	soil | Pathogen | Soil | semi pristine env | swab of surface |	PRJNA224116	SAMN30755286	IY-BUK3	2021	Nigeria
GCF_045985605.1	environment	soil	soil_sample	soil | One Health Enteric sample from Acinetobacter baumannii | soil | Environmental surveillance | environmental |	PRJNA224116	SAMN44655149	A23-4	2024	Nigeria
GCF_045985545.1	environment	soil	soil_sample	soil | One Health Enteric sample from Acinetobacter baumannii | soil | Environmental surveillance | environmental |	PRJNA224116	SAMN44655150	A24-1	2024	Nigeria
GCF_045985525.1	environment	soil	soil_sample	soil | One Health Enteric sample from Acinetobacter baumannii | soil | Environmental surveillance | environmental |	PRJNA224116	SAMN44655154	A27-6	2024	Nigeria
GCF_045985465.1	environment	soil	soil_sample	soil | One Health Enteric sample from Acinetobacter baumannii | soil | Environmental surveillance | environmental |	PRJNA224116	SAMN44655153	A27-2	2024	Nigeria
GCF_045985435.1	environment	soil	soil_sample	soil | One Health Enteric sample from Acinetobacter baumannii | soil | Environmental surveillance | environmental |	PRJNA224116	SAMN44655151	A26-1	2024	Nigeria
GCF_045985425.1	environment	soil	soil_sample	soil | One Health Enteric sample from Acinetobacter baumannii | soil | Environmental surveillance | environmental |	PRJNA224116	SAMN44655152	A26-4	2024	Nigeria
GCA_028438205.1	environment	soil	soil_sample	soil | Microbe sample from Acinetobacter baumannii | cell culture |	PRJNA862736	SAMN29993305	U17-HaSW-S1-3	2017	Germany
GCA_028438085.1	environment	soil	soil_sample	soil | Microbe sample from Acinetobacter baumannii | cell culture |	PRJNA862736	SAMN29993311	U17-HoPe-S1-1	2017	Germany
GCA_028438025.1	environment	soil	soil_sample	soil | Microbe sample from Acinetobacter baumannii | cell culture |	PRJNA862736	SAMN29993314	U17-HoPeS16-1	2017	Germany
GCA_028438005.1	environment	soil	soil_sample	soil | Microbe sample from Acinetobacter baumannii | cell culture |	PRJNA862736	SAMN29993315	U17-ZWS21.4-2	2017	Germany
GCA_028437985.1	environment	soil	soil_sample	soil | Microbe sample from Acinetobacter baumannii | cell culture |	PRJNA862736	SAMN29993316	U17-ZWS24.1-1	2017	Germany
GCA_028437955.1	environment	soil	soil_sample	soil | Microbe sample from Acinetobacter baumannii | cell culture |	PRJNA862736	SAMN29993320	U18-HoPe-S13-1	2018	Germany
GCA_028437945.1	environment	soil	soil_sample	soil | Microbe sample from Acinetobacter baumannii | cell culture |	PRJNA862736	SAMN29993318	U18-HoPe-P16-1	2018	Germany
GCA_028437925.1	environment	soil	soil_sample	soil | Microbe sample from Acinetobacter baumannii | cell culture |	PRJNA862736	SAMN29993317	U17SmaS1-1	2017	Germany
GCA_028437905.1	environment	soil	soil_sample	soil | Microbe sample from Acinetobacter baumannii | cell culture |	PRJNA862736	SAMN29993319	U18-HoPe-S11-1	2018	Germany
GCA_028437885.1	environment	soil	soil_sample	soil | Microbe sample from Acinetobacter baumannii | cell culture |	PRJNA862736	SAMN29993325	U19-StiWa-S2-1	2019	Germany
GCA_028437865.1	environment	soil	soil_sample	soil | Microbe sample from Acinetobacter baumannii | cell culture |	PRJNA862736	SAMN29993321	U18-HoPe-S14-1	2018	Germany
GCA_028437845.1	environment	soil	soil_sample	soil | Microbe sample from Acinetobacter baumannii | cell culture |	PRJNA862736	SAMN29993322	U18-HoPeS21.1	2018	Germany
GCA_028437825.1	environment	soil	soil_sample	soil | Microbe sample from Acinetobacter baumannii | cell culture |	PRJNA862736	SAMN29993324	U19-HoPe-S40-3	2019	Germany
GCA_028437805.1	environment	soil	soil_sample	soil | Microbe sample from Acinetobacter baumannii | cell culture |	PRJNA862736	SAMN29993323	U19-HoPe-P28-1	2019	Germany
GCA_028437775.1	environment	soil	soil_sample	soil | Microbe sample from Acinetobacter baumannii | cell culture |	PRJNA862736	SAMN29993327	U19-StiWaS1-1	2019	Germany
GCA_028437765.1	environment	soil	soil_sample	soil | Microbe sample from Acinetobacter baumannii | cell culture |	PRJNA862736	SAMN29993326	U19-StiWa-S4-1	2019	Germany
GCA_003012895.3	environment	soil	soil_sample	soil | Whole genome sequencing of Acinetobacter baumannii DS002 | Whole organism |	PRJNA437037	SAMN08637743	DS002	2005	India
GCF_019903195.1	environment	soil	soil_sample	field soil | Pathogen |	PRJNA224116	SAMN15646562	10_3	Missing	USA
GCF_019903175.1	environment	soil	soil_sample	field soil | Pathogen |	PRJNA224116	SAMN15646563	10_4	Missing	USA
GCF_045985345.1	environment	soil	soil_sample	soil | One Health Enteric sample from Acinetobacter baumannii | soil | Environmental surveillance | environmental |	PRJNA224116	SAMN44655155	A2_3	2024	Nigeria
GCF_045985285.1	environment	soil	soil_sample	soil | One Health Enteric sample from Acinetobacter baumannii | soil | Environmental surveillance | environmental |	PRJNA224116	SAMN44655156	B1-3	2024	Nigeria
GCF_045985245.1	environment	soil	soil_sample	soil | One Health Enteric sample from Acinetobacter baumannii | soil | Environmental surveillance | environmental |	PRJNA224116	SAMN44655158	B12-3	2024	Nigeria
GCF_045985225.1	environment	soil	soil_sample	soil | One Health Enteric sample from Acinetobacter baumannii | soil | Environmental surveillance | environmental |	PRJNA224116	SAMN44655157	B12-1	2024	Nigeria
GCF_045985145.1	environment	soil	soil_sample	soil | One Health Enteric sample from Acinetobacter baumannii | soil | Environmental surveillance | environmental |	PRJNA224116	SAMN44655159	B14_2	2024	Nigeria
GCF_045985125.1	environment	soil	soil_sample	soil | One Health Enteric sample from Acinetobacter baumannii | soil | Environmental surveillance | environmental |	PRJNA224116	SAMN44655160	B17-1	2024	Nigeria
GCF_045985055.1	environment	soil	soil_sample	soil | One Health Enteric sample from Acinetobacter baumannii | soil | Environmental surveillance | environmental |	PRJNA224116	SAMN44655164	C1-2	2024	Nigeria
GCF_045985025.1	environment	soil	soil_sample	soil | One Health Enteric sample from Acinetobacter baumannii | soil | Environmental surveillance | environmental |	PRJNA224116	SAMN44655161	B22-2	2024	Nigeria
GCF_045984965.1	environment	soil	soil_sample	soil | One Health Enteric sample from Acinetobacter baumannii | soil | Environmental surveillance | environmental |	PRJNA224116	SAMN44655163	B22_3	2024	Nigeria
GCF_045984945.1	environment	soil	soil_sample	soil | One Health Enteric sample from Acinetobacter baumannii | soil | Environmental surveillance | environmental |	PRJNA224116	SAMN44655165	C2-3	2024	Nigeria
GCF_045984905.1	environment	soil	soil_sample	soil | One Health Enteric sample from Acinetobacter baumannii | soil | Environmental surveillance | environmental |	PRJNA224116	SAMN44655167	C3-2	2024	Nigeria
GCF_045984865.1	environment	soil	soil_sample	soil | One Health Enteric sample from Acinetobacter baumannii | soil | Environmental surveillance | environmental |	PRJNA224116	SAMN44655166	C3-1	2024	Nigeria
GCF_045984825.1	environment	soil	soil_sample	soil | One Health Enteric sample from Acinetobacter baumannii | soil | Environmental surveillance | environmental |	PRJNA224116	SAMN44655168	C3_4	2024	Nigeria
GCF_045984785.1	environment	soil	soil_sample	soil | One Health Enteric sample from Acinetobacter baumannii | soil | Environmental surveillance | environmental |	PRJNA224116	SAMN44655169	C6-4	2024	Nigeria
GCF_045984705.1	environment	soil	soil_sample	soil | One Health Enteric sample from Acinetobacter baumannii | soil | Environmental surveillance | environmental |	PRJNA224116	SAMN44655173	C7-2	2024	Nigeria
GCF_045984675.1	environment	soil	soil_sample	soil | One Health Enteric sample from Acinetobacter baumannii | soil | Environmental surveillance | environmental |	PRJNA224116	SAMN44655171	C6_3	2024	Nigeria
GCF_045984645.1	environment	soil	soil_sample	soil | One Health Enteric sample from Acinetobacter baumannii | soil | Environmental surveillance | environmental |	PRJNA224116	SAMN44655172	C7-1	2024	Nigeria
GCF_045984625.1	environment	soil	soil_sample	soil | One Health Enteric sample from Acinetobacter baumannii | soil | Environmental surveillance | environmental |	PRJNA224116	SAMN44655170	C6_2	2024	Nigeria
GCF_045345925.1	environment	soil	soil_sample	soil | MIGS Cultured Bacterial/Archaeal sample from Acinetobacter baumannii | soil | soil | soil |	PRJNA224116	SAMN40518041	HAU425	2021	China
GCF_022014125.1	environment	soil	soil_sample	soil sample | Microbe sample from Acinetobacter baumannii | Soil sample |	PRJNA224116	SAMN17319840	NI65	2016	Thailand
GCF_008632635.1	environment	soil	soil_sample	soil | Pathogen |	PRJNA224116	SAMN12769618	K09-14	2017	Malaysia
GCF_004912245.1	environment	soil	soil_sample	soil | Microbe sample from Acinetobacter baumannii | Cell culture |	PRJNA224116	SAMN11458716	SCPM-O-B-8557(136)	2013	Russia
GCA_028447855.1	environment	soil	soil_sample	soil | Microbe sample from Acinetobacter baumannii | cell culture |	PRJNA862736	SAMN30078459	U19-Zw-S16-1	2019	Germany
GCA_028447845.1	environment	soil	soil_sample	soil | Microbe sample from Acinetobacter baumannii | cell culture |	PRJNA862736	SAMN30078458	U19-Zw-S15-1	2019	Germany
GCA_028447815.1	environment	soil	soil_sample	soil | Microbe sample from Acinetobacter baumannii | cell culture |	PRJNA862736	SAMN30078460	U19-Zw-S21-1	2019	Germany
GCA_028447805.1	environment	soil	soil_sample	soil | Microbe sample from Acinetobacter baumannii | cell culture |	PRJNA862736	SAMN30078461	U19-Zw-S22-1	2019	Germany
GCA_028447785.1	environment	soil	soil_sample	soil | Microbe sample from Acinetobacter baumannii | cell culture |	PRJNA862736	SAMN30078462	U19-Zw-S30-1	2019	Germany
GCA_028447765.1	environment	soil	soil_sample	soil | Microbe sample from Acinetobacter baumannii | cell culture |	PRJNA862736	SAMN30078464	U19-Zw-S37-1	2019	Germany
GCA_028447745.1	environment	soil	soil_sample	soil | Microbe sample from Acinetobacter baumannii | cell culture |	PRJNA862736	SAMN30078463	U19-Zw-S30-2	2019	Germany
GCA_028447715.1	environment	soil	soil_sample	soil | Microbe sample from Acinetobacter baumannii | cell culture |	PRJNA862736	SAMN30078465	U19-Zw-S49-1	2019	Germany
GCA_028447705.1	environment	soil	soil_sample	soil | Microbe sample from Acinetobacter baumannii | cell culture |	PRJNA862736	SAMN30078466	U19-Zw-S7.1-1	2019	Germany
GCA_028447685.1	environment	soil	soil_sample	soil | Microbe sample from Acinetobacter baumannii | cell culture |	PRJNA862736	SAMN30078467	U19-Zw-S7.2-1	2019	Germany
GCA_028447655.1	environment	soil	soil_sample	soil | Microbe sample from Acinetobacter baumannii | cell culture |	PRJNA862736	SAMN30078468	U19-Zw-S7.5-1	2019	Germany
GCA_028447645.1	environment	soil	soil_sample	soil | Microbe sample from Acinetobacter baumannii | cell culture |	PRJNA862736	SAMN30078469	U19-Zw-S7.7-1	2019	Germany
GCA_028447625.1	environment	soil	soil_sample	soil | Microbe sample from Acinetobacter baumannii | cell culture |	PRJNA862736	SAMN30078471	U19-Zw-S8-1	2019	Germany
GCA_028447595.1	environment	soil	soil_sample	soil | Microbe sample from Acinetobacter baumannii | cell culture |	PRJNA862736	SAMN30078472	U19-ZWS7.4-3	2019	Germany
GCA_028447585.1	environment	soil	soil_sample	soil | Microbe sample from Acinetobacter baumannii | cell culture |	PRJNA862736	SAMN30078470	U19-Zw-S7.8-2	2019	Germany
GCA_028447525.1	environment	soil	soil_sample	soil | Microbe sample from Acinetobacter baumannii | cell culture |	PRJNA862736	SAMN30078476	U20-Benz-S21-1	2020	Germany
GCA_028447505.1	environment	soil	soil_sample	soil | Microbe sample from Acinetobacter baumannii | cell culture |	PRJNA862736	SAMN30078475	U20-Benz-S18-1	2020	Germany
GCA_028447485.1	environment	soil	soil_sample	soil | Microbe sample from Acinetobacter baumannii | cell culture |	PRJNA862736	SAMN30078477	U20-Benz-S21-4	2020	Germany
GCA_028447455.1	environment	soil	soil_sample	soil | Microbe sample from Acinetobacter baumannii | cell culture |	PRJNA862736	SAMN30078478	U20-Benz-S24-2	2020	Germany
GCA_028447445.1	environment	soil	soil_sample	soil | Microbe sample from Acinetobacter baumannii | cell culture |	PRJNA862736	SAMN30078481	U20-HoPe-S30-1	2020	Germany
GCA_028447425.1	environment	soil	soil_sample	soil | Microbe sample from Acinetobacter baumannii | cell culture |	PRJNA862736	SAMN30078479	U20-Benz-S24-4	2020	Germany
GCA_028447405.1	environment	soil	soil_sample	soil | Microbe sample from Acinetobacter baumannii | cell culture |	PRJNA862736	SAMN30078480	U20-Benz-S6-1	2020	Germany
GCA_028447385.1	environment	soil	soil_sample	soil | Microbe sample from Acinetobacter baumannii | cell culture |	PRJNA862736	SAMN30078482	U20-Zw-S26-1	2020	Germany
GCA_028447305.1	environment	soil	soil_sample	soil | Microbe sample from Acinetobacter baumannii | cell culture |	PRJNA862736	SAMN30078483	U21-HoPe-S7-1	2021	Germany
GCA_028443475.1	environment	soil	soil_sample	soil | Microbe sample from Acinetobacter baumannii | cell culture |	PRJNA862736	SAMN29993111	17-HoPe_S16-5	2017	Germany
GCA_028443465.1	environment	soil	soil_sample	soil | Microbe sample from Acinetobacter baumannii | cell culture |	PRJNA862736	SAMN29993110	17-HoPe_S1-2	2017	Germany
GCA_028443435.1	environment	soil	soil_sample	soil | Microbe sample from Acinetobacter baumannii | cell culture |	PRJNA862736	SAMN29993112	17-HoPe_S2-1	2017	Germany
GCA_028443425.1	environment	soil	soil_sample	soil | Microbe sample from Acinetobacter baumannii | cell culture |	PRJNA862736	SAMN29993114	17-HoPe_S7-1	2017	Germany
GCA_028443405.1	environment	soil	soil_sample	soil | Microbe sample from Acinetobacter baumannii | cell culture |	PRJNA862736	SAMN29993113	17-HoPe_S6-1	2017	Germany
GCA_028443375.1	environment	soil	soil_sample	soil | Microbe sample from Acinetobacter baumannii | cell culture |	PRJNA862736	SAMN29993116	17-HoPeS19-1	2017	Germany
GCA_028442895.1	environment	soil	soil_sample	soil | Microbe sample from Acinetobacter baumannii | cell culture |	PRJNA862736	SAMN29993139	17-ZW_S17.2-3	2017	Germany
GCA_028442875.1	environment	soil	soil_sample	soil | Microbe sample from Acinetobacter baumannii | cell culture |	PRJNA862736	SAMN29993140	17-ZW_S21.1-1	2017	Germany
GCA_028442865.1	environment	soil	soil_sample	soil | Microbe sample from Acinetobacter baumannii | cell culture |	PRJNA862736	SAMN29993142	17-ZW_S25.2-1	2017	Germany
GCA_028442845.1	environment	soil	soil_sample	soil | Microbe sample from Acinetobacter baumannii | cell culture |	PRJNA862736	SAMN29993141	17-ZW_S24.2-2	2017	Germany
GCA_028442825.1	environment	soil	soil_sample	soil | Microbe sample from Acinetobacter baumannii | cell culture |	PRJNA862736	SAMN29993143	17-ZW_S26.4-1	2017	Germany
GCA_028442805.1	environment	soil	soil_sample	soil | Microbe sample from Acinetobacter baumannii | cell culture |	PRJNA862736	SAMN29993144	17-ZW_S26.4-2	2017	Germany
GCA_028442785.1	environment	soil	soil_sample	soil | Microbe sample from Acinetobacter baumannii | cell culture |	PRJNA862736	SAMN29993145	17-ZW_S28.3-1	2017	Germany
GCA_028442755.1	environment	soil	soil_sample	soil | Microbe sample from Acinetobacter baumannii | cell culture |	PRJNA862736	SAMN29993148	17-ZW_S31.4-1	2017	Germany
GCA_028442745.1	environment	soil	soil_sample	soil | Microbe sample from Acinetobacter baumannii | cell culture |	PRJNA862736	SAMN29993146	17-ZW_S28.6-2	2017	Germany
GCA_028442725.1	environment	soil	soil_sample	soil | Microbe sample from Acinetobacter baumannii | cell culture |	PRJNA862736	SAMN29993147	17-ZW_S28.7-3	2017	Germany
GCA_028442705.1	environment	soil	soil_sample	soil | Microbe sample from Acinetobacter baumannii | cell culture |	PRJNA862736	SAMN29993149	17-ZW_S31.5-2	2017	Germany
GCA_028442685.1	environment	soil	soil_sample	soil | Microbe sample from Acinetobacter baumannii | cell culture |	PRJNA862736	SAMN29993150	17-ZW_S32.3-1	2017	Germany
GCA_028442655.1	environment	soil	soil_sample	soil | Microbe sample from Acinetobacter baumannii | cell culture |	PRJNA862736	SAMN29993151	17-ZW_S32.4-2	2017	Germany
GCA_028442645.1	environment	soil	soil_sample	soil | Microbe sample from Acinetobacter baumannii | cell culture |	PRJNA862736	SAMN29993152	17-ZW_S32.6-1	2017	Germany
GCA_028442625.1	environment	soil	soil_sample	soil | Microbe sample from Acinetobacter baumannii | cell culture |	PRJNA862736	SAMN29993153	17-ZW_S35.2-1	2017	Germany
GCA_028442605.1	environment	soil	soil_sample	soil | Microbe sample from Acinetobacter baumannii | cell culture |	PRJNA862736	SAMN29993154	17-ZW_S35.7-2	2017	Germany
GCA_028442445.1	environment	soil	soil_sample	soil | Microbe sample from Acinetobacter baumannii | cell culture |	PRJNA862736	SAMN29993161	17-ZW-S26-3-1	2017	Germany
GCA_028442415.1	environment	soil	soil_sample	soil | Microbe sample from Acinetobacter baumannii | cell culture |	PRJNA862736	SAMN29993163	17-ZWS30-1	2017	Germany
GCF_033345455.1	environment	soil	unpolluted_farm_soil	unpolluted field from farm land | Microbe sample from Acinetobacter baumannii | missing |	PRJNA224116	SAMN37972955	OYA S31	2023	Nigeria
GCF_000465635.2	environment	soil	vegetable_market_soil	vegetable market soil | Sample from Acinetobacter baumannii EGD-HP18 |	PRJNA224116	SAMN02469690	EGD-HP18	2012	India
GCA_036832955.1	environment	urban	urban_metagenome	urban | SRX822397 | CTOTU47666 | metagenomic assembly | urban | missing | missing | urban metagenome | missing |	PRJNA843551	SAMN28751164	GCA_036832955.1	2013	USA
GCA_032087635.1	environment	urban	urban_metagenome	urban | MIMAG Metagenome-assembled Genome sample from Acinetobacter baumannii | CTOTU50840 | metagenomic assembly | urban | Missing | Missing | urban metagenome |	PRJNA850115	SAMN29163989	GCA_032087635.1	2013	USA
GCA_032007085.1	environment	urban	urban_metagenome	urban | MIMAG Metagenome-assembled Genome sample from Acinetobacter baumannii | CTOTU47523 | metagenomic assembly | urban | Missing | Missing | urban metagenome |	PRJNA850115	SAMN29159938	GCA_032007085.1	2013	USA
GCA_032001925.1	environment	urban	urban_metagenome	urban | MIMAG Metagenome-assembled Genome sample from Acinetobacter baumannii | CTOTU48210 | metagenomic assembly | urban | Missing | Missing | urban metagenome |	PRJNA850115	SAMN29160885	GCA_032001925.1	2013	USA
GCA_031983725.1	environment	urban	urban_metagenome	urban | MIMAG Metagenome-assembled Genome sample from Acinetobacter baumannii | CTOTU47078 | metagenomic assembly | urban | Missing | Missing | urban metagenome |	PRJNA850115	SAMN29159125	GCA_031983725.1	2013	USA
GCA_031983165.1	environment	urban	urban_metagenome	urban | MIMAG Metagenome-assembled Genome sample from Acinetobacter baumannii | CTOTU47147 | metagenomic assembly | urban | Missing | Missing | urban metagenome |	PRJNA850115	SAMN29159154	GCA_031983165.1	2013	USA
GCA_031979965.1	environment	urban	urban_metagenome	urban | MIMAG Metagenome-assembled Genome sample from Acinetobacter baumannii | CTOTU46909 | metagenomic assembly | urban | Missing | Missing | urban metagenome |	PRJNA850115	SAMN29158969	GCA_031979965.1	2013	USA
GCA_031976745.1	environment	urban	urban_metagenome	urban | MIMAG Metagenome-assembled Genome sample from Acinetobacter baumannii | CTOTU46837 | metagenomic assembly | urban | Missing | Missing | urban metagenome |	PRJNA850115	SAMN29156452	GCA_031976745.1	2013	USA
GCA_031975655.1	environment	urban	urban_metagenome	urban | MIMAG Metagenome-assembled Genome sample from Acinetobacter baumannii | CTOTU46716 | metagenomic assembly | urban | Missing | Missing | urban metagenome |	PRJNA850115	SAMN29156336	GCA_031975655.1	2013	USA
GCF_032940475.1	environment	water	agricultural_surface_water	Agricultural surface water | Microbe sample from Acinetobacter baumannii | Not collected | Whole Organism |	PRJNA224116	SAMN26898583	MST-SNC-5	Missing	Canada
GCF_032940395.1	environment	water	agricultural_surface_water	Agricultural surface water | Microbe sample from Acinetobacter baumannii | Not collected | Whole Organism |	PRJNA224116	SAMN26898584	MST-SNC-9	Missing	Canada
GCF_032940335.1	environment	water	agricultural_surface_water	Agricultural surface water | Microbe sample from Acinetobacter baumannii | Not collected | Whole Organism |	PRJNA224116	SAMN26898587	MST-SNC-253	Missing	Canada
GCF_032940305.1	environment	water	agricultural_surface_water	Agricultural surface water | Microbe sample from Acinetobacter baumannii | Not collected | Whole Organism |	PRJNA224116	SAMN26898585	MST-SNC-8	Missing	Canada
GCF_032940275.1	environment	water	agricultural_surface_water	Agricultural surface water | Microbe sample from Acinetobacter baumannii | Not collected | Whole Organism |	PRJNA224116	SAMN26898586	MST-SNC-24	Missing	Canada
GCF_018831485.1	environment	water	artesian_well	Water (artesian well) | Pathogen |	PRJNA224116	SAMN14149265	Ex003	2012	Lebanon
GCF_029909475.1	environment	water	feedlot_water	Feedlot Water bowl | Microbe sample from Acinetobacter baumannii | missing | Cell culture | Feedlot |	PRJNA224116	SAMN34271990	WB4	2021	Canada
GCF_032822615.1	environment	water	lake	lake | Microbe sample from Acinetobacter baumannii | missing | cell culture |	PRJNA224116	SAMN33787963	SAAb472	2019	Australia
GCF_042863085.1	environment	water	lake	lake water | Microbe sample from Acinetobacter baumannii | lake water |	PRJNA224116	SAMN36763598	BI27	2017	Brazil
GCF_042862965.1	environment	water	lake	lake water | Microbe sample from Acinetobacter baumannii | lake water |	PRJNA224116	SAMN36763584	BI12	2017	Brazil
GCF_025515635.1	environment	water	river	Ozama River | Pathogen |	PRJNA224116	SAMN18612536	INTEC_OZFC5	2018	Dominican Republic
GCF_019903215.1	environment	water	river	Seine River | Pathogen |	PRJNA224116	SAMN15646561	B9	Missing	France
GCF_017897205.1	environment	water	river	Ozama River | Pathogen |	PRJNA224116	SAMN18607616	INTEC_OZFC7	2018	Dominican Republic
GCF_014858105.1	environment	water	river	Isabela River | Pathogen |	PRJNA224116	SAMN16287534	INTEC_BI15	2018	Dominican Republic
GCF_014858045.1	environment	water	river	Isabela River | Pathogen |	PRJNA224116	SAMN16287484	INTEC_AI12	2018	Dominican Republic
GCF_014712715.1	environment	water	river	Isabela River | Pathogen |	PRJNA224116	SAMN16191207	INTEC_BI9	2018	Dominican Republic
GCF_014705645.1	environment	water	river	Isabela River | Pathogen |	PRJNA224116	SAMN16191153	INTEC_BI5	2018	Dominican Republic
GCF_014323505.1	environment	water	river	missing | Pathogen |	PRJNA224116	SAMN15897437	INTEC_AI11	2018	Dominican Republic
GCA_028443725.1	environment	water	river	river Holtemme | Microbe sample from Acinetobacter baumannii | cell culture |	PRJNA862736	SAMN29993096	17-3_Was-1	2017	Germany
GCA_001516805.1	environment	water	river	River Bhagirathi | Microbe sample from Acinetobacter baumannii | whole organism |	PRJNA306911	SAMN04366600	IITR88	2015	India
GCF_029478065.1	environment	water	river	Water sample of Tiete River | Acinetobacter baumannii strain Ab120 |	PRJNA224116	SAMN32422429	Ab120	2010	Brazil
GCF_023094035.1	environment	water	sewage	Sewage | Pathogen |	PRJNA224116	SAMN25295621	Z1	2021	India
GCF_031158535.1	environment	water	sewage	sewage water | Pathogen |	PRJNA224116	SAMN37152340	C-SD-57	2023	China
GCF_031158295.1	environment	water	sewage	sewage water | Pathogen |	PRJNA224116	SAMN37152343	C-SD-84	2023	China
GCF_031158265.1	environment	water	sewage	sewage water | Pathogen |	PRJNA224116	SAMN37152357	C-YW-12	2023	China
GCF_031158195.1	environment	water	sewage	sewage water | Pathogen |	PRJNA224116	SAMN37152359	C-YW-49-2	2023	China
GCF_031158165.1	environment	water	sewage	sewage water | Pathogen |	PRJNA224116	SAMN37152358	C-YW-34	2023	China
GCF_031158115.1	environment	water	sewage	sewage water | Pathogen |	PRJNA224116	SAMN37152363	M-RB-64	2023	China
GCF_031158095.1	environment	water	sewage	sewage water | Pathogen |	PRJNA224116	SAMN37152379	C-SZ-55	2023	China
GCF_031158065.1	environment	water	sewage	sewage water | Pathogen |	PRJNA224116	SAMN37152383	C-SZ-92	2023	China
GCF_031158055.1	environment	water	sewage	sewage water | Pathogen |	PRJNA224116	SAMN37152384	M-ZR-32	2023	China
GCF_031158015.1	environment	water	sewage	sewage water | Pathogen |	PRJNA224116	SAMN37152373	C-SZ-10	2023	China
GCF_031157995.1	environment	water	sewage	sewage water | Pathogen |	PRJNA224116	SAMN37152374	C-SZ-13	2023	China
GCF_031157935.1	environment	water	sewage	sewage water | Pathogen |	PRJNA224116	SAMN37152385	M-ZR-44	2023	China
GCF_031157905.1	environment	water	sewage	sewage water | Pathogen |	PRJNA224116	SAMN37152380	C-SZ-65	2023	China
GCF_031157855.1	environment	water	sewage	sewage water | Pathogen |	PRJNA224116	SAMN37152378	C-SZ-50	2023	China
GCF_031157815.1	environment	water	sewage	sewage water | Pathogen |	PRJNA224116	SAMN37152372	C-RB-73	2023	China
GCF_031157795.1	environment	water	sewage	sewage water | Pathogen |	PRJNA224116	SAMN37152375	C-SZ-23	2023	China
GCF_031157755.1	environment	water	sewage	sewage water | Pathogen |	PRJNA224116	SAMN37152377	C-SZ-45	2023	China
GCF_031157735.1	environment	water	sewage	sewage water | Pathogen |	PRJNA224116	SAMN37152376	C-SZ-27	2023	China
GCF_031157715.1	environment	water	sewage	sewage water | Pathogen |	PRJNA224116	SAMN37152368	C-RB-40	2023	China
GCF_031157675.1	environment	water	sewage	sewage water | Pathogen |	PRJNA224116	SAMN37152386	M-ZR-56	2023	China
GCF_031157665.1	environment	water	sewage	sewage water | Pathogen |	PRJNA224116	SAMN37152381	C-SZ-70	2023	China
GCF_031157635.1	environment	water	sewage	sewage water | Pathogen |	PRJNA224116	SAMN37152387	C-ZR-2	2023	China
GCF_031157235.1	environment	water	sewage	sewage water | Pathogen |	PRJNA224116	SAMN37152390	C-ZR-20	2023	China
GCF_031157215.1	environment	water	sewage	sewage water | Pathogen |	PRJNA224116	SAMN37152392	C-ZR-48	2023	China
GCF_031157195.1	environment	water	sewage	sewage water | Pathogen |	PRJNA224116	SAMN37152391	C-ZR-22	2023	China
GCF_031157155.1	environment	water	sewage	sewage water | Pathogen |	PRJNA224116	SAMN37152393	C-ZR-51	2023	China
GCF_031157125.1	environment	water	sewage	sewage water | Pathogen |	PRJNA224116	SAMN37152397	M-ZR-3	2023	China
GCF_031157115.1	environment	water	sewage	sewage water | Pathogen |	PRJNA224116	SAMN37152398	M-ZR-4	2023	China
GCF_031156905.1	environment	water	sewage	sewage water | Pathogen |	PRJNA224116	SAMN37152389	C-ZR-17	2023	China
GCF_031156895.1	environment	water	sewage	sewage water | Pathogen |	PRJNA224116	SAMN37152405	C-ZR-15	2023	China
GCF_031156875.1	environment	water	sewage	sewage water | Pathogen |	PRJNA224116	SAMN37152396	M-ZR-1	2023	China
GCF_031156835.1	environment	water	sewage	sewage water | Pathogen |	PRJNA224116	SAMN37152388	C-ZR-3	2023	China
GCA_042928675.1	environment	water	surface_water_downstream	Enviromental | Microbe sample from Acinetobacter baumannii | Ab 19060 ENE2 | Surface waters Downstream |	PRJNA514245	SAMN40259824	GCA_042928675.1	2019	Romania
GCA_042927095.1	environment	water	surface_water_downstream	Enviromental | Microbe sample from Acinetobacter baumannii | 20070 CNE2 | Surface waters Downstream |	PRJNA514245	SAMN40259812	GCA_042927095.1	2020	Romania
GCF_038432215.1	environment	water	surface_water_pond	Surface water in a pond | Acinetobacter baumannii genome sequencing and assembly |	PRJNA224116	SAMN40996234	Hakim Ru_CBWP	2023	Bangladesh
GCF_029674845.1	environment	water	wastewater	wastewater | Microbe sample from Acinetobacter baumannii | mixed culture |	PRJNA224116	SAMN34062947	Ab_8_4	2020	China
GCF_029674825.1	environment	water	wastewater	wastewater | Microbe sample from Acinetobacter baumannii | missing | mixed culture |	PRJNA224116	SAMN34062951	LRB	2020	China
GCF_029674805.1	environment	water	wastewater	wastewater | Microbe sample from Acinetobacter baumannii | missing | mixed culture |	PRJNA224116	SAMN34062976	LRT	2020	China
GCF_031632215.1	environment	water	wastewater	Waste water | Pathogen |	PRJNA224116	SAMN37371051	CUTNBT01	2022	India
GCA_031142425.1	environment	water	wastewater	wastewater | GenomeTrakr_Bacterial isolate from wastewater | GenomeTrakr; LFFM YR3 | South Carolina Department of Health and Environmental Control | environmental |	PRJNA514245	SAMN35327579	GT23-0360	2023	USA
GCF_025457465.1	environment	water	wastewater	wastewater | Microbe sample from Acinetobacter baumannii | water |	PRJNA224116	SAMN28578902	164WW	2019	Romania
GCF_025457435.1	environment	water	wastewater	wastewater | Microbe sample from Acinetobacter baumannii | water |	PRJNA224116	SAMN28578900	007WW	2018	Romania
GCF_025457365.1	environment	water	wastewater	wastewater | Microbe sample from Acinetobacter baumannii | water |	PRJNA224116	SAMN28578903	165WW	2019	Romania
GCF_025457335.1	environment	water	wastewater	wastewater | Microbe sample from Acinetobacter baumannii | water |	PRJNA224116	SAMN28578904	168WW	2019	Romania
GCF_025457295.1	environment	water	wastewater	wastewater | Microbe sample from Acinetobacter baumannii | water |	PRJNA224116	SAMN28578907	171WW	2019	Romania
GCF_025457245.1	environment	water	wastewater	wastewater | Microbe sample from Acinetobacter baumannii | water |	PRJNA224116	SAMN28578910	174WW	2019	Romania
GCF_025457215.1	environment	water	wastewater	wastewater | Microbe sample from Acinetobacter baumannii | water |	PRJNA224116	SAMN28578908	172WW	2019	Romania
GCF_025457205.1	environment	water	wastewater	wastewater | Microbe sample from Acinetobacter baumannii | water |	PRJNA224116	SAMN28578913	183WW	2019	Romania
GCF_025457145.1	environment	water	wastewater	wastewater | Microbe sample from Acinetobacter baumannii | water |	PRJNA224116	SAMN28578914	184WW	2019	Romania
GCF_025457115.1	environment	water	wastewater	wastewater | Microbe sample from Acinetobacter baumannii | water |	PRJNA224116	SAMN28578915	185WW	2019	Romania
GCF_025457105.1	environment	water	wastewater	wastewater | Microbe sample from Acinetobacter baumannii | water |	PRJNA224116	SAMN28578912	182WW	2019	Romania
GCF_025457085.1	environment	water	wastewater	wastewater | Microbe sample from Acinetobacter baumannii | water |	PRJNA224116	SAMN28578916	186WW	2019	Romania
GCF_025457015.1	environment	water	wastewater	wastewater | Microbe sample from Acinetobacter baumannii | water |	PRJNA224116	SAMN28578920	190WW	2019	Romania
GCF_025457005.1	environment	water	wastewater	wastewater | Microbe sample from Acinetobacter baumannii | water |	PRJNA224116	SAMN28578921	191WW	2019	Romania
GCF_025456985.1	environment	water	wastewater	wastewater | Microbe sample from Acinetobacter baumannii | water |	PRJNA224116	SAMN28578922	192WW	2019	Romania
GCF_025456945.1	environment	water	wastewater	wastewater | Microbe sample from Acinetobacter baumannii | water |	PRJNA224116	SAMN28578926	202WW	2018	Romania
GCF_025456925.1	environment	water	wastewater	wastewater | Microbe sample from Acinetobacter baumannii | water |	PRJNA224116	SAMN28578925	201WW	2018	Romania
GCF_025456905.1	environment	water	wastewater	wastewater | Microbe sample from Acinetobacter baumannii | water |	PRJNA224116	SAMN28578924	195WW	2019	Romania
GCF_025456885.1	environment	water	wastewater	wastewater | Microbe sample from Acinetobacter baumannii | water |	PRJNA224116	SAMN28578927	203WW	2018	Romania
GCF_025456855.1	environment	water	wastewater	wastewater | Microbe sample from Acinetobacter baumannii | water |	PRJNA224116	SAMN28578930	18033CS-WW1	2018	Romania
GCF_025456825.1	environment	water	wastewater	wastewater | Microbe sample from Acinetobacter baumannii | water |	PRJNA224116	SAMN28578932	18033O3-WW	2018	Romania
GCF_025456815.1	environment	water	wastewater	wastewater | Microbe sample from Acinetobacter baumannii | water |	PRJNA224116	SAMN28578931	18032C2-WW	2018	Romania
GCF_025456805.1	environment	water	wastewater	wastewater | Microbe sample from Acinetobacter baumannii | water |	PRJNA224116	SAMN28578928	204WW	2018	Romania
GCA_042927865.1	environment	water	wastewater	Enviromental | Microbe sample from Acinetobacter baumannii | 20067 CNE5 | Waste waters Influent |	PRJNA514245	SAMN40259807	GCA_042927865.1	2020	Romania
GCA_041906095.1	environment	water	wastewater_sludge	activated sludge [ENVO:00002046] | MIMAG Metagenome-assembled Genome sample from Acinetobacter baumannii | SZ_szas3bin.27 | metagenomic assembly | sludge [ENVO:00002044] | activated sludge [ENVO:00002046] | activated sludge metagenome |	PRJNA1028341	SAMN38071811	GCA_041906095.1	2019	China
GCA_042925765.1	environment	water	wastewater_sludge	Enviromental | Microbe sample from Acinetobacter baumannii | 19014 ENE4 | Waste waters Active sludge |	PRJNA514245	SAMN40259756	GCA_042925765.1	2019	Romania
GCA_032940085.1	environment	water	wastewater_chlorinated	Chlorinated-WWTP | Microbe sample from Acinetobacter baumannii | Not collected | Whole Organism |	PRJNA819071	SAMN26898582	AcS27	Missing	Canada
GCF_032940695.1	environment	water	wastewater_chlorinated	Chlorinated-WWTP | Microbe sample from Acinetobacter baumannii | Not collected | Whole Organism |	PRJNA224116	SAMN26898577	AcS9	Missing	Canada
GCA_042925745.1	environment	water	wastewater_effluent	Enviromental | Microbe sample from Acinetobacter baumannii | 19015 CNE6 | Waste waters Effluent |	PRJNA514245	SAMN40259764	GCA_042925745.1	2019	Romania
GCF_018361325.1	environment	water	wastewater_hospital	hospital wastewater | Pathogen |	PRJNA224116	SAMN18520915	FG116	2017	South Africa
GCF_022427075.1	environment	water	wastewater_hospital	Hospital effluent | Pathogen |	PRJNA224116	SAMN18520936	PL448	2017	South Africa
GCF_032940585.1	environment	water	wastewater_chlorinated	Post-chlorinated-WWTP | Microbe sample from Acinetobacter baumannii | Not collected | Whole Organism |	PRJNA224116	SAMN26898578	AcS17	Missing	Canada
GCF_032940525.1	environment	water	wastewater_chlorinated	Post-chlorinated-WWTP | Microbe sample from Acinetobacter baumannii | Not collected | Whole Organism |	PRJNA224116	SAMN26898579	AcS18	Missing	Canada
GCF_032940515.1	environment	water	wastewater_chlorinated	Post-chlorinated-WWTP | Microbe sample from Acinetobacter baumannii | Not collected | Whole Organism |	PRJNA224116	SAMN26898580	AcS19	Missing	Canada
GCA_032940555.1	environment	water	wastewater_chlorinated	Post-chlorinated-WWTP | Microbe sample from Acinetobacter baumannii | Not collected | Whole Organism |	PRJNA819071	SAMN26898581	AcS20	Missing	Canada
GCF_002902885.1	environment	water	wastewater_sludge	Acinetobacter baumannii ABNIH28 | wastewater/sludge | not collected | not collected |	PRJNA224116	SAMN06040401	ABNIH28	2016	USA
GCF_025245665.1	environment	water	wastewater_sullage	waste water | Pathogen | waste water | sullage | odourous water |	PRJNA224116	SAMN30755299	IY-BUK-16	2021	Nigeria
GCF_025245645.1	environment	water	wastewater_sullage	waste water | Pathogen | waste water | sullage | odourous water |	PRJNA224116	SAMN30755300	IY-BUK-17	2021	Nigeria
GCF_014169655.1	environment	water	wastewater_treatment_plant	Acinetobacter baumannii str. WP8-W18-ESBL-11 | missing | wastewater treatment plant | wastewater | whole genome sequencing of Acinetobacter baumannii str. WP8-W18-ESBL-11 |	PRJNA224116	SAMD00194616	WP8-W18-ESBL-11	2018	Japan
GCF_014159355.1	environment	water	wastewater_treatment_plant	Acinetobacter baumannii str. WP4-W18-ESBL-11 | missing | wastewater treatment plant | wastewater | whole genome sequencing of Acinetobacter baumannii str. WP4-W18-ESBL-11 |	PRJNA224116	SAMD00194470	WP4-W18-ESBL-11	2018	Japan
GCF_005298085.1	environment	water	water_sample	water | Pathogen |	PRJNA224116	SAMN10237499	LWSS- 03-02-11B	2018	Germany
GCF_005298065.1	environment	water	water_sample	water | Pathogen |	PRJNA224116	SAMN10237498	LWSS- 03-02-11A	2018	Germany
GCF_046134935.1	environment	water	water_sample	water | Pathogen |	PRJNA224116	SAMN45862323	TDU5	2021	Bangladesh
GCF_040239585.1	environment	water	well	water | One Health Enteric sample from Acinetobacter baumannii | environmental assessment | environmental |	PRJNA224116	SAMN41801485	BI27	2019	Brazil
GCF_040223815.1	environment	water	well	water | One Health Enteric sample from Acinetobacter baumannii | environmental assessment | environmental |	PRJNA224116	SAMN41786671	BI12	2019	Brazil
GCF_040067455.1	industrial	facility	clean_room	clean room of pharmaceutical factory | Microbe sample from Acinetobacter baumannii | cell culture |	PRJNA224116	SAMN41502614	XH1673	2019	China
GCF_040068065.1	industrial	facility	clean_room	clean room of pharmaceutical factory | Microbe sample from Acinetobacter baumannii | cell culture |	PRJNA224116	SAMN41502633	XH1689	2019	China
GCF_040066995.1	industrial	facility	clean_room	clean room of pharmaceutical factory | Microbe sample from Acinetobacter baumannii | cell culture |	PRJNA224116	SAMN41502644	XH1700	2019	China
GCF_040067405.1	industrial	facility	clean_room	clean room of pharmaceutical factory | Microbe sample from Acinetobacter baumannii | cell culture |	PRJNA224116	SAMN41502645	XH1701	2019	China
GCF_040067475.1	industrial	facility	clean_room	clean room of pharmaceutical factory | Microbe sample from Acinetobacter baumannii | cell culture |	PRJNA224116	SAMN41502646	XH1702	2019	China
GCF_040067655.1	industrial	facility	clean_room	clean room of pharmaceutical factory | Microbe sample from Acinetobacter baumannii | cell culture |	PRJNA224116	SAMN41502693	XH1739	2020	China
GCF_026190395.1	industrial	facility	draining_conveyor	Draining-Matting Conveyor | Illumina whole genome sequence reads of Acinetobacter baumannii | cell culture |	PRJNA224116	SAMN25160008	T175	2019	USA
GCF_026190325.1	industrial	facility	draining_conveyor	Draining-Matting Conveyor | Illumina whole genome sequence reads of Acinetobacter baumannii | cell culture |	PRJNA224116	SAMN25160012	T182	2019	USA
GCF_026190315.1	industrial	facility	draining_conveyor	Draining-Matting Conveyor | Illumina whole genome sequence reads of Acinetobacter baumannii | cell culture |	PRJNA224116	SAMN25160011	T181	2019	USA
GCF_026190255.1	industrial	facility	draining_conveyor	Draining-Matting Conveyor | Illumina whole genome sequence reads of Acinetobacter baumannii | cell culture |	PRJNA224116	SAMN25160017	T187	2019	USA
GCF_026190135.1	industrial	facility	draining_conveyor	Draining-Matting Conveyor | Illumina whole genome sequence reads of Acinetobacter baumannii | cell culture |	PRJNA224116	SAMN25160016	T186	2019	USA
GCF_026190115.1	industrial	facility	draining_conveyor	Draining-Matting Conveyor | Illumina whole genome sequence reads of Acinetobacter baumannii | cell culture |	PRJNA224116	SAMN25160010	T177	2019	USA
GCF_026190095.1	industrial	facility	draining_conveyor	Draining-Matting Conveyor | Illumina whole genome sequence reads of Acinetobacter baumannii | cell culture |	PRJNA224116	SAMN25160002	T160	2019	USA
GCF_026189975.1	industrial	facility	draining_conveyor	Draining-Matting Conveyor | Illumina whole genome sequence reads of Acinetobacter baumannii | cell culture |	PRJNA224116	SAMN25160018	T188	2019	USA
GCF_026189965.1	industrial	facility	draining_conveyor	Draining-Matting Conveyor | Illumina whole genome sequence reads of Acinetobacter baumannii | cell culture |	PRJNA224116	SAMN25160019	T189	2019	USA
GCF_026189815.1	industrial	facility	draining_conveyor	Draining-Matting Conveyor | Illumina whole genome sequence reads of Acinetobacter baumannii | cell culture |	PRJNA224116	SAMN25160013	T183	2019	USA
GCF_026189665.1	industrial	facility	draining_conveyor	Draining-Matting Conveyor | Illumina whole genome sequence reads of Acinetobacter baumannii | cell culture |	PRJNA224116	SAMN25160003	T161	2019	USA
GCF_026189655.1	industrial	facility	draining_conveyor	Draining-Matting Conveyor | Illumina whole genome sequence reads of Acinetobacter baumannii | cell culture |	PRJNA224116	SAMN25160014	T184	2019	USA
GCF_026189635.1	industrial	facility	draining_conveyor	Draining-Matting Conveyor | Illumina whole genome sequence reads of Acinetobacter baumannii | cell culture |	PRJNA224116	SAMN25160004	T162	2019	USA
GCF_026189595.1	industrial	facility	draining_conveyor	Draining-Matting Conveyor | Illumina whole genome sequence reads of Acinetobacter baumannii | cell culture |	PRJNA224116	SAMN25160015	T185	2019	USA
GCF_026195215.1	industrial	facility	draining_conveyor	Draining-Matting Conveyor | Illumina whole genome sequence reads of Acinetobacter baumannii | cell culture |	PRJNA224116	SAMN25159978	C17	2019	USA
GCF_026195175.1	industrial	facility	draining_conveyor	Draining-Matting Conveyor | Illumina whole genome sequence reads of Acinetobacter baumannii | cell culture |	PRJNA224116	SAMN25160022	C117	2020	USA
GCF_026195165.1	industrial	facility	draining_conveyor	Draining-Matting Conveyor | Illumina whole genome sequence reads of Acinetobacter baumannii | cell culture |	PRJNA224116	SAMN25159975	C10	2019	USA
GCF_026195155.1	industrial	facility	draining_conveyor	Draining-Matting Conveyor | Illumina whole genome sequence reads of Acinetobacter baumannii | cell culture |	PRJNA224116	SAMN25160021	C114	2020	USA
GCF_026195135.1	industrial	facility	draining_conveyor	Draining-Matting Conveyor | Illumina whole genome sequence reads of Acinetobacter baumannii | cell culture |	PRJNA224116	SAMN25160023	C118	2020	USA
GCF_026195085.1	industrial	facility	draining_conveyor	Draining-Matting Conveyor | Illumina whole genome sequence reads of Acinetobacter baumannii | cell culture |	PRJNA224116	SAMN25160024	C119	2020	USA
GCF_026195045.1	industrial	facility	draining_conveyor	Draining-Matting Conveyor | Illumina whole genome sequence reads of Acinetobacter baumannii | cell culture |	PRJNA224116	SAMN25159979	C38	2019	USA
GCF_026195035.1	industrial	facility	draining_conveyor	Draining-Matting Conveyor | Illumina whole genome sequence reads of Acinetobacter baumannii | cell culture |	PRJNA224116	SAMN25159989	C102	2019	USA
GCF_026194995.1	industrial	facility	draining_conveyor	Draining-Matting Conveyor | Illumina whole genome sequence reads of Acinetobacter baumannii | cell culture |	PRJNA224116	SAMN25160025	C120	2020	USA
GCF_026194895.1	industrial	facility	draining_conveyor	Draining-Matting Conveyor | Illumina whole genome sequence reads of Acinetobacter baumannii | cell culture |	PRJNA224116	SAMN25159982	C42	2019	USA
GCF_026194825.1	industrial	facility	draining_conveyor	Draining-Matting Conveyor | Illumina whole genome sequence reads of Acinetobacter baumannii | cell culture |	PRJNA224116	SAMN25160027	C123	2020	USA
GCF_026194815.1	industrial	facility	draining_conveyor	Draining-Matting Conveyor | Illumina whole genome sequence reads of Acinetobacter baumannii | cell culture |	PRJNA224116	SAMN25160026	C122	2020	USA
GCF_026194805.1	industrial	facility	draining_conveyor	Draining-Matting Conveyor | Illumina whole genome sequence reads of Acinetobacter baumannii | cell culture |	PRJNA224116	SAMN25159981	C41	2019	USA
GCF_026194795.1	industrial	facility	draining_conveyor	Draining-Matting Conveyor | Illumina whole genome sequence reads of Acinetobacter baumannii | cell culture |	PRJNA224116	SAMN25159980	C39	2019	USA
GCF_026194685.1	industrial	facility	draining_conveyor	Draining-Matting Conveyor | Illumina whole genome sequence reads of Acinetobacter baumannii | cell culture |	PRJNA224116	SAMN25159976	C13	2019	USA
GCF_026194675.1	industrial	facility	draining_conveyor	Draining-Matting Conveyor | Illumina whole genome sequence reads of Acinetobacter baumannii | cell culture |	PRJNA224116	SAMN25159988	C85	2019	USA
GCF_026194565.1	industrial	facility	draining_conveyor	Draining-Matting Conveyor | Illumina whole genome sequence reads of Acinetobacter baumannii | cell culture |	PRJNA224116	SAMN25159977	C16	2019	USA
GCF_026194555.1	industrial	facility	draining_conveyor	Draining-Matting Conveyor | Illumina whole genome sequence reads of Acinetobacter baumannii | cell culture |	PRJNA224116	SAMN25159983	C92	2019	USA
GCF_026194465.1	industrial	facility	draining_conveyor	Draining-Matting Conveyor | Illumina whole genome sequence reads of Acinetobacter baumannii | cell culture |	PRJNA224116	SAMN25159973	T126	2019	USA
GCF_026194385.1	industrial	facility	draining_conveyor	Draining-Matting Conveyor | Illumina whole genome sequence reads of Acinetobacter baumannii | cell culture |	PRJNA224116	SAMN25159972	T119	2019	USA
GCF_026194245.1	industrial	facility	draining_conveyor	Draining-Matting Conveyor | Illumina whole genome sequence reads of Acinetobacter baumannii | cell culture |	PRJNA224116	SAMN25159993	T144	2019	USA
GCF_026194145.1	industrial	facility	draining_conveyor	Draining-Matting Conveyor | Illumina whole genome sequence reads of Acinetobacter baumannii | cell culture |	PRJNA224116	SAMN25159985	C64	2019	USA
GCF_026194115.1	industrial	facility	draining_conveyor	Draining-Matting Conveyor | Illumina whole genome sequence reads of Acinetobacter baumannii | cell culture |	PRJNA224116	SAMN25159984	C63	2019	USA
GCF_026194095.1	industrial	facility	draining_conveyor	Draining-Matting Conveyor | Illumina whole genome sequence reads of Acinetobacter baumannii | cell culture |	PRJNA224116	SAMN25159990	C107	2019	USA
GCF_026194075.1	industrial	facility	draining_conveyor	Draining-Matting Conveyor | Illumina whole genome sequence reads of Acinetobacter baumannii | cell culture |	PRJNA224116	SAMN25159987	C68	2019	USA
GCF_026193955.1	industrial	facility	draining_conveyor	Draining-Matting Conveyor | Illumina whole genome sequence reads of Acinetobacter baumannii | cell culture |	PRJNA224116	SAMN25159986	C67	2019	USA
GCF_026190685.1	industrial	facility	draining_conveyor	Draining-Matting Conveyor | Illumina whole genome sequence reads of Acinetobacter baumannii | cell culture |	PRJNA224116	SAMN25160006	T134	2019	USA
GCF_026190675.1	industrial	facility	draining_conveyor	Draining-Matting Conveyor | Illumina whole genome sequence reads of Acinetobacter baumannii | cell culture |	PRJNA224116	SAMN25159991	T138	2019	USA
GCF_026190635.1	industrial	facility	draining_conveyor	Draining-Matting Conveyor | Illumina whole genome sequence reads of Acinetobacter baumannii | cell culture |	PRJNA224116	SAMN25159996	T153	2019	USA
GCF_026190615.1	industrial	facility	draining_conveyor	Draining-Matting Conveyor | Illumina whole genome sequence reads of Acinetobacter baumannii | cell culture |	PRJNA224116	SAMN25159992	T143	2019	USA
GCF_026190595.1	industrial	facility	draining_conveyor	Draining-Matting Conveyor | Illumina whole genome sequence reads of Acinetobacter baumannii | cell culture |	PRJNA224116	SAMN25159997	T154	2019	USA
GCF_026190575.1	industrial	facility	draining_conveyor	Draining-Matting Conveyor | Illumina whole genome sequence reads of Acinetobacter baumannii | cell culture |	PRJNA224116	SAMN25159995	T152	2019	USA
GCF_026190555.1	industrial	facility	draining_conveyor	Draining-Matting Conveyor | Illumina whole genome sequence reads of Acinetobacter baumannii | cell culture |	PRJNA224116	SAMN25159998	T155	2019	USA
GCF_026190535.1	industrial	facility	draining_conveyor	Draining-Matting Conveyor | Illumina whole genome sequence reads of Acinetobacter baumannii | cell culture |	PRJNA224116	SAMN25159999	T156	2019	USA
GCF_026190515.1	industrial	facility	draining_conveyor	Draining-Matting Conveyor | Illumina whole genome sequence reads of Acinetobacter baumannii | cell culture |	PRJNA224116	SAMN25159994	T151	2019	USA
GCF_026190495.1	industrial	facility	draining_conveyor	Draining-Matting Conveyor | Illumina whole genome sequence reads of Acinetobacter baumannii | cell culture |	PRJNA224116	SAMN25160005	T172	2019	USA
GCF_026190445.1	industrial	facility	draining_conveyor	Draining-Matting Conveyor | Illumina whole genome sequence reads of Acinetobacter baumannii | cell culture |	PRJNA224116	SAMN25160001	T159	2019	USA
GCF_026190435.1	industrial	facility	draining_conveyor	Draining-Matting Conveyor | Illumina whole genome sequence reads of Acinetobacter baumannii | cell culture |	PRJNA224116	SAMN25160009	T176	2019	USA
GCF_026190425.1	industrial	facility	draining_conveyor	Draining-Matting Conveyor | Illumina whole genome sequence reads of Acinetobacter baumannii | cell culture |	PRJNA224116	SAMN25160007	T173	2019	USA
GCF_026190415.1	industrial	facility	draining_conveyor	Draining-Matting Conveyor | Illumina whole genome sequence reads of Acinetobacter baumannii | cell culture |	PRJNA224116	SAMN25160000	T157	2019	USA
GCF_026189845.2	industrial	facility	draining_conveyor	Draining-Matting Conveyor | Illumina whole genome sequence reads of Acinetobacter baumannii | cell culture |	PRJNA224116	SAMN25160020	T190	2019	USA
GCF_026194635.2	industrial	facility	draining_conveyor	Draining-Matting Conveyor | Illumina whole genome sequence reads of Acinetobacter baumannii | cell culture |	PRJNA224116	SAMN25159974	C9	2019	USA
GCA_044540135.1	industrial	facility	manipulation_table	The surface of the manipulation table | Pathogen |	PRJNA1165946	SAMN43949525	vekt164SM413480	2022	Russia
GCF_027257795.1	industrial	farm_facility	boot_swab	boot swab | Microbe sample from Acinetobacter baumannii | culture |	PRJNA224116	SAMN31846762	98_E23.3	2019	Germany
GCF_027257275.1	industrial	farm_facility	boot_swab	boot swab | Microbe sample from Acinetobacter baumannii | culture |	PRJNA224116	SAMN31846786	57_XXE4	2019	Germany
GCF_027257765.1	industrial	farm_facility	chick_box_paper	chick-box-paper | Microbe sample from Acinetobacter baumannii | culture |	PRJNA224116	SAMN31846763	71_W90.3	2019	Germany
GCF_027257755.1	industrial	farm_facility	chick_box_paper	chick-box-paper | Microbe sample from Acinetobacter baumannii | culture |	PRJNA224116	SAMN31846764	68_W85.3	2019	Germany
GCF_027257735.1	industrial	farm_facility	chick_box_paper	chick-box-paper | Microbe sample from Acinetobacter baumannii | culture |	PRJNA224116	SAMN31846765	82_W103.2	2019	Germany
GCF_027257695.1	industrial	farm_facility	chick_box_paper	chick-box-paper | Microbe sample from Acinetobacter baumannii | culture |	PRJNA224116	SAMN31846766	94_W117.3	2019	Germany
GCF_027257675.1	industrial	farm_facility	chick_box_paper	chick-box-paper | Microbe sample from Acinetobacter baumannii | culture |	PRJNA224116	SAMN31846768	96_W118.4	2019	Germany
GCF_027257665.1	industrial	farm_facility	chick_box_paper	chick-box-paper | Microbe sample from Acinetobacter baumannii | culture |	PRJNA224116	SAMN31846769	54_W70.1	2019	Germany
GCF_027257655.1	industrial	farm_facility	chick_box_paper	chick-box-paper | Microbe sample from Acinetobacter baumannii | culture |	PRJNA224116	SAMN31846767	12_W15.2	2019	Germany
GCF_027257635.1	industrial	farm_facility	chick_box_paper	chick-box-paper | Microbe sample from Acinetobacter baumannii | culture |	PRJNA224116	SAMN31846771	44_W59.1	2019	Germany
GCF_027257615.1	industrial	farm_facility	chick_box_paper	chick-box-paper | Microbe sample from Acinetobacter baumannii | culture |	PRJNA224116	SAMN31846772	8_W11.1	2019	Germany
GCF_027257595.1	industrial	farm_facility	chick_box_paper	chick-box-paper | Microbe sample from Acinetobacter baumannii | culture |	PRJNA224116	SAMN31846770	29_W43.1	2019	Germany
GCF_027257575.1	industrial	farm_facility	chick_box_paper	chick-box-paper | Microbe sample from Acinetobacter baumannii | culture |	PRJNA224116	SAMN31846773	16_W23.1	2019	Germany
GCF_027257555.1	industrial	farm_facility	chick_box_paper	chick-box-paper | Microbe sample from Acinetobacter baumannii | culture |	PRJNA224116	SAMN31846774	17_W24.2	2019	Germany
GCF_027257525.1	industrial	farm_facility	chick_box_paper	chick-box-paper | Microbe sample from Acinetobacter baumannii | culture |	PRJNA224116	SAMN31846776	37_W52.1	2019	Germany
GCF_027257515.1	industrial	farm_facility	chick_box_paper	chick-box-paper | Microbe sample from Acinetobacter baumannii | culture |	PRJNA224116	SAMN31846775	59_W75.1	2019	Germany
GCF_027257495.1	industrial	farm_facility	chick_box_paper	chick-box-paper | Microbe sample from Acinetobacter baumannii | culture |	PRJNA224116	SAMN31846777	66_W83.1	2019	Germany
GCF_027257475.1	industrial	farm_facility	chick_box_paper	chick-box-paper | Microbe sample from Acinetobacter baumannii | culture |	PRJNA224116	SAMN31846778	36_W51.1	2019	Czech Republic
GCF_027257445.1	industrial	farm_facility	chick_box_paper	chick-box-paper | Microbe sample from Acinetobacter baumannii | culture |	PRJNA224116	SAMN31846779	35_W50.1	2019	Germany
GCF_027257435.1	industrial	farm_facility	chick_box_paper	chick-box-paper | Microbe sample from Acinetobacter baumannii | culture |	PRJNA224116	SAMN31846780	48_W63.2	2019	Germany
GCF_027257415.1	industrial	farm_facility	chick_box_paper	chick-box-paper | Microbe sample from Acinetobacter baumannii | culture |	PRJNA224116	SAMN31846783	31_W46.3	2019	Germany
GCF_027257385.1	industrial	farm_facility	chick_box_paper	chick-box-paper | Microbe sample from Acinetobacter baumannii | culture |	PRJNA224116	SAMN31846782	32_W47.2	2019	Germany
GCF_027257375.1	industrial	farm_facility	chick_box_paper	chick-box-paper | Microbe sample from Acinetobacter baumannii | culture |	PRJNA224116	SAMN31846781	95_W118.3	2019	Germany
GCF_027257355.1	industrial	farm_facility	chick_box_paper	chick-box-paper | Microbe sample from Acinetobacter baumannii | culture |	PRJNA224116	SAMN31846784	3_W5.2	2019	Germany
GCF_027257305.1	industrial	farm_facility	chick_box_paper	chick-box-paper | Microbe sample from Acinetobacter baumannii | culture |	PRJNA224116	SAMN31846785	22_W33.1	2019	Germany
GCA_028447355.1	industrial	farm_facility	hatchery_air	duck hatchery air sample | Microbe sample from Acinetobacter baumannii | cell culture |	PRJNA862736	SAMN29992954	08-IB3	2008	Germany
GCF_045791805.1	industrial	processing	food_sample	food | Microbe sample from Acinetobacter baumannii | not applicable | bacterial sample |	PRJNA224116	SAMN39931189	54691	2018	France
GCF_045791715.1	industrial	processing	food_sample	food | Microbe sample from Acinetobacter baumannii | not applicable | bacterial sample |	PRJNA224116	SAMN39931192	53380	2019	Switzerland
GCF_045791705.1	industrial	processing	food_sample	food | Microbe sample from Acinetobacter baumannii | not applicable | bacterial sample |	PRJNA224116	SAMN39931193	53379	2019	Switzerland
GCF_045791735.1	industrial	processing	food_sample	food | Microbe sample from Acinetobacter baumannii | not applicable | bacterial sample |	PRJNA224116	SAMN39931194	53387	2019	Switzerland
GCF_045791665.1	industrial	processing	food_sample	food | Microbe sample from Acinetobacter baumannii | not applicable | bacterial sample |	PRJNA224116	SAMN39931195	53394	2019	Switzerland
GCF_045791605.1	industrial	processing	food_sample	food | Microbe sample from Acinetobacter baumannii | not applicable | bacterial sample |	PRJNA224116	SAMN39931196	53398	2019	Switzerland
GCF_045791585.1	industrial	processing	food_sample	food | Microbe sample from Acinetobacter baumannii | not applicable | bacterial sample |	PRJNA224116	SAMN39931197	53388	2019	Switzerland
GCF_045791615.1	industrial	processing	food_sample	food | Microbe sample from Acinetobacter baumannii | not applicable | bacterial sample |	PRJNA224116	SAMN39931198	53386	2019	Switzerland
GCF_045791555.1	industrial	processing	food_sample	food | Microbe sample from Acinetobacter baumannii | not applicable | bacterial sample |	PRJNA224116	SAMN39931200	53401	2019	Switzerland
GCF_045791525.1	industrial	processing	food_sample	food | Microbe sample from Acinetobacter baumannii | not applicable | bacterial sample |	PRJNA224116	SAMN39931201	54696	2019	France
GCF_045791505.1	industrial	processing	food_sample	food | Microbe sample from Acinetobacter baumannii | not applicable | bacterial sample |	PRJNA224116	SAMN39931202	54681	2018	France
GCF_045791495.1	industrial	processing	food_sample	food | Microbe sample from Acinetobacter baumannii | not applicable | bacterial sample |	PRJNA224116	SAMN39931203	54702	2019	France
GCF_045791475.1	industrial	processing	food_sample	food | Microbe sample from Acinetobacter baumannii | not applicable | bacterial sample |	PRJNA224116	SAMN39931204	54690	2018	France
GCF_045791455.1	industrial	processing	food_sample	food | Microbe sample from Acinetobacter baumannii | not applicable | bacterial sample |	PRJNA224116	SAMN39931205	54697	2019	France
GCF_045791405.1	industrial	processing	food_sample	food | Microbe sample from Acinetobacter baumannii | not applicable | bacterial sample |	PRJNA224116	SAMN39931206	53395	2019	Switzerland
GCF_045791425.1	industrial	processing	food_sample	food | Microbe sample from Acinetobacter baumannii | not applicable | bacterial sample |	PRJNA224116	SAMN39931207	53407	2019	Switzerland
GCF_045791385.1	industrial	processing	food_sample	food | Microbe sample from Acinetobacter baumannii | not applicable | bacterial sample |	PRJNA224116	SAMN39931208	54660	2019	France
GCF_045791375.1	industrial	processing	food_sample	food | Microbe sample from Acinetobacter baumannii | not applicable | bacterial sample |	PRJNA224116	SAMN39931209	54721	2019	France
GCF_045791355.1	industrial	processing	food_sample	food | Microbe sample from Acinetobacter baumannii | not applicable | bacterial sample |	PRJNA224116	SAMN39931210	53385	2019	Switzerland
GCF_045791325.1	industrial	processing	food_sample	food | Microbe sample from Acinetobacter baumannii | not applicable | bacterial sample |	PRJNA224116	SAMN39931211	54725	2019	France
GCF_045791265.1	industrial	processing	food_sample	food | Microbe sample from Acinetobacter baumannii | not applicable | bacterial sample |	PRJNA224116	SAMN39931212	54699	2019	France
GCF_045791315.1	industrial	processing	food_sample	food | Microbe sample from Acinetobacter baumannii | not applicable | bacterial sample |	PRJNA224116	SAMN39931213	53375	2019	Switzerland
GCF_045791275.1	industrial	processing	food_sample	food | Microbe sample from Acinetobacter baumannii | not applicable | bacterial sample |	PRJNA224116	SAMN39931214	53378	2019	Switzerland
GCF_045791255.1	industrial	processing	food_sample	food | Microbe sample from Acinetobacter baumannii | not applicable | bacterial sample |	PRJNA224116	SAMN39931215	54687	2018	France
GCF_045791235.1	industrial	processing	food_sample	food | Microbe sample from Acinetobacter baumannii | not applicable | bacterial sample |	PRJNA224116	SAMN39931216	53374	2019	Switzerland
GCF_045791185.1	industrial	processing	food_sample	food | Microbe sample from Acinetobacter baumannii | not applicable | bacterial sample |	PRJNA224116	SAMN39931217	53403	2019	Switzerland
GCF_045791215.1	industrial	processing	food_sample	food | Microbe sample from Acinetobacter baumannii | not applicable | bacterial sample |	PRJNA224116	SAMN39931218	53402	2019	Switzerland
GCF_045791155.1	industrial	processing	food_sample	food | Microbe sample from Acinetobacter baumannii | not applicable | bacterial sample |	PRJNA224116	SAMN39931219	54706	2019	France
GCF_045791165.1	industrial	processing	food_sample	food | Microbe sample from Acinetobacter baumannii | not applicable | bacterial sample |	PRJNA224116	SAMN39931220	53399	2019	Switzerland
GCF_045791135.1	industrial	processing	food_sample	food | Microbe sample from Acinetobacter baumannii | not applicable | bacterial sample |	PRJNA224116	SAMN39931221	54694	2019	France
GCF_045791095.1	industrial	processing	food_sample	food | Microbe sample from Acinetobacter baumannii | not applicable | bacterial sample |	PRJNA224116	SAMN39931222	54677	2018	France
GCF_045791115.1	industrial	processing	food_sample	food | Microbe sample from Acinetobacter baumannii | not applicable | bacterial sample |	PRJNA224116	SAMN39931223	54708	2019	France
GCF_045791035.1	industrial	processing	food_sample	food | Microbe sample from Acinetobacter baumannii | not applicable | bacterial sample |	PRJNA224116	SAMN39931224	53393	2019	Switzerland
GCF_045791065.1	industrial	processing	food_sample	food | Microbe sample from Acinetobacter baumannii | not applicable | bacterial sample |	PRJNA224116	SAMN39931225	54711	2019	France
GCF_045791055.1	industrial	processing	food_sample	food | Microbe sample from Acinetobacter baumannii | not applicable | bacterial sample |	PRJNA224116	SAMN39931226	54705	2019	France
GCF_045790945.1	industrial	processing	food_sample	food | Microbe sample from Acinetobacter baumannii | not applicable | bacterial sample |	PRJNA224116	SAMN39931227	54707	2019	France
GCF_045790955.1	industrial	processing	food_sample	food | Microbe sample from Acinetobacter baumannii | not applicable | bacterial sample |	PRJNA224116	SAMN39931228	54698	2019	France
GCF_045790975.1	industrial	processing	food_sample	food | Microbe sample from Acinetobacter baumannii | not applicable | bacterial sample |	PRJNA224116	SAMN39931229	53384	2019	Switzerland
GCF_045790985.1	industrial	processing	food_sample	food | Microbe sample from Acinetobacter baumannii | not applicable | bacterial sample |	PRJNA224116	SAMN39931230	53397	2019	Switzerland
GCF_045790935.1	industrial	processing	food_sample	food | Microbe sample from Acinetobacter baumannii | not applicable | bacterial sample |	PRJNA224116	SAMN39931231	53405	2019	Switzerland
GCF_045790885.1	industrial	processing	food_sample	food | Microbe sample from Acinetobacter baumannii | not applicable | bacterial sample |	PRJNA224116	SAMN39931232	53404	2019	Switzerland
GCF_045790865.1	industrial	processing	food_sample	food | Microbe sample from Acinetobacter baumannii | not applicable | bacterial sample |	PRJNA224116	SAMN39931233	53410	2019	Switzerland
GCF_045790855.1	industrial	processing	food_sample	food | Microbe sample from Acinetobacter baumannii | not applicable | bacterial sample |	PRJNA224116	SAMN39931234	54688	2018	France
GCF_045790835.1	industrial	processing	food_sample	food | Microbe sample from Acinetobacter baumannii | not applicable | bacterial sample |	PRJNA224116	SAMN39931235	54713	2019	France
GCF_045790875.1	industrial	processing	food_sample	food | Microbe sample from Acinetobacter baumannii | not applicable | bacterial sample |	PRJNA224116	SAMN39931236	54710	2019	France
GCF_045790815.1	industrial	processing	food_sample	food | Microbe sample from Acinetobacter baumannii | not applicable | bacterial sample |	PRJNA224116	SAMN39931237	54717	2019	France
GCF_045790755.1	industrial	processing	food_sample	food | Microbe sample from Acinetobacter baumannii | not applicable | bacterial sample |	PRJNA224116	SAMN39931238	54712A	2019	France
GCF_045790765.1	industrial	processing	food_sample	food | Microbe sample from Acinetobacter baumannii | not applicable | bacterial sample |	PRJNA224116	SAMN39931239	54718	2019	France
GCF_045790735.1	industrial	processing	food_sample	food | Microbe sample from Acinetobacter baumannii | not applicable | bacterial sample |	PRJNA224116	SAMN39931240	54665	2019	France
GCF_045790745.1	industrial	processing	food_sample	food | Microbe sample from Acinetobacter baumannii | not applicable | bacterial sample |	PRJNA224116	SAMN39931241	54720	2019	France
GCF_045790715.1	industrial	processing	food_sample	food | Microbe sample from Acinetobacter baumannii | not applicable | bacterial sample |	PRJNA224116	SAMN39931242	53409	2019	Switzerland
GCF_045790675.1	industrial	processing	food_sample	food | Microbe sample from Acinetobacter baumannii | not applicable | bacterial sample |	PRJNA224116	SAMN39931243	53396	2019	Switzerland
GCF_045790655.1	industrial	processing	food_sample	food | Microbe sample from Acinetobacter baumannii | not applicable | bacterial sample |	PRJNA224116	SAMN39931244	54722	2019	France
GCF_045790635.1	industrial	processing	food_sample	food | Microbe sample from Acinetobacter baumannii | not applicable | bacterial sample |	PRJNA224116	SAMN39931245	54679	2018	France
GCF_045790645.1	industrial	processing	food_sample	food | Microbe sample from Acinetobacter baumannii | not applicable | bacterial sample |	PRJNA224116	SAMN39931246	54693	2019	France
GCF_045790615.1	industrial	processing	food_sample	food | Microbe sample from Acinetobacter baumannii | not applicable | bacterial sample |	PRJNA224116	SAMN39931247	54680	2018	France
GCF_045790585.1	industrial	processing	food_sample	food | Microbe sample from Acinetobacter baumannii | not applicable | bacterial sample |	PRJNA224116	SAMN39931248	53382	2019	Switzerland
GCF_045790575.1	industrial	processing	food_sample	food | Microbe sample from Acinetobacter baumannii | not applicable | bacterial sample |	PRJNA224116	SAMN39931249	53389	2019	Switzerland
GCF_045790545.1	industrial	processing	food_sample	food | Microbe sample from Acinetobacter baumannii | not applicable | bacterial sample |	PRJNA224116	SAMN39931250	53391	2019	Switzerland
GCF_045790535.1	industrial	processing	food_sample	food | Microbe sample from Acinetobacter baumannii | not applicable | bacterial sample |	PRJNA224116	SAMN39931251	53390	2019	Switzerland
GCF_045790515.1	industrial	processing	food_sample	food | Microbe sample from Acinetobacter baumannii | not applicable | bacterial sample |	PRJNA224116	SAMN39931252	53412	2019	Switzerland
GCF_045790475.1	industrial	processing	food_sample	food | Microbe sample from Acinetobacter baumannii | not applicable | bacterial sample |	PRJNA224116	SAMN39931253	54703	2019	France
GCF_045790455.1	industrial	processing	food_sample	food | Microbe sample from Acinetobacter baumannii | not applicable | bacterial sample |	PRJNA224116	SAMN39931254	54716	2019	France
GCF_045790485.1	industrial	processing	food_sample	food | Microbe sample from Acinetobacter baumannii | not applicable | bacterial sample |	PRJNA224116	SAMN39931255	53392	2019	Switzerland
GCF_045790355.1	industrial	processing	food_sample	food | Microbe sample from Acinetobacter baumannii | not applicable | bacterial sample |	PRJNA224116	SAMN39931256	54684	2018	France
GCF_045790405.1	industrial	processing	food_sample	food | Microbe sample from Acinetobacter baumannii | not applicable | bacterial sample |	PRJNA224116	SAMN39931257	54676	2018	France
GCF_045790415.1	industrial	processing	food_sample	food | Microbe sample from Acinetobacter baumannii | not applicable | bacterial sample |	PRJNA224116	SAMN39931258	54695	2019	France
GCF_045790375.1	industrial	processing	food_sample	food | Microbe sample from Acinetobacter baumannii | not applicable | bacterial sample |	PRJNA224116	SAMN39931259	53411	2019	Switzerland
GCF_045790385.1	industrial	processing	food_sample	food | Microbe sample from Acinetobacter baumannii | not applicable | bacterial sample |	PRJNA224116	SAMN39931260	54683	2018	France
GCA_045791775.1	industrial	processing	food_sample	food | Microbe sample from Acinetobacter baumannii | not applicable | bacterial sample |	PRJNA1076118	SAMN39931190	54728	2019	France
GCA_045791765.1	industrial	processing	food_sample	food | Microbe sample from Acinetobacter baumannii | not applicable | bacterial sample |	PRJNA1076118	SAMN39931191	54700	2019	France
GCA_045791575.1	industrial	processing	food_sample	food | Microbe sample from Acinetobacter baumannii | not applicable | bacterial sample |	PRJNA1076118	SAMN39931199	53377	2019	Switzerland
GCF_019264845.1	industrial	processing	food_sample	food | Pathogen |	PRJNA224116	SAMN17777228	Colony258	Missing	Thailand
GCF_019264785.1	industrial	processing	food_sample	food | Pathogen |	PRJNA224116	SAMN17777230	Colony319	Missing	Thailand
GCF_019264805.1	industrial	processing	food_sample	food | Pathogen |	PRJNA224116	SAMN17777231	Colony271	Missing	Thailand
GCA_002332605.1	industrial	processing	metal	metal | Uncultivated Acinetobacter baumannii UBA2057 genome recovered from SRX822397 | UBA2057 | metagenomic assembly | terrestrial metagenome | This BioSample is a metagenomic assembly obtained from the terrestrial metagenome reads: SRR1749014. |	PRJNA348753	SAMN06452163	GCA_002332605.1	Missing	USA
GCA_027356985.1	industrial	processing	mine_drainage	sediment | MIMAG Metagenome-assembled Genome sample from Acinetobacter baumannii | clean83 | metagenomic assembly | not collected | not collected | not collected | mine drainage metagenome |	PRJNA834572	SAMN28404279	GCA_027356985.1	2016	China
GCF_039658635.1	industrial	processing	oil_reservoir	petroleum in presence of CO2 | Microbe sample from Acinetobacter baumannii | petroleum |	PRJNA224116	SAMN30674679	BD36	2017	Brazil
GCF_039658615.1	industrial	processing	oil_reservoir	petroleum in presence of CO2 | Microbe sample from Acinetobacter baumannii | petroleum |	PRJNA224116	SAMN30674680	BD37	2017	Brazil
GCF_039658595.1	industrial	processing	oil_reservoir	petroleum in presence of CO2 | Microbe sample from Acinetobacter baumannii | petroleum |	PRJNA224116	SAMN30674681	BD38	2017	Brazil
GCF_039658575.1	industrial	processing	oil_reservoir	petroleum in presence of CO2 | Microbe sample from Acinetobacter baumannii | petroleum |	PRJNA224116	SAMN30674683	BD43	2017	Brazil
GCF_026620155.1	industrial	processing	oil_reservoir	oil reservoir | MIGS Cultured Bacterial/Archaeal sample from Acinetobacter baumannii | terrestrial environment | oil reservoir | production water |	PRJNA224116	SAMN21897459	E7	2015	Brazil
GCA_039658555.1	industrial	processing	oil_reservoir	petroleum in presence of CO2 | Microbe sample from Acinetobacter baumannii | petroleum |	PRJNA765678	SAMN30674682	BD39	2017	Brazil
GCF_019903155.1	industrial	processing	paper_mill	paper mill kaolin | Pathogen |	PRJNA224116	SAMN15646564	E-011922	Missing	Finland
GCA_019903235.1	industrial	processing	paper_pulp	paper pulp mill | Pathogen |	PRJNA607827	SAMN15646565	E-072658	Missing	Finland
GCF_045065535.1	industrial	processing	food_sample	precooked food | Pathogen | missing | missing |	PRJNA224116	SAMN41177283	CCRI-14063	Missing	Missing
GCA_002386695.1	industrial	processing	wood	wood | Uncultivated Acinetobacter baumannii UBA4598 genome recovered from SRX822221 | UBA4598 | metagenomic assembly | terrestrial metagenome | This BioSample is a metagenomic assembly obtained from the terrestrial metagenome reads: SRR1748838. |	PRJNA348753	SAMN06452780	GCA_002386695.1	Missing	USA
GCA_002364895.1	industrial	processing	wood	wood | Uncultivated Acinetobacter baumannii UBA3169 genome recovered from SRX822194 | UBA3169 | metagenomic assembly | terrestrial metagenome | This BioSample is a metagenomic assembly obtained from the terrestrial metagenome reads: SRR1748811. |	PRJNA348753	SAMN06455687	GCA_002364895.1	Missing	USA
GCA_045170355.1	plant	crop	coconut_meat	Coconut meat [FOODON:00003856]; Ready-to-eat (RTE) [FOODON:03316636]; Food (chunks) [FOODON:00004555]; Food (frozen) [FOODON:03302148]; Retail environment [ENVO:01001448] | One Health Enteric sample from Acinetobacter baumannii | WP4.2_ Frozen stone fruit | Survey study [GENEPIO:0100582] | Food (chunks) [FOODON:00004555] | Coconut meat [FOODON:00003856]; Ready-to-eat (RTE) [FOODON:03316636] | Coc…	PRJNA514245	SAMN41558481	CFIARB20230259	2023	Canada
GCA_045170345.1	plant	crop	coconut_meat	Coconut meat [FOODON:00003856]; Ready-to-eat (RTE) [FOODON:03316636]; Food (chunks) [FOODON:00004555]; Food (frozen) [FOODON:03302148]; Retail environment [ENVO:01001448] | One Health Enteric sample from Acinetobacter baumannii | WP4.2_ Frozen stone fruit | Survey study [GENEPIO:0100582] | Food (shredded) [FOODON:00004553] | Coconut meat [FOODON:00003856]; Ready-to-eat (RTE) [FOODON:03316636] | C…	PRJNA514245	SAMN41558524	CFIARB20230478	2023	Canada
GCA_045170325.1	plant	crop	coconut_meat	Coconut meat [FOODON:00003856]; Ready-to-eat (RTE) [FOODON:03316636]; Food (chunks) [FOODON:00004555]; Food (frozen) [FOODON:03302148]; Retail environment [ENVO:01001448] | One Health Enteric sample from Acinetobacter baumannii | WP4.2_ Frozen stone fruit | Survey study [GENEPIO:0100582] | Food (shredded) [FOODON:00004553] | Coconut meat [FOODON:00003856]; Ready-to-eat (RTE) [FOODON:03316636] | C…	PRJNA514245	SAMN41558509	CFIARB20230109	2023	Canada
GCA_045170265.1	plant	crop	coconut_meat	Coconut meat [FOODON:00003856]; Ready-to-eat (RTE) [FOODON:03316636]; Food (chunks) [FOODON:00004555]; Food (frozen) [FOODON:03302148]; Retail environment [ENVO:01001448] | One Health Enteric sample from Acinetobacter baumannii | WP4.2_ Frozen stone fruit | Survey study [GENEPIO:0100582] | Food (shredded) [FOODON:00004553] | Coconut meat [FOODON:00003856]; Ready-to-eat (RTE) [FOODON:03316636] | C…	PRJNA514245	SAMN41558501	CFIARB20230078	2023	Canada
GCA_045170195.1	plant	crop	coconut_meat	Coconut meat [FOODON:00003856]; Ready-to-eat (RTE) [FOODON:03316636]; Food (chunks) [FOODON:00004555]; Food (frozen) [FOODON:03302148]; Retail environment [ENVO:01001448] | One Health Enteric sample from Acinetobacter baumannii | WP4.2_ Frozen stone fruit | Survey study [GENEPIO:0100582] | Food (chunks) [FOODON:00004555] | Coconut meat [FOODON:00003856]; Ready-to-eat (RTE) [FOODON:03316636] | Coc…	PRJNA514245	SAMN41558484	CFIARB20230262	2023	Canada
GCA_045170025.1	plant	crop	coconut_meat	Coconut meat [FOODON:00003856]; Ready-to-eat (RTE) [FOODON:03316636]; Food (chunks) [FOODON:00004555]; Food (frozen) [FOODON:03302148]; Retail environment [ENVO:01001448] | One Health Enteric sample from Acinetobacter baumannii | WP4.2_ Frozen stone fruit | Survey study [GENEPIO:0100582] | Food (chunks) [FOODON:00004555] | Coconut meat [FOODON:00003856]; Ready-to-eat (RTE) [FOODON:03316636] | Coc…	PRJNA514245	SAMN41558489	CFIARB20230267	2023	Canada
GCF_009740145.1	plant	crop	cucumber_rhizosphere	cucumber rhizosphere | Microbe sample from Acinetobacter baumannii XL380 | cell culture |	PRJNA224116	SAMN13476302	XL380	2018	China
GCA_045170245.1	plant	crop	peach	Peach [FOODON:00002485]; Ready-to-eat (RTE) [FOODON:03316636]; Food (sliced) [FOODON:00002455]; Food (frozen) [FOODON:03302148]; Retail environment [ENVO:01001448] | One Health Enteric sample from Acinetobacter baumannii | WP4.2_ Frozen stone fruit | Survey study [GENEPIO:0100582] | Food (sliced) [FOODON:00002455] | Peach [FOODON:00002485]; Ready-to-eat (RTE) [FOODON:03316636] | Peach [FOODON:000…	PRJNA514245	SAMN41558554	CFIARB20230183	2023	Canada
GCA_045170185.1	plant	crop	peach	Peach [FOODON:00002485]; Ready-to-eat (RTE) [FOODON:03316636]; Food (sliced) [FOODON:00002455]; Food (frozen) [FOODON:03302148]; Retail environment [ENVO:01001448] | One Health Enteric sample from Acinetobacter baumannii | WP4.2_ Frozen stone fruit | Survey study [GENEPIO:0100582] | Food (sliced) [FOODON:00002455] | Peach [FOODON:00002485]; Ready-to-eat (RTE) [FOODON:03316636] | Peach [FOODON:000…	PRJNA514245	SAMN41558553	CFIARB20230182	2023	Canada
GCA_045170165.1	plant	crop	peach	Peach [FOODON:00002485]; Ready-to-eat (RTE) [FOODON:03316636]; Food (sliced) [FOODON:00002455]; Food (frozen) [FOODON:03302148]; Retail environment [ENVO:01001448] | One Health Enteric sample from Acinetobacter baumannii | WP4.2_ Frozen stone fruit | Survey study [GENEPIO:0100582] | Food (sliced) [FOODON:00002455] | Peach [FOODON:00002485]; Ready-to-eat (RTE) [FOODON:03316636] | Peach [FOODON:000…	PRJNA514245	SAMN41558551	CFIARB20230180	2023	Canada
GCA_045170105.1	plant	crop	peach	Peach [FOODON:00002485]; Ready-to-eat (RTE) [FOODON:03316636]; Food (sliced) [FOODON:00002455]; Food (frozen) [FOODON:03302148]; Retail environment [ENVO:01001448] | One Health Enteric sample from Acinetobacter baumannii | WP4.2_ Frozen stone fruit | Survey study [GENEPIO:0100582] | Food (sliced) [FOODON:00002455] | Peach [FOODON:00002485]; Ready-to-eat (RTE) [FOODON:03316636] | Peach [FOODON:000…	PRJNA514245	SAMN41558550	CFIARB20230179	2023	Canada
GCA_017193455.1	plant	crop	undefined_leaf	AO22 | Acinetobacter baumannii | not applicable | organic feature | organic baby leaf mix | Genome sequencing of antibiotic resistant bacteria from vegetables |	PRJNA514245	SAMD00230589	AO22	2015	Japan
GCF_033612615.1	plant	other	undefined_plant	missing | Microbe sample from Acinetobacter baumannii | Plant | cell culture |	PRJNA224116	SAMN38047912	JBAB	2022	South Korea
GCF_022466815.1	plant	other	guayule	Plant microbiota | Microbe sample from Acinetobacter baumannii | cell culture |	PRJNA224116	SAMN25131677	DSM30011-VUB	1944	USA
GCA_028438155.1	plant	other	undefined_root	plant root | Microbe sample from Acinetobacter baumannii | cell culture |	PRJNA862736	SAMN29993306	U17-HoPe-P1-1	2017	Germany
GCA_028438125.1	plant	other	undefined_root	plant root | Microbe sample from Acinetobacter baumannii | cell culture |	PRJNA862736	SAMN29993309	U17-HoPe-P3-2	2017	Germany
GCA_028438115.1	plant	other	undefined_root	plant root | Microbe sample from Acinetobacter baumannii | cell culture |	PRJNA862736	SAMN29993308	U17-HoPe-P3-1	2017	Germany
GCA_028438065.1	plant	other	undefined_root	plant root | Microbe sample from Acinetobacter baumannii | cell culture |	PRJNA862736	SAMN29993313	U17-HoPeP5-1	2017	Germany
GCF_002727055.2	plant	other	Aeschynomene_fluminensis_root	inner root | Genome of Acinetobacter baumannii strain I43, a mercury resistant bacteria | Aeschynomene fluminensis | tissue sample | Pantanal | Inner root |	PRJNA224116	SAMN07689236	I43	2014	Brazil
GCA_028442505.1	plant	other	Epilobium_root_compost	root on compost | Microbe sample from Acinetobacter baumannii | Epilobium | cell culture |	PRJNA862736	SAMN29993160	17-ZW-P5-2	2017	Germany
GCF_004194555.1	plant	other	guayule	aerobic microbial decomposition of whole and defoliated guayule (retting) | Microbe sample from Acinetobacter baumannii | Parthenium argentatum Gray (guayule shrubs) | bacterial cell culture |	PRJNA224116	SAMN08513260	NCIMB 8209	1943	USA
GCA_028447565.1	plant	other	nettle_root	plant root | Microbe sample from Acinetobacter baumannii | Urtica dioica | cell culture |	PRJNA862736	SAMN30078474	U20-Benz-P2-3	2020	Germany
GCA_028447545.1	plant	other	nettle_root	plant root | Microbe sample from Acinetobacter baumannii | Urtica dioica | cell culture |	PRJNA862736	SAMN30078473	U20-Benz-P2-1	2020	Germany
GCA_028443535.1	plant	other	undefined_root	plant root | Microbe sample from Acinetobacter baumannii | Plant | cell culture |	PRJNA862736	SAMN29993107	17-HoPe_P1-2	2017	Germany
GCA_028443525.1	plant	other	undefined_root	plant root | Microbe sample from Acinetobacter baumannii | Plant | cell culture |	PRJNA862736	SAMN29993108	17-HoPe_P12-1	2017	Germany
GCA_028443485.1	plant	other	undefined_root	plant root | Microbe sample from Acinetobacter baumannii | Plant | cell culture |	PRJNA862736	SAMN29993109	17-HoPe_P2-2	2017	Germany
GCA_028441975.1	plant	other	undefined_root	plant root | Microbe sample from Acinetobacter baumannii | cell culture |	PRJNA862736	SAMN29993186	18-CSP68-2	2018	Poland
GCA_028438175.1	plant	other	undefined_root	plant root | Microbe sample from Acinetobacter baumannii | cell culture |	PRJNA862736	SAMN29993307	U17-HoPe-P2-1	2017	Germany
GCA_028438105.1	plant	other	undefined_root	plant root | Microbe sample from Acinetobacter baumannii | cell culture |	PRJNA862736	SAMN29993310	U17-HoPe-P3-3	2017	Germany

## Sheet: Metadata used to define categor
id	isolation source	name	host	isolate	sample type	host disease	broad-scale environmental context	local-scale environmental context	environmental medium	host tissue sampled	metagenome source	project name	purpose of sampling	value	food processing method	food product type	food source	sample material processing	sequenced by	source type	diagnosis	food container or wrapping	food preservation process	perturbation
GCF_040698405.1	Fish gills	Fish gills	fish	-	-	not applicable	-	-	-	-	-	-	-	-	-	-	-	-	-	-	-	-	-	-
GCF_036441095.1	missing	Pathogen	fish	-	-	-	-	-	-	-	-	-	-	-	-	-	-	-	-	-	-	-	-	-
GCF_040698685.1	Wound swab	Dog	dog	-	-	not applicable	-	-	-	-	-	-	-	-	-	-	-	-	-	-	-	-	-	-
GCF_038442635.1	urine	F14-11	cat	not applicable	-	UTI	-	-	-	-	-	-	-	-	-	-	-	-	-	-	-	-	-	-
GCF_038442585.1	urine	F15-01A	cat	not applicable	-	UTI	-	-	-	-	-	-	-	-	-	-	-	-	-	-	-	-	-	-
GCF_038442575.1	urine	F15-01B	cat	not applicable	-	UTI	-	-	-	-	-	-	-	-	-	-	-	-	-	-	-	-	-	-
GCF_038442565.1	urine	F15-02	cat	not applicable	-	UTI	-	-	-	-	-	-	-	-	-	-	-	-	-	-	-	-	-	-
GCF_038442555.1	urine	F15-06	cat	not applicable	-	UTI	-	-	-	-	-	-	-	-	-	-	-	-	-	-	-	-	-	-
GCF_038442425.1	urine	F16-05	cat	not applicable	-	UTI	-	-	-	-	-	-	-	-	-	-	-	-	-	-	-	-	-	-
GCF_038442415.1	urine	F18-02	cat	not applicable	-	UTI	-	-	-	-	-	-	-	-	-	-	-	-	-	-	-	-	-	-
GCF_038442405.1	urine	F19-02	cat	not applicable	-	UTI	-	-	-	-	-	-	-	-	-	-	-	-	-	-	-	-	-	-
GCF_038442395.1	urine	F19-10-2	cat	not applicable	-	UTI	-	-	-	-	-	-	-	-	-	-	-	-	-	-	-	-	-	-
GCF_038442385.1	urine	F19-10-4	cat	not applicable	-	UTI	-	-	-	-	-	-	-	-	-	-	-	-	-	-	-	-	-	-
GCF_038442375.1	urine	F19-10-8	cat	not applicable	-	UTI	-	-	-	-	-	-	-	-	-	-	-	-	-	-	-	-	-	-
GCF_038442305.1	urine	F19-10-9	cat	not applicable	-	UTI	-	-	-	-	-	-	-	-	-	-	-	-	-	-	-	-	-	-
GCF_038442295.1	urine	F19-10-MH6	cat	not applicable	-	UTI	-	-	-	-	-	-	-	-	-	-	-	-	-	-	-	-	-	-
GCF_038442285.1	urine	F19-10-MH12	cat	not applicable	-	UTI	-	-	-	-	-	-	-	-	-	-	-	-	-	-	-	-	-	-
GCF_038442275.1	urine	F19-10-CH3	cat	not applicable	-	UTI	-	-	-	-	-	-	-	-	-	-	-	-	-	-	-	-	-	-
GCF_038442265.1	urine	F19-10-CH6	cat	not applicable	-	UTI	-	-	-	-	-	-	-	-	-	-	-	-	-	-	-	-	-	-
GCF_038442235.1	urine	F19-10-CH8	cat	not applicable	-	UTI	-	-	-	-	-	-	-	-	-	-	-	-	-	-	-	-	-	-
GCF_038442225.1	urine	40288-CIRI	dog	not applicable	-	Urinary Tract Infection	-	-	-	-	-	-	-	-	-	-	-	-	-	-	-	-	-	-
GCF_030678675.1	missing	Pathogen	cat	-	-	-	-	-	-	-	-	-	-	-	-	-	-	-	-	-	-	-	-	-
GCF_030377845.1	not determined	Microbe sample from Acinetobacter baumannii	cat	not applicable	bacterial sample	-	-	-	-	-	-	-	-	-	-	-	-	-	-	-	-	-	-	-
GCF_030377815.1	body fluid	Microbe sample from Acinetobacter baumannii	cat	not applicable	bacterial sample	-	-	-	-	-	-	-	-	-	-	-	-	-	-	-	-	-	-	-
GCF_030377785.1	urine	Microbe sample from Acinetobacter baumannii	cat	not applicable	bacterial sample	-	-	-	-	-	-	-	-	-	-	-	-	-	-	-	-	-	-	-
GCF_030377745.1	wound	Microbe sample from Acinetobacter baumannii	dog	not applicable	bacterial sample	-	-	-	-	-	-	-	-	-	-	-	-	-	-	-	-	-	-	-
GCF_030377725.1	wound	Microbe sample from Acinetobacter baumannii	dog	not applicable	bacterial sample	-	-	-	-	-	-	-	-	-	-	-	-	-	-	-	-	-	-	-
GCF_030377705.1	urine	Microbe sample from Acinetobacter baumannii	cat	not applicable	bacterial sample	-	-	-	-	-	-	-	-	-	-	-	-	-	-	-	-	-	-	-
GCF_030377665.1	urine	Microbe sample from Acinetobacter baumannii	cat	not applicable	bacterial sample	-	-	-	-	-	-	-	-	-	-	-	-	-	-	-	-	-	-	-
GCF_030377605.1	eye swab	Microbe sample from Acinetobacter baumannii	dog	not applicable	bacterial sample	-	-	-	-	-	-	-	-	-	-	-	-	-	-	-	-	-	-	-
GCF_030377575.1	pus	Microbe sample from Acinetobacter baumannii	cat	not applicable	bacterial sample	-	-	-	-	-	-	-	-	-	-	-	-	-	-	-	-	-	-	-
GCF_030377535.1	respiratory sample	Microbe sample from Acinetobacter baumannii	dog	not applicable	bacterial sample	-	-	-	-	-	-	-	-	-	-	-	-	-	-	-	-	-	-	-
GCF_030377475.1	eye swab	Microbe sample from Acinetobacter baumannii	dog	not applicable	bacterial sample	-	-	-	-	-	-	-	-	-	-	-	-	-	-	-	-	-	-	-
GCF_030377445.1	wound	Microbe sample from Acinetobacter baumannii	dog	not applicable	bacterial sample	-	-	-	-	-	-	-	-	-	-	-	-	-	-	-	-	-	-	-
GCF_030377375.1	urine	Microbe sample from Acinetobacter baumannii	cat	not applicable	bacterial sample	-	-	-	-	-	-	-	-	-	-	-	-	-	-	-	-	-	-	-
GCF_030377365.1	urine	Microbe sample from Acinetobacter baumannii	cat	not applicable	bacterial sample	-	-	-	-	-	-	-	-	-	-	-	-	-	-	-	-	-	-	-
GCF_030377345.1	urine	Microbe sample from Acinetobacter baumannii	cat	not applicable	bacterial sample	-	-	-	-	-	-	-	-	-	-	-	-	-	-	-	-	-	-	-
GCF_030377315.1	urine	Microbe sample from Acinetobacter baumannii	cat	not applicable	bacterial sample	-	-	-	-	-	-	-	-	-	-	-	-	-	-	-	-	-	-	-
GCF_030377305.1	urine	Microbe sample from Acinetobacter baumannii	cat	not applicable	bacterial sample	-	-	-	-	-	-	-	-	-	-	-	-	-	-	-	-	-	-	-
GCF_030377285.1	wound	Microbe sample from Acinetobacter baumannii	dog	not applicable	bacterial sample	-	-	-	-	-	-	-	-	-	-	-	-	-	-	-	-	-	-	-
GCF_030377225.1	urine	Microbe sample from Acinetobacter baumannii	dog	not applicable	bacterial sample	-	-	-	-	-	-	-	-	-	-	-	-	-	-	-	-	-	-	-
GCF_030377205.1	urine	Microbe sample from Acinetobacter baumannii	cat	not applicable	bacterial sample	-	-	-	-	-	-	-	-	-	-	-	-	-	-	-	-	-	-	-
GCF_030377175.1	urine	Microbe sample from Acinetobacter baumannii	cat	not applicable	bacterial sample	-	-	-	-	-	-	-	-	-	-	-	-	-	-	-	-	-	-	-
GCF_030377145.1	urine	Microbe sample from Acinetobacter baumannii	dog	not applicable	bacterial sample	-	-	-	-	-	-	-	-	-	-	-	-	-	-	-	-	-	-	-
GCF_030377105.1	urine	Microbe sample from Acinetobacter baumannii	cat	not applicable	bacterial sample	-	-	-	-	-	-	-	-	-	-	-	-	-	-	-	-	-	-	-
GCF_030377095.1	urine	Microbe sample from Acinetobacter baumannii	dog	not applicable	bacterial sample	-	-	-	-	-	-	-	-	-	-	-	-	-	-	-	-	-	-	-
GCF_030377085.1	respiratory sample	Microbe sample from Acinetobacter baumannii	cat	not applicable	bacterial sample	-	-	-	-	-	-	-	-	-	-	-	-	-	-	-	-	-	-	-
GCF_019457715.1	urine	Pathogen	Canis lupus	-	-	Urinary Tract Infection	-	-	-	-	-	-	-	-	-	-	-	-	-	-	-	-	-	-
GCF_018831465.1	Animal (cat)	Pathogen	-	-	-	-	-	-	-	-	-	-	-	-	-	-	-	-	-	-	-	-	-	-
GCF_012974845.1	urine	Pathogen	Canis lupus familiaris	-	-	Urinary tract infection	-	-	-	-	-	-	-	-	-	-	-	-	-	-	-	-	-	-
GCF_004153595.1	urine	Microbe sample from Acinetobacter baumannii	dog	-	urine sample	-	-	-	-	-	-	-	-	-	-	-	-	-	-	-	-	-	-	-
GCF_003056525.1	pets	ACB213	-	-	cell culture	-	-	-	-	-	-	-	-	-	-	-	-	-	-	-	-	-	-	-
GCF_003056515.1	pets	ACB115	-	-	cell culture	-	-	-	-	-	-	-	-	-	-	-	-	-	-	-	-	-	-	-
GCF_003056505.1	pets	ACB92	-	-	cell culture	-	-	-	-	-	-	-	-	-	-	-	-	-	-	-	-	-	-	-
GCF_003056475.1	pets	ACB87	-	-	cell culture	-	-	-	-	-	-	-	-	-	-	-	-	-	-	-	-	-	-	-
GCF_003056465.1	pets	ACB108	-	-	cell culture	-	-	-	-	-	-	-	-	-	-	-	-	-	-	-	-	-	-	-
GCF_002367895.1	-	Microbe sample from Acinetobacter baumannii	grey parrot	-	tissue sample	-	-	-	-	nose	-	-	-	-	-	-	-	-	-	-	-	-	-	-
GCF_001704705.1	-	Microbe sample from Acinetobacter baumannii	dog	-	tissue sample	-	-	-	-	skin	-	-	-	-	-	-	-	-	-	-	Pyodermie	-	-	-
GCF_001704675.1	-	Microbe sample from Acinetobacter baumannii	dog	-	tissue sample	-	-	-	-	vagina	-	-	-	-	-	-	-	-	-	-	-	-	-	-
GCF_001657725.1	-	Microbe sample from Acinetobacter baumannii	cat	-	urine	-	-	-	-	urine	-	-	-	-	-	-	-	-	-	-	-	-	-	-
GCA_028438605.1	-	Microbe sample from Acinetobacter baumannii	Canis lupus familiaris	-	cell culture	-	-	-	-	-	-	-	-	-	-	-	-	-	-	-	-	-	-	-
GCA_024542435.1	Punctate abdominal cavity	Pathogen	-	Dog	-	-	-	-	-	-	-	-	-	-	-	-	-	-	-	-	-	-	-	-
GCA_024483005.1	Phlegmone	Sequencing of Acinetobacter baumannii	-	Cat	-	-	-	-	-	-	-	-	-	-	-	-	-	-	-	-	-	-	-	-
GCA_024482585.1	bronchoalveolar lavage	Sequencing of Acinetobacter baumannii	-	Dog	-	-	-	-	-	-	-	-	-	-	-	-	-	-	-	-	-	-	-	-
GCA_024481545.1	Central venous catheter	Pathogen	-	Dog	-	-	-	-	-	-	-	-	-	-	-	-	-	-	-	-	-	-	-	-
GCA_024481525.1	Swab throat	Pathogen	-	Cat	-	-	-	-	-	-	-	-	-	-	-	-	-	-	-	-	-	-	-	-
GCA_024481485.1	Central venous catheter	Pathogen	-	Cat	-	-	-	-	-	-	-	-	-	-	-	-	-	-	-	-	-	-	-	-
GCA_024481425.1	wound	Pathogen	-	Dog	-	-	-	-	-	-	-	-	-	-	-	-	-	-	-	-	-	-	-	-
GCA_024481385.1	skin	Sequencing of Acinetobacter baumannii	-	Cat	-	-	-	-	-	-	-	-	-	-	-	-	-	-	-	-	-	-	-	-
GCA_024480825.1	ear	Pathogen	-	Dog	-	-	-	-	-	-	-	-	-	-	-	-	-	-	-	-	-	-	-	-
GCA_024480805.1	urine	Pathogen	-	Cat	-	-	-	-	-	-	-	-	-	-	-	-	-	-	-	-	-	-	-	-
GCA_024480625.1	urine	Pathogen	-	Dog	-	-	-	-	-	-	-	-	-	-	-	-	-	-	-	-	-	-	-	-
GCA_024480345.1	urine	Pathogen	-	Cat	-	-	-	-	-	-	-	-	-	-	-	-	-	-	-	-	-	-	-	-
GCA_024480325.1	Swab knee	Pathogen	-	Dog	-	-	-	-	-	-	-	-	-	-	-	-	-	-	-	-	-	-	-	-
GCA_024480305.1	bronchoalveolar lavage	Pathogen	-	Dog	-	-	-	-	-	-	-	-	-	-	-	-	-	-	-	-	-	-	-	-
GCA_024480285.1	Swab teats	Pathogen	-	Cat	-	-	-	-	-	-	-	-	-	-	-	-	-	-	-	-	-	-	-	-
GCA_024480265.1	urine	Pathogen	-	Cat	-	-	-	-	-	-	-	-	-	-	-	-	-	-	-	-	-	-	-	-
GCA_024480245.1	urine	Pathogen	-	Dog	-	-	-	-	-	-	-	-	-	-	-	-	-	-	-	-	-	-	-	-
GCA_024480225.1	Central venous catheter	Sequencing of Acinetobacter baumannii	-	Dog	-	-	-	-	-	-	-	-	-	-	-	-	-	-	-	-	-	-	-	-
GCA_016496845.1	airway	212060000000	Canis lupus familiaris	212060000000	-	-	-	-	-	-	-	-	-	-	-	-	-	-	-	-	-	-	-	-
GCA_016496805.1	urine	212080000000	Canis lupus familiaris	212080000000	-	-	-	-	-	-	-	-	-	-	-	-	-	-	-	-	-	-	-	-
GCA_016496745.1	wound	214030000000	Canis lupus familiaris	214030000000	-	-	-	-	-	-	-	-	-	-	-	-	-	-	-	-	-	-	-	-
GCA_016496705.1	surface	214030000000	Canis lupus familiaris	214030000000	-	-	-	-	-	-	-	-	-	-	-	-	-	-	-	-	-	-	-	-
GCA_016496685.1	surface	UKG-Inl-T1-1N-1	Canis lupus familiaris	UKG-Inl-T1-1N-1	-	-	-	-	-	-	-	-	-	-	-	-	-	-	-	-	-	-	-	-
GCA_016496645.1	surface	UKG-Inl-T1-4N-2	Canis lupus familiaris	UKG-Inl-T1-4N-2	-	-	-	-	-	-	-	-	-	-	-	-	-	-	-	-	-	-	-	-
GCF_044005605.1	-	Microbe sample from Acinetobacter baumannii	sheep	-	cell culture	-	-	-	-	-	-	-	-	-	-	-	-	-	-	-	-	-	-	-
GCF_041801535.1	Temperate monsoon climate	Pathogen	chickens	-	-	Endocarditis	-	-	-	-	-	-	-	-	-	-	-	-	-	-	-	-	-	-
GCF_034083075.1	throat swab	Pathogen	chicken	-	-	Healthy animal	-	-	-	-	-	-	-	-	-	-	-	-	-	-	-	-	-	-
GCF_034081005.1	throat swab	Pathogen	chicken	-	-	Healthy animal	-	-	-	-	-	-	-	-	-	-	-	-	-	-	-	-	-	-
GCF_030168265.1	-	Acinetobacter baumannii 51248 from fecal swab	Bos taurus	-	-	-	livestock-associated habitat	feedlot	feces	-	-	-	-	-	-	-	-	Samples were collected by using foam-tipped swabs (VWR International, Buffalo Grove, IL) and swabbing an area (3 by 5 cm) inside the anal canal of each animal. Swabs were immediately placed into a 15-ml conical tube containing 4 ml of tryptic soy broth (TSB)‚ÄìPO4 (TSB [Sigma, St. Louis, MO] 30 g, KH2PO4 2.13 g, K2HPO4 12.54 g/liter, final pH of 7.2 as described in https://doi.org/10.4315/0362-02…	-	-	-	-	-	calf trailer transport from from USA:KY to USA:KS occurring between day 0 and day 1
GCF_029909475.1	Feedlot Water bowl	Microbe sample from Acinetobacter baumannii	-	missing	Cell culture	-	Feedlot	-	-	-	-	-	-	-	-	-	-	-	-	-	-	-	-	-
GCF_023499095.1	fecal sample	Pathogen	Bos taurus	-	-	not applicable	-	-	-	-	-	-	-	-	-	-	-	-	-	-	-	-	-	-
GCF_023498995.1	fecal sample	Pathogen	Sus scrofa domesticus	-	-	not applicable	-	-	-	-	-	-	-	-	-	-	-	-	-	-	-	-	-	-
GCF_023498955.1	fecal sample	Pathogen	Sus scrofa domesticus	-	-	not applicable	-	-	-	-	-	-	-	-	-	-	-	-	-	-	-	-	-	-
GCF_023498905.1	fecal sample	Pathogen	Sus scrofa domesticus	-	-	not applicable	-	-	-	-	-	-	-	-	-	-	-	-	-	-	-	-	-	-
GCF_023498895.1	fecal sample	Pathogen	Sus scrofa domesticus	-	-	not applicable	-	-	-	-	-	-	-	-	-	-	-	-	-	-	-	-	-	-
GCF_023498875.1	fecal sample	Pathogen	Sus scrofa domesticus	-	-	not applicable	-	-	-	-	-	-	-	-	-	-	-	-	-	-	-	-	-	-
GCF_015676875.1	swab	Pathogen	Sus scrofa domesticus	-	-	missing	-	-	-	-	-	-	-	-	-	-	-	-	-	-	-	-	-	-
GCF_015676835.1	swab	Pathogen	Sus scrofa domesticus	-	-	missing	-	-	-	-	-	-	-	-	-	-	-	-	-	-	-	-	-	-
GCF_015676635.1	swab	Pathogen	Sus scrofa domesticus	-	-	missing	-	-	-	-	-	-	-	-	-	-	-	-	-	-	-	-	-	-
GCF_015676585.1	swab	Pathogen	Sus scrofa domesticus	-	-	missing	-	-	-	-	-	-	-	-	-	-	-	-	-	-	-	-	-	-
GCF_013346455.1	feces	Pathogen	Sus scrofa	-	-	missing	-	-	-	-	-	-	-	-	-	-	-	-	-	-	-	-	-	-
GCF_013346445.1	feces	Pathogen	Sus scrofa	-	-	missing	-	-	-	-	-	-	-	-	-	-	-	-	-	-	-	-	-	-
GCF_004153295.1	manure	Microbe sample from Acinetobacter baumannii	Bos taurus	-	whole organism	-	-	-	-	-	-	-	-	-	-	-	-	-	-	-	-	-	-	-
GCF_004152785.1	manure	Microbe sample from Acinetobacter baumannii	Bos taurus	-	whole organism	-	-	-	-	-	-	-	-	-	-	-	-	-	-	-	-	-	-	-
GCF_004152715.1	manure	Microbe sample from Acinetobacter baumannii	Bos taurus	-	whole organism	-	-	-	-	-	-	-	-	-	-	-	-	-	-	-	-	-	-	-
GCF_004152685.1	manure	Microbe sample from Acinetobacter baumannii	Bos taurus	-	whole organism	-	-	-	-	-	-	-	-	-	-	-	-	-	-	-	-	-	-	-
GCF_003994455.1	feces	Pathogen	pig	-	-	colonization	-	-	-	-	-	-	-	-	-	-	-	-	-	-	-	-	-	-
GCF_002573795.1	-	Microbe sample from Acinetobacter baumannii	chicken	-	environmental sample	-	-	-	-	-	-	-	-	-	-	-	-	-	-	-	-	-	-	-
GCF_001693115.1	-	Microbe sample from Acinetobacter baumannii	chicken	-	tissue sample	-	-	-	-	choana	-	-	-	-	-	-	-	-	-	-	-	-	-	-
GCA_028447355.1	duck hatchery air sample	Microbe sample from Acinetobacter baumannii	-	-	cell culture	-	-	-	-	-	-	-	-	-	-	-	-	-	-	-	-	-	-	-
GCA_028447315.1	missing	Microbe sample from Acinetobacter baumannii	Gallus gallus	-	cell culture	-	-	-	-	-	-	-	-	-	-	-	-	-	-	-	-	-	-	-
GCA_028447285.1	missing	Microbe sample from Acinetobacter baumannii	Gallus gallus	-	cell culture	-	-	-	-	-	-	-	-	-	-	-	-	-	-	-	-	-	-	-
GCA_028446505.1	missing	Microbe sample from Acinetobacter baumannii	Gallus gallus	-	cell culture	-	-	-	-	-	-	-	-	-	-	-	-	-	-	-	-	-	-	-
GCA_028445625.1	-	Microbe sample from Acinetobacter baumannii	Meleagris gallopavo	-	cell culture	-	-	-	-	-	-	-	-	-	-	-	-	-	-	-	-	-	-	-
GCA_028445565.1	-	Microbe sample from Acinetobacter baumannii	Meleagris gallopavo	-	cell culture	-	-	-	-	-	-	-	-	-	-	-	-	-	-	-	-	-	-	-
GCA_028438905.1	-	Microbe sample from Acinetobacter baumannii	Sus scrofa domesticus	-	cell culture	-	-	-	-	-	-	-	-	-	-	-	-	-	-	-	-	-	-	-
GCA_028438805.1	-	Microbe sample from Acinetobacter baumannii	Sus scrofa domesticus	-	cell culture	-	-	-	-	-	-	-	-	-	-	-	-	-	-	-	-	-	-	-
GCA_028438725.1	-	Microbe sample from Acinetobacter baumannii	Sus scrofa domesticus	-	cell culture	-	-	-	-	-	-	-	-	-	-	-	-	-	-	-	-	-	-	-
GCA_028438615.1	-	Microbe sample from Acinetobacter baumannii	Oryctolagus cuniculus	-	cell culture	-	-	-	-	-	-	-	-	-	-	-	-	-	-	-	-	-	-	-
GCA_028438535.1	-	Microbe sample from Acinetobacter baumannii	Oryctolagus cuniculus	-	cell culture	-	-	-	-	-	-	-	-	-	-	-	-	-	-	-	-	-	-	-
GCF_035788155.1	nasal swab	Microbe sample from Acinetobacter baumannii	Sus scrofa cristatus	-	Microbe Culture	-	-	-	-	-	-	-	-	-	-	-	-	-	-	-	-	-	-	-
GCF_035787775.1	milk	Microbe sample from Acinetobacter baumannii	Bos taurus indicus	-	Microbe Culture	-	-	-	-	-	-	-	-	-	-	-	-	-	-	-	-	-	-	-
GCF_035783195.1	rectal swab	Microbe sample from Acinetobacter baumannii	Sus scrofa cristatus	-	Microbe culture	-	-	-	-	-	-	-	-	-	-	-	-	-	-	-	-	-	-	-
GCF_023499155.1	fecal sample	Pathogen	Bos taurus	-	-	not applicable	-	-	-	-	-	-	-	-	-	-	-	-	-	-	-	-	-	-
GCF_023499105.1	fecal sample	Pathogen	Bos taurus	-	-	not applicable	-	-	-	-	-	-	-	-	-	-	-	-	-	-	-	-	-	-
GCF_023499085.1	fecal sample	Pathogen	Bos taurus	-	-	not applicable	-	-	-	-	-	-	-	-	-	-	-	-	-	-	-	-	-	-
GCF_023499075.1	fecal sample	Pathogen	Bos taurus	-	-	not applicable	-	-	-	-	-	-	-	-	-	-	-	-	-	-	-	-	-	-
GCF_023499055.1	fecal sample	Pathogen	Bos taurus	-	-	not applicable	-	-	-	-	-	-	-	-	-	-	-	-	-	-	-	-	-	-
GCF_023499035.1	Nostril sample	Pathogen	Bos taurus	-	-	not applicable	-	-	-	-	-	-	-	-	-	-	-	-	-	-	-	-	-	-
GCF_023499005.1	Nostril sample	Pathogen	Bos taurus	-	-	not applicable	-	-	-	-	-	-	-	-	-	-	-	-	-	-	-	-	-	-
GCF_023498975.1	fecal sample	Pathogen	Sus scrofa domesticus	-	-	not applicable	-	-	-	-	-	-	-	-	-	-	-	-	-	-	-	-	-	-
GCF_023498915.1	fecal sample	Pathogen	Sus scrofa domesticus	-	-	not applicable	-	-	-	-	-	-	-	-	-	-	-	-	-	-	-	-	-	-
GCF_008801795.1	conjunctivitis	Microbe sample from Acinetobacter baumannii	horse	-	Whole organism	-	-	-	-	-	-	-	-	-	-	-	-	-	-	-	-	-	-	-
GCF_046709205.1	Raw Milk	One Health Enteric sample from Acinetobacter baumannii	-	-	-	-	-	-	-	-	-	-	Survelleince of Antimicrobial resistant in raw milk	-	-	-	-	-	-	food	-	-	-	-
GCF_045798765.1	chicken meat	Pathogen	-	-	-	-	-	-	-	-	-	-	-	-	-	-	-	-	-	-	-	-	-	-
GCF_045798745.1	sheep meat	Pathogen	-	-	-	-	-	-	-	-	-	-	-	-	-	-	-	-	-	-	-	-	-	-
GCF_045798725.1	sheep meat	Pathogen	-	-	-	-	-	-	-	-	-	-	-	-	-	-	-	-	-	-	-	-	-	-
GCF_045798705.1	chicken meat	Pathogen	-	-	-	-	-	-	-	-	-	-	-	-	-	-	-	-	-	-	-	-	-	-
GCF_045798685.1	buffalo meat	Pathogen	-	-	-	-	-	-	-	-	-	-	-	-	-	-	-	-	-	-	-	-	-	-
GCF_045798665.1	buffalo meat	Pathogen	-	-	-	-	-	-	-	-	-	-	-	-	-	-	-	-	-	-	-	-	-	-
GCF_045798645.1	pig meat	Pathogen	-	-	-	-	-	-	-	-	-	-	-	-	-	-	-	-	-	-	-	-	-	-
GCF_045798625.1	pig meat	Pathogen	-	-	-	-	-	-	-	-	-	-	-	-	-	-	-	-	-	-	-	-	-	-
GCF_045798585.1	prawn tissue	Pathogen	-	-	-	-	-	-	-	-	-	-	-	-	-	-	-	-	-	-	-	-	-	-
GCF_045065635.1	milk	Pathogen	missing	-	-	missing	-	-	-	-	-	-	-	-	-	-	-	-	-	-	-	-	-	-
GCF_040698725.1	Retail chicken	Chicken	chicken	-	-	not applicable	-	-	-	-	-	-	-	-	-	-	-	-	-	-	-	-	-	-
GCF_040698705.1	Retail chicken	Chicken	chicken	-	-	not applicable	-	-	-	-	-	-	-	-	-	-	-	-	-	-	-	-	-	-
GCF_040698665.1	Retail chicken	Chicken	chicken	-	-	not applicable	-	-	-	-	-	-	-	-	-	-	-	-	-	-	-	-	-	-
GCF_040698635.1	Retail Pork	Pork	pig	-	-	not applicable	-	-	-	-	-	-	-	-	-	-	-	-	-	-	-	-	-	-
GCF_040698595.1	Retail pork	Pork	pig	-	-	not applicable	-	-	-	-	-	-	-	-	-	-	-	-	-	-	-	-	-	-
GCF_040698575.1	Retail pork	Pork	pig	-	-	not applicable	-	-	-	-	-	-	-	-	-	-	-	-	-	-	-	-	-	-
GCF_040698565.1	Retail Pork	Pork	pig	-	-	not applicable	-	-	-	-	-	-	-	-	-	-	-	-	-	-	-	-	-	-
GCF_040698495.1	Retail chicken	Chicken	chicken	-	-	not applicable	-	-	-	-	-	-	-	-	-	-	-	-	-	-	-	-	-	-
GCF_040698455.1	Retail chicken	Chicken	chicken	-	-	not applicable	-	-	-	-	-	-	-	-	-	-	-	-	-	-	-	-	-	-
GCF_032944255.1	Tankmilk	Microbe sample from Acinetobacter baumannii	-	Not collected	Whole Organism	-	-	-	-	-	-	-	-	-	-	-	-	-	-	-	-	-	-	-
GCF_032944235.1	Tankmilk	Microbe sample from Acinetobacter baumannii	-	Not collected	Whole Organism	-	-	-	-	-	-	-	-	-	-	-	-	-	-	-	-	-	-	-
GCF_032941715.1	Tankmilk	Microbe sample from Acinetobacter baumannii	-	Not collected	Whole Organism	-	-	-	-	-	-	-	-	-	-	-	-	-	-	-	-	-	-	-
GCF_032941655.1	Tankmilk	Microbe sample from Acinetobacter baumannii	-	Not collected	Whole Organism	-	-	-	-	-	-	-	-	-	-	-	-	-	-	-	-	-	-	-
GCF_032941635.1	Tankmilk	Microbe sample from Acinetobacter baumannii	-	Not collected	Whole Organism	-	-	-	-	-	-	-	-	-	-	-	-	-	-	-	-	-	-	-
GCF_032941605.1	Tankmilk	Microbe sample from Acinetobacter baumannii	-	Not collected	Whole Organism	-	-	-	-	-	-	-	-	-	-	-	-	-	-	-	-	-	-	-
GCF_032941395.1	Tankmilk	Microbe sample from Acinetobacter baumannii	-	Not collected	Whole Organism	-	-	-	-	-	-	-	-	-	-	-	-	-	-	-	-	-	-	-
GCF_032941345.1	Tankmilk	Microbe sample from Acinetobacter baumannii	-	Not collected	Whole Organism	-	-	-	-	-	-	-	-	-	-	-	-	-	-	-	-	-	-	-
GCF_032941335.1	Tankmilk	Microbe sample from Acinetobacter baumannii	-	Not collected	Whole Organism	-	-	-	-	-	-	-	-	-	-	-	-	-	-	-	-	-	-	-
GCF_032941245.1	Tankmilk	Microbe sample from Acinetobacter baumannii	-	Not collected	Whole Organism	-	-	-	-	-	-	-	-	-	-	-	-	-	-	-	-	-	-	-
GCF_032941225.1	Tankmilk	Microbe sample from Acinetobacter baumannii	-	Not collected	Whole Organism	-	-	-	-	-	-	-	-	-	-	-	-	-	-	-	-	-	-	-
GCF_027257815.1	-	Microbe sample from Acinetobacter baumannii	Meleagris gallopavo	-	culture	-	-	-	-	-	-	-	-	-	-	-	-	-	-	-	-	-	-	-
GCF_027257795.1	boot swab	Microbe sample from Acinetobacter baumannii	-	-	culture	-	-	-	-	-	-	-	-	-	-	-	-	-	-	-	-	-	-	-
GCF_027257765.1	chick-box-paper	Microbe sample from Acinetobacter baumannii	-	-	culture	-	-	-	-	-	-	-	-	-	-	-	-	-	-	-	-	-	-	-
GCF_027257755.1	chick-box-paper	Microbe sample from Acinetobacter baumannii	-	-	culture	-	-	-	-	-	-	-	-	-	-	-	-	-	-	-	-	-	-	-
GCF_027257735.1	chick-box-paper	Microbe sample from Acinetobacter baumannii	-	-	culture	-	-	-	-	-	-	-	-	-	-	-	-	-	-	-	-	-	-	-
GCF_027257695.1	chick-box-paper	Microbe sample from Acinetobacter baumannii	-	-	culture	-	-	-	-	-	-	-	-	-	-	-	-	-	-	-	-	-	-	-
GCF_027257675.1	chick-box-paper	Microbe sample from Acinetobacter baumannii	-	-	culture	-	-	-	-	-	-	-	-	-	-	-	-	-	-	-	-	-	-	-
GCF_027257665.1	chick-box-paper	Microbe sample from Acinetobacter baumannii	-	-	culture	-	-	-	-	-	-	-	-	-	-	-	-	-	-	-	-	-	-	-
GCF_027257655.1	chick-box-paper	Microbe sample from Acinetobacter baumannii	-	-	culture	-	-	-	-	-	-	-	-	-	-	-	-	-	-	-	-	-	-	-
GCF_027257635.1	chick-box-paper	Microbe sample from Acinetobacter baumannii	-	-	culture	-	-	-	-	-	-	-	-	-	-	-	-	-	-	-	-	-	-	-
GCF_027257615.1	chick-box-paper	Microbe sample from Acinetobacter baumannii	-	-	culture	-	-	-	-	-	-	-	-	-	-	-	-	-	-	-	-	-	-	-
GCF_027257595.1	chick-box-paper	Microbe sample from Acinetobacter baumannii	-	-	culture	-	-	-	-	-	-	-	-	-	-	-	-	-	-	-	-	-	-	-
GCF_027257575.1	chick-box-paper	Microbe sample from Acinetobacter baumannii	-	-	culture	-	-	-	-	-	-	-	-	-	-	-	-	-	-	-	-	-	-	-
GCF_027257555.1	chick-box-paper	Microbe sample from Acinetobacter baumannii	-	-	culture	-	-	-	-	-	-	-	-	-	-	-	-	-	-	-	-	-	-	-
GCF_027257525.1	chick-box-paper	Microbe sample from Acinetobacter baumannii	-	-	culture	-	-	-	-	-	-	-	-	-	-	-	-	-	-	-	-	-	-	-
GCF_027257515.1	chick-box-paper	Microbe sample from Acinetobacter baumannii	-	-	culture	-	-	-	-	-	-	-	-	-	-	-	-	-	-	-	-	-	-	-
GCF_027257495.1	chick-box-paper	Microbe sample from Acinetobacter baumannii	-	-	culture	-	-	-	-	-	-	-	-	-	-	-	-	-	-	-	-	-	-	-
GCF_027257475.1	chick-box-paper	Microbe sample from Acinetobacter baumannii	-	-	culture	-	-	-	-	-	-	-	-	-	-	-	-	-	-	-	-	-	-	-
GCF_027257445.1	chick-box-paper	Microbe sample from Acinetobacter baumannii	-	-	culture	-	-	-	-	-	-	-	-	-	-	-	-	-	-	-	-	-	-	-
GCF_027257435.1	chick-box-paper	Microbe sample from Acinetobacter baumannii	-	-	culture	-	-	-	-	-	-	-	-	-	-	-	-	-	-	-	-	-	-	-
GCF_027257415.1	chick-box-paper	Microbe sample from Acinetobacter baumannii	-	-	culture	-	-	-	-	-	-	-	-	-	-	-	-	-	-	-	-	-	-	-
GCF_027257385.1	chick-box-paper	Microbe sample from Acinetobacter baumannii	-	-	culture	-	-	-	-	-	-	-	-	-	-	-	-	-	-	-	-	-	-	-
GCF_027257375.1	chick-box-paper	Microbe sample from Acinetobacter baumannii	-	-	culture	-	-	-	-	-	-	-	-	-	-	-	-	-	-	-	-	-	-	-
GCF_027257355.1	chick-box-paper	Microbe sample from Acinetobacter baumannii	-	-	culture	-	-	-	-	-	-	-	-	-	-	-	-	-	-	-	-	-	-	-
GCF_027257305.1	chick-box-paper	Microbe sample from Acinetobacter baumannii	-	-	culture	-	-	-	-	-	-	-	-	-	-	-	-	-	-	-	-	-	-	-
GCF_027257275.1	boot swab	Microbe sample from Acinetobacter baumannii	-	-	culture	-	-	-	-	-	-	-	-	-	-	-	-	-	-	-	-	-	-	-
GCF_024705725.1	Tankmilk	Microbe sample from Acinetobacter baumannii	-	Not collected	Whole Organism	-	-	-	-	-	-	-	-	-	-	-	-	-	-	-	-	-	-	-
GCF_002573915.1	-	Microbe sample from Acinetobacter baumannii	goose	-	environmental sample	-	-	-	-	-	-	-	-	-	-	-	-	-	-	-	-	-	-	-
GCF_002573805.1	-	Microbe sample from Acinetobacter baumannii	turkey	-	environmental sample	-	-	-	-	-	-	-	-	-	-	-	-	-	-	-	-	-	-	-
GCA_028445025.1	-	Microbe sample from Acinetobacter baumannii	Mus musculus	-	cell culture	-	-	-	-	-	-	-	-	-	-	-	-	-	-	-	-	-	-	-
GCA_028444965.1	-	Microbe sample from Acinetobacter baumannii	Mus musculus	-	cell culture	-	-	-	-	-	-	-	-	-	-	-	-	-	-	-	-	-	-	-
GCF_008124045.1	mouse gut	Acinetobacter baumannii	-	-	-	-	-	-	-	-	-	-	-	-	-	-	-	-	-	-	-	-	-	-
GCF_030377795.1	respiratory sample	Microbe sample from Acinetobacter baumannii	horse	not applicable	bacterial sample	-	-	-	-	-	-	-	-	-	-	-	-	-	-	-	-	-	-	-
GCF_030377755.1	lymphatic glanglion	Microbe sample from Acinetobacter baumannii	horse	not applicable	bacterial sample	-	-	-	-	-	-	-	-	-	-	-	-	-	-	-	-	-	-	-
GCF_030377655.1	wound	Microbe sample from Acinetobacter baumannii	horse	not applicable	bacterial sample	-	-	-	-	-	-	-	-	-	-	-	-	-	-	-	-	-	-	-
GCF_030377635.1	not determined	Microbe sample from Acinetobacter baumannii	horse	not applicable	bacterial sample	-	-	-	-	-	-	-	-	-	-	-	-	-	-	-	-	-	-	-
GCF_030377625.1	wound	Microbe sample from Acinetobacter baumannii	horse	not applicable	bacterial sample	-	-	-	-	-	-	-	-	-	-	-	-	-	-	-	-	-	-	-
GCF_030377555.1	eye swab	Microbe sample from Acinetobacter baumannii	horse	not applicable	bacterial sample	-	-	-	-	-	-	-	-	-	-	-	-	-	-	-	-	-	-	-
GCF_030377525.1	wound	Microbe sample from Acinetobacter baumannii	horse	not applicable	bacterial sample	-	-	-	-	-	-	-	-	-	-	-	-	-	-	-	-	-	-	-
GCF_015571935.1	swab	Pathogen	Sus scrofa domesticus	-	-	missing	-	-	-	-	-	-	-	-	-	-	-	-	-	-	-	-	-	-
GCF_002753915.1	sheep brocho-alveolar lavage	Pathogen	Ovis aries	-	-	pneumonia	-	-	-	-	-	-	-	-	-	-	-	-	-	-	-	-	-	-
GCA_026473365.1	nasal cavity	Pathogen	Horse	IHIT42660	-	unknown	-	-	-	-	-	-	-	-	-	-	-	-	-	-	-	-	-	-
GCA_026473345.1	wound	Pathogen	Horse	IHIT38021	-	unknown	-	-	-	-	-	-	-	-	-	-	-	-	-	-	-	-	-	-
GCA_026473325.1	lymph node	Pathogen	Horse	IHIT38168	-	unknown	-	-	-	-	-	-	-	-	-	-	-	-	-	-	-	-	-	-
GCA_026473305.1	screw surgery	Pathogen	Horse	IHIT40381	-	unknown	-	-	-	-	-	-	-	-	-	-	-	-	-	-	-	-	-	-
GCA_026473265.1	wound	Pathogen	Horse	IHIT37442	-	unknown	-	-	-	-	-	-	-	-	-	-	-	-	-	-	-	-	-	-
GCA_026473125.1	cervix swab	Pathogen	Horse	IHIT32538	-	unknown	-	-	-	-	-	-	-	-	-	-	-	-	-	-	-	-	-	-
GCA_026473065.1	wound suture	Pathogen	Horse	IHIT31711	-	unknown	-	-	-	-	-	-	-	-	-	-	-	-	-	-	-	-	-	-
GCA_026473005.1	cervix swab	Pathogen	Horse	IHIT26873	-	unknown	-	-	-	-	-	-	-	-	-	-	-	-	-	-	-	-	-	-
GCA_026472985.1	feces	Pathogen	Horse	IHIT26669	-	unknown	-	-	-	-	-	-	-	-	-	-	-	-	-	-	-	-	-	-
GCA_026472945.1	wound	Pathogen	Horse	IHIT25667	-	unknown	-	-	-	-	-	-	-	-	-	-	-	-	-	-	-	-	-	-
GCA_026472925.1	feces	Pathogen	Horse	IHIT26023	-	unknown	-	-	-	-	-	-	-	-	-	-	-	-	-	-	-	-	-	-
GCA_026471705.1	eye	Pathogen	Horse	IHIT15773	-	unknown	-	-	-	-	-	-	-	-	-	-	-	-	-	-	-	-	-	-
GCF_041321005.1	embryos	Pathogen	duck	-	-	Dead embryos	-	-	-	-	-	-	-	-	-	-	-	-	-	-	-	-	-	-
GCF_021729465.1	stool	Pathogen	Duck	-	-	Not available	-	-	-	-	-	-	-	-	-	-	-	-	-	-	-	-	-	-
GCF_020271605.1	a feces sample of chicken origin	Pathogen	-	-	-	-	-	-	-	-	-	-	-	-	-	-	-	-	-	-	-	-	-	-
GCF_013394285.1	feces	Acinetobacter baumannii 29FS20 isolated from the feces of duck	duck	-	-	missing	-	-	-	-	-	-	-	-	-	-	-	-	-	-	-	-	-	-
GCF_013394265.1	feces	Acinetobacter baumannii 31FS3-2 isolated from the feces of duck	duck	-	-	missing	-	-	-	-	-	-	-	-	-	-	-	-	-	-	-	-	-	-
GCF_012974585.1	trachea	Pathogen	Duck	-	mixed culture	-	not collected	-	-	not collected	-	-	-	-	-	-	-	-	-	-	-	-	-	-
GCF_030377505.1	respiratory sample	Microbe sample from Acinetobacter baumannii	ferret	not applicable	bacterial sample	-	-	-	-	-	-	-	-	-	-	-	-	-	-	-	-	-	-	-
GCF_030165035.1	blood	Pathogen	Green turtle	-	-	Osteomyelitis	-	-	-	-	-	-	-	-	-	-	-	-	-	-	-	-	-	-
GCF_029582015.1	Nestling, choana	Pathogen	White Stork	-	-	unknown	-	-	-	-	-	-	-	-	-	-	-	-	-	-	-	-	-	-
GCF_028583465.1	Nestling, choana	Pathogen	White Stork	-	-	unknown	-	-	-	-	-	-	-	-	-	-	-	-	-	-	-	-	-	-
GCF_022660835.1	Choanal swab of a migratory bird	Microbe sample from Acinetobacter baumannii AC1	Dendrocygna viduata	-	Single Bacteria Cell	-	-	-	-	-	-	-	-	-	-	-	-	-	-	-	-	-	-	-
GCF_022369355.1	Manis javanica	Pathogen	-	-	-	-	-	-	-	-	-	-	-	-	-	-	-	-	-	-	-	-	-	-
GCF_022369275.1	Manis javanica	Pathogen	-	-	-	-	-	-	-	-	-	-	-	-	-	-	-	-	-	-	-	-	-	-
GCF_002573905.1	egg shells	Microbe sample from Acinetobacter baumannii	goose	-	tissue sample	-	-	-	-	egg shells	-	-	-	-	-	-	-	-	-	-	-	-	-	-
GCF_002573895.1	choana	Microbe sample from Acinetobacter baumannii	white stork	-	tissue sample	-	-	-	-	choana	-	-	-	-	-	-	-	-	-	-	-	-	-	-
GCF_002573875.1	choana	Microbe sample from Acinetobacter baumannii	white stork	-	tissue sample	-	-	-	-	choana	-	-	-	-	-	-	-	-	-	-	-	-	-	-
GCF_002573825.1	-	Microbe sample from Acinetobacter baumannii	white stork	-	environmental sample	-	-	-	-	-	-	-	-	-	-	-	-	-	-	-	-	-	-	-
GCF_002573815.1	-	Microbe sample from Acinetobacter baumannii	white stork	-	environmental sample	-	-	-	-	-	-	-	-	-	-	-	-	-	-	-	-	-	-	-
GCF_002573735.1	rectum	Microbe sample from Acinetobacter baumannii	white stork	-	tissue sample	-	-	-	-	rectum	-	-	-	-	-	-	-	-	-	-	-	-	-	-
GCF_002573725.1	choana	Microbe sample from Acinetobacter baumannii	white stork	-	tissue sample	-	-	-	-	choana	-	-	-	-	-	-	-	-	-	-	-	-	-	-
GCF_001693205.1	-	Microbe sample from Acinetobacter baumannii	white stork nestling	-	tissue sample	-	-	-	-	choana	-	-	-	-	-	-	-	-	-	-	-	-	-	-
GCF_001693195.1	-	Microbe sample from Acinetobacter baumannii	white stork nestling	-	tissue sample	-	-	-	-	choana	-	-	-	-	-	-	-	-	-	-	-	-	-	-
GCF_001693185.1	-	Microbe sample from Acinetobacter baumannii	white stork nestling	-	tissue sample	-	-	-	-	choana	-	-	-	-	-	-	-	-	-	-	-	-	-	-
GCF_001693175.1	-	Microbe sample from Acinetobacter baumannii	white stork nestling	-	tissue sample	-	-	-	-	rectum	-	-	-	-	-	-	-	-	-	-	-	-	-	-
GCF_001693125.1	-	Microbe sample from Acinetobacter baumannii	white stork nestling	-	tissue sample	-	-	-	-	choana	-	-	-	-	-	-	-	-	-	-	-	-	-	-
GCF_001693105.1	-	Microbe sample from Acinetobacter baumannii	white stork nestling	-	tissue sample	-	-	-	-	choana	-	-	-	-	-	-	-	-	-	-	-	-	-	-
GCF_001693095.1	-	Microbe sample from Acinetobacter baumannii	goose	-	tissue sample	-	-	-	-	choana	-	-	-	-	-	-	-	-	-	-	-	-	-	-
GCA_028446515.1	-	Microbe sample from Acinetobacter baumannii	Ciconia ciconia	-	cell culture	-	-	-	-	-	-	-	-	-	-	-	-	-	-	-	-	-	-	-
GCA_028446485.1	-	Microbe sample from Acinetobacter baumannii	Ciconia ciconia	-	cell culture	-	-	-	-	-	-	-	-	-	-	-	-	-	-	-	-	-	-	-
GCA_028446465.1	-	Microbe sample from Acinetobacter baumannii	Ciconia ciconia	-	cell culture	-	-	-	-	-	-	-	-	-	-	-	-	-	-	-	-	-	-	-
GCA_028446445.1	-	Microbe sample from Acinetobacter baumannii	Ciconia ciconia	-	cell culture	-	-	-	-	-	-	-	-	-	-	-	-	-	-	-	-	-	-	-
GCA_028446415.1	-	Microbe sample from Acinetobacter baumannii	Ciconia ciconia	-	cell culture	-	-	-	-	-	-	-	-	-	-	-	-	-	-	-	-	-	-	-
GCA_028446405.1	-	Microbe sample from Acinetobacter baumannii	Ciconia ciconia	-	cell culture	-	-	-	-	-	-	-	-	-	-	-	-	-	-	-	-	-	-	-
GCA_028446385.1	pellet	Microbe sample from Acinetobacter baumannii	Ciconia ciconia	-	cell culture	-	-	-	-	-	-	-	-	-	-	-	-	-	-	-	-	-	-	-
GCA_028446365.1	-	Microbe sample from Acinetobacter baumannii	Ciconia ciconia	-	cell culture	-	-	-	-	-	-	-	-	-	-	-	-	-	-	-	-	-	-	-
GCA_028446335.1	pellet	Microbe sample from Acinetobacter baumannii	Ciconia ciconia	-	cell culture	-	-	-	-	-	-	-	-	-	-	-	-	-	-	-	-	-	-	-
GCA_028446325.1	pellet	Microbe sample from Acinetobacter baumannii	Ciconia ciconia	-	cell culture	-	-	-	-	-	-	-	-	-	-	-	-	-	-	-	-	-	-	-
GCA_028446305.1	pellet	Microbe sample from Acinetobacter baumannii	Ciconia ciconia	-	cell culture	-	-	-	-	-	-	-	-	-	-	-	-	-	-	-	-	-	-	-
GCA_028446275.1	white stork nestling	Microbe sample from Acinetobacter baumannii	Ciconia ciconia	-	cell culture	-	-	-	-	-	-	-	-	-	-	-	-	-	-	-	-	-	-	-
GCA_028446265.1	white stork nestling	Microbe sample from Acinetobacter baumannii	Ciconia ciconia	-	cell culture	-	-	-	-	-	-	-	-	-	-	-	-	-	-	-	-	-	-	-
GCA_028446235.1	-	Microbe sample from Acinetobacter baumannii	Soricidae	-	cell culture	-	-	-	-	-	-	-	-	-	-	-	-	-	-	-	-	-	-	-
GCA_028446225.1	-	Microbe sample from Acinetobacter baumannii	Ciconia ciconia	-	cell culture	-	-	-	-	-	-	-	-	-	-	-	-	-	-	-	-	-	-	-
GCA_028446205.1	-	Microbe sample from Acinetobacter baumannii	Soricidae	-	cell culture	-	-	-	-	-	-	-	-	-	-	-	-	-	-	-	-	-	-	-
GCA_028446185.1	feather	Microbe sample from Acinetobacter baumannii	bird	-	cell culture	-	-	-	-	-	-	-	-	-	-	-	-	-	-	-	-	-	-	-
GCA_028446165.1	-	Microbe sample from Acinetobacter baumannii	Ciconia ciconia	-	cell culture	-	-	-	-	-	-	-	-	-	-	-	-	-	-	-	-	-	-	-
GCA_028446115.1	-	Microbe sample from Acinetobacter baumannii	Ciconia ciconia	-	cell culture	-	-	-	-	-	-	-	-	-	-	-	-	-	-	-	-	-	-	-
GCA_028446105.1	-	Microbe sample from Acinetobacter baumannii	Ciconia ciconia	-	cell culture	-	-	-	-	-	-	-	-	-	-	-	-	-	-	-	-	-	-	-
GCA_028446095.1	-	Microbe sample from Acinetobacter baumannii	Ciconia ciconia	-	cell culture	-	-	-	-	-	-	-	-	-	-	-	-	-	-	-	-	-	-	-
GCA_028446085.1	-	Microbe sample from Acinetobacter baumannii	Ciconia ciconia	-	cell culture	-	-	-	-	-	-	-	-	-	-	-	-	-	-	-	-	-	-	-
GCA_028446065.1	-	Microbe sample from Acinetobacter baumannii	Ciconia ciconia	-	cell culture	-	-	-	-	-	-	-	-	-	-	-	-	-	-	-	-	-	-	-
GCA_028446045.1	-	Microbe sample from Acinetobacter baumannii	Ciconia ciconia	-	cell culture	-	-	-	-	-	-	-	-	-	-	-	-	-	-	-	-	-	-	-
GCA_028446025.1	-	Microbe sample from Acinetobacter baumannii	Ciconia ciconia	-	cell culture	-	-	-	-	-	-	-	-	-	-	-	-	-	-	-	-	-	-	-
GCA_028445995.1	-	Microbe sample from Acinetobacter baumannii	Ciconia ciconia	-	cell culture	-	-	-	-	-	-	-	-	-	-	-	-	-	-	-	-	-	-	-
GCA_028445975.1	-	Microbe sample from Acinetobacter baumannii	Ciconia ciconia	-	cell culture	-	-	-	-	-	-	-	-	-	-	-	-	-	-	-	-	-	-	-
GCA_028445965.1	-	Microbe sample from Acinetobacter baumannii	Ciconia ciconia	-	cell culture	-	-	-	-	-	-	-	-	-	-	-	-	-	-	-	-	-	-	-
GCA_028445945.1	-	Microbe sample from Acinetobacter baumannii	Ciconia ciconia	-	cell culture	-	-	-	-	-	-	-	-	-	-	-	-	-	-	-	-	-	-	-
GCA_028445915.1	-	Microbe sample from Acinetobacter baumannii	Ciconia ciconia	-	cell culture	-	-	-	-	-	-	-	-	-	-	-	-	-	-	-	-	-	-	-
GCA_028445905.1	-	Microbe sample from Acinetobacter baumannii	Ciconia ciconia	-	cell culture	-	-	-	-	-	-	-	-	-	-	-	-	-	-	-	-	-	-	-
GCA_028445875.1	-	Microbe sample from Acinetobacter baumannii	Ciconia ciconia	-	cell culture	-	-	-	-	-	-	-	-	-	-	-	-	-	-	-	-	-	-	-
GCA_028445865.1	-	Microbe sample from Acinetobacter baumannii	Ciconia ciconia	-	cell culture	-	-	-	-	-	-	-	-	-	-	-	-	-	-	-	-	-	-	-
GCA_028445835.1	-	Microbe sample from Acinetobacter baumannii	Ciconia ciconia	-	cell culture	-	-	-	-	-	-	-	-	-	-	-	-	-	-	-	-	-	-	-
GCA_028445795.1	-	Microbe sample from Acinetobacter baumannii	Ciconia ciconia	-	cell culture	-	-	-	-	-	-	-	-	-	-	-	-	-	-	-	-	-	-	-
GCA_028445785.1	-	Microbe sample from Acinetobacter baumannii	Ciconia ciconia	-	cell culture	-	-	-	-	-	-	-	-	-	-	-	-	-	-	-	-	-	-	-
GCA_028445775.1	-	Microbe sample from Acinetobacter baumannii	Ciconia ciconia	-	cell culture	-	-	-	-	-	-	-	-	-	-	-	-	-	-	-	-	-	-	-
GCA_028445765.1	-	Microbe sample from Acinetobacter baumannii	Ciconia ciconia	-	cell culture	-	-	-	-	-	-	-	-	-	-	-	-	-	-	-	-	-	-	-
GCA_028445735.1	-	Microbe sample from Acinetobacter baumannii	Ciconia ciconia	-	cell culture	-	-	-	-	-	-	-	-	-	-	-	-	-	-	-	-	-	-	-
GCA_028445725.1	-	Microbe sample from Acinetobacter baumannii	Ciconia ciconia	-	cell culture	-	-	-	-	-	-	-	-	-	-	-	-	-	-	-	-	-	-	-
GCA_028445705.1	-	Microbe sample from Acinetobacter baumannii	Ciconia ciconia	-	cell culture	-	-	-	-	-	-	-	-	-	-	-	-	-	-	-	-	-	-	-
GCA_028445675.1	-	Microbe sample from Acinetobacter baumannii	Ciconia ciconia	-	cell culture	-	-	-	-	-	-	-	-	-	-	-	-	-	-	-	-	-	-	-
GCA_028445665.1	-	Microbe sample from Acinetobacter baumannii	Ciconia ciconia	-	cell culture	-	-	-	-	-	-	-	-	-	-	-	-	-	-	-	-	-	-	-
GCA_028445645.1	-	Microbe sample from Acinetobacter baumannii	Ciconia ciconia	-	cell culture	-	-	-	-	-	-	-	-	-	-	-	-	-	-	-	-	-	-	-
GCA_028445585.1	-	Microbe sample from Acinetobacter baumannii	Ciconia ciconia	-	cell culture	-	-	-	-	-	-	-	-	-	-	-	-	-	-	-	-	-	-	-
GCA_028445575.1	-	Microbe sample from Acinetobacter baumannii	Ciconia ciconia	-	cell culture	-	-	-	-	-	-	-	-	-	-	-	-	-	-	-	-	-	-	-
GCA_028445545.1	-	Microbe sample from Acinetobacter baumannii	Ciconia ciconia	-	cell culture	-	-	-	-	-	-	-	-	-	-	-	-	-	-	-	-	-	-	-
GCA_028445525.1	-	Microbe sample from Acinetobacter baumannii	Anas platyrhynchos	-	cell culture	-	-	-	-	-	-	-	-	-	-	-	-	-	-	-	-	-	-	-
GCA_028445505.1	-	Microbe sample from Acinetobacter baumannii	Ciconia ciconia	-	cell culture	-	-	-	-	-	-	-	-	-	-	-	-	-	-	-	-	-	-	-
GCA_028445485.1	pellet	Microbe sample from Acinetobacter baumannii	Ciconia ciconia	-	cell culture	-	-	-	-	-	-	-	-	-	-	-	-	-	-	-	-	-	-	-
GCA_028445455.1	-	Microbe sample from Acinetobacter baumannii	Ciconia ciconia	-	cell culture	-	-	-	-	-	-	-	-	-	-	-	-	-	-	-	-	-	-	-
GCA_028445445.1	-	Microbe sample from Acinetobacter baumannii	Ciconia ciconia	-	cell culture	-	-	-	-	-	-	-	-	-	-	-	-	-	-	-	-	-	-	-
GCA_028445425.1	-	Microbe sample from Acinetobacter baumannii	Ciconia ciconia	-	cell culture	-	-	-	-	-	-	-	-	-	-	-	-	-	-	-	-	-	-	-
GCA_028445395.1	-	Microbe sample from Acinetobacter baumannii	Ciconia ciconia	-	cell culture	-	-	-	-	-	-	-	-	-	-	-	-	-	-	-	-	-	-	-
GCA_028445385.1	-	Microbe sample from Acinetobacter baumannii	Ciconia ciconia	-	cell culture	-	-	-	-	-	-	-	-	-	-	-	-	-	-	-	-	-	-	-
GCA_028445355.1	-	Microbe sample from Acinetobacter baumannii	Ciconia ciconia	-	cell culture	-	-	-	-	-	-	-	-	-	-	-	-	-	-	-	-	-	-	-
GCA_028445345.1	-	Microbe sample from Acinetobacter baumannii	Ciconia ciconia	-	cell culture	-	-	-	-	-	-	-	-	-	-	-	-	-	-	-	-	-	-	-
GCA_028445325.1	-	Microbe sample from Acinetobacter baumannii	Ciconia ciconia	-	cell culture	-	-	-	-	-	-	-	-	-	-	-	-	-	-	-	-	-	-	-
GCA_028445295.1	-	Microbe sample from Acinetobacter baumannii	Ciconia ciconia	-	cell culture	-	-	-	-	-	-	-	-	-	-	-	-	-	-	-	-	-	-	-
GCA_028445285.1	-	Microbe sample from Acinetobacter baumannii	Ciconia ciconia	-	cell culture	-	-	-	-	-	-	-	-	-	-	-	-	-	-	-	-	-	-	-
GCA_028445265.1	-	Microbe sample from Acinetobacter baumannii	Ciconia ciconia	-	cell culture	-	-	-	-	-	-	-	-	-	-	-	-	-	-	-	-	-	-	-
GCA_028445235.1	-	Microbe sample from Acinetobacter baumannii	Ciconia ciconia	-	cell culture	-	-	-	-	-	-	-	-	-	-	-	-	-	-	-	-	-	-	-
GCA_028445225.1	-	Microbe sample from Acinetobacter baumannii	Ciconia ciconia	-	cell culture	-	-	-	-	-	-	-	-	-	-	-	-	-	-	-	-	-	-	-
GCA_028445205.1	-	Microbe sample from Acinetobacter baumannii	Ciconia ciconia	-	cell culture	-	-	-	-	-	-	-	-	-	-	-	-	-	-	-	-	-	-	-
GCA_028445185.1	-	Microbe sample from Acinetobacter baumannii	Ciconia ciconia	-	cell culture	-	-	-	-	-	-	-	-	-	-	-	-	-	-	-	-	-	-	-
GCA_028445165.1	-	Microbe sample from Acinetobacter baumannii	Ciconia ciconia	-	cell culture	-	-	-	-	-	-	-	-	-	-	-	-	-	-	-	-	-	-	-
GCA_028445135.1	-	Microbe sample from Acinetobacter baumannii	Ciconia ciconia	-	cell culture	-	-	-	-	-	-	-	-	-	-	-	-	-	-	-	-	-	-	-
GCA_028445125.1	pellet	Microbe sample from Acinetobacter baumannii	Ciconia ciconia	-	cell culture	-	-	-	-	-	-	-	-	-	-	-	-	-	-	-	-	-	-	-
GCA_028445105.1	-	Microbe sample from Acinetobacter baumannii	Ciconia ciconia	-	cell culture	-	-	-	-	-	-	-	-	-	-	-	-	-	-	-	-	-	-	-
GCA_028445075.1	pellet	Microbe sample from Acinetobacter baumannii	Ciconia ciconia	-	cell culture	-	-	-	-	-	-	-	-	-	-	-	-	-	-	-	-	-	-	-
GCA_028445065.1	-	Microbe sample from Acinetobacter baumannii	Ciconia ciconia	-	cell culture	-	-	-	-	-	-	-	-	-	-	-	-	-	-	-	-	-	-	-
GCA_028445035.1	-	Microbe sample from Acinetobacter baumannii	Mus musculus	-	cell culture	-	-	-	-	-	-	-	-	-	-	-	-	-	-	-	-	-	-	-
GCA_028444985.1	-	Microbe sample from Acinetobacter baumannii	Ciconia ciconia	-	cell culture	-	-	-	-	-	-	-	-	-	-	-	-	-	-	-	-	-	-	-
GCA_028444975.1	pellet	Microbe sample from Acinetobacter baumannii	Ciconia ciconia	-	cell culture	-	-	-	-	-	-	-	-	-	-	-	-	-	-	-	-	-	-	-
GCA_028444935.1	-	Microbe sample from Acinetobacter baumannii	Ciconia ciconia	-	cell culture	-	-	-	-	-	-	-	-	-	-	-	-	-	-	-	-	-	-	-
GCA_028444925.1	-	Microbe sample from Acinetobacter baumannii	Ciconia ciconia	-	cell culture	-	-	-	-	-	-	-	-	-	-	-	-	-	-	-	-	-	-	-
GCA_028444885.1	-	Microbe sample from Acinetobacter baumannii	Ciconia ciconia	-	cell culture	-	-	-	-	-	-	-	-	-	-	-	-	-	-	-	-	-	-	-
GCA_028444875.1	pellet	Microbe sample from Acinetobacter baumannii	Asio otus	-	cell culture	-	-	-	-	-	-	-	-	-	-	-	-	-	-	-	-	-	-	-
GCA_028444865.1	pellet	Microbe sample from Acinetobacter baumannii	Falco tinnunculus	-	cell culture	-	-	-	-	-	-	-	-	-	-	-	-	-	-	-	-	-	-	-
GCA_028444845.1	-	Microbe sample from Acinetobacter baumannii	Ciconia ciconia	-	cell culture	-	-	-	-	-	-	-	-	-	-	-	-	-	-	-	-	-	-	-
GCA_028444825.1	-	Microbe sample from Acinetobacter baumannii	Ciconia ciconia	-	cell culture	-	-	-	-	-	-	-	-	-	-	-	-	-	-	-	-	-	-	-
GCA_028444805.1	-	Microbe sample from Acinetobacter baumannii	Ciconia ciconia	-	cell culture	-	-	-	-	-	-	-	-	-	-	-	-	-	-	-	-	-	-	-
GCA_028444785.1	-	Microbe sample from Acinetobacter baumannii	Ciconia ciconia	-	cell culture	-	-	-	-	-	-	-	-	-	-	-	-	-	-	-	-	-	-	-
GCA_028444765.1	-	Microbe sample from Acinetobacter baumannii	Ciconia ciconia	-	cell culture	-	-	-	-	-	-	-	-	-	-	-	-	-	-	-	-	-	-	-
GCA_028444745.1	-	Microbe sample from Acinetobacter baumannii	Ciconia ciconia	-	cell culture	-	-	-	-	-	-	-	-	-	-	-	-	-	-	-	-	-	-	-
GCA_028444715.1	-	Microbe sample from Acinetobacter baumannii	Ciconia ciconia	-	cell culture	-	-	-	-	-	-	-	-	-	-	-	-	-	-	-	-	-	-	-
GCA_028444705.1	-	Microbe sample from Acinetobacter baumannii	Ciconia ciconia	-	cell culture	-	-	-	-	-	-	-	-	-	-	-	-	-	-	-	-	-	-	-
GCA_028444685.1	-	Microbe sample from Acinetobacter baumannii	Ciconia ciconia	-	cell culture	-	-	-	-	-	-	-	-	-	-	-	-	-	-	-	-	-	-	-
GCA_028444665.1	-	Microbe sample from Acinetobacter baumannii	Ciconia ciconia	-	cell culture	-	-	-	-	-	-	-	-	-	-	-	-	-	-	-	-	-	-	-
GCA_028444645.1	-	Microbe sample from Acinetobacter baumannii	Ciconia ciconia	-	cell culture	-	-	-	-	-	-	-	-	-	-	-	-	-	-	-	-	-	-	-
GCA_028444625.1	-	Microbe sample from Acinetobacter baumannii	Ciconia ciconia	-	cell culture	-	-	-	-	-	-	-	-	-	-	-	-	-	-	-	-	-	-	-
GCA_028444605.1	-	Microbe sample from Acinetobacter baumannii	Ciconia ciconia	-	cell culture	-	-	-	-	-	-	-	-	-	-	-	-	-	-	-	-	-	-	-
GCA_028444585.1	-	Microbe sample from Acinetobacter baumannii	Ciconia ciconia	-	cell culture	-	-	-	-	-	-	-	-	-	-	-	-	-	-	-	-	-	-	-
GCA_028444555.1	-	Microbe sample from Acinetobacter baumannii	Ciconia ciconia	-	cell culture	-	-	-	-	-	-	-	-	-	-	-	-	-	-	-	-	-	-	-
GCA_028444545.1	-	Microbe sample from Acinetobacter baumannii	Ciconia ciconia	-	cell culture	-	-	-	-	-	-	-	-	-	-	-	-	-	-	-	-	-	-	-
GCA_028444525.1	-	Microbe sample from Acinetobacter baumannii	Ciconia ciconia	-	cell culture	-	-	-	-	-	-	-	-	-	-	-	-	-	-	-	-	-	-	-
GCA_028444485.1	-	Microbe sample from Acinetobacter baumannii	Ciconia ciconia	-	cell culture	-	-	-	-	-	-	-	-	-	-	-	-	-	-	-	-	-	-	-
GCA_028444465.1	-	Microbe sample from Acinetobacter baumannii	Ciconia ciconia	-	cell culture	-	-	-	-	-	-	-	-	-	-	-	-	-	-	-	-	-	-	-
GCA_028444445.1	-	Microbe sample from Acinetobacter baumannii	Ciconia ciconia	-	cell culture	-	-	-	-	-	-	-	-	-	-	-	-	-	-	-	-	-	-	-
GCA_028444425.1	-	Microbe sample from Acinetobacter baumannii	Ciconia ciconia	-	cell culture	-	-	-	-	-	-	-	-	-	-	-	-	-	-	-	-	-	-	-
GCA_028444395.1	-	Microbe sample from Acinetobacter baumannii	Ciconia ciconia	-	cell culture	-	-	-	-	-	-	-	-	-	-	-	-	-	-	-	-	-	-	-
GCA_028444375.1	-	Microbe sample from Acinetobacter baumannii	Ciconia ciconia	-	cell culture	-	-	-	-	-	-	-	-	-	-	-	-	-	-	-	-	-	-	-
GCA_028444365.1	-	Microbe sample from Acinetobacter baumannii	Ciconia ciconia	-	cell culture	-	-	-	-	-	-	-	-	-	-	-	-	-	-	-	-	-	-	-
GCA_028444345.1	-	Microbe sample from Acinetobacter baumannii	Ciconia ciconia	-	cell culture	-	-	-	-	-	-	-	-	-	-	-	-	-	-	-	-	-	-	-
GCA_028444325.1	-	Microbe sample from Acinetobacter baumannii	Ciconia ciconia	-	cell culture	-	-	-	-	-	-	-	-	-	-	-	-	-	-	-	-	-	-	-
GCA_028444265.1	-	Microbe sample from Acinetobacter baumannii	Ciconia ciconia	-	cell culture	-	-	-	-	-	-	-	-	-	-	-	-	-	-	-	-	-	-	-
GCA_028444255.1	pellet	Microbe sample from Acinetobacter baumannii	Ciconia ciconia	-	cell culture	-	-	-	-	-	-	-	-	-	-	-	-	-	-	-	-	-	-	-
GCA_028444245.1	-	Microbe sample from Acinetobacter baumannii	Ciconia ciconia	-	cell culture	-	-	-	-	-	-	-	-	-	-	-	-	-	-	-	-	-	-	-
GCA_028444235.1	-	Microbe sample from Acinetobacter baumannii	Ciconia ciconia	-	cell culture	-	-	-	-	-	-	-	-	-	-	-	-	-	-	-	-	-	-	-
GCA_028444225.1	-	Microbe sample from Acinetobacter baumannii	Ciconia ciconia	-	cell culture	-	-	-	-	-	-	-	-	-	-	-	-	-	-	-	-	-	-	-
GCA_028444185.1	-	Microbe sample from Acinetobacter baumannii	Ciconia ciconia	-	cell culture	-	-	-	-	-	-	-	-	-	-	-	-	-	-	-	-	-	-	-
GCA_028444175.1	-	Microbe sample from Acinetobacter baumannii	Ciconia ciconia	-	cell culture	-	-	-	-	-	-	-	-	-	-	-	-	-	-	-	-	-	-	-
GCA_028444165.1	-	Microbe sample from Acinetobacter baumannii	Ciconia ciconia	-	cell culture	-	-	-	-	-	-	-	-	-	-	-	-	-	-	-	-	-	-	-
GCA_028444145.1	egg shell	Microbe sample from Acinetobacter baumannii	Ardea cinerea	-	cell culture	-	-	-	-	-	-	-	-	-	-	-	-	-	-	-	-	-	-	-
GCA_028444105.1	-	Microbe sample from Acinetobacter baumannii	Ciconia ciconia	-	cell culture	-	-	-	-	-	-	-	-	-	-	-	-	-	-	-	-	-	-	-
GCA_028444085.1	-	Microbe sample from Acinetobacter baumannii	Lumbricina	-	cell culture	-	-	-	-	-	-	-	-	-	-	-	-	-	-	-	-	-	-	-
GCA_028444075.1	-	Microbe sample from Acinetobacter baumannii	Ciconia ciconia	-	cell culture	-	-	-	-	-	-	-	-	-	-	-	-	-	-	-	-	-	-	-
GCA_028444065.1	-	Microbe sample from Acinetobacter baumannii	Soricidae	-	cell culture	-	-	-	-	-	-	-	-	-	-	-	-	-	-	-	-	-	-	-
GCA_028444025.1	pellet	Microbe sample from Acinetobacter baumannii	Ciconia ciconia	-	cell culture	-	-	-	-	-	-	-	-	-	-	-	-	-	-	-	-	-	-	-
GCA_028444015.1	-	Microbe sample from Acinetobacter baumannii	Ciconia ciconia	-	cell culture	-	-	-	-	-	-	-	-	-	-	-	-	-	-	-	-	-	-	-
GCA_028443985.1	-	Microbe sample from Acinetobacter baumannii	Ciconia ciconia	-	cell culture	-	-	-	-	-	-	-	-	-	-	-	-	-	-	-	-	-	-	-
GCA_028443975.1	-	Microbe sample from Acinetobacter baumannii	Ciconia ciconia	-	cell culture	-	-	-	-	-	-	-	-	-	-	-	-	-	-	-	-	-	-	-
GCA_028443965.1	-	Microbe sample from Acinetobacter baumannii	Ciconia ciconia	-	cell culture	-	-	-	-	-	-	-	-	-	-	-	-	-	-	-	-	-	-	-
GCA_028443925.1	-	Microbe sample from Acinetobacter baumannii	Ciconia ciconia	-	cell culture	-	-	-	-	-	-	-	-	-	-	-	-	-	-	-	-	-	-	-
GCA_028443905.1	-	Microbe sample from Acinetobacter baumannii	Ciconia ciconia	-	cell culture	-	-	-	-	-	-	-	-	-	-	-	-	-	-	-	-	-	-	-
GCA_028443885.1	-	Microbe sample from Acinetobacter baumannii	Ciconia ciconia	-	cell culture	-	-	-	-	-	-	-	-	-	-	-	-	-	-	-	-	-	-	-
GCA_028443875.1	-	Microbe sample from Acinetobacter baumannii	Ciconia ciconia	-	cell culture	-	-	-	-	-	-	-	-	-	-	-	-	-	-	-	-	-	-	-
GCA_028443865.1	-	Microbe sample from Acinetobacter baumannii	Ciconia ciconia	-	cell culture	-	-	-	-	-	-	-	-	-	-	-	-	-	-	-	-	-	-	-
GCA_028443835.1	-	Microbe sample from Acinetobacter baumannii	Ciconia ciconia	-	cell culture	-	-	-	-	-	-	-	-	-	-	-	-	-	-	-	-	-	-	-
GCA_028443825.1	-	Microbe sample from Acinetobacter baumannii	Ciconia ciconia	-	cell culture	-	-	-	-	-	-	-	-	-	-	-	-	-	-	-	-	-	-	-
GCA_028443805.1	-	Microbe sample from Acinetobacter baumannii	Ciconia ciconia	-	cell culture	-	-	-	-	-	-	-	-	-	-	-	-	-	-	-	-	-	-	-
GCA_028443775.1	-	Microbe sample from Acinetobacter baumannii	Ciconia ciconia	-	cell culture	-	-	-	-	-	-	-	-	-	-	-	-	-	-	-	-	-	-	-
GCA_028443765.1	-	Microbe sample from Acinetobacter baumannii	Ciconia ciconia	-	cell culture	-	-	-	-	-	-	-	-	-	-	-	-	-	-	-	-	-	-	-
GCA_028443735.1	-	Microbe sample from Acinetobacter baumannii	Ciconia ciconia	-	cell culture	-	-	-	-	-	-	-	-	-	-	-	-	-	-	-	-	-	-	-
GCA_028443705.1	-	Microbe sample from Acinetobacter baumannii	Ciconia ciconia	-	cell culture	-	-	-	-	-	-	-	-	-	-	-	-	-	-	-	-	-	-	-
GCA_028443685.1	-	Microbe sample from Acinetobacter baumannii	Ciconia ciconia	-	cell culture	-	-	-	-	-	-	-	-	-	-	-	-	-	-	-	-	-	-	-
GCA_028443655.1	-	Microbe sample from Acinetobacter baumannii	Ciconia ciconia	-	cell culture	-	-	-	-	-	-	-	-	-	-	-	-	-	-	-	-	-	-	-
GCA_028443645.1	-	Microbe sample from Acinetobacter baumannii	Ciconia ciconia	-	cell culture	-	-	-	-	-	-	-	-	-	-	-	-	-	-	-	-	-	-	-
GCA_028443625.1	-	Microbe sample from Acinetobacter baumannii	Ciconia ciconia	-	cell culture	-	-	-	-	-	-	-	-	-	-	-	-	-	-	-	-	-	-	-
GCA_028443605.1	-	Microbe sample from Acinetobacter baumannii	Ciconia ciconia	-	cell culture	-	-	-	-	-	-	-	-	-	-	-	-	-	-	-	-	-	-	-
GCA_028443555.1	-	Microbe sample from Acinetobacter baumannii	Ciconia ciconia	-	cell culture	-	-	-	-	-	-	-	-	-	-	-	-	-	-	-	-	-	-	-
GCA_028443545.1	-	Microbe sample from Acinetobacter baumannii	Lumbricina	-	cell culture	-	-	-	-	-	-	-	-	-	-	-	-	-	-	-	-	-	-	-
GCA_028443345.1	-	Microbe sample from Acinetobacter baumannii	Ciconia ciconia	-	cell culture	-	-	-	-	-	-	-	-	-	-	-	-	-	-	-	-	-	-	-
GCA_028443305.1	-	Microbe sample from Acinetobacter baumannii	Lumbricina	-	cell culture	-	-	-	-	-	-	-	-	-	-	-	-	-	-	-	-	-	-	-
GCA_028443275.1	pellet	Microbe sample from Acinetobacter baumannii	Ciconia ciconia	-	cell culture	-	-	-	-	-	-	-	-	-	-	-	-	-	-	-	-	-	-	-
GCA_028443265.1	-	Microbe sample from Acinetobacter baumannii	Ciconia ciconia	-	cell culture	-	-	-	-	-	-	-	-	-	-	-	-	-	-	-	-	-	-	-
GCA_028443225.1	-	Microbe sample from Acinetobacter baumannii	Ciconia ciconia	-	cell culture	-	-	-	-	-	-	-	-	-	-	-	-	-	-	-	-	-	-	-
GCA_028443215.1	-	Microbe sample from Acinetobacter baumannii	Ciconia ciconia	-	cell culture	-	-	-	-	-	-	-	-	-	-	-	-	-	-	-	-	-	-	-
GCA_028443205.1	-	Microbe sample from Acinetobacter baumannii	Ciconia ciconia	-	cell culture	-	-	-	-	-	-	-	-	-	-	-	-	-	-	-	-	-	-	-
GCA_028443185.1	-	Microbe sample from Acinetobacter baumannii	Ciconia ciconia	-	cell culture	-	-	-	-	-	-	-	-	-	-	-	-	-	-	-	-	-	-	-
GCA_028443165.1	-	Microbe sample from Acinetobacter baumannii	Ciconia ciconia	-	cell culture	-	-	-	-	-	-	-	-	-	-	-	-	-	-	-	-	-	-	-
GCA_028443145.1	-	Microbe sample from Acinetobacter baumannii	Ciconia ciconia	-	cell culture	-	-	-	-	-	-	-	-	-	-	-	-	-	-	-	-	-	-	-
GCA_028443125.1	-	Microbe sample from Acinetobacter baumannii	Ciconia ciconia	-	cell culture	-	-	-	-	-	-	-	-	-	-	-	-	-	-	-	-	-	-	-
GCA_028443105.1	-	Microbe sample from Acinetobacter baumannii	Ciconia ciconia	-	cell culture	-	-	-	-	-	-	-	-	-	-	-	-	-	-	-	-	-	-	-
GCA_028443085.1	-	Microbe sample from Acinetobacter baumannii	Ciconia ciconia	-	cell culture	-	-	-	-	-	-	-	-	-	-	-	-	-	-	-	-	-	-	-
GCA_028443065.1	-	Microbe sample from Acinetobacter baumannii	Ciconia ciconia	-	cell culture	-	-	-	-	-	-	-	-	-	-	-	-	-	-	-	-	-	-	-
GCA_028443035.1	-	Microbe sample from Acinetobacter baumannii	Ciconia ciconia	-	cell culture	-	-	-	-	-	-	-	-	-	-	-	-	-	-	-	-	-	-	-
GCA_028443025.1	-	Microbe sample from Acinetobacter baumannii	Lumbricina	-	cell culture	-	-	-	-	-	-	-	-	-	-	-	-	-	-	-	-	-	-	-
GCA_028442995.1	-	Microbe sample from Acinetobacter baumannii	Lumbricina	-	cell culture	-	-	-	-	-	-	-	-	-	-	-	-	-	-	-	-	-	-	-
GCA_028442965.1	-	Microbe sample from Acinetobacter baumannii	Lumbricina	-	cell culture	-	-	-	-	-	-	-	-	-	-	-	-	-	-	-	-	-	-	-
GCA_028442945.1	-	Microbe sample from Acinetobacter baumannii	Lumbricina	-	cell culture	-	-	-	-	-	-	-	-	-	-	-	-	-	-	-	-	-	-	-
GCA_028442925.1	-	Microbe sample from Acinetobacter baumannii	Lumbricina	-	cell culture	-	-	-	-	-	-	-	-	-	-	-	-	-	-	-	-	-	-	-
GCA_028442585.1	-	Microbe sample from Acinetobacter baumannii	Lumbricina	-	cell culture	-	-	-	-	-	-	-	-	-	-	-	-	-	-	-	-	-	-	-
GCA_028442565.1	-	Microbe sample from Acinetobacter baumannii	Lumbricina	-	cell culture	-	-	-	-	-	-	-	-	-	-	-	-	-	-	-	-	-	-	-
GCA_028442535.1	-	Microbe sample from Acinetobacter baumannii	Lumbricina	-	cell culture	-	-	-	-	-	-	-	-	-	-	-	-	-	-	-	-	-	-	-
GCA_028442525.1	-	Microbe sample from Acinetobacter baumannii	Lumbricina	-	cell culture	-	-	-	-	-	-	-	-	-	-	-	-	-	-	-	-	-	-	-
GCA_028442485.1	-	Microbe sample from Acinetobacter baumannii	Lumbricina	-	cell culture	-	-	-	-	-	-	-	-	-	-	-	-	-	-	-	-	-	-	-
GCA_028442455.1	-	Microbe sample from Acinetobacter baumannii	Lumbricina	-	cell culture	-	-	-	-	-	-	-	-	-	-	-	-	-	-	-	-	-	-	-
GCA_028442405.1	-	Microbe sample from Acinetobacter baumannii	Ciconia ciconia	-	cell culture	-	-	-	-	-	-	-	-	-	-	-	-	-	-	-	-	-	-	-
GCA_028442385.1	-	Microbe sample from Acinetobacter baumannii	Ciconia ciconia	-	cell culture	-	-	-	-	-	-	-	-	-	-	-	-	-	-	-	-	-	-	-
GCA_028442365.1	-	Microbe sample from Acinetobacter baumannii	Ciconia ciconia	-	cell culture	-	-	-	-	-	-	-	-	-	-	-	-	-	-	-	-	-	-	-
GCA_028442335.1	-	Microbe sample from Acinetobacter baumannii	Ciconia ciconia	-	cell culture	-	-	-	-	-	-	-	-	-	-	-	-	-	-	-	-	-	-	-
GCA_028442325.1	-	Microbe sample from Acinetobacter baumannii	Ciconia ciconia	-	cell culture	-	-	-	-	-	-	-	-	-	-	-	-	-	-	-	-	-	-	-
GCA_028442305.1	-	Microbe sample from Acinetobacter baumannii	Ciconia ciconia	-	cell culture	-	-	-	-	-	-	-	-	-	-	-	-	-	-	-	-	-	-	-
GCA_028442285.1	-	Microbe sample from Acinetobacter baumannii	Ciconia ciconia	-	cell culture	-	-	-	-	-	-	-	-	-	-	-	-	-	-	-	-	-	-	-
GCA_028442265.1	-	Microbe sample from Acinetobacter baumannii	Ciconia ciconia	-	cell culture	-	-	-	-	-	-	-	-	-	-	-	-	-	-	-	-	-	-	-
GCA_028442245.1	-	Microbe sample from Acinetobacter baumannii	Ciconia ciconia	-	cell culture	-	-	-	-	-	-	-	-	-	-	-	-	-	-	-	-	-	-	-
GCA_028442215.1	-	Microbe sample from Acinetobacter baumannii	Ciconia ciconia	-	cell culture	-	-	-	-	-	-	-	-	-	-	-	-	-	-	-	-	-	-	-
GCA_028442205.1	-	Microbe sample from Acinetobacter baumannii	Ciconia ciconia	-	cell culture	-	-	-	-	-	-	-	-	-	-	-	-	-	-	-	-	-	-	-
GCA_028442185.1	-	Microbe sample from Acinetobacter baumannii	Ciconia ciconia	-	cell culture	-	-	-	-	-	-	-	-	-	-	-	-	-	-	-	-	-	-	-
GCA_028442165.1	-	Microbe sample from Acinetobacter baumannii	Ciconia ciconia	-	cell culture	-	-	-	-	-	-	-	-	-	-	-	-	-	-	-	-	-	-	-
GCA_028442145.1	-	Microbe sample from Acinetobacter baumannii	Ciconia ciconia	-	cell culture	-	-	-	-	-	-	-	-	-	-	-	-	-	-	-	-	-	-	-
GCA_028442125.1	-	Microbe sample from Acinetobacter baumannii	Ciconia ciconia	-	cell culture	-	-	-	-	-	-	-	-	-	-	-	-	-	-	-	-	-	-	-
GCA_028442105.1	-	Microbe sample from Acinetobacter baumannii	Ciconia ciconia	-	cell culture	-	-	-	-	-	-	-	-	-	-	-	-	-	-	-	-	-	-	-
GCA_028442075.1	-	Microbe sample from Acinetobacter baumannii	Ciconia ciconia	-	cell culture	-	-	-	-	-	-	-	-	-	-	-	-	-	-	-	-	-	-	-
GCA_028442065.1	-	Microbe sample from Acinetobacter baumannii	Ciconia ciconia	-	cell culture	-	-	-	-	-	-	-	-	-	-	-	-	-	-	-	-	-	-	-
GCA_028442035.1	-	Microbe sample from Acinetobacter baumannii	Ciconia ciconia	-	cell culture	-	-	-	-	-	-	-	-	-	-	-	-	-	-	-	-	-	-	-
GCA_028442025.1	-	Microbe sample from Acinetobacter baumannii	Ciconia ciconia	-	cell culture	-	-	-	-	-	-	-	-	-	-	-	-	-	-	-	-	-	-	-
GCA_028442005.1	-	Microbe sample from Acinetobacter baumannii	Ciconia ciconia	-	cell culture	-	-	-	-	-	-	-	-	-	-	-	-	-	-	-	-	-	-	-
GCA_028441965.1	-	Microbe sample from Acinetobacter baumannii	Ciconia ciconia	-	cell culture	-	-	-	-	-	-	-	-	-	-	-	-	-	-	-	-	-	-	-
GCA_028441945.1	-	Microbe sample from Acinetobacter baumannii	Ciconia ciconia	-	cell culture	-	-	-	-	-	-	-	-	-	-	-	-	-	-	-	-	-	-	-
GCA_028441925.1	-	Microbe sample from Acinetobacter baumannii	Ciconia ciconia	-	cell culture	-	-	-	-	-	-	-	-	-	-	-	-	-	-	-	-	-	-	-
GCA_028441905.1	-	Microbe sample from Acinetobacter baumannii	Ciconia ciconia	-	cell culture	-	-	-	-	-	-	-	-	-	-	-	-	-	-	-	-	-	-	-
GCA_028441875.1	-	Microbe sample from Acinetobacter baumannii	Ciconia ciconia	-	cell culture	-	-	-	-	-	-	-	-	-	-	-	-	-	-	-	-	-	-	-
GCA_028441865.1	-	Microbe sample from Acinetobacter baumannii	Ciconia ciconia	-	cell culture	-	-	-	-	-	-	-	-	-	-	-	-	-	-	-	-	-	-	-
GCA_028441845.1	-	Microbe sample from Acinetobacter baumannii	Ciconia ciconia	-	cell culture	-	-	-	-	-	-	-	-	-	-	-	-	-	-	-	-	-	-	-
GCA_028441825.1	pellet	Microbe sample from Acinetobacter baumannii	Ciconia ciconia	-	cell culture	-	-	-	-	-	-	-	-	-	-	-	-	-	-	-	-	-	-	-
GCA_028441795.1	-	Microbe sample from Acinetobacter baumannii	Ciconia ciconia	-	cell culture	-	-	-	-	-	-	-	-	-	-	-	-	-	-	-	-	-	-	-
GCA_028441775.1	-	Microbe sample from Acinetobacter baumannii	Ciconia ciconia	-	cell culture	-	-	-	-	-	-	-	-	-	-	-	-	-	-	-	-	-	-	-
GCA_028441765.1	-	Microbe sample from Acinetobacter baumannii	Ciconia ciconia	-	cell culture	-	-	-	-	-	-	-	-	-	-	-	-	-	-	-	-	-	-	-
GCA_028441745.1	-	Microbe sample from Acinetobacter baumannii	Ciconia ciconia	-	cell culture	-	-	-	-	-	-	-	-	-	-	-	-	-	-	-	-	-	-	-
GCA_028441725.1	-	Microbe sample from Acinetobacter baumannii	Ciconia ciconia	-	cell culture	-	-	-	-	-	-	-	-	-	-	-	-	-	-	-	-	-	-	-
GCA_028441705.1	-	Microbe sample from Acinetobacter baumannii	Ciconia ciconia	-	cell culture	-	-	-	-	-	-	-	-	-	-	-	-	-	-	-	-	-	-	-
GCA_028441665.1	-	Microbe sample from Acinetobacter baumannii	Ciconia ciconia	-	cell culture	-	-	-	-	-	-	-	-	-	-	-	-	-	-	-	-	-	-	-
GCA_028441655.1	-	Microbe sample from Acinetobacter baumannii	Ciconia ciconia	-	cell culture	-	-	-	-	-	-	-	-	-	-	-	-	-	-	-	-	-	-	-
GCA_028441635.1	-	Microbe sample from Acinetobacter baumannii	Ciconia ciconia	-	cell culture	-	-	-	-	-	-	-	-	-	-	-	-	-	-	-	-	-	-	-
GCA_028441625.1	-	Microbe sample from Acinetobacter baumannii	Ciconia ciconia	-	cell culture	-	-	-	-	-	-	-	-	-	-	-	-	-	-	-	-	-	-	-
GCA_028441585.1	-	Microbe sample from Acinetobacter baumannii	Ciconia ciconia	-	cell culture	-	-	-	-	-	-	-	-	-	-	-	-	-	-	-	-	-	-	-
GCA_028441565.1	-	Microbe sample from Acinetobacter baumannii	Ciconia ciconia	-	cell culture	-	-	-	-	-	-	-	-	-	-	-	-	-	-	-	-	-	-	-
GCA_028441555.1	-	Microbe sample from Acinetobacter baumannii	Ciconia ciconia	-	cell culture	-	-	-	-	-	-	-	-	-	-	-	-	-	-	-	-	-	-	-
GCA_028441545.1	-	Microbe sample from Acinetobacter baumannii	Ciconia ciconia	-	cell culture	-	-	-	-	-	-	-	-	-	-	-	-	-	-	-	-	-	-	-
GCA_028441525.1	-	Microbe sample from Acinetobacter baumannii	Ciconia ciconia	-	cell culture	-	-	-	-	-	-	-	-	-	-	-	-	-	-	-	-	-	-	-
GCA_028441485.1	-	Microbe sample from Acinetobacter baumannii	Ciconia ciconia	-	cell culture	-	-	-	-	-	-	-	-	-	-	-	-	-	-	-	-	-	-	-
GCA_028441475.1	-	Microbe sample from Acinetobacter baumannii	Ciconia ciconia	-	cell culture	-	-	-	-	-	-	-	-	-	-	-	-	-	-	-	-	-	-	-
GCA_028441465.1	-	Microbe sample from Acinetobacter baumannii	Ciconia ciconia	-	cell culture	-	-	-	-	-	-	-	-	-	-	-	-	-	-	-	-	-	-	-
GCA_028441435.1	-	Microbe sample from Acinetobacter baumannii	Ciconia ciconia	-	cell culture	-	-	-	-	-	-	-	-	-	-	-	-	-	-	-	-	-	-	-
GCA_028441425.1	-	Microbe sample from Acinetobacter baumannii	Ciconia ciconia	-	cell culture	-	-	-	-	-	-	-	-	-	-	-	-	-	-	-	-	-	-	-
GCA_028441405.1	-	Microbe sample from Acinetobacter baumannii	Ciconia ciconia	-	cell culture	-	-	-	-	-	-	-	-	-	-	-	-	-	-	-	-	-	-	-
GCA_028441375.1	-	Microbe sample from Acinetobacter baumannii	Ciconia ciconia	-	cell culture	-	-	-	-	-	-	-	-	-	-	-	-	-	-	-	-	-	-	-
GCA_028441365.1	-	Microbe sample from Acinetobacter baumannii	Ciconia ciconia	-	cell culture	-	-	-	-	-	-	-	-	-	-	-	-	-	-	-	-	-	-	-
GCA_028441345.1	-	Microbe sample from Acinetobacter baumannii	Ciconia ciconia	-	cell culture	-	-	-	-	-	-	-	-	-	-	-	-	-	-	-	-	-	-	-
GCA_028441315.1	-	Microbe sample from Acinetobacter baumannii	Ciconia ciconia	-	cell culture	-	-	-	-	-	-	-	-	-	-	-	-	-	-	-	-	-	-	-
GCA_028441305.1	-	Microbe sample from Acinetobacter baumannii	Ciconia ciconia	-	cell culture	-	-	-	-	-	-	-	-	-	-	-	-	-	-	-	-	-	-	-
GCA_028441275.1	-	Microbe sample from Acinetobacter baumannii	Ciconia ciconia	-	cell culture	-	-	-	-	-	-	-	-	-	-	-	-	-	-	-	-	-	-	-
GCA_028441265.1	-	Microbe sample from Acinetobacter baumannii	Ciconia ciconia	-	cell culture	-	-	-	-	-	-	-	-	-	-	-	-	-	-	-	-	-	-	-
GCA_028441245.1	-	Microbe sample from Acinetobacter baumannii	Ciconia ciconia	-	cell culture	-	-	-	-	-	-	-	-	-	-	-	-	-	-	-	-	-	-	-
GCA_028441215.1	-	Microbe sample from Acinetobacter baumannii	Ciconia ciconia	-	cell culture	-	-	-	-	-	-	-	-	-	-	-	-	-	-	-	-	-	-	-
GCA_028441205.1	-	Microbe sample from Acinetobacter baumannii	Ciconia ciconia	-	cell culture	-	-	-	-	-	-	-	-	-	-	-	-	-	-	-	-	-	-	-
GCA_028441185.1	-	Microbe sample from Acinetobacter baumannii	Ciconia ciconia	-	cell culture	-	-	-	-	-	-	-	-	-	-	-	-	-	-	-	-	-	-	-
GCA_028441165.1	-	Microbe sample from Acinetobacter baumannii	Ciconia ciconia	-	cell culture	-	-	-	-	-	-	-	-	-	-	-	-	-	-	-	-	-	-	-
GCA_028441145.1	-	Microbe sample from Acinetobacter baumannii	Ciconia ciconia	-	cell culture	-	-	-	-	-	-	-	-	-	-	-	-	-	-	-	-	-	-	-
GCA_028441125.1	-	Microbe sample from Acinetobacter baumannii	Ciconia ciconia	-	cell culture	-	-	-	-	-	-	-	-	-	-	-	-	-	-	-	-	-	-	-
GCA_028441105.1	-	Microbe sample from Acinetobacter baumannii	Ciconia ciconia	-	cell culture	-	-	-	-	-	-	-	-	-	-	-	-	-	-	-	-	-	-	-
GCA_028441085.1	-	Microbe sample from Acinetobacter baumannii	Ciconia ciconia	-	cell culture	-	-	-	-	-	-	-	-	-	-	-	-	-	-	-	-	-	-	-
GCA_028441065.1	-	Microbe sample from Acinetobacter baumannii	Ciconia ciconia	-	cell culture	-	-	-	-	-	-	-	-	-	-	-	-	-	-	-	-	-	-	-
GCA_028441045.1	-	Microbe sample from Acinetobacter baumannii	Ciconia ciconia	-	cell culture	-	-	-	-	-	-	-	-	-	-	-	-	-	-	-	-	-	-	-
GCA_028441025.1	-	Microbe sample from Acinetobacter baumannii	Ciconia ciconia	-	cell culture	-	-	-	-	-	-	-	-	-	-	-	-	-	-	-	-	-	-	-
GCA_028440995.1	-	Microbe sample from Acinetobacter baumannii	Ciconia ciconia	-	cell culture	-	-	-	-	-	-	-	-	-	-	-	-	-	-	-	-	-	-	-
GCA_028440985.1	-	Microbe sample from Acinetobacter baumannii	Ciconia ciconia	-	cell culture	-	-	-	-	-	-	-	-	-	-	-	-	-	-	-	-	-	-	-
GCA_028440965.1	-	Microbe sample from Acinetobacter baumannii	Ciconia ciconia	-	cell culture	-	-	-	-	-	-	-	-	-	-	-	-	-	-	-	-	-	-	-
GCA_028440945.1	-	Microbe sample from Acinetobacter baumannii	Ciconia ciconia	-	cell culture	-	-	-	-	-	-	-	-	-	-	-	-	-	-	-	-	-	-	-
GCA_028440925.1	-	Microbe sample from Acinetobacter baumannii	Ciconia ciconia	-	cell culture	-	-	-	-	-	-	-	-	-	-	-	-	-	-	-	-	-	-	-
GCA_028440905.1	-	Microbe sample from Acinetobacter baumannii	Ciconia ciconia	-	cell culture	-	-	-	-	-	-	-	-	-	-	-	-	-	-	-	-	-	-	-
GCA_028440875.1	-	Microbe sample from Acinetobacter baumannii	Ciconia ciconia	-	cell culture	-	-	-	-	-	-	-	-	-	-	-	-	-	-	-	-	-	-	-
GCA_028440865.1	-	Microbe sample from Acinetobacter baumannii	Ciconia ciconia	-	cell culture	-	-	-	-	-	-	-	-	-	-	-	-	-	-	-	-	-	-	-
GCA_028440825.1	-	Microbe sample from Acinetobacter baumannii	Ciconia ciconia	-	cell culture	-	-	-	-	-	-	-	-	-	-	-	-	-	-	-	-	-	-	-
GCA_028440815.1	-	Microbe sample from Acinetobacter baumannii	Ciconia ciconia	-	cell culture	-	-	-	-	-	-	-	-	-	-	-	-	-	-	-	-	-	-	-
GCA_028440805.1	-	Microbe sample from Acinetobacter baumannii	Ciconia ciconia	-	cell culture	-	-	-	-	-	-	-	-	-	-	-	-	-	-	-	-	-	-	-
GCA_028440775.1	-	Microbe sample from Acinetobacter baumannii	Ciconia ciconia	-	cell culture	-	-	-	-	-	-	-	-	-	-	-	-	-	-	-	-	-	-	-
GCA_028440765.1	-	Microbe sample from Acinetobacter baumannii	Ciconia ciconia	-	cell culture	-	-	-	-	-	-	-	-	-	-	-	-	-	-	-	-	-	-	-
GCA_028440745.1	-	Microbe sample from Acinetobacter baumannii	Ciconia ciconia	-	cell culture	-	-	-	-	-	-	-	-	-	-	-	-	-	-	-	-	-	-	-
GCA_028440725.1	-	Microbe sample from Acinetobacter baumannii	Ciconia ciconia	-	cell culture	-	-	-	-	-	-	-	-	-	-	-	-	-	-	-	-	-	-	-
GCA_028439325.1	-	Microbe sample from Acinetobacter baumannii	Ciconia ciconia	-	cell culture	-	-	-	-	-	-	-	-	-	-	-	-	-	-	-	-	-	-	-
GCA_028439305.1	-	Microbe sample from Acinetobacter baumannii	Ciconia ciconia	-	cell culture	-	-	-	-	-	-	-	-	-	-	-	-	-	-	-	-	-	-	-
GCA_028439275.1	-	Microbe sample from Acinetobacter baumannii	Ciconia ciconia	-	cell culture	-	-	-	-	-	-	-	-	-	-	-	-	-	-	-	-	-	-	-
GCA_028439265.1	-	Microbe sample from Acinetobacter baumannii	Ciconia ciconia	-	cell culture	-	-	-	-	-	-	-	-	-	-	-	-	-	-	-	-	-	-	-
GCA_028439235.1	-	Microbe sample from Acinetobacter baumannii	Ciconia ciconia	-	cell culture	-	-	-	-	-	-	-	-	-	-	-	-	-	-	-	-	-	-	-
GCA_028439225.1	-	Microbe sample from Acinetobacter baumannii	Ciconia ciconia	-	cell culture	-	-	-	-	-	-	-	-	-	-	-	-	-	-	-	-	-	-	-
GCA_028439205.1	-	Microbe sample from Acinetobacter baumannii	Ciconia ciconia	-	cell culture	-	-	-	-	-	-	-	-	-	-	-	-	-	-	-	-	-	-	-
GCA_028439185.1	-	Microbe sample from Acinetobacter baumannii	Ciconia ciconia	-	cell culture	-	-	-	-	-	-	-	-	-	-	-	-	-	-	-	-	-	-	-
GCA_028439155.1	-	Microbe sample from Acinetobacter baumannii	Ciconia ciconia	-	cell culture	-	-	-	-	-	-	-	-	-	-	-	-	-	-	-	-	-	-	-
GCA_028439145.1	-	Microbe sample from Acinetobacter baumannii	Ciconia ciconia	-	cell culture	-	-	-	-	-	-	-	-	-	-	-	-	-	-	-	-	-	-	-
GCA_028439125.1	-	Microbe sample from Acinetobacter baumannii	Ciconia ciconia	-	cell culture	-	-	-	-	-	-	-	-	-	-	-	-	-	-	-	-	-	-	-
GCA_028439105.1	-	Microbe sample from Acinetobacter baumannii	Ciconia ciconia	-	cell culture	-	-	-	-	-	-	-	-	-	-	-	-	-	-	-	-	-	-	-
GCA_028439085.1	-	Microbe sample from Acinetobacter baumannii	Ciconia ciconia	-	cell culture	-	-	-	-	-	-	-	-	-	-	-	-	-	-	-	-	-	-	-
GCA_028439065.1	-	Microbe sample from Acinetobacter baumannii	Ciconia ciconia	-	cell culture	-	-	-	-	-	-	-	-	-	-	-	-	-	-	-	-	-	-	-
GCA_028439025.1	-	Microbe sample from Acinetobacter baumannii	Ciconia ciconia	-	cell culture	-	-	-	-	-	-	-	-	-	-	-	-	-	-	-	-	-	-	-
GCA_028439015.1	-	Microbe sample from Acinetobacter baumannii	Ciconia ciconia	-	cell culture	-	-	-	-	-	-	-	-	-	-	-	-	-	-	-	-	-	-	-
GCA_028439005.1	-	Microbe sample from Acinetobacter baumannii	Ciconia ciconia	-	cell culture	-	-	-	-	-	-	-	-	-	-	-	-	-	-	-	-	-	-	-
GCA_028438985.1	-	Microbe sample from Acinetobacter baumannii	Ciconia ciconia	-	cell culture	-	-	-	-	-	-	-	-	-	-	-	-	-	-	-	-	-	-	-
GCA_028438945.1	-	Microbe sample from Acinetobacter baumannii	Ciconia ciconia	-	cell culture	-	-	-	-	-	-	-	-	-	-	-	-	-	-	-	-	-	-	-
GCA_028438915.1	-	Microbe sample from Acinetobacter baumannii	Ciconia ciconia	-	cell culture	-	-	-	-	-	-	-	-	-	-	-	-	-	-	-	-	-	-	-
GCA_028438505.1	-	Microbe sample from Acinetobacter baumannii	Pythonidae	-	cell culture	-	-	-	-	-	-	-	-	-	-	-	-	-	-	-	-	-	-	-
GCA_025291755.1	gut	MIMAG Metagenome-assembled Genome sample from Acinetobacter baumannii	Apis mellifera	BHI1-bin.3	metagenomic assembly	-	gut biome	gut biome	gut	-	gut metagenome	-	-	-	-	-	-	-	-	-	-	-	-	-
GCA_025291655.1	gut	MIMAG Metagenome-assembled Genome sample from Acinetobacter baumannii	Apis mellifera	BHI2-bin.4	metagenomic assembly	-	gut biome	gut biome	gut	-	gut metagenome	-	-	-	-	-	-	-	-	-	-	-	-	-
GCA_022953895.1	feces	Microbe sample from Acinetobacter baumannii	Lizard	IHIT35886	tissue sample	-	-	-	-	-	-	-	-	-	-	-	-	-	-	-	-	-	-	-
GCA_022936505.1	skin	Microbe sample from Acinetobacter baumannii	Lizard	IHIT35878	tissue sample	-	-	-	-	-	-	-	-	-	-	-	-	-	-	-	-	-	-	-
GCA_022935405.1	feces	Microbe sample from Acinetobacter baumannii	Snake	IHIT35882	tissue sample	-	-	-	-	-	-	-	-	-	-	-	-	-	-	-	-	-	-	-
GCA_022935365.1	feces	Microbe sample from Acinetobacter baumannii	Lizard	IHIT35890	tissue sample	-	-	-	-	-	-	-	-	-	-	-	-	-	-	-	-	-	-	-
GCA_022934405.1	feces	Microbe sample from Acinetobacter baumannii	Snake	IHIT35887	tissue sample	-	-	-	-	-	-	-	-	-	-	-	-	-	-	-	-	-	-	-
GCA_022933395.1	feces	Microbe sample from Acinetobacter baumannii	Lizard	IHIT35879	tissue sample	-	-	-	-	-	-	-	-	-	-	-	-	-	-	-	-	-	-	-
GCF_018883565.1	air	Microbe sample from Acinetobacter baumannii	-	missing	missing	-	-	-	-	-	-	-	-	-	-	-	-	-	-	-	-	-	-	-
GCA_028447345.1	air sample	Microbe sample from Acinetobacter baumannii	-	-	cell culture	-	-	-	-	-	-	-	-	-	-	-	-	-	-	-	-	-	-	-
GCA_028437675.1	air sample	Microbe sample from Acinetobacter baumannii	-	-	cell culture	-	-	-	-	-	-	-	-	-	-	-	-	-	-	-	-	-	-	-
GCF_030131585.1	Grass with Pig Manure	Pathogen	Not applicable	-	-	Not applicable	-	-	-	-	-	-	-	-	-	-	-	-	-	-	-	-	-	-
GCF_030131565.1	Grass with Chicken Manure	Pathogen	Not applicable	-	-	Not applicable	-	-	-	-	-	-	-	-	-	-	-	-	-	-	-	-	-	-
GCA_022967675.1	SHRIMP (SH)	Pathogen	-	-	-	-	-	-	-	-	-	-	-	-	-	-	-	-	-	-	-	-	-	-
GCA_022967635.1	SALMON (SA)	Pathogen	-	-	-	-	-	-	-	-	-	-	-	-	-	-	-	-	-	-	-	-	-	-
GCA_022967315.1	SALMON (SA)	Pathogen	-	-	-	-	-	-	-	-	-	-	-	-	-	-	-	-	-	-	-	-	-	-
GCA_022967295.1	SALMON (SA)	Pathogen	-	-	-	-	-	-	-	-	-	-	-	-	-	-	-	-	-	-	-	-	-	-
GCA_022967275.1	SHRIMP (SH)	Pathogen	-	-	-	-	-	-	-	-	-	-	-	-	-	-	-	-	-	-	-	-	-	-
GCA_022967255.1	SHRIMP (SH)	Pathogen	-	-	-	-	-	-	-	-	-	-	-	-	-	-	-	-	-	-	-	-	-	-
GCA_022967235.1	SALMON (SA)	Pathogen	-	-	-	-	-	-	-	-	-	-	-	-	-	-	-	-	-	-	-	-	-	-
GCA_022966975.1	SALMON (SA)	Pathogen	-	-	-	-	-	-	-	-	-	-	-	-	-	-	-	-	-	-	-	-	-	-
GCA_022966395.1	SALMON (SA)	Pathogen	-	-	-	-	-	-	-	-	-	-	-	-	-	-	-	-	-	-	-	-	-	-
GCF_039658635.1	petroleum in presence of CO2	Microbe sample from Acinetobacter baumannii	-	-	petroleum	-	-	-	-	-	-	-	-	-	-	-	-	-	-	-	-	-	-	-
GCF_039658615.1	petroleum in presence of CO2	Microbe sample from Acinetobacter baumannii	-	-	petroleum	-	-	-	-	-	-	-	-	-	-	-	-	-	-	-	-	-	-	-
GCF_039658595.1	petroleum in presence of CO2	Microbe sample from Acinetobacter baumannii	-	-	petroleum	-	-	-	-	-	-	-	-	-	-	-	-	-	-	-	-	-	-	-
GCF_039658575.1	petroleum in presence of CO2	Microbe sample from Acinetobacter baumannii	-	-	petroleum	-	-	-	-	-	-	-	-	-	-	-	-	-	-	-	-	-	-	-
GCF_026620155.1	oil reservoir	MIGS Cultured Bacterial/Archaeal sample from Acinetobacter baumannii	-	-	-	-	terrestrial environment	oil reservoir	production water	-	-	-	-	-	-	-	-	-	-	-	-	-	-	-
GCF_026189845.2	Draining-Matting Conveyor	Illumina whole genome sequence reads of Acinetobacter baumannii	-	-	cell culture	-	-	-	-	-	-	-	-	-	-	-	-	-	-	-	-	-	-	-
GCF_019903155.1	paper mill kaolin	Pathogen	-	-	-	-	-	-	-	-	-	-	-	-	-	-	-	-	-	-	-	-	-	-
GCA_019903235.1	paper pulp mill	Pathogen	-	-	-	-	-	-	-	-	-	-	-	-	-	-	-	-	-	-	-	-	-	-
GCA_027356985.1	sediment	MIMAG Metagenome-assembled Genome sample from Acinetobacter baumannii	-	clean83	metagenomic assembly	-	not collected	not collected	not collected	-	mine drainage metagenome	-	-	-	-	-	-	-	-	-	-	-	-	-
GCA_039658555.1	petroleum in presence of CO2	Microbe sample from Acinetobacter baumannii	-	-	petroleum	-	-	-	-	-	-	-	-	-	-	-	-	-	-	-	-	-	-	-
GCA_028438155.1	plant root	Microbe sample from Acinetobacter baumannii	-	-	cell culture	-	-	-	-	-	-	-	-	-	-	-	-	-	-	-	-	-	-	-
GCA_028438125.1	plant root	Microbe sample from Acinetobacter baumannii	-	-	cell culture	-	-	-	-	-	-	-	-	-	-	-	-	-	-	-	-	-	-	-
GCA_028438115.1	plant root	Microbe sample from Acinetobacter baumannii	-	-	cell culture	-	-	-	-	-	-	-	-	-	-	-	-	-	-	-	-	-	-	-
GCA_028438065.1	plant root	Microbe sample from Acinetobacter baumannii	-	-	cell culture	-	-	-	-	-	-	-	-	-	-	-	-	-	-	-	-	-	-	-
GCF_045985605.1	soil	One Health Enteric sample from Acinetobacter baumannii	-	-	-	-	soil	-	-	-	-	-	Environmental surveillance	-	-	-	-	-	-	environmental	-	-	-	-
GCF_045985545.1	soil	One Health Enteric sample from Acinetobacter baumannii	-	-	-	-	soil	-	-	-	-	-	Environmental surveillance	-	-	-	-	-	-	environmental	-	-	-	-
GCF_045985525.1	soil	One Health Enteric sample from Acinetobacter baumannii	-	-	-	-	soil	-	-	-	-	-	Environmental surveillance	-	-	-	-	-	-	environmental	-	-	-	-
GCF_045985465.1	soil	One Health Enteric sample from Acinetobacter baumannii	-	-	-	-	soil	-	-	-	-	-	Environmental surveillance	-	-	-	-	-	-	environmental	-	-	-	-
GCF_045985435.1	soil	One Health Enteric sample from Acinetobacter baumannii	-	-	-	-	soil	-	-	-	-	-	Environmental surveillance	-	-	-	-	-	-	environmental	-	-	-	-
GCF_045985425.1	soil	One Health Enteric sample from Acinetobacter baumannii	-	-	-	-	soil	-	-	-	-	-	Environmental surveillance	-	-	-	-	-	-	environmental	-	-	-	-
GCF_045985345.1	soil	One Health Enteric sample from Acinetobacter baumannii	-	-	-	-	soil	-	-	-	-	-	Environmental surveillance	-	-	-	-	-	-	environmental	-	-	-	-
GCF_045985285.1	soil	One Health Enteric sample from Acinetobacter baumannii	-	-	-	-	soil	-	-	-	-	-	Environmental surveillance	-	-	-	-	-	-	environmental	-	-	-	-
GCF_045985245.1	soil	One Health Enteric sample from Acinetobacter baumannii	-	-	-	-	soil	-	-	-	-	-	Environmental surveillance	-	-	-	-	-	-	environmental	-	-	-	-
GCF_045985225.1	soil	One Health Enteric sample from Acinetobacter baumannii	-	-	-	-	soil	-	-	-	-	-	Environmental surveillance	-	-	-	-	-	-	environmental	-	-	-	-
GCF_045985145.1	soil	One Health Enteric sample from Acinetobacter baumannii	-	-	-	-	soil	-	-	-	-	-	Environmental surveillance	-	-	-	-	-	-	environmental	-	-	-	-
GCF_045985125.1	soil	One Health Enteric sample from Acinetobacter baumannii	-	-	-	-	soil	-	-	-	-	-	Environmental surveillance	-	-	-	-	-	-	environmental	-	-	-	-
GCF_045985055.1	soil	One Health Enteric sample from Acinetobacter baumannii	-	-	-	-	soil	-	-	-	-	-	Environmental surveillance	-	-	-	-	-	-	environmental	-	-	-	-
GCF_045985025.1	soil	One Health Enteric sample from Acinetobacter baumannii	-	-	-	-	soil	-	-	-	-	-	Environmental surveillance	-	-	-	-	-	-	environmental	-	-	-	-
GCF_045984965.1	soil	One Health Enteric sample from Acinetobacter baumannii	-	-	-	-	soil	-	-	-	-	-	Environmental surveillance	-	-	-	-	-	-	environmental	-	-	-	-
GCF_045984945.1	soil	One Health Enteric sample from Acinetobacter baumannii	-	-	-	-	soil	-	-	-	-	-	Environmental surveillance	-	-	-	-	-	-	environmental	-	-	-	-
GCF_045984905.1	soil	One Health Enteric sample from Acinetobacter baumannii	-	-	-	-	soil	-	-	-	-	-	Environmental surveillance	-	-	-	-	-	-	environmental	-	-	-	-
GCF_045984865.1	soil	One Health Enteric sample from Acinetobacter baumannii	-	-	-	-	soil	-	-	-	-	-	Environmental surveillance	-	-	-	-	-	-	environmental	-	-	-	-
GCF_045984825.1	soil	One Health Enteric sample from Acinetobacter baumannii	-	-	-	-	soil	-	-	-	-	-	Environmental surveillance	-	-	-	-	-	-	environmental	-	-	-	-
GCF_045984785.1	soil	One Health Enteric sample from Acinetobacter baumannii	-	-	-	-	soil	-	-	-	-	-	Environmental surveillance	-	-	-	-	-	-	environmental	-	-	-	-
GCF_045984705.1	soil	One Health Enteric sample from Acinetobacter baumannii	-	-	-	-	soil	-	-	-	-	-	Environmental surveillance	-	-	-	-	-	-	environmental	-	-	-	-
GCF_045984675.1	soil	One Health Enteric sample from Acinetobacter baumannii	-	-	-	-	soil	-	-	-	-	-	Environmental surveillance	-	-	-	-	-	-	environmental	-	-	-	-
GCF_045984645.1	soil	One Health Enteric sample from Acinetobacter baumannii	-	-	-	-	soil	-	-	-	-	-	Environmental surveillance	-	-	-	-	-	-	environmental	-	-	-	-
GCF_045984625.1	soil	One Health Enteric sample from Acinetobacter baumannii	-	-	-	-	soil	-	-	-	-	-	Environmental surveillance	-	-	-	-	-	-	environmental	-	-	-	-
GCF_045345925.1	soil	MIGS Cultured Bacterial/Archaeal sample from Acinetobacter baumannii	-	-	-	-	soil	soil	soil	-	-	-	-	-	-	-	-	-	-	-	-	-	-	-
GCF_039658655.1	contamined soil	Microbe sample from Acinetobacter baumannii	-	-	contamined soil	-	-	-	-	-	-	-	-	-	-	-	-	-	-	-	-	-	-	-
GCF_033345455.1	unpolluted field from farm land	Microbe sample from Acinetobacter baumannii	-	-	missing	-	-	-	-	-	-	-	-	-	-	-	-	-	-	-	-	-	-	-
GCF_030131625.1	Control Grass (No Manure)	Pathogen	Not applicable	-	-	Not applicable	-	-	-	-	-	-	-	-	-	-	-	-	-	-	-	-	-	-
GCF_030131545.1	Control Grass (No Manure)	Pathogen	Not applicable	-	-	Not applicable	-	-	-	-	-	-	-	-	-	-	-	-	-	-	-	-	-	-
GCF_030131525.1	Grass with Chicken Manure	Pathogen	Not applicable	-	-	Not applicable	-	-	-	-	-	-	-	-	-	-	-	-	-	-	-	-	-	-
GCF_030131505.1	Background Grass (no manure on field)	Pathogen	Not applicable	-	-	Not applicable	-	-	-	-	-	-	-	-	-	-	-	-	-	-	-	-	-	-
GCF_030131485.1	Grass with Chicken Manure	Pathogen	Not applicable	-	-	Not applicable	-	-	-	-	-	-	-	-	-	-	-	-	-	-	-	-	-	-
GCF_030131465.1	Background Grass (no manure on field)	Pathogen	Not applicable	-	-	Not applicable	-	-	-	-	-	-	-	-	-	-	-	-	-	-	-	-	-	-
GCF_030131445.1	Control Grass (No Manure)	Pathogen	Not applicable	-	-	Not applicable	-	-	-	-	-	-	-	-	-	-	-	-	-	-	-	-	-	-
GCF_030131425.1	Grass with Chicken Manure	Pathogen	Not applicable	-	-	Not applicable	-	-	-	-	-	-	-	-	-	-	-	-	-	-	-	-	-	-
GCF_030131405.1	Background Grass (no manure on field)	Pathogen	Not applicable	-	-	Not applicable	-	-	-	-	-	-	-	-	-	-	-	-	-	-	-	-	-	-
GCF_030131385.1	Grass with Chicken Manure	Pathogen	Not applicable	-	-	Not applicable	-	-	-	-	-	-	-	-	-	-	-	-	-	-	-	-	-	-
GCF_030131365.1	Grass with Chicken Manure	Pathogen	Not applicable	-	-	Not applicable	-	-	-	-	-	-	-	-	-	-	-	-	-	-	-	-	-	-
GCF_030131345.1	Background Grass (no manure on field)	Pathogen	Not applicable	-	-	Not applicable	-	-	-	-	-	-	-	-	-	-	-	-	-	-	-	-	-	-
GCF_030131325.1	Background Grass (no manure on field)	Pathogen	Not applicable	-	-	Not applicable	-	-	-	-	-	-	-	-	-	-	-	-	-	-	-	-	-	-
GCF_030131305.1	Grass with Chicken Manure	Pathogen	Not applicable	-	-	Not applicable	-	-	-	-	-	-	-	-	-	-	-	-	-	-	-	-	-	-
GCF_030131285.1	Background Grass (no manure on field)	Pathogen	Not applicable	-	-	Not applicable	-	-	-	-	-	-	-	-	-	-	-	-	-	-	-	-	-	-
GCF_030131265.1	Grass with Chicken Manure	Pathogen	Not applicable	-	-	Not applicable	-	-	-	-	-	-	-	-	-	-	-	-	-	-	-	-	-	-
GCF_030131245.1	Grass with Chicken Manure	Pathogen	Not applicable	-	-	Not applicable	-	-	-	-	-	-	-	-	-	-	-	-	-	-	-	-	-	-
GCF_030131225.1	Control Grass (No Manure)	Pathogen	Not applicable	-	-	Not applicable	-	-	-	-	-	-	-	-	-	-	-	-	-	-	-	-	-	-
GCF_030131195.1	Grass with Cow Manure	Pathogen	Not applicable	-	-	Not applicable	-	-	-	-	-	-	-	-	-	-	-	-	-	-	-	-	-	-
GCF_030131185.1	Control Grass (No Manure)	Pathogen	Not applicable	-	-	Not applicable	-	-	-	-	-	-	-	-	-	-	-	-	-	-	-	-	-	-
GCF_030131155.1	Grass with Pig Manure	Pathogen	Not applicable	-	-	Not applicable	-	-	-	-	-	-	-	-	-	-	-	-	-	-	-	-	-	-
GCF_030131145.1	Grass with Chicken Manure	Pathogen	Not applicable	-	-	Not applicable	-	-	-	-	-	-	-	-	-	-	-	-	-	-	-	-	-	-
GCF_030131125.1	Grass with Pig Manure	Pathogen	Not applicable	-	-	Not applicable	-	-	-	-	-	-	-	-	-	-	-	-	-	-	-	-	-	-
GCF_030131105.1	Grass with Chicken Manure	Pathogen	Not applicable	-	-	Not applicable	-	-	-	-	-	-	-	-	-	-	-	-	-	-	-	-	-	-
GCF_030131085.1	Control Grass (No Manure)	Pathogen	Not applicable	-	-	Not applicable	-	-	-	-	-	-	-	-	-	-	-	-	-	-	-	-	-	-
GCF_030131065.1	Grass with Cow Manure	Pathogen	Not applicable	-	-	Not applicable	-	-	-	-	-	-	-	-	-	-	-	-	-	-	-	-	-	-
GCF_030131045.1	Grass with Cow Manure	Pathogen	Not applicable	-	-	Not applicable	-	-	-	-	-	-	-	-	-	-	-	-	-	-	-	-	-	-
GCF_030131025.1	Grass with Cow Manure	Pathogen	Not applicable	-	-	Not applicable	-	-	-	-	-	-	-	-	-	-	-	-	-	-	-	-	-	-
GCF_030131005.1	Grass with Cow Manure	Pathogen	Not applicable	-	-	Not applicable	-	-	-	-	-	-	-	-	-	-	-	-	-	-	-	-	-	-
GCF_030130985.1	Grass with Chicken Manure	Pathogen	Not applicable	-	-	Not applicable	-	-	-	-	-	-	-	-	-	-	-	-	-	-	-	-	-	-
GCF_030130955.1	Grass with Chicken Manure	Pathogen	Not applicable	-	-	Not applicable	-	-	-	-	-	-	-	-	-	-	-	-	-	-	-	-	-	-
GCF_030130935.1	Grass with Cow Manure	Pathogen	Not applicable	-	-	Not applicable	-	-	-	-	-	-	-	-	-	-	-	-	-	-	-	-	-	-
GCF_030130925.1	Grass with Cow Manure	Pathogen	Not applicable	-	-	Not applicable	-	-	-	-	-	-	-	-	-	-	-	-	-	-	-	-	-	-
GCF_030130895.1	Grass with Chicken Manure	Pathogen	Not applicable	-	-	Not applicable	-	-	-	-	-	-	-	-	-	-	-	-	-	-	-	-	-	-
GCF_030130885.1	Grass with Cow Manure	Pathogen	Not applicable	-	-	Not applicable	-	-	-	-	-	-	-	-	-	-	-	-	-	-	-	-	-	-
GCF_030130865.1	Control Grass (No Manure)	Pathogen	Not applicable	-	-	Not applicable	-	-	-	-	-	-	-	-	-	-	-	-	-	-	-	-	-	-
GCF_030130845.1	Control Grass (No Manure)	Pathogen	Not applicable	-	-	Not applicable	-	-	-	-	-	-	-	-	-	-	-	-	-	-	-	-	-	-
GCF_030130825.1	Grass with Cow Manure	Pathogen	Not applicable	-	-	Not applicable	-	-	-	-	-	-	-	-	-	-	-	-	-	-	-	-	-	-
GCF_030130795.1	Control Grass (No Manure)	Pathogen	Not applicable	-	-	Not applicable	-	-	-	-	-	-	-	-	-	-	-	-	-	-	-	-	-	-
GCF_030130785.1	Grass with Chicken Manure	Pathogen	Not applicable	-	-	Not applicable	-	-	-	-	-	-	-	-	-	-	-	-	-	-	-	-	-	-
GCF_030130765.1	Grass with Chicken Manure	Pathogen	Not applicable	-	-	Not applicable	-	-	-	-	-	-	-	-	-	-	-	-	-	-	-	-	-	-
GCF_030130735.1	Grass with Chicken Manure	Pathogen	Not applicable	-	-	Not applicable	-	-	-	-	-	-	-	-	-	-	-	-	-	-	-	-	-	-
GCF_030130725.1	Grass with Chicken Manure	Pathogen	Not applicable	-	-	Not applicable	-	-	-	-	-	-	-	-	-	-	-	-	-	-	-	-	-	-
GCF_030130695.1	Control Grass (No Manure)	Pathogen	Not applicable	-	-	Not applicable	-	-	-	-	-	-	-	-	-	-	-	-	-	-	-	-	-	-
GCF_030130685.1	Grass with Pig Manure	Pathogen	Not applicable	-	-	Not applicable	-	-	-	-	-	-	-	-	-	-	-	-	-	-	-	-	-	-
GCF_030130665.1	Background Grass (no manure on field)	Pathogen	Not applicable	-	-	Not applicable	-	-	-	-	-	-	-	-	-	-	-	-	-	-	-	-	-	-
GCF_030130645.1	Control Grass (No Manure)	Pathogen	Not applicable	-	-	Not applicable	-	-	-	-	-	-	-	-	-	-	-	-	-	-	-	-	-	-
GCF_030130605.1	Control Grass (No Manure)	Pathogen	Not applicable	-	-	Not applicable	-	-	-	-	-	-	-	-	-	-	-	-	-	-	-	-	-	-
GCF_030130585.1	Control Grass (No Manure)	Pathogen	Not applicable	-	-	Not applicable	-	-	-	-	-	-	-	-	-	-	-	-	-	-	-	-	-	-
GCF_030130555.1	Background Grass (no manure on field)	Pathogen	Not applicable	-	-	Not applicable	-	-	-	-	-	-	-	-	-	-	-	-	-	-	-	-	-	-
GCF_030130545.1	Grass with Chicken Manure	Pathogen	Not applicable	-	-	Not applicable	-	-	-	-	-	-	-	-	-	-	-	-	-	-	-	-	-	-
GCF_030130045.1	Grass with Pig Manure	Pathogen	Not applicable	-	-	Not applicable	-	-	-	-	-	-	-	-	-	-	-	-	-	-	-	-	-	-
GCF_030130025.1	Background Grass (no manure on field)	Pathogen	Not applicable	-	-	Not applicable	-	-	-	-	-	-	-	-	-	-	-	-	-	-	-	-	-	-
GCF_030130005.1	Control Grass (No Manure)	Pathogen	Not applicable	-	-	Not applicable	-	-	-	-	-	-	-	-	-	-	-	-	-	-	-	-	-	-
GCF_030129975.1	Control Grass (No Manure)	Pathogen	Not applicable	-	-	Not applicable	-	-	-	-	-	-	-	-	-	-	-	-	-	-	-	-	-	-
GCF_030129955.1	Grass with Chicken Manure	Pathogen	Not applicable	-	-	Not applicable	-	-	-	-	-	-	-	-	-	-	-	-	-	-	-	-	-	-
GCF_030129925.1	Background Grass (no manure on field)	Pathogen	Not applicable	-	-	Not applicable	-	-	-	-	-	-	-	-	-	-	-	-	-	-	-	-	-	-
GCF_030129905.1	Grass with Chicken Manure	Pathogen	Not applicable	-	-	Not applicable	-	-	-	-	-	-	-	-	-	-	-	-	-	-	-	-	-	-
GCF_030129885.1	Grass with Chicken Manure	Pathogen	Not applicable	-	-	Not applicable	-	-	-	-	-	-	-	-	-	-	-	-	-	-	-	-	-	-
GCF_025246225.1	soil	Pathogen	-	-	-	-	Soil	semi pristine env	swab of surface	-	-	-	-	-	-	-	-	-	-	-	-	-	-	-
GCF_022014125.1	soil sample	Microbe sample from Acinetobacter baumannii	-	-	Soil sample	-	-	-	-	-	-	-	-	-	-	-	-	-	-	-	-	-	-	-
GCF_019903195.1	field soil	Pathogen	-	-	-	-	-	-	-	-	-	-	-	-	-	-	-	-	-	-	-	-	-	-
GCF_019903175.1	field soil	Pathogen	-	-	-	-	-	-	-	-	-	-	-	-	-	-	-	-	-	-	-	-	-	-
GCF_008632635.1	soil	Pathogen	-	-	-	-	-	-	-	-	-	-	-	-	-	-	-	-	-	-	-	-	-	-
GCF_004912245.1	soil	Microbe sample from Acinetobacter baumannii	-	-	Cell culture	-	-	-	-	-	-	-	-	-	-	-	-	-	-	-	-	-	-	-
GCF_000465635.2	vegetable market soil	Sample from Acinetobacter baumannii EGD-HP18	-	-	-	-	-	-	-	-	-	-	-	-	-	-	-	-	-	-	-	-	-	-
GCF_000341985.1	mangrove soil	Sample from Acinetobacter baumannii MSP4-16	-	-	-	-	-	-	-	-	-	-	-	-	-	-	-	-	-	-	-	-	-	-
GCA_028447855.1	soil	Microbe sample from Acinetobacter baumannii	-	-	cell culture	-	-	-	-	-	-	-	-	-	-	-	-	-	-	-	-	-	-	-
GCA_028447845.1	soil	Microbe sample from Acinetobacter baumannii	-	-	cell culture	-	-	-	-	-	-	-	-	-	-	-	-	-	-	-	-	-	-	-
GCA_028447815.1	soil	Microbe sample from Acinetobacter baumannii	-	-	cell culture	-	-	-	-	-	-	-	-	-	-	-	-	-	-	-	-	-	-	-
GCA_028447805.1	soil	Microbe sample from Acinetobacter baumannii	-	-	cell culture	-	-	-	-	-	-	-	-	-	-	-	-	-	-	-	-	-	-	-
GCA_028447785.1	soil	Microbe sample from Acinetobacter baumannii	-	-	cell culture	-	-	-	-	-	-	-	-	-	-	-	-	-	-	-	-	-	-	-
GCA_028447765.1	soil	Microbe sample from Acinetobacter baumannii	-	-	cell culture	-	-	-	-	-	-	-	-	-	-	-	-	-	-	-	-	-	-	-
GCA_028447745.1	soil	Microbe sample from Acinetobacter baumannii	-	-	cell culture	-	-	-	-	-	-	-	-	-	-	-	-	-	-	-	-	-	-	-
GCA_028447715.1	soil	Microbe sample from Acinetobacter baumannii	-	-	cell culture	-	-	-	-	-	-	-	-	-	-	-	-	-	-	-	-	-	-	-
GCA_028447705.1	soil	Microbe sample from Acinetobacter baumannii	-	-	cell culture	-	-	-	-	-	-	-	-	-	-	-	-	-	-	-	-	-	-	-
GCA_028447685.1	soil	Microbe sample from Acinetobacter baumannii	-	-	cell culture	-	-	-	-	-	-	-	-	-	-	-	-	-	-	-	-	-	-	-
GCA_028447655.1	soil	Microbe sample from Acinetobacter baumannii	-	-	cell culture	-	-	-	-	-	-	-	-	-	-	-	-	-	-	-	-	-	-	-
GCA_028447645.1	soil	Microbe sample from Acinetobacter baumannii	-	-	cell culture	-	-	-	-	-	-	-	-	-	-	-	-	-	-	-	-	-	-	-
GCA_028447625.1	soil	Microbe sample from Acinetobacter baumannii	-	-	cell culture	-	-	-	-	-	-	-	-	-	-	-	-	-	-	-	-	-	-	-
GCA_028447595.1	soil	Microbe sample from Acinetobacter baumannii	-	-	cell culture	-	-	-	-	-	-	-	-	-	-	-	-	-	-	-	-	-	-	-
GCA_028447585.1	soil	Microbe sample from Acinetobacter baumannii	-	-	cell culture	-	-	-	-	-	-	-	-	-	-	-	-	-	-	-	-	-	-	-
GCA_028447525.1	soil	Microbe sample from Acinetobacter baumannii	-	-	cell culture	-	-	-	-	-	-	-	-	-	-	-	-	-	-	-	-	-	-	-
GCA_028447505.1	soil	Microbe sample from Acinetobacter baumannii	-	-	cell culture	-	-	-	-	-	-	-	-	-	-	-	-	-	-	-	-	-	-	-
GCA_028447485.1	soil	Microbe sample from Acinetobacter baumannii	-	-	cell culture	-	-	-	-	-	-	-	-	-	-	-	-	-	-	-	-	-	-	-
GCA_028447455.1	soil	Microbe sample from Acinetobacter baumannii	-	-	cell culture	-	-	-	-	-	-	-	-	-	-	-	-	-	-	-	-	-	-	-
GCA_028447445.1	soil	Microbe sample from Acinetobacter baumannii	-	-	cell culture	-	-	-	-	-	-	-	-	-	-	-	-	-	-	-	-	-	-	-
GCA_028447425.1	soil	Microbe sample from Acinetobacter baumannii	-	-	cell culture	-	-	-	-	-	-	-	-	-	-	-	-	-	-	-	-	-	-	-
GCA_028447405.1	soil	Microbe sample from Acinetobacter baumannii	-	-	cell culture	-	-	-	-	-	-	-	-	-	-	-	-	-	-	-	-	-	-	-
GCA_028447385.1	soil	Microbe sample from Acinetobacter baumannii	-	-	cell culture	-	-	-	-	-	-	-	-	-	-	-	-	-	-	-	-	-	-	-
GCA_028447305.1	soil	Microbe sample from Acinetobacter baumannii	-	-	cell culture	-	-	-	-	-	-	-	-	-	-	-	-	-	-	-	-	-	-	-
GCA_028444495.1	-	Microbe sample from Acinetobacter baumannii	Lumbricina	-	cell culture	-	-	-	-	-	-	-	-	-	-	-	-	-	-	-	-	-	-	-
GCA_028443475.1	soil	Microbe sample from Acinetobacter baumannii	-	-	cell culture	-	-	-	-	-	-	-	-	-	-	-	-	-	-	-	-	-	-	-
GCA_028443465.1	soil	Microbe sample from Acinetobacter baumannii	-	-	cell culture	-	-	-	-	-	-	-	-	-	-	-	-	-	-	-	-	-	-	-
GCA_028443435.1	soil	Microbe sample from Acinetobacter baumannii	-	-	cell culture	-	-	-	-	-	-	-	-	-	-	-	-	-	-	-	-	-	-	-
GCA_028443425.1	soil	Microbe sample from Acinetobacter baumannii	-	-	cell culture	-	-	-	-	-	-	-	-	-	-	-	-	-	-	-	-	-	-	-
GCA_028443405.1	soil	Microbe sample from Acinetobacter baumannii	-	-	cell culture	-	-	-	-	-	-	-	-	-	-	-	-	-	-	-	-	-	-	-
GCA_028443375.1	soil	Microbe sample from Acinetobacter baumannii	-	-	cell culture	-	-	-	-	-	-	-	-	-	-	-	-	-	-	-	-	-	-	-
GCA_028443365.1	-	Microbe sample from Acinetobacter baumannii	Lumbricina	-	cell culture	-	-	-	-	-	-	-	-	-	-	-	-	-	-	-	-	-	-	-
GCA_028443315.1	-	Microbe sample from Acinetobacter baumannii	Lumbricina	-	cell culture	-	-	-	-	-	-	-	-	-	-	-	-	-	-	-	-	-	-	-
GCA_028442975.1	-	Microbe sample from Acinetobacter baumannii	Lumbricina	-	cell culture	-	-	-	-	-	-	-	-	-	-	-	-	-	-	-	-	-	-	-
GCA_028442895.1	soil	Microbe sample from Acinetobacter baumannii	-	-	cell culture	-	-	-	-	-	-	-	-	-	-	-	-	-	-	-	-	-	-	-
GCA_028442875.1	soil	Microbe sample from Acinetobacter baumannii	-	-	cell culture	-	-	-	-	-	-	-	-	-	-	-	-	-	-	-	-	-	-	-
GCA_028442865.1	soil	Microbe sample from Acinetobacter baumannii	-	-	cell culture	-	-	-	-	-	-	-	-	-	-	-	-	-	-	-	-	-	-	-
GCA_028442845.1	soil	Microbe sample from Acinetobacter baumannii	-	-	cell culture	-	-	-	-	-	-	-	-	-	-	-	-	-	-	-	-	-	-	-
GCA_028442825.1	soil	Microbe sample from Acinetobacter baumannii	-	-	cell culture	-	-	-	-	-	-	-	-	-	-	-	-	-	-	-	-	-	-	-
GCA_028442805.1	soil	Microbe sample from Acinetobacter baumannii	-	-	cell culture	-	-	-	-	-	-	-	-	-	-	-	-	-	-	-	-	-	-	-
GCA_028442785.1	soil	Microbe sample from Acinetobacter baumannii	-	-	cell culture	-	-	-	-	-	-	-	-	-	-	-	-	-	-	-	-	-	-	-
GCA_028442755.1	soil	Microbe sample from Acinetobacter baumannii	-	-	cell culture	-	-	-	-	-	-	-	-	-	-	-	-	-	-	-	-	-	-	-
GCA_028442745.1	soil	Microbe sample from Acinetobacter baumannii	-	-	cell culture	-	-	-	-	-	-	-	-	-	-	-	-	-	-	-	-	-	-	-
GCA_028442725.1	soil	Microbe sample from Acinetobacter baumannii	-	-	cell culture	-	-	-	-	-	-	-	-	-	-	-	-	-	-	-	-	-	-	-
GCA_028442705.1	soil	Microbe sample from Acinetobacter baumannii	-	-	cell culture	-	-	-	-	-	-	-	-	-	-	-	-	-	-	-	-	-	-	-
GCA_028442685.1	soil	Microbe sample from Acinetobacter baumannii	-	-	cell culture	-	-	-	-	-	-	-	-	-	-	-	-	-	-	-	-	-	-	-
GCA_028442655.1	soil	Microbe sample from Acinetobacter baumannii	-	-	cell culture	-	-	-	-	-	-	-	-	-	-	-	-	-	-	-	-	-	-	-
GCA_028442645.1	soil	Microbe sample from Acinetobacter baumannii	-	-	cell culture	-	-	-	-	-	-	-	-	-	-	-	-	-	-	-	-	-	-	-
GCA_028442625.1	soil	Microbe sample from Acinetobacter baumannii	-	-	cell culture	-	-	-	-	-	-	-	-	-	-	-	-	-	-	-	-	-	-	-
GCA_028442605.1	soil	Microbe sample from Acinetobacter baumannii	-	-	cell culture	-	-	-	-	-	-	-	-	-	-	-	-	-	-	-	-	-	-	-
GCA_028442445.1	soil	Microbe sample from Acinetobacter baumannii	-	-	cell culture	-	-	-	-	-	-	-	-	-	-	-	-	-	-	-	-	-	-	-
GCA_028442415.1	soil	Microbe sample from Acinetobacter baumannii	-	-	cell culture	-	-	-	-	-	-	-	-	-	-	-	-	-	-	-	-	-	-	-
GCA_028438925.1	-	Microbe sample from Acinetobacter baumannii	lumbricina	-	cell culture	-	-	-	-	-	-	-	-	-	-	-	-	-	-	-	-	-	-	-
GCA_028438205.1	soil	Microbe sample from Acinetobacter baumannii	-	-	cell culture	-	-	-	-	-	-	-	-	-	-	-	-	-	-	-	-	-	-	-
GCA_028438085.1	soil	Microbe sample from Acinetobacter baumannii	-	-	cell culture	-	-	-	-	-	-	-	-	-	-	-	-	-	-	-	-	-	-	-
GCA_028438035.1	-	Microbe sample from Acinetobacter baumannii	Lumbricina	-	cell culture	-	-	-	-	-	-	-	-	-	-	-	-	-	-	-	-	-	-	-
GCA_028438025.1	soil	Microbe sample from Acinetobacter baumannii	-	-	cell culture	-	-	-	-	-	-	-	-	-	-	-	-	-	-	-	-	-	-	-
GCA_028438005.1	soil	Microbe sample from Acinetobacter baumannii	-	-	cell culture	-	-	-	-	-	-	-	-	-	-	-	-	-	-	-	-	-	-	-
GCA_028437985.1	soil	Microbe sample from Acinetobacter baumannii	-	-	cell culture	-	-	-	-	-	-	-	-	-	-	-	-	-	-	-	-	-	-	-
GCA_028437955.1	soil	Microbe sample from Acinetobacter baumannii	-	-	cell culture	-	-	-	-	-	-	-	-	-	-	-	-	-	-	-	-	-	-	-
GCA_028437945.1	soil	Microbe sample from Acinetobacter baumannii	-	-	cell culture	-	-	-	-	-	-	-	-	-	-	-	-	-	-	-	-	-	-	-
GCA_028437925.1	soil	Microbe sample from Acinetobacter baumannii	-	-	cell culture	-	-	-	-	-	-	-	-	-	-	-	-	-	-	-	-	-	-	-
GCA_028437905.1	soil	Microbe sample from Acinetobacter baumannii	-	-	cell culture	-	-	-	-	-	-	-	-	-	-	-	-	-	-	-	-	-	-	-
GCA_028437885.1	soil	Microbe sample from Acinetobacter baumannii	-	-	cell culture	-	-	-	-	-	-	-	-	-	-	-	-	-	-	-	-	-	-	-
GCA_028437865.1	soil	Microbe sample from Acinetobacter baumannii	-	-	cell culture	-	-	-	-	-	-	-	-	-	-	-	-	-	-	-	-	-	-	-
GCA_028437845.1	soil	Microbe sample from Acinetobacter baumannii	-	-	cell culture	-	-	-	-	-	-	-	-	-	-	-	-	-	-	-	-	-	-	-
GCA_028437825.1	soil	Microbe sample from Acinetobacter baumannii	-	-	cell culture	-	-	-	-	-	-	-	-	-	-	-	-	-	-	-	-	-	-	-
GCA_028437805.1	soil	Microbe sample from Acinetobacter baumannii	-	-	cell culture	-	-	-	-	-	-	-	-	-	-	-	-	-	-	-	-	-	-	-
GCA_028437775.1	soil	Microbe sample from Acinetobacter baumannii	-	-	cell culture	-	-	-	-	-	-	-	-	-	-	-	-	-	-	-	-	-	-	-
GCA_028437765.1	soil	Microbe sample from Acinetobacter baumannii	-	-	cell culture	-	-	-	-	-	-	-	-	-	-	-	-	-	-	-	-	-	-	-
GCA_003012895.3	soil	Whole genome sequencing of Acinetobacter baumannii DS002	-	-	Whole organism	-	-	-	-	-	-	-	-	-	-	-	-	-	-	-	-	-	-	-
GCF_013140365.1	environmental isolate	Microbe sample from Acinetobacter baumannii	-	-	cell culture	-	-	-	-	-	-	-	-	-	-	-	-	-	-	-	-	-	-	-
GCF_013140355.1	environmental isolate	Microbe sample from Acinetobacter baumannii	-	-	cell culture	-	-	-	-	-	-	-	-	-	-	-	-	-	-	-	-	-	-	-
GCF_013140315.1	environmental isolate	Microbe sample from Acinetobacter baumannii	-	-	cell culture	-	-	-	-	-	-	-	-	-	-	-	-	-	-	-	-	-	-	-
GCF_013140305.1	environmental isolate	Microbe sample from Acinetobacter baumannii	-	-	cell culture	-	-	-	-	-	-	-	-	-	-	-	-	-	-	-	-	-	-	-
GCF_013140295.1	environmental isolate	Microbe sample from Acinetobacter baumannii	-	-	cell culture	-	-	-	-	-	-	-	-	-	-	-	-	-	-	-	-	-	-	-
GCF_013140275.1	environmental isolate	Microbe sample from Acinetobacter baumannii	-	-	cell culture	-	-	-	-	-	-	-	-	-	-	-	-	-	-	-	-	-	-	-
GCF_013140255.1	environmental isolate	Microbe sample from Acinetobacter baumannii	-	-	cell culture	-	-	-	-	-	-	-	-	-	-	-	-	-	-	-	-	-	-	-
GCF_009710715.1	Enviromental	Microbe sample from Acinetobacter baumannii	-	-	missing	-	-	-	-	-	-	-	-	-	-	-	-	-	-	-	-	-	-	-
GCA_036832955.1	urban	SRX822397	-	CTOTU47666	metagenomic assembly	-	urban	missing	missing	-	urban metagenome	-	-	-	-	-	-	missing	-	-	-	-	-	-
GCA_032087635.1	urban	MIMAG Metagenome-assembled Genome sample from Acinetobacter baumannii	-	CTOTU50840	metagenomic assembly	-	urban	Missing	Missing	-	urban metagenome	-	-	-	-	-	-	-	-	-	-	-	-	-
GCA_032007085.1	urban	MIMAG Metagenome-assembled Genome sample from Acinetobacter baumannii	-	CTOTU47523	metagenomic assembly	-	urban	Missing	Missing	-	urban metagenome	-	-	-	-	-	-	-	-	-	-	-	-	-
GCA_032001925.1	urban	MIMAG Metagenome-assembled Genome sample from Acinetobacter baumannii	-	CTOTU48210	metagenomic assembly	-	urban	Missing	Missing	-	urban metagenome	-	-	-	-	-	-	-	-	-	-	-	-	-
GCA_031983725.1	urban	MIMAG Metagenome-assembled Genome sample from Acinetobacter baumannii	-	CTOTU47078	metagenomic assembly	-	urban	Missing	Missing	-	urban metagenome	-	-	-	-	-	-	-	-	-	-	-	-	-
GCA_031983165.1	urban	MIMAG Metagenome-assembled Genome sample from Acinetobacter baumannii	-	CTOTU47147	metagenomic assembly	-	urban	Missing	Missing	-	urban metagenome	-	-	-	-	-	-	-	-	-	-	-	-	-
GCA_031979965.1	urban	MIMAG Metagenome-assembled Genome sample from Acinetobacter baumannii	-	CTOTU46909	metagenomic assembly	-	urban	Missing	Missing	-	urban metagenome	-	-	-	-	-	-	-	-	-	-	-	-	-
GCA_031976745.1	urban	MIMAG Metagenome-assembled Genome sample from Acinetobacter baumannii	-	CTOTU46837	metagenomic assembly	-	urban	Missing	Missing	-	urban metagenome	-	-	-	-	-	-	-	-	-	-	-	-	-
GCA_031975655.1	urban	MIMAG Metagenome-assembled Genome sample from Acinetobacter baumannii	-	CTOTU46716	metagenomic assembly	-	urban	Missing	Missing	-	urban metagenome	-	-	-	-	-	-	-	-	-	-	-	-	-
GCA_002386695.1	wood	Uncultivated Acinetobacter baumannii UBA4598 genome recovered from SRX822221	-	UBA4598	metagenomic assembly	-	-	-	-	-	terrestrial metagenome	-	-	This BioSample is a metagenomic assembly obtained from the terrestrial metagenome reads: SRR1748838.	-	-	-	-	-	-	-	-	-	-
GCA_002364895.1	wood	Uncultivated Acinetobacter baumannii UBA3169 genome recovered from SRX822194	-	UBA3169	metagenomic assembly	-	-	-	-	-	terrestrial metagenome	-	-	This BioSample is a metagenomic assembly obtained from the terrestrial metagenome reads: SRR1748811.	-	-	-	-	-	-	-	-	-	-
GCA_002332605.1	metal	Uncultivated Acinetobacter baumannii UBA2057 genome recovered from SRX822397	-	UBA2057	metagenomic assembly	-	-	-	-	-	terrestrial metagenome	-	-	This BioSample is a metagenomic assembly obtained from the terrestrial metagenome reads: SRR1749014.	-	-	-	-	-	-	-	-	-	-
GCF_032940695.1	Chlorinated-WWTP	Microbe sample from Acinetobacter baumannii	-	Not collected	Whole Organism	-	-	-	-	-	-	-	-	-	-	-	-	-	-	-	-	-	-	-
GCF_032940585.1	Post-chlorinated-WWTP	Microbe sample from Acinetobacter baumannii	-	Not collected	Whole Organism	-	-	-	-	-	-	-	-	-	-	-	-	-	-	-	-	-	-	-
GCF_032940525.1	Post-chlorinated-WWTP	Microbe sample from Acinetobacter baumannii	-	Not collected	Whole Organism	-	-	-	-	-	-	-	-	-	-	-	-	-	-	-	-	-	-	-
GCF_032940515.1	Post-chlorinated-WWTP	Microbe sample from Acinetobacter baumannii	-	Not collected	Whole Organism	-	-	-	-	-	-	-	-	-	-	-	-	-	-	-	-	-	-	-
GCF_029674845.1	wastewater	Microbe sample from Acinetobacter baumannii	-	-	mixed culture	-	-	-	-	-	-	-	-	-	-	-	-	-	-	-	-	-	-	-
GCF_029674825.1	wastewater	Microbe sample from Acinetobacter baumannii	-	missing	mixed culture	-	-	-	-	-	-	-	-	-	-	-	-	-	-	-	-	-	-	-
GCF_029674805.1	wastewater	Microbe sample from Acinetobacter baumannii	-	missing	mixed culture	-	-	-	-	-	-	-	-	-	-	-	-	-	-	-	-	-	-	-
GCF_023094035.1	Sewage	Pathogen	-	-	-	-	-	-	-	-	-	-	-	-	-	-	-	-	-	-	-	-	-	-
GCF_014169655.1	-	Acinetobacter baumannii str. WP8-W18-ESBL-11	-	-	-	-	missing	wastewater treatment plant	wastewater	-	-	whole genome sequencing of Acinetobacter baumannii str. WP8-W18-ESBL-11	-	-	-	-	-	-	-	-	-	-	-	-
GCF_014159355.1	-	Acinetobacter baumannii str. WP4-W18-ESBL-11	-	-	-	-	missing	wastewater treatment plant	wastewater	-	-	whole genome sequencing of Acinetobacter baumannii str. WP4-W18-ESBL-11	-	-	-	-	-	-	-	-	-	-	-	-
GCF_002902885.1	-	Acinetobacter baumannii ABNIH28	-	-	-	-	wastewater/sludge	not collected	not collected	-	-	-	-	-	-	-	-	-	-	-	-	-	-	-
GCA_041906095.1	activated sludge [ENVO:00002046]	MIMAG Metagenome-assembled Genome sample from Acinetobacter baumannii	-	SZ_szas3bin.27	metagenomic assembly	-	sludge [ENVO:00002044]	activated sludge [ENVO:00002046]	-	-	activated sludge metagenome	-	-	-	-	-	-	-	-	-	-	-	-	-
GCA_031142425.1	wastewater	GenomeTrakr_Bacterial isolate from wastewater	-	-	-	-	-	-	-	-	-	GenomeTrakr; LFFM YR3	-	-	-	-	-	-	South Carolina Department of Health and Environmental Control	environmental	-	-	-	-
GCF_046134935.1	water	Pathogen	-	-	-	-	-	-	-	-	-	-	-	-	-	-	-	-	-	-	-	-	-	-
GCF_042863085.1	lake water	Microbe sample from Acinetobacter baumannii	-	-	lake water	-	-	-	-	-	-	-	-	-	-	-	-	-	-	-	-	-	-	-
GCF_042862965.1	lake water	Microbe sample from Acinetobacter baumannii	-	-	lake water	-	-	-	-	-	-	-	-	-	-	-	-	-	-	-	-	-	-	-
GCF_040239585.1	water	One Health Enteric sample from Acinetobacter baumannii	-	-	-	-	-	-	-	-	-	-	environmental assessment	-	-	-	-	-	-	environmental	-	-	-	-
GCF_040223815.1	water	One Health Enteric sample from Acinetobacter baumannii	-	-	-	-	-	-	-	-	-	-	environmental assessment	-	-	-	-	-	-	environmental	-	-	-	-
GCF_038432215.1	Surface water in a pond	Acinetobacter baumannii genome sequencing and assembly	-	-	-	-	-	-	-	-	-	-	-	-	-	-	-	-	-	-	-	-	-	-
GCF_032941065.1	Tankmilk	Microbe sample from Acinetobacter baumannii	-	Not collected	Whole Organism	-	-	-	-	-	-	-	-	-	-	-	-	-	-	-	-	-	-	-
GCF_032941005.1	Tankmilk	Microbe sample from Acinetobacter baumannii	-	Not collected	Whole Organism	-	-	-	-	-	-	-	-	-	-	-	-	-	-	-	-	-	-	-
GCF_032940475.1	Agricultural surface water	Microbe sample from Acinetobacter baumannii	-	Not collected	Whole Organism	-	-	-	-	-	-	-	-	-	-	-	-	-	-	-	-	-	-	-
GCF_032940395.1	Agricultural surface water	Microbe sample from Acinetobacter baumannii	-	Not collected	Whole Organism	-	-	-	-	-	-	-	-	-	-	-	-	-	-	-	-	-	-	-
GCF_032940335.1	Agricultural surface water	Microbe sample from Acinetobacter baumannii	-	Not collected	Whole Organism	-	-	-	-	-	-	-	-	-	-	-	-	-	-	-	-	-	-	-
GCF_032940305.1	Agricultural surface water	Microbe sample from Acinetobacter baumannii	-	Not collected	Whole Organism	-	-	-	-	-	-	-	-	-	-	-	-	-	-	-	-	-	-	-
GCF_032940275.1	Agricultural surface water	Microbe sample from Acinetobacter baumannii	-	Not collected	Whole Organism	-	-	-	-	-	-	-	-	-	-	-	-	-	-	-	-	-	-	-
GCF_032822615.1	lake	Microbe sample from Acinetobacter baumannii	-	missing	cell culture	-	-	-	-	-	-	-	-	-	-	-	-	-	-	-	-	-	-	-
GCF_031632215.1	Waste water	Pathogen	-	-	-	-	-	-	-	-	-	-	-	-	-	-	-	-	-	-	-	-	-	-
GCF_031158535.1	sewage water	Pathogen	-	-	-	-	-	-	-	-	-	-	-	-	-	-	-	-	-	-	-	-	-	-
GCF_031158295.1	sewage water	Pathogen	-	-	-	-	-	-	-	-	-	-	-	-	-	-	-	-	-	-	-	-	-	-
GCF_031158265.1	sewage water	Pathogen	-	-	-	-	-	-	-	-	-	-	-	-	-	-	-	-	-	-	-	-	-	-
GCF_031158195.1	sewage water	Pathogen	-	-	-	-	-	-	-	-	-	-	-	-	-	-	-	-	-	-	-	-	-	-
GCF_031158165.1	sewage water	Pathogen	-	-	-	-	-	-	-	-	-	-	-	-	-	-	-	-	-	-	-	-	-	-
GCF_031158115.1	sewage water	Pathogen	-	-	-	-	-	-	-	-	-	-	-	-	-	-	-	-	-	-	-	-	-	-
GCF_031158095.1	sewage water	Pathogen	-	-	-	-	-	-	-	-	-	-	-	-	-	-	-	-	-	-	-	-	-	-
GCF_031158065.1	sewage water	Pathogen	-	-	-	-	-	-	-	-	-	-	-	-	-	-	-	-	-	-	-	-	-	-
GCF_031158055.1	sewage water	Pathogen	-	-	-	-	-	-	-	-	-	-	-	-	-	-	-	-	-	-	-	-	-	-
GCF_031158015.1	sewage water	Pathogen	-	-	-	-	-	-	-	-	-	-	-	-	-	-	-	-	-	-	-	-	-	-
GCF_031157995.1	sewage water	Pathogen	-	-	-	-	-	-	-	-	-	-	-	-	-	-	-	-	-	-	-	-	-	-
GCF_031157935.1	sewage water	Pathogen	-	-	-	-	-	-	-	-	-	-	-	-	-	-	-	-	-	-	-	-	-	-
GCF_031157905.1	sewage water	Pathogen	-	-	-	-	-	-	-	-	-	-	-	-	-	-	-	-	-	-	-	-	-	-
GCF_031157855.1	sewage water	Pathogen	-	-	-	-	-	-	-	-	-	-	-	-	-	-	-	-	-	-	-	-	-	-
GCF_031157815.1	sewage water	Pathogen	-	-	-	-	-	-	-	-	-	-	-	-	-	-	-	-	-	-	-	-	-	-
GCF_031157795.1	sewage water	Pathogen	-	-	-	-	-	-	-	-	-	-	-	-	-	-	-	-	-	-	-	-	-	-
GCF_031157755.1	sewage water	Pathogen	-	-	-	-	-	-	-	-	-	-	-	-	-	-	-	-	-	-	-	-	-	-
GCF_031157735.1	sewage water	Pathogen	-	-	-	-	-	-	-	-	-	-	-	-	-	-	-	-	-	-	-	-	-	-
GCF_031157715.1	sewage water	Pathogen	-	-	-	-	-	-	-	-	-	-	-	-	-	-	-	-	-	-	-	-	-	-
GCF_031157675.1	sewage water	Pathogen	-	-	-	-	-	-	-	-	-	-	-	-	-	-	-	-	-	-	-	-	-	-
GCF_031157665.1	sewage water	Pathogen	-	-	-	-	-	-	-	-	-	-	-	-	-	-	-	-	-	-	-	-	-	-
GCF_031157635.1	sewage water	Pathogen	-	-	-	-	-	-	-	-	-	-	-	-	-	-	-	-	-	-	-	-	-	-
GCF_031157235.1	sewage water	Pathogen	-	-	-	-	-	-	-	-	-	-	-	-	-	-	-	-	-	-	-	-	-	-
GCF_031157215.1	sewage water	Pathogen	-	-	-	-	-	-	-	-	-	-	-	-	-	-	-	-	-	-	-	-	-	-
GCF_031157195.1	sewage water	Pathogen	-	-	-	-	-	-	-	-	-	-	-	-	-	-	-	-	-	-	-	-	-	-
GCF_031157155.1	sewage water	Pathogen	-	-	-	-	-	-	-	-	-	-	-	-	-	-	-	-	-	-	-	-	-	-
GCF_031157125.1	sewage water	Pathogen	-	-	-	-	-	-	-	-	-	-	-	-	-	-	-	-	-	-	-	-	-	-
GCF_031157115.1	sewage water	Pathogen	-	-	-	-	-	-	-	-	-	-	-	-	-	-	-	-	-	-	-	-	-	-
GCF_031156905.1	sewage water	Pathogen	-	-	-	-	-	-	-	-	-	-	-	-	-	-	-	-	-	-	-	-	-	-
GCF_031156895.1	sewage water	Pathogen	-	-	-	-	-	-	-	-	-	-	-	-	-	-	-	-	-	-	-	-	-	-
GCF_031156875.1	sewage water	Pathogen	-	-	-	-	-	-	-	-	-	-	-	-	-	-	-	-	-	-	-	-	-	-
GCF_031156835.1	sewage water	Pathogen	-	-	-	-	-	-	-	-	-	-	-	-	-	-	-	-	-	-	-	-	-	-
GCF_029478065.1	Water sample of Tiete River	Acinetobacter baumannii strain Ab120	-	-	-	-	-	-	-	-	-	-	-	-	-	-	-	-	-	-	-	-	-	-
GCF_026195215.1	Draining-Matting Conveyor	Illumina whole genome sequence reads of Acinetobacter baumannii	-	-	cell culture	-	-	-	-	-	-	-	-	-	-	-	-	-	-	-	-	-	-	-
GCF_026195175.1	Draining-Matting Conveyor	Illumina whole genome sequence reads of Acinetobacter baumannii	-	-	cell culture	-	-	-	-	-	-	-	-	-	-	-	-	-	-	-	-	-	-	-
GCF_026195165.1	Draining-Matting Conveyor	Illumina whole genome sequence reads of Acinetobacter baumannii	-	-	cell culture	-	-	-	-	-	-	-	-	-	-	-	-	-	-	-	-	-	-	-
GCF_026195155.1	Draining-Matting Conveyor	Illumina whole genome sequence reads of Acinetobacter baumannii	-	-	cell culture	-	-	-	-	-	-	-	-	-	-	-	-	-	-	-	-	-	-	-
GCF_026195135.1	Draining-Matting Conveyor	Illumina whole genome sequence reads of Acinetobacter baumannii	-	-	cell culture	-	-	-	-	-	-	-	-	-	-	-	-	-	-	-	-	-	-	-
GCF_026195085.1	Draining-Matting Conveyor	Illumina whole genome sequence reads of Acinetobacter baumannii	-	-	cell culture	-	-	-	-	-	-	-	-	-	-	-	-	-	-	-	-	-	-	-
GCF_026195045.1	Draining-Matting Conveyor	Illumina whole genome sequence reads of Acinetobacter baumannii	-	-	cell culture	-	-	-	-	-	-	-	-	-	-	-	-	-	-	-	-	-	-	-
GCF_026195035.1	Draining-Matting Conveyor	Illumina whole genome sequence reads of Acinetobacter baumannii	-	-	cell culture	-	-	-	-	-	-	-	-	-	-	-	-	-	-	-	-	-	-	-
GCF_026194995.1	Draining-Matting Conveyor	Illumina whole genome sequence reads of Acinetobacter baumannii	-	-	cell culture	-	-	-	-	-	-	-	-	-	-	-	-	-	-	-	-	-	-	-
GCF_026194895.1	Draining-Matting Conveyor	Illumina whole genome sequence reads of Acinetobacter baumannii	-	-	cell culture	-	-	-	-	-	-	-	-	-	-	-	-	-	-	-	-	-	-	-
GCF_026194825.1	Draining-Matting Conveyor	Illumina whole genome sequence reads of Acinetobacter baumannii	-	-	cell culture	-	-	-	-	-	-	-	-	-	-	-	-	-	-	-	-	-	-	-
GCF_026194815.1	Draining-Matting Conveyor	Illumina whole genome sequence reads of Acinetobacter baumannii	-	-	cell culture	-	-	-	-	-	-	-	-	-	-	-	-	-	-	-	-	-	-	-
GCF_026194805.1	Draining-Matting Conveyor	Illumina whole genome sequence reads of Acinetobacter baumannii	-	-	cell culture	-	-	-	-	-	-	-	-	-	-	-	-	-	-	-	-	-	-	-
GCF_026194795.1	Draining-Matting Conveyor	Illumina whole genome sequence reads of Acinetobacter baumannii	-	-	cell culture	-	-	-	-	-	-	-	-	-	-	-	-	-	-	-	-	-	-	-
GCF_026194685.1	Draining-Matting Conveyor	Illumina whole genome sequence reads of Acinetobacter baumannii	-	-	cell culture	-	-	-	-	-	-	-	-	-	-	-	-	-	-	-	-	-	-	-
GCF_026194675.1	Draining-Matting Conveyor	Illumina whole genome sequence reads of Acinetobacter baumannii	-	-	cell culture	-	-	-	-	-	-	-	-	-	-	-	-	-	-	-	-	-	-	-
GCF_026194565.1	Draining-Matting Conveyor	Illumina whole genome sequence reads of Acinetobacter baumannii	-	-	cell culture	-	-	-	-	-	-	-	-	-	-	-	-	-	-	-	-	-	-	-
GCF_026194555.1	Draining-Matting Conveyor	Illumina whole genome sequence reads of Acinetobacter baumannii	-	-	cell culture	-	-	-	-	-	-	-	-	-	-	-	-	-	-	-	-	-	-	-
GCF_026194465.1	Draining-Matting Conveyor	Illumina whole genome sequence reads of Acinetobacter baumannii	-	-	cell culture	-	-	-	-	-	-	-	-	-	-	-	-	-	-	-	-	-	-	-
GCF_026194385.1	Draining-Matting Conveyor	Illumina whole genome sequence reads of Acinetobacter baumannii	-	-	cell culture	-	-	-	-	-	-	-	-	-	-	-	-	-	-	-	-	-	-	-
GCF_026194245.1	Draining-Matting Conveyor	Illumina whole genome sequence reads of Acinetobacter baumannii	-	-	cell culture	-	-	-	-	-	-	-	-	-	-	-	-	-	-	-	-	-	-	-
GCF_026194145.1	Draining-Matting Conveyor	Illumina whole genome sequence reads of Acinetobacter baumannii	-	-	cell culture	-	-	-	-	-	-	-	-	-	-	-	-	-	-	-	-	-	-	-
GCF_026194115.1	Draining-Matting Conveyor	Illumina whole genome sequence reads of Acinetobacter baumannii	-	-	cell culture	-	-	-	-	-	-	-	-	-	-	-	-	-	-	-	-	-	-	-
GCF_026194095.1	Draining-Matting Conveyor	Illumina whole genome sequence reads of Acinetobacter baumannii	-	-	cell culture	-	-	-	-	-	-	-	-	-	-	-	-	-	-	-	-	-	-	-
GCF_026194075.1	Draining-Matting Conveyor	Illumina whole genome sequence reads of Acinetobacter baumannii	-	-	cell culture	-	-	-	-	-	-	-	-	-	-	-	-	-	-	-	-	-	-	-
GCF_026193955.1	Draining-Matting Conveyor	Illumina whole genome sequence reads of Acinetobacter baumannii	-	-	cell culture	-	-	-	-	-	-	-	-	-	-	-	-	-	-	-	-	-	-	-
GCF_026190685.1	Draining-Matting Conveyor	Illumina whole genome sequence reads of Acinetobacter baumannii	-	-	cell culture	-	-	-	-	-	-	-	-	-	-	-	-	-	-	-	-	-	-	-
GCF_026190675.1	Draining-Matting Conveyor	Illumina whole genome sequence reads of Acinetobacter baumannii	-	-	cell culture	-	-	-	-	-	-	-	-	-	-	-	-	-	-	-	-	-	-	-
GCF_026190635.1	Draining-Matting Conveyor	Illumina whole genome sequence reads of Acinetobacter baumannii	-	-	cell culture	-	-	-	-	-	-	-	-	-	-	-	-	-	-	-	-	-	-	-
GCF_026190615.1	Draining-Matting Conveyor	Illumina whole genome sequence reads of Acinetobacter baumannii	-	-	cell culture	-	-	-	-	-	-	-	-	-	-	-	-	-	-	-	-	-	-	-
GCF_026190595.1	Draining-Matting Conveyor	Illumina whole genome sequence reads of Acinetobacter baumannii	-	-	cell culture	-	-	-	-	-	-	-	-	-	-	-	-	-	-	-	-	-	-	-
GCF_026190575.1	Draining-Matting Conveyor	Illumina whole genome sequence reads of Acinetobacter baumannii	-	-	cell culture	-	-	-	-	-	-	-	-	-	-	-	-	-	-	-	-	-	-	-
GCF_026190555.1	Draining-Matting Conveyor	Illumina whole genome sequence reads of Acinetobacter baumannii	-	-	cell culture	-	-	-	-	-	-	-	-	-	-	-	-	-	-	-	-	-	-	-
GCF_026190535.1	Draining-Matting Conveyor	Illumina whole genome sequence reads of Acinetobacter baumannii	-	-	cell culture	-	-	-	-	-	-	-	-	-	-	-	-	-	-	-	-	-	-	-
GCF_026190515.1	Draining-Matting Conveyor	Illumina whole genome sequence reads of Acinetobacter baumannii	-	-	cell culture	-	-	-	-	-	-	-	-	-	-	-	-	-	-	-	-	-	-	-
GCF_026190495.1	Draining-Matting Conveyor	Illumina whole genome sequence reads of Acinetobacter baumannii	-	-	cell culture	-	-	-	-	-	-	-	-	-	-	-	-	-	-	-	-	-	-	-
GCF_026190445.1	Draining-Matting Conveyor	Illumina whole genome sequence reads of Acinetobacter baumannii	-	-	cell culture	-	-	-	-	-	-	-	-	-	-	-	-	-	-	-	-	-	-	-
GCF_026190435.1	Draining-Matting Conveyor	Illumina whole genome sequence reads of Acinetobacter baumannii	-	-	cell culture	-	-	-	-	-	-	-	-	-	-	-	-	-	-	-	-	-	-	-
GCF_026190425.1	Draining-Matting Conveyor	Illumina whole genome sequence reads of Acinetobacter baumannii	-	-	cell culture	-	-	-	-	-	-	-	-	-	-	-	-	-	-	-	-	-	-	-
GCF_026190415.1	Draining-Matting Conveyor	Illumina whole genome sequence reads of Acinetobacter baumannii	-	-	cell culture	-	-	-	-	-	-	-	-	-	-	-	-	-	-	-	-	-	-	-
GCF_026190395.1	Draining-Matting Conveyor	Illumina whole genome sequence reads of Acinetobacter baumannii	-	-	cell culture	-	-	-	-	-	-	-	-	-	-	-	-	-	-	-	-	-	-	-
GCF_026190325.1	Draining-Matting Conveyor	Illumina whole genome sequence reads of Acinetobacter baumannii	-	-	cell culture	-	-	-	-	-	-	-	-	-	-	-	-	-	-	-	-	-	-	-
GCF_026190315.1	Draining-Matting Conveyor	Illumina whole genome sequence reads of Acinetobacter baumannii	-	-	cell culture	-	-	-	-	-	-	-	-	-	-	-	-	-	-	-	-	-	-	-
GCF_026190255.1	Draining-Matting Conveyor	Illumina whole genome sequence reads of Acinetobacter baumannii	-	-	cell culture	-	-	-	-	-	-	-	-	-	-	-	-	-	-	-	-	-	-	-
GCF_026190135.1	Draining-Matting Conveyor	Illumina whole genome sequence reads of Acinetobacter baumannii	-	-	cell culture	-	-	-	-	-	-	-	-	-	-	-	-	-	-	-	-	-	-	-
GCF_026190115.1	Draining-Matting Conveyor	Illumina whole genome sequence reads of Acinetobacter baumannii	-	-	cell culture	-	-	-	-	-	-	-	-	-	-	-	-	-	-	-	-	-	-	-
GCF_026190095.1	Draining-Matting Conveyor	Illumina whole genome sequence reads of Acinetobacter baumannii	-	-	cell culture	-	-	-	-	-	-	-	-	-	-	-	-	-	-	-	-	-	-	-
GCF_026189975.1	Draining-Matting Conveyor	Illumina whole genome sequence reads of Acinetobacter baumannii	-	-	cell culture	-	-	-	-	-	-	-	-	-	-	-	-	-	-	-	-	-	-	-
GCF_026189965.1	Draining-Matting Conveyor	Illumina whole genome sequence reads of Acinetobacter baumannii	-	-	cell culture	-	-	-	-	-	-	-	-	-	-	-	-	-	-	-	-	-	-	-
GCF_026189815.1	Draining-Matting Conveyor	Illumina whole genome sequence reads of Acinetobacter baumannii	-	-	cell culture	-	-	-	-	-	-	-	-	-	-	-	-	-	-	-	-	-	-	-
GCF_026189665.1	Draining-Matting Conveyor	Illumina whole genome sequence reads of Acinetobacter baumannii	-	-	cell culture	-	-	-	-	-	-	-	-	-	-	-	-	-	-	-	-	-	-	-
GCF_026189655.1	Draining-Matting Conveyor	Illumina whole genome sequence reads of Acinetobacter baumannii	-	-	cell culture	-	-	-	-	-	-	-	-	-	-	-	-	-	-	-	-	-	-	-
GCF_026189635.1	Draining-Matting Conveyor	Illumina whole genome sequence reads of Acinetobacter baumannii	-	-	cell culture	-	-	-	-	-	-	-	-	-	-	-	-	-	-	-	-	-	-	-
GCF_026189595.1	Draining-Matting Conveyor	Illumina whole genome sequence reads of Acinetobacter baumannii	-	-	cell culture	-	-	-	-	-	-	-	-	-	-	-	-	-	-	-	-	-	-	-
GCF_025515635.1	Ozama River	Pathogen	-	-	-	-	-	-	-	-	-	-	-	-	-	-	-	-	-	-	-	-	-	-
GCF_025457465.1	wastewater	Microbe sample from Acinetobacter baumannii	-	-	water	-	-	-	-	-	-	-	-	-	-	-	-	-	-	-	-	-	-	-
GCF_025457435.1	wastewater	Microbe sample from Acinetobacter baumannii	-	-	water	-	-	-	-	-	-	-	-	-	-	-	-	-	-	-	-	-	-	-
GCF_025457365.1	wastewater	Microbe sample from Acinetobacter baumannii	-	-	water	-	-	-	-	-	-	-	-	-	-	-	-	-	-	-	-	-	-	-
GCF_025457335.1	wastewater	Microbe sample from Acinetobacter baumannii	-	-	water	-	-	-	-	-	-	-	-	-	-	-	-	-	-	-	-	-	-	-
GCF_025457295.1	wastewater	Microbe sample from Acinetobacter baumannii	-	-	water	-	-	-	-	-	-	-	-	-	-	-	-	-	-	-	-	-	-	-
GCF_025457245.1	wastewater	Microbe sample from Acinetobacter baumannii	-	-	water	-	-	-	-	-	-	-	-	-	-	-	-	-	-	-	-	-	-	-
GCF_025457215.1	wastewater	Microbe sample from Acinetobacter baumannii	-	-	water	-	-	-	-	-	-	-	-	-	-	-	-	-	-	-	-	-	-	-
GCF_025457205.1	wastewater	Microbe sample from Acinetobacter baumannii	-	-	water	-	-	-	-	-	-	-	-	-	-	-	-	-	-	-	-	-	-	-
GCF_025457145.1	wastewater	Microbe sample from Acinetobacter baumannii	-	-	water	-	-	-	-	-	-	-	-	-	-	-	-	-	-	-	-	-	-	-
GCF_025457115.1	wastewater	Microbe sample from Acinetobacter baumannii	-	-	water	-	-	-	-	-	-	-	-	-	-	-	-	-	-	-	-	-	-	-
GCF_025457105.1	wastewater	Microbe sample from Acinetobacter baumannii	-	-	water	-	-	-	-	-	-	-	-	-	-	-	-	-	-	-	-	-	-	-
GCF_025457085.1	wastewater	Microbe sample from Acinetobacter baumannii	-	-	water	-	-	-	-	-	-	-	-	-	-	-	-	-	-	-	-	-	-	-
GCF_025457015.1	wastewater	Microbe sample from Acinetobacter baumannii	-	-	water	-	-	-	-	-	-	-	-	-	-	-	-	-	-	-	-	-	-	-
GCF_025457005.1	wastewater	Microbe sample from Acinetobacter baumannii	-	-	water	-	-	-	-	-	-	-	-	-	-	-	-	-	-	-	-	-	-	-
GCF_025456985.1	wastewater	Microbe sample from Acinetobacter baumannii	-	-	water	-	-	-	-	-	-	-	-	-	-	-	-	-	-	-	-	-	-	-
GCF_025456945.1	wastewater	Microbe sample from Acinetobacter baumannii	-	-	water	-	-	-	-	-	-	-	-	-	-	-	-	-	-	-	-	-	-	-
GCF_025456925.1	wastewater	Microbe sample from Acinetobacter baumannii	-	-	water	-	-	-	-	-	-	-	-	-	-	-	-	-	-	-	-	-	-	-
GCF_025456905.1	wastewater	Microbe sample from Acinetobacter baumannii	-	-	water	-	-	-	-	-	-	-	-	-	-	-	-	-	-	-	-	-	-	-
GCF_025456885.1	wastewater	Microbe sample from Acinetobacter baumannii	-	-	water	-	-	-	-	-	-	-	-	-	-	-	-	-	-	-	-	-	-	-
GCF_025456855.1	wastewater	Microbe sample from Acinetobacter baumannii	-	-	water	-	-	-	-	-	-	-	-	-	-	-	-	-	-	-	-	-	-	-
GCF_025456825.1	wastewater	Microbe sample from Acinetobacter baumannii	-	-	water	-	-	-	-	-	-	-	-	-	-	-	-	-	-	-	-	-	-	-
GCF_025456815.1	wastewater	Microbe sample from Acinetobacter baumannii	-	-	water	-	-	-	-	-	-	-	-	-	-	-	-	-	-	-	-	-	-	-
GCF_025456805.1	wastewater	Microbe sample from Acinetobacter baumannii	-	-	water	-	-	-	-	-	-	-	-	-	-	-	-	-	-	-	-	-	-	-
GCF_025245665.1	waste water	Pathogen	-	-	-	-	waste water	sullage	odourous water	-	-	-	-	-	-	-	-	-	-	-	-	-	-	-
GCF_025245645.1	waste water	Pathogen	-	-	-	-	waste water	sullage	odourous water	-	-	-	-	-	-	-	-	-	-	-	-	-	-	-
GCF_019903215.1	Seine River	Pathogen	-	-	-	-	-	-	-	-	-	-	-	-	-	-	-	-	-	-	-	-	-	-
GCF_018831485.1	Water (artesian well)	Pathogen	-	-	-	-	-	-	-	-	-	-	-	-	-	-	-	-	-	-	-	-	-	-
GCF_017939285.1	environment	Microbe sample from Acinetobacter baumannii	-	-	whole organism	-	-	-	-	-	-	-	-	-	-	-	-	-	-	-	-	-	-	-
GCF_017897205.1	Ozama River	Pathogen	-	-	-	-	-	-	-	-	-	-	-	-	-	-	-	-	-	-	-	-	-	-
GCF_014858105.1	Isabela River	Pathogen	-	-	-	-	-	-	-	-	-	-	-	-	-	-	-	-	-	-	-	-	-	-
GCF_014858045.1	Isabela River	Pathogen	-	-	-	-	-	-	-	-	-	-	-	-	-	-	-	-	-	-	-	-	-	-
GCF_014712715.1	Isabela River	Pathogen	-	-	-	-	-	-	-	-	-	-	-	-	-	-	-	-	-	-	-	-	-	-
GCF_014705645.1	Isabela River	Pathogen	-	-	-	-	-	-	-	-	-	-	-	-	-	-	-	-	-	-	-	-	-	-
GCF_014323505.1	missing	Pathogen	-	-	-	-	-	-	-	-	-	-	-	-	-	-	-	-	-	-	-	-	-	-
GCF_005298085.1	water	Pathogen	-	-	-	-	-	-	-	-	-	-	-	-	-	-	-	-	-	-	-	-	-	-
GCF_005298065.1	water	Pathogen	-	-	-	-	-	-	-	-	-	-	-	-	-	-	-	-	-	-	-	-	-	-
GCA_042928675.1	Enviromental	Microbe sample from Acinetobacter baumannii	-	Ab 19060 ENE2	Surface waters Downstream	-	-	-	-	-	-	-	-	-	-	-	-	-	-	-	-	-	-	-
GCA_042927865.1	Enviromental	Microbe sample from Acinetobacter baumannii	-	20067 CNE5	Waste waters Influent	-	-	-	-	-	-	-	-	-	-	-	-	-	-	-	-	-	-	-
GCA_042927095.1	Enviromental	Microbe sample from Acinetobacter baumannii	-	20070 CNE2	Surface waters Downstream	-	-	-	-	-	-	-	-	-	-	-	-	-	-	-	-	-	-	-
GCA_042925765.1	Enviromental	Microbe sample from Acinetobacter baumannii	-	19014 ENE4	Waste waters Active sludge	-	-	-	-	-	-	-	-	-	-	-	-	-	-	-	-	-	-	-
GCA_042925745.1	Enviromental	Microbe sample from Acinetobacter baumannii	-	19015 CNE6	Waste waters Effluent	-	-	-	-	-	-	-	-	-	-	-	-	-	-	-	-	-	-	-
GCA_032940555.1	Post-chlorinated-WWTP	Microbe sample from Acinetobacter baumannii	-	Not collected	Whole Organism	-	-	-	-	-	-	-	-	-	-	-	-	-	-	-	-	-	-	-
GCA_032940085.1	Chlorinated-WWTP	Microbe sample from Acinetobacter baumannii	-	Not collected	Whole Organism	-	-	-	-	-	-	-	-	-	-	-	-	-	-	-	-	-	-	-
GCA_028443725.1	river Holtemme	Microbe sample from Acinetobacter baumannii	-	-	cell culture	-	-	-	-	-	-	-	-	-	-	-	-	-	-	-	-	-	-	-
GCA_001516805.1	River Bhagirathi	Microbe sample from Acinetobacter baumannii	-	-	whole organism	-	-	-	-	-	-	-	-	-	-	-	-	-	-	-	-	-	-	-
GCA_045170355.1	Coconut meat [FOODON:00003856]; Ready-to-eat (RTE) [FOODON:03316636]; Food (chunks) [FOODON:00004555]; Food (frozen) [FOODON:03302148]; Retail environment [ENVO:01001448]	One Health Enteric sample from Acinetobacter baumannii	-	-	-	-	-	-	-	-	-	WP4.2_ Frozen stone fruit	Survey study [GENEPIO:0100582]	-	Food (chunks) [FOODON:00004555]	Coconut meat [FOODON:00003856]; Ready-to-eat (RTE) [FOODON:03316636]	Coconut (whole or parts) [FOODON:03309861]	-	Canadian Food Inspection Agency (CFIA) [GENEPIO:0100552]	food	-	Plastic bag, sack or pouch [FOODON:03490166]	Food (frozen) [FOODON:03302148]	-
GCA_045170345.1	Coconut meat [FOODON:00003856]; Ready-to-eat (RTE) [FOODON:03316636]; Food (chunks) [FOODON:00004555]; Food (frozen) [FOODON:03302148]; Retail environment [ENVO:01001448]	One Health Enteric sample from Acinetobacter baumannii	-	-	-	-	-	-	-	-	-	WP4.2_ Frozen stone fruit	Survey study [GENEPIO:0100582]	-	Food (shredded) [FOODON:00004553]	Coconut meat [FOODON:00003856]; Ready-to-eat (RTE) [FOODON:03316636]	Coconut (whole or parts) [FOODON:03309861]	-	Canadian Food Inspection Agency (CFIA) [GENEPIO:0100552]	food	-	Plastic bag, sack or pouch [FOODON:03490166]	Food (frozen) [FOODON:03302148]	-
GCA_045170325.1	Coconut meat [FOODON:00003856]; Ready-to-eat (RTE) [FOODON:03316636]; Food (chunks) [FOODON:00004555]; Food (frozen) [FOODON:03302148]; Retail environment [ENVO:01001448]	One Health Enteric sample from Acinetobacter baumannii	-	-	-	-	-	-	-	-	-	WP4.2_ Frozen stone fruit	Survey study [GENEPIO:0100582]	-	Food (shredded) [FOODON:00004553]	Coconut meat [FOODON:00003856]; Ready-to-eat (RTE) [FOODON:03316636]	Coconut (whole or parts) [FOODON:03309861]	-	Canadian Food Inspection Agency (CFIA) [GENEPIO:0100552]	food	-	Plastic bag, sack or pouch [FOODON:03490166]	Food (frozen) [FOODON:03302148]	-
GCA_045170265.1	Coconut meat [FOODON:00003856]; Ready-to-eat (RTE) [FOODON:03316636]; Food (chunks) [FOODON:00004555]; Food (frozen) [FOODON:03302148]; Retail environment [ENVO:01001448]	One Health Enteric sample from Acinetobacter baumannii	-	-	-	-	-	-	-	-	-	WP4.2_ Frozen stone fruit	Survey study [GENEPIO:0100582]	-	Food (shredded) [FOODON:00004553]	Coconut meat [FOODON:00003856]; Ready-to-eat (RTE) [FOODON:03316636]	Coconut (whole or parts) [FOODON:03309861]	-	Canadian Food Inspection Agency (CFIA) [GENEPIO:0100552]	food	-	Plastic bag, sack or pouch [FOODON:03490166]	Food (frozen) [FOODON:03302148]	-
GCA_045170245.1	Peach [FOODON:00002485]; Ready-to-eat (RTE) [FOODON:03316636]; Food (sliced) [FOODON:00002455]; Food (frozen) [FOODON:03302148]; Retail environment [ENVO:01001448]	One Health Enteric sample from Acinetobacter baumannii	-	-	-	-	-	-	-	-	-	WP4.2_ Frozen stone fruit	Survey study [GENEPIO:0100582]	-	Food (sliced) [FOODON:00002455]	Peach [FOODON:00002485]; Ready-to-eat (RTE) [FOODON:03316636]	Peach [FOODON:00002485]	-	Canadian Food Inspection Agency (CFIA) [GENEPIO:0100552]	food	-	Plastic bag, sack or pouch [FOODON:03490166]	Food (frozen) [FOODON:03302148]	-
GCA_045170195.1	Coconut meat [FOODON:00003856]; Ready-to-eat (RTE) [FOODON:03316636]; Food (chunks) [FOODON:00004555]; Food (frozen) [FOODON:03302148]; Retail environment [ENVO:01001448]	One Health Enteric sample from Acinetobacter baumannii	-	-	-	-	-	-	-	-	-	WP4.2_ Frozen stone fruit	Survey study [GENEPIO:0100582]	-	Food (chunks) [FOODON:00004555]	Coconut meat [FOODON:00003856]; Ready-to-eat (RTE) [FOODON:03316636]	Coconut (whole or parts) [FOODON:03309861]	-	Canadian Food Inspection Agency (CFIA) [GENEPIO:0100552]	food	-	Plastic bag, sack or pouch [FOODON:03490166]	Food (frozen) [FOODON:03302148]	-
GCA_045170185.1	Peach [FOODON:00002485]; Ready-to-eat (RTE) [FOODON:03316636]; Food (sliced) [FOODON:00002455]; Food (frozen) [FOODON:03302148]; Retail environment [ENVO:01001448]	One Health Enteric sample from Acinetobacter baumannii	-	-	-	-	-	-	-	-	-	WP4.2_ Frozen stone fruit	Survey study [GENEPIO:0100582]	-	Food (sliced) [FOODON:00002455]	Peach [FOODON:00002485]; Ready-to-eat (RTE) [FOODON:03316636]	Peach [FOODON:00002485]	-	Canadian Food Inspection Agency (CFIA) [GENEPIO:0100552]	food	-	Plastic bag, sack or pouch [FOODON:03490166]	Food (frozen) [FOODON:03302148]	-
GCA_045170165.1	Peach [FOODON:00002485]; Ready-to-eat (RTE) [FOODON:03316636]; Food (sliced) [FOODON:00002455]; Food (frozen) [FOODON:03302148]; Retail environment [ENVO:01001448]	One Health Enteric sample from Acinetobacter baumannii	-	-	-	-	-	-	-	-	-	WP4.2_ Frozen stone fruit	Survey study [GENEPIO:0100582]	-	Food (sliced) [FOODON:00002455]	Peach [FOODON:00002485]; Ready-to-eat (RTE) [FOODON:03316636]	Peach [FOODON:00002485]	-	Canadian Food Inspection Agency (CFIA) [GENEPIO:0100552]	food	-	Plastic bag, sack or pouch [FOODON:03490166]	Food (frozen) [FOODON:03302148]	-
GCA_045170105.1	Peach [FOODON:00002485]; Ready-to-eat (RTE) [FOODON:03316636]; Food (sliced) [FOODON:00002455]; Food (frozen) [FOODON:03302148]; Retail environment [ENVO:01001448]	One Health Enteric sample from Acinetobacter baumannii	-	-	-	-	-	-	-	-	-	WP4.2_ Frozen stone fruit	Survey study [GENEPIO:0100582]	-	Food (sliced) [FOODON:00002455]	Peach [FOODON:00002485]; Ready-to-eat (RTE) [FOODON:03316636]	Peach [FOODON:00002485]	-	Canadian Food Inspection Agency (CFIA) [GENEPIO:0100552]	food	-	Plastic bag, sack or pouch [FOODON:03490166]	Food (frozen) [FOODON:03302148]	-
GCA_045170025.1	Coconut meat [FOODON:00003856]; Ready-to-eat (RTE) [FOODON:03316636]; Food (chunks) [FOODON:00004555]; Food (frozen) [FOODON:03302148]; Retail environment [ENVO:01001448]	One Health Enteric sample from Acinetobacter baumannii	-	-	-	-	-	-	-	-	-	WP4.2_ Frozen stone fruit	Survey study [GENEPIO:0100582]	-	Food (chunks) [FOODON:00004555]	Coconut meat [FOODON:00003856]; Ready-to-eat (RTE) [FOODON:03316636]	Coconut (whole or parts) [FOODON:03309861]	-	Canadian Food Inspection Agency (CFIA) [GENEPIO:0100552]	food	-	Plastic bag, sack or pouch [FOODON:03490166]	Food (frozen) [FOODON:03302148]	-
GCF_041930545.1	rhizosphere soil	Microbe sample from Acinetobacter baumannii	-	-	Single cell	-	-	-	-	-	-	-	-	-	-	-	-	-	-	-	-	-	-	-
GCF_033612615.1	missing	Microbe sample from Acinetobacter baumannii	Plant	-	cell culture	-	-	-	-	-	-	-	-	-	-	-	-	-	-	-	-	-	-	-
GCF_009740145.1	cucumber rhizosphere	Microbe sample from Acinetobacter baumannii XL380	-	-	cell culture	-	-	-	-	-	-	-	-	-	-	-	-	-	-	-	-	-	-	-
GCF_004194555.1	aerobic microbial decomposition of whole and defoliated guayule (retting)	Microbe sample from Acinetobacter baumannii	Parthenium argentatum Gray (guayule shrubs)	-	bacterial cell culture	-	-	-	-	-	-	-	-	-	-	-	-	-	-	-	-	-	-	-
GCF_002727055.2	inner root	Genome of Acinetobacter baumannii strain I43, a mercury resistant bacteria	Aeschynomene fluminensis	-	tissue sample	-	Pantanal	-	-	Inner root	-	-	-	-	-	-	-	-	-	-	-	-	-	-
GCA_028447565.1	plant root	Microbe sample from Acinetobacter baumannii	Urtica dioica	-	cell culture	-	-	-	-	-	-	-	-	-	-	-	-	-	-	-	-	-	-	-
GCA_028447545.1	plant root	Microbe sample from Acinetobacter baumannii	Urtica dioica	-	cell culture	-	-	-	-	-	-	-	-	-	-	-	-	-	-	-	-	-	-	-
GCA_028443535.1	plant root	Microbe sample from Acinetobacter baumannii	Plant	-	cell culture	-	-	-	-	-	-	-	-	-	-	-	-	-	-	-	-	-	-	-
GCA_028443525.1	plant root	Microbe sample from Acinetobacter baumannii	Plant	-	cell culture	-	-	-	-	-	-	-	-	-	-	-	-	-	-	-	-	-	-	-
GCA_028443485.1	plant root	Microbe sample from Acinetobacter baumannii	Plant	-	cell culture	-	-	-	-	-	-	-	-	-	-	-	-	-	-	-	-	-	-	-
GCA_028442505.1	root on compost	Microbe sample from Acinetobacter baumannii	Epilobium	-	cell culture	-	-	-	-	-	-	-	-	-	-	-	-	-	-	-	-	-	-	-
GCA_028441975.1	plant root	Microbe sample from Acinetobacter baumannii	-	-	cell culture	-	-	-	-	-	-	-	-	-	-	-	-	-	-	-	-	-	-	-
GCA_028438175.1	plant root	Microbe sample from Acinetobacter baumannii	-	-	cell culture	-	-	-	-	-	-	-	-	-	-	-	-	-	-	-	-	-	-	-
GCA_028438105.1	plant root	Microbe sample from Acinetobacter baumannii	-	-	cell culture	-	-	-	-	-	-	-	-	-	-	-	-	-	-	-	-	-	-	-
GCA_017193455.1	-	AO22	Acinetobacter baumannii	-	-	-	not applicable	organic feature	organic baby leaf mix	-	-	Genome sequencing of antibiotic resistant bacteria from vegetables	-	-	-	-	-	-	-	-	-	-	-	-
GCF_020985285.1	Andrias davidianus	Pathogen	-	-	-	-	-	-	-	-	-	-	-	-	-	-	-	-	-	-	-	-	-	-
GCF_008000275.1	Environment	Pathogen	-	-	-	-	-	-	-	-	-	-	-	-	-	-	-	-	-	-	-	-	-	-
GCF_007113875.1	Environment	Pathogen	none	-	-	none	-	-	-	-	-	-	-	-	-	-	-	-	-	-	-	-	-	-
GCF_017753625.1	missing	Acinetobacter baumannii strain DETAB-E227, complete sequence	-	-	environment swab	-	-	-	-	-	-	-	-	-	-	-	-	-	-	-	-	-	-	-
GCF_030188795.1	environment	The Microbe sample of Acinetobacter baumannii strain 090705	-	-	pure culture	-	-	-	-	-	-	-	-	-	-	-	-	-	-	-	-	-	-	-
GCF_030188775.1	environment	The Microbe sample of Acinetobacter baumannii strain 090698	-	-	pure culture	-	-	-	-	-	-	-	-	-	-	-	-	-	-	-	-	-	-	-
GCF_030188735.1	environment	The Microbe sample of Acinetobacter baumannii strain 090700	-	-	pure culture	-	-	-	-	-	-	-	-	-	-	-	-	-	-	-	-	-	-	-
GCF_030188635.1	environment	The Microbe sample of Acinetobacter baumannii strain 090699	-	-	pure culture	-	-	-	-	-	-	-	-	-	-	-	-	-	-	-	-	-	-	-
GCF_030188565.1	environment	The Microbe sample of Acinetobacter baumannii strain 090690	-	-	pure culture	-	-	-	-	-	-	-	-	-	-	-	-	-	-	-	-	-	-	-
GCF_030188555.1	environment	The Microbe sample of Acinetobacter baumannii strain 090694	-	-	pure culture	-	-	-	-	-	-	-	-	-	-	-	-	-	-	-	-	-	-	-
GCF_030188535.1	environment	The Microbe sample of Acinetobacter baumannii strain 090695	-	-	pure culture	-	-	-	-	-	-	-	-	-	-	-	-	-	-	-	-	-	-	-
GCF_030188515.1	environment	The Microbe sample of Acinetobacter baumannii strain 090685	-	-	pure culture	-	-	-	-	-	-	-	-	-	-	-	-	-	-	-	-	-	-	-
GCF_030188495.1	environment	The Microbe sample of Acinetobacter baumannii strain 090686	-	-	pure culture	-	-	-	-	-	-	-	-	-	-	-	-	-	-	-	-	-	-	-
GCF_030188475.1	environment	The Microbe sample of Acinetobacter baumannii strain 090701	-	-	pure culture	-	-	-	-	-	-	-	-	-	-	-	-	-	-	-	-	-	-	-
GCF_030188455.1	environment	The Microbe sample of Acinetobacter baumannii strain 090697	-	-	pure culture	-	-	-	-	-	-	-	-	-	-	-	-	-	-	-	-	-	-	-
GCF_030188435.1	environment	The Microbe sample of Acinetobacter baumannii strain 090693	-	-	pure culture	-	-	-	-	-	-	-	-	-	-	-	-	-	-	-	-	-	-	-
GCF_030188415.1	environment	The Microbe sample of Acinetobacter baumannii strain 090696	-	-	pure culture	-	-	-	-	-	-	-	-	-	-	-	-	-	-	-	-	-	-	-
GCF_030188385.1	environment	The Microbe sample of Acinetobacter baumannii strain 090688	-	-	pure culture	-	-	-	-	-	-	-	-	-	-	-	-	-	-	-	-	-	-	-
GCF_030188365.1	environment	The Microbe sample of Acinetobacter baumannii strain 090703	-	-	pure culture	-	-	-	-	-	-	-	-	-	-	-	-	-	-	-	-	-	-	-
GCF_030188355.1	environment	The Microbe sample of Acinetobacter baumannii strain 090704	-	-	pure culture	-	-	-	-	-	-	-	-	-	-	-	-	-	-	-	-	-	-	-
GCF_026194635.2	Draining-Matting Conveyor	Illumina whole genome sequence reads of Acinetobacter baumannii	-	-	cell culture	-	-	-	-	-	-	-	-	-	-	-	-	-	-	-	-	-	-	-
GCF_025854255.1	ENVIRONMENT	Pathogen	-	missing	-	-	-	-	-	-	-	-	-	-	-	-	-	-	-	-	-	-	-	-
GCF_025854235.1	ENVIRONMENT	Pathogen	-	missing	-	-	-	-	-	-	-	-	-	-	-	-	-	-	-	-	-	-	-	-
GCF_025854215.1	ENVIRONMENT	Pathogen	-	missing	-	-	-	-	-	-	-	-	-	-	-	-	-	-	-	-	-	-	-	-
GCF_025854195.1	ENVIRONMENT	Pathogen	-	missing	-	-	-	-	-	-	-	-	-	-	-	-	-	-	-	-	-	-	-	-
GCF_025854175.1	ENVIRONMENT	Pathogen	-	missing	-	-	-	-	-	-	-	-	-	-	-	-	-	-	-	-	-	-	-	-
GCF_025854155.1	ENVIRONMENT	Pathogen	-	missing	-	-	-	-	-	-	-	-	-	-	-	-	-	-	-	-	-	-	-	-
GCF_022466815.1	Plant microbiota	Microbe sample from Acinetobacter baumannii	-	-	cell culture	-	-	-	-	-	-	-	-	-	-	-	-	-	-	-	-	-	-	-
GCF_045791805.1	food	Microbe sample from Acinetobacter baumannii	-	not applicable	bacterial sample	-	-	-	-	-	-	-	-	-	-	-	-	-	-	-	-	-	-	-
GCF_045791715.1	food	Microbe sample from Acinetobacter baumannii	-	not applicable	bacterial sample	-	-	-	-	-	-	-	-	-	-	-	-	-	-	-	-	-	-	-
GCF_045791705.1	food	Microbe sample from Acinetobacter baumannii	-	not applicable	bacterial sample	-	-	-	-	-	-	-	-	-	-	-	-	-	-	-	-	-	-	-
GCF_045791735.1	food	Microbe sample from Acinetobacter baumannii	-	not applicable	bacterial sample	-	-	-	-	-	-	-	-	-	-	-	-	-	-	-	-	-	-	-
GCF_045791665.1	food	Microbe sample from Acinetobacter baumannii	-	not applicable	bacterial sample	-	-	-	-	-	-	-	-	-	-	-	-	-	-	-	-	-	-	-
GCF_045791605.1	food	Microbe sample from Acinetobacter baumannii	-	not applicable	bacterial sample	-	-	-	-	-	-	-	-	-	-	-	-	-	-	-	-	-	-	-
GCF_045791585.1	food	Microbe sample from Acinetobacter baumannii	-	not applicable	bacterial sample	-	-	-	-	-	-	-	-	-	-	-	-	-	-	-	-	-	-	-
GCF_045791615.1	food	Microbe sample from Acinetobacter baumannii	-	not applicable	bacterial sample	-	-	-	-	-	-	-	-	-	-	-	-	-	-	-	-	-	-	-
GCF_045791555.1	food	Microbe sample from Acinetobacter baumannii	-	not applicable	bacterial sample	-	-	-	-	-	-	-	-	-	-	-	-	-	-	-	-	-	-	-
GCF_045791525.1	food	Microbe sample from Acinetobacter baumannii	-	not applicable	bacterial sample	-	-	-	-	-	-	-	-	-	-	-	-	-	-	-	-	-	-	-
GCF_045791505.1	food	Microbe sample from Acinetobacter baumannii	-	not applicable	bacterial sample	-	-	-	-	-	-	-	-	-	-	-	-	-	-	-	-	-	-	-
GCF_045791495.1	food	Microbe sample from Acinetobacter baumannii	-	not applicable	bacterial sample	-	-	-	-	-	-	-	-	-	-	-	-	-	-	-	-	-	-	-
GCF_045791475.1	food	Microbe sample from Acinetobacter baumannii	-	not applicable	bacterial sample	-	-	-	-	-	-	-	-	-	-	-	-	-	-	-	-	-	-	-
GCF_045791455.1	food	Microbe sample from Acinetobacter baumannii	-	not applicable	bacterial sample	-	-	-	-	-	-	-	-	-	-	-	-	-	-	-	-	-	-	-
GCF_045791405.1	food	Microbe sample from Acinetobacter baumannii	-	not applicable	bacterial sample	-	-	-	-	-	-	-	-	-	-	-	-	-	-	-	-	-	-	-
GCF_045791425.1	food	Microbe sample from Acinetobacter baumannii	-	not applicable	bacterial sample	-	-	-	-	-	-	-	-	-	-	-	-	-	-	-	-	-	-	-
GCF_045791385.1	food	Microbe sample from Acinetobacter baumannii	-	not applicable	bacterial sample	-	-	-	-	-	-	-	-	-	-	-	-	-	-	-	-	-	-	-
GCF_045791375.1	food	Microbe sample from Acinetobacter baumannii	-	not applicable	bacterial sample	-	-	-	-	-	-	-	-	-	-	-	-	-	-	-	-	-	-	-
GCF_045791355.1	food	Microbe sample from Acinetobacter baumannii	-	not applicable	bacterial sample	-	-	-	-	-	-	-	-	-	-	-	-	-	-	-	-	-	-	-
GCF_045791325.1	food	Microbe sample from Acinetobacter baumannii	-	not applicable	bacterial sample	-	-	-	-	-	-	-	-	-	-	-	-	-	-	-	-	-	-	-
GCF_045791265.1	food	Microbe sample from Acinetobacter baumannii	-	not applicable	bacterial sample	-	-	-	-	-	-	-	-	-	-	-	-	-	-	-	-	-	-	-
GCF_045791315.1	food	Microbe sample from Acinetobacter baumannii	-	not applicable	bacterial sample	-	-	-	-	-	-	-	-	-	-	-	-	-	-	-	-	-	-	-
GCF_045791275.1	food	Microbe sample from Acinetobacter baumannii	-	not applicable	bacterial sample	-	-	-	-	-	-	-	-	-	-	-	-	-	-	-	-	-	-	-
GCF_045791255.1	food	Microbe sample from Acinetobacter baumannii	-	not applicable	bacterial sample	-	-	-	-	-	-	-	-	-	-	-	-	-	-	-	-	-	-	-
GCF_045791235.1	food	Microbe sample from Acinetobacter baumannii	-	not applicable	bacterial sample	-	-	-	-	-	-	-	-	-	-	-	-	-	-	-	-	-	-	-
GCF_045791185.1	food	Microbe sample from Acinetobacter baumannii	-	not applicable	bacterial sample	-	-	-	-	-	-	-	-	-	-	-	-	-	-	-	-	-	-	-
GCF_045791215.1	food	Microbe sample from Acinetobacter baumannii	-	not applicable	bacterial sample	-	-	-	-	-	-	-	-	-	-	-	-	-	-	-	-	-	-	-
GCF_045791155.1	food	Microbe sample from Acinetobacter baumannii	-	not applicable	bacterial sample	-	-	-	-	-	-	-	-	-	-	-	-	-	-	-	-	-	-	-
GCF_045791165.1	food	Microbe sample from Acinetobacter baumannii	-	not applicable	bacterial sample	-	-	-	-	-	-	-	-	-	-	-	-	-	-	-	-	-	-	-
GCF_045791135.1	food	Microbe sample from Acinetobacter baumannii	-	not applicable	bacterial sample	-	-	-	-	-	-	-	-	-	-	-	-	-	-	-	-	-	-	-
GCF_045791095.1	food	Microbe sample from Acinetobacter baumannii	-	not applicable	bacterial sample	-	-	-	-	-	-	-	-	-	-	-	-	-	-	-	-	-	-	-
GCF_045791115.1	food	Microbe sample from Acinetobacter baumannii	-	not applicable	bacterial sample	-	-	-	-	-	-	-	-	-	-	-	-	-	-	-	-	-	-	-
GCF_045791035.1	food	Microbe sample from Acinetobacter baumannii	-	not applicable	bacterial sample	-	-	-	-	-	-	-	-	-	-	-	-	-	-	-	-	-	-	-
GCF_045791065.1	food	Microbe sample from Acinetobacter baumannii	-	not applicable	bacterial sample	-	-	-	-	-	-	-	-	-	-	-	-	-	-	-	-	-	-	-
GCF_045791055.1	food	Microbe sample from Acinetobacter baumannii	-	not applicable	bacterial sample	-	-	-	-	-	-	-	-	-	-	-	-	-	-	-	-	-	-	-
GCF_045790945.1	food	Microbe sample from Acinetobacter baumannii	-	not applicable	bacterial sample	-	-	-	-	-	-	-	-	-	-	-	-	-	-	-	-	-	-	-
GCF_045790955.1	food	Microbe sample from Acinetobacter baumannii	-	not applicable	bacterial sample	-	-	-	-	-	-	-	-	-	-	-	-	-	-	-	-	-	-	-
GCF_045790975.1	food	Microbe sample from Acinetobacter baumannii	-	not applicable	bacterial sample	-	-	-	-	-	-	-	-	-	-	-	-	-	-	-	-	-	-	-
GCF_045790985.1	food	Microbe sample from Acinetobacter baumannii	-	not applicable	bacterial sample	-	-	-	-	-	-	-	-	-	-	-	-	-	-	-	-	-	-	-
GCF_045790935.1	food	Microbe sample from Acinetobacter baumannii	-	not applicable	bacterial sample	-	-	-	-	-	-	-	-	-	-	-	-	-	-	-	-	-	-	-
GCF_045790885.1	food	Microbe sample from Acinetobacter baumannii	-	not applicable	bacterial sample	-	-	-	-	-	-	-	-	-	-	-	-	-	-	-	-	-	-	-
GCF_045790865.1	food	Microbe sample from Acinetobacter baumannii	-	not applicable	bacterial sample	-	-	-	-	-	-	-	-	-	-	-	-	-	-	-	-	-	-	-
GCF_045790855.1	food	Microbe sample from Acinetobacter baumannii	-	not applicable	bacterial sample	-	-	-	-	-	-	-	-	-	-	-	-	-	-	-	-	-	-	-
GCF_045790835.1	food	Microbe sample from Acinetobacter baumannii	-	not applicable	bacterial sample	-	-	-	-	-	-	-	-	-	-	-	-	-	-	-	-	-	-	-
GCF_045790875.1	food	Microbe sample from Acinetobacter baumannii	-	not applicable	bacterial sample	-	-	-	-	-	-	-	-	-	-	-	-	-	-	-	-	-	-	-
GCF_045790815.1	food	Microbe sample from Acinetobacter baumannii	-	not applicable	bacterial sample	-	-	-	-	-	-	-	-	-	-	-	-	-	-	-	-	-	-	-
GCF_045790755.1	food	Microbe sample from Acinetobacter baumannii	-	not applicable	bacterial sample	-	-	-	-	-	-	-	-	-	-	-	-	-	-	-	-	-	-	-
GCF_045790765.1	food	Microbe sample from Acinetobacter baumannii	-	not applicable	bacterial sample	-	-	-	-	-	-	-	-	-	-	-	-	-	-	-	-	-	-	-
GCF_045790735.1	food	Microbe sample from Acinetobacter baumannii	-	not applicable	bacterial sample	-	-	-	-	-	-	-	-	-	-	-	-	-	-	-	-	-	-	-
GCF_045790745.1	food	Microbe sample from Acinetobacter baumannii	-	not applicable	bacterial sample	-	-	-	-	-	-	-	-	-	-	-	-	-	-	-	-	-	-	-
GCF_019264845.1	food	Pathogen	-	-	-	-	-	-	-	-	-	-	-	-	-	-	-	-	-	-	-	-	-	-
GCF_019264785.1	food	Pathogen	-	-	-	-	-	-	-	-	-	-	-	-	-	-	-	-	-	-	-	-	-	-
GCF_019264805.1	food	Pathogen	-	-	-	-	-	-	-	-	-	-	-	-	-	-	-	-	-	-	-	-	-	-
GCF_045790715.1	food	Microbe sample from Acinetobacter baumannii	-	not applicable	bacterial sample	-	-	-	-	-	-	-	-	-	-	-	-	-	-	-	-	-	-	-
GCF_045790675.1	food	Microbe sample from Acinetobacter baumannii	-	not applicable	bacterial sample	-	-	-	-	-	-	-	-	-	-	-	-	-	-	-	-	-	-	-
GCF_045790655.1	food	Microbe sample from Acinetobacter baumannii	-	not applicable	bacterial sample	-	-	-	-	-	-	-	-	-	-	-	-	-	-	-	-	-	-	-
GCF_045790635.1	food	Microbe sample from Acinetobacter baumannii	-	not applicable	bacterial sample	-	-	-	-	-	-	-	-	-	-	-	-	-	-	-	-	-	-	-
GCF_045790645.1	food	Microbe sample from Acinetobacter baumannii	-	not applicable	bacterial sample	-	-	-	-	-	-	-	-	-	-	-	-	-	-	-	-	-	-	-
GCF_045790615.1	food	Microbe sample from Acinetobacter baumannii	-	not applicable	bacterial sample	-	-	-	-	-	-	-	-	-	-	-	-	-	-	-	-	-	-	-
GCF_045790585.1	food	Microbe sample from Acinetobacter baumannii	-	not applicable	bacterial sample	-	-	-	-	-	-	-	-	-	-	-	-	-	-	-	-	-	-	-
GCF_045790575.1	food	Microbe sample from Acinetobacter baumannii	-	not applicable	bacterial sample	-	-	-	-	-	-	-	-	-	-	-	-	-	-	-	-	-	-	-
GCF_045790545.1	food	Microbe sample from Acinetobacter baumannii	-	not applicable	bacterial sample	-	-	-	-	-	-	-	-	-	-	-	-	-	-	-	-	-	-	-
GCF_045790535.1	food	Microbe sample from Acinetobacter baumannii	-	not applicable	bacterial sample	-	-	-	-	-	-	-	-	-	-	-	-	-	-	-	-	-	-	-
GCF_045790515.1	food	Microbe sample from Acinetobacter baumannii	-	not applicable	bacterial sample	-	-	-	-	-	-	-	-	-	-	-	-	-	-	-	-	-	-	-
GCF_045790475.1	food	Microbe sample from Acinetobacter baumannii	-	not applicable	bacterial sample	-	-	-	-	-	-	-	-	-	-	-	-	-	-	-	-	-	-	-
GCF_045790455.1	food	Microbe sample from Acinetobacter baumannii	-	not applicable	bacterial sample	-	-	-	-	-	-	-	-	-	-	-	-	-	-	-	-	-	-	-
GCF_045790485.1	food	Microbe sample from Acinetobacter baumannii	-	not applicable	bacterial sample	-	-	-	-	-	-	-	-	-	-	-	-	-	-	-	-	-	-	-
GCF_045790355.1	food	Microbe sample from Acinetobacter baumannii	-	not applicable	bacterial sample	-	-	-	-	-	-	-	-	-	-	-	-	-	-	-	-	-	-	-
GCF_045790405.1	food	Microbe sample from Acinetobacter baumannii	-	not applicable	bacterial sample	-	-	-	-	-	-	-	-	-	-	-	-	-	-	-	-	-	-	-
GCF_045790415.1	food	Microbe sample from Acinetobacter baumannii	-	not applicable	bacterial sample	-	-	-	-	-	-	-	-	-	-	-	-	-	-	-	-	-	-	-
GCF_045790375.1	food	Microbe sample from Acinetobacter baumannii	-	not applicable	bacterial sample	-	-	-	-	-	-	-	-	-	-	-	-	-	-	-	-	-	-	-
GCF_045790385.1	food	Microbe sample from Acinetobacter baumannii	-	not applicable	bacterial sample	-	-	-	-	-	-	-	-	-	-	-	-	-	-	-	-	-	-	-
GCA_045791775.1	food	Microbe sample from Acinetobacter baumannii	-	not applicable	bacterial sample	-	-	-	-	-	-	-	-	-	-	-	-	-	-	-	-	-	-	-
GCA_045791765.1	food	Microbe sample from Acinetobacter baumannii	-	not applicable	bacterial sample	-	-	-	-	-	-	-	-	-	-	-	-	-	-	-	-	-	-	-
GCA_045791575.1	food	Microbe sample from Acinetobacter baumannii	-	not applicable	bacterial sample	-	-	-	-	-	-	-	-	-	-	-	-	-	-	-	-	-	-	-
GCF_040067455.1	clean room of pharmaceutical factory	Microbe sample from Acinetobacter baumannii	-	-	cell culture	-	-	-	-	-	-	-	-	-	-	-	-	-	-	-	-	-	-	-
GCF_040068065.1	clean room of pharmaceutical factory	Microbe sample from Acinetobacter baumannii	-	-	cell culture	-	-	-	-	-	-	-	-	-	-	-	-	-	-	-	-	-	-	-
GCF_040066995.1	clean room of pharmaceutical factory	Microbe sample from Acinetobacter baumannii	-	-	cell culture	-	-	-	-	-	-	-	-	-	-	-	-	-	-	-	-	-	-	-
GCF_040067405.1	clean room of pharmaceutical factory	Microbe sample from Acinetobacter baumannii	-	-	cell culture	-	-	-	-	-	-	-	-	-	-	-	-	-	-	-	-	-	-	-
GCF_040067475.1	clean room of pharmaceutical factory	Microbe sample from Acinetobacter baumannii	-	-	cell culture	-	-	-	-	-	-	-	-	-	-	-	-	-	-	-	-	-	-	-
GCF_040067655.1	clean room of pharmaceutical factory	Microbe sample from Acinetobacter baumannii	-	-	cell culture	-	-	-	-	-	-	-	-	-	-	-	-	-	-	-	-	-	-	-
GCA_044540135.1	The surface of the manipulation table	Pathogen	-	-	-	-	-	-	-	-	-	-	-	-	-	-	-	-	-	-	-	-	-	-
GCA_002341705.1	kitchen counter	Uncultivated Acinetobacter baumannii UBA2492 genome recovered from SRX666364	-	UBA2492	metagenomic assembly	-	-	-	-	-	indoor metagenome	-	-	This BioSample is a metagenomic assembly obtained from the indoor metagenome reads: SRR1532740.	-	-	-	-	-	-	-	-	-	-
GCF_018361325.1	hospital wastewater	Pathogen	-	-	-	-	-	-	-	-	-	-	-	-	-	-	-	-	-	-	-	-	-	-
GCF_022427075.1	Hospital effluent	Pathogen	-	-	-	-	-	-	-	-	-	-	-	-	-	-	-	-	-	-	-	-	-	-
GCF_029841815.1	-	MIGS Cultured Bacterial/Archaeal sample from Acinetobacter baumannii	-	-	-	-	Sink	Basin	surface swab	-	-	-	-	-	-	-	-	-	-	-	-	-	-	-
GCF_029840315.1	-	MIGS Cultured Bacterial/Archaeal sample from Acinetobacter baumannii	-	-	-	-	Sink	Drain	surface swab	-	-	-	-	-	-	-	-	-	-	-	-	-	-	-
GCF_029839685.1	-	MIGS Cultured Bacterial/Archaeal sample from Acinetobacter baumannii	-	-	-	-	Sink	Basin	surface swab	-	-	-	-	-	-	-	-	-	-	-	-	-	-	-
GCF_029839705.1	-	MIGS Cultured Bacterial/Archaeal sample from Acinetobacter baumannii	-	-	-	-	Sink	Basin	surface swab	-	-	-	-	-	-	-	-	-	-	-	-	-	-	-
GCF_029839505.1	-	MIGS Cultured Bacterial/Archaeal sample from Acinetobacter baumannii	-	-	-	-	Sink	Basin	surface swab	-	-	-	-	-	-	-	-	-	-	-	-	-	-	-
GCF_029836615.1	-	MIGS Cultured Bacterial/Archaeal sample from Acinetobacter baumannii	-	-	-	-	Sink	Basin	surface swab	-	-	-	-	-	-	-	-	-	-	-	-	-	-	-
GCF_029836515.1	-	MIGS Cultured Bacterial/Archaeal sample from Acinetobacter baumannii	-	-	-	-	Sink	Drain	surface swab	-	-	-	-	-	-	-	-	-	-	-	-	-	-	-
GCF_039769465.1	environmental swab	Pathogen	Environmental	-	-	Acinetobacter baumannii	-	-	-	-	-	-	-	-	-	-	-	-	-	-	-	-	-	-
GCF_039769595.1	Sink Plumbing Trap	Pathogen	Environmental	-	-	Acinetobacter baumannii	-	-	-	-	-	-	-	-	-	-	-	-	-	-	-	-	-	-
GCF_039769585.1	Sink Basin	Pathogen	Environmental	-	-	Acinetobacter baumannii	-	-	-	-	-	-	-	-	-	-	-	-	-	-	-	-	-	-
GCF_039769605.1	Sink Basin	Pathogen	Environmental	-	-	Acinetobacter baumannii	-	-	-	-	-	-	-	-	-	-	-	-	-	-	-	-	-	-
GCF_045065535.1	precooked food	Pathogen	missing	-	-	missing	-	-	-	-	-	-	-	-	-	-	-	-	-	-	-	-	-	-
Count of Unique Values =	1	1	1	1	1	1	1	1	1	1	1	1	1	1	1	1	1	1	1	1	1	1	1	1
