# Supplementary material for: Global multi-host genomic epidemiology of a superbug reveals transmission at One Health interfaces
Source: Research Square preprint supplement (doi:10.21203/rs.3.rs-8226752/v1), 2025-12-04
Supplement: Supplementary file 2 [file 0a2c3749f8ed2e3eacc08910.xlsx]

## Sheet: Sheet1
Classification proposed in this study						Types
General class	Intermediate class	Specific class (SOURCE)	Count		General class	5
human-related	N/A	N/A	22155		Intermediate class	15
animal	wildlife	stork	263		Specific class (sources)	97
animal	companion_animal	cat	43
animal	companion_animal	dog	33
animal	farm_animal	horse	20
animal	farm_animal	pig	20
animal	wildlife	worm	20
animal	food	cow_milk	16
animal	farm_animal	cow	14
animal	farm_animal	chicken	9
animal	food	chicken_meat	7
animal	food	pig_meat	6
animal	food	salmon	6
animal	farm_animal	duck	5
animal	companion_animal	pet_undefined	5
animal	wildlife	lizard	4
animal	wildlife	mouse	4
animal	farm_animal	turkey	4
animal	farm_animal	goose	3
animal	wildlife	shrew	3
animal	food	shrimp	3
animal	insect	bee_honey	2
animal	wildlife	bird	2
animal	food	buffalo_meat	2
animal	wildlife	fish	2
animal	wildlife	pangolin	2
animal	wildlife	rabbit	2
animal	farm_animal	sheep	2
animal	food	sheep_meat	2
animal	wildlife	snake	2
animal	companion_animal	ferret	1
animal	wildlife	heron	1
animal	wildlife	kestrel	1
animal	wildlife	mallard	1
animal	wildlife	owl	1
animal	wildlife	parrot	1
animal	wildlife	python	1
animal	wildlife	salamander	1
animal	wildlife	turtle	1
animal	food	undefined_prawn_tissue	1
animal	wildlife	wolf	1
environment	soil	soil_sample	95
environment	water	sewage	33
environment	environmental_isolate	undefined	33
environment	water	wastewater	29
environment	soil	no_manure_grass	25
environment	soil	chicken_manure_grass	22
environment	water	river	11
environment	domestic	sink	10
environment	soil	cow_manure_grass	9
environment	urban	urban_metagenome	9
environment	water	wastewater_chlorinated	6
environment	water	agricultural_surface_water	5
environment	soil	pig_manure_grass	5
environment	water	lake	3
environment	environmental_isolate	outdoor_air	3
environment	water	wastewater_sludge	3
environment	water	water_sample	3
environment	water	surface_water_downstream	2
environment	environmental_isolate	swab	2
environment	water	wastewater_hospital	2
environment	water	wastewater_sullage	2
environment	water	wastewater_treatment_plant	2
environment	water	well	2
environment	water	artesian_well	1
environment	soil	contaminated_soil	1
environment	water	feedlot_water	1
environment	domestic	kitchen_counter	1
environment	soil	mangrove_soil	1
environment	soil	rhizosphere_soil	1
environment	soil	semi_pristine_soil	1
environment	water	surface_water_pond	1
environment	soil	unpolluted_farm_soil	1
environment	soil	vegetable_market_soil	1
environment	water	wastewater_effluent	1
industrial	processing	food_sample	76
industrial	facility	draining_conveyor	56
industrial	farm_facility	chick_box_paper	23
industrial	facility	clean_room	6
industrial	processing	oil_reservoir	6
industrial	farm_facility	boot_swab	2
industrial	processing	wood	2
industrial	farm_facility	hatchery_air	1
industrial	facility	manipulation_table	1
industrial	processing	metal	1
industrial	processing	mine_drainage	1
industrial	processing	paper_mill	1
industrial	processing	paper_pulp	1
plant	other	undefined_root	10
plant	crop	coconut_meat	6
plant	crop	peach	4
plant	other	guayule	2
plant	other	nettle_root	2
plant	other	Aeschynomene_fluminensis_root	1
plant	crop	cucumber_rhizosphere	1
plant	other	Epilobium_root_compost	1
plant	crop	undefined_leaf	1
plant	other	undefined_plant	1
			23205
			Total Genomes
N/A: Not applicable to the human-related classification. It is not counted as a category
