# Supplementary material for: Global multi-host genomic epidemiology of a superbug reveals transmission at One Health interfaces
Source: Research Square preprint supplement (doi:10.21203/rs.3.rs-8226752/v1), 2025-12-04
Supplement: Supplementary file 3 [file 235afca582ac19380b0a5afc.xlsx]

## Sheet: Sampling Geography and Date
Continent	Country	ISO Alpha-3 Code	Counts					Counts
			Total	Human Related	Non Human		Collection Date	Human Related	Non Human
Africa	Nigeria	NGA	94	66	28		1900	2	0
Africa	Botswana	BWA	28	24	4		1905	3	0
Africa	South Africa	ZAF	127	125	2		1911	2	0
Africa	Algeria	DZA	1	1	0		1943	0	1
Africa	Benin	BEN	1	1	0		1944	0	1
Africa	Burkina Faso	BFA	3	3	0		1948	10	0
Africa	Cote d'Ivoire	CIV	4	4	0		1950	1	0
Africa	Egypt	EGY	170	170	0		1951	3	0
Africa	Ethiopia	ETH	3	3	0		1959	1	0
Africa	Gambia	GMB	3	3	0		1962	1	0
Africa	Ghana	GHA	11	11	0		1966	1	0
Africa	Kenya	KEN	28	28	0		1970	2	0
Africa	Libya	LBY	4	4	0		1977	1	0
Africa	Morocco	MAR	8	8	0		1982	5	0
Africa	Reunion	REU	14	14	0		1984	4	0
Africa	Rwanda	RWA	5	5	0		1985	2	0
Africa	Sudan	SDN	44	44	0		1986	1	0
Africa	Tanzania	TZA	60	60	0		1987	2	0
Africa	Togo	TGO	13	13	0		1991	2	0
Africa	Tunisia	TUN	65	65	0		1992	4	0
Africa	Uganda	UGA	1	1	0		1993	5	0
Africa	Zambia	ZMB	4	4	0		1994	7	0
Asia	China	CHN	5099	5018	81		1995	5	0
Asia	India	IND	411	380	31		1996	7	0
Asia	Indonesia	IDN	8	0	8		1997	14	0
Asia	Pakistan	PAK	114	109	5		1998	11	0
Asia	Thailand	THA	598	593	5		1999	13	0
Asia	Japan	JPN	260	257	3		2000	31	1
Asia	Bangladesh	BGD	33	31	2		2001	28	0
Asia	Lebanon	LBN	85	83	2		2002	54	0
Asia	Russia	RUS	194	192	2		2003	110	0
Asia	Malaysia	MYS	184	183	1		2004	94	0
Asia	Singapore	SGP	275	274	1		2005	81	1
Asia	South Korea	PRK	206	205	1		2006	135	15
Asia	Viet Nam	VNM	555	554	1		2007	230	0
Asia	Afghanistan	AFG	52	52	0		2008	243	1
Asia	Cambodia	KHM	4	4	0		2009	290	1
Asia	Hong Kong	HKG	17	17	0		2010	400	3
Asia	Iran	IRN	19	19	0		2011	447	5
Asia	Iraq	IRQ	27	27	0		2012	468	11
Asia	Israel	ISR	250	250	0		2013	641	38
Asia	Jordan	JOR	5	5	0		2014	788	31
Asia	Korea	PRK	7	7	0		2015	892	100
Asia	Kuwait	KWT	99	99	0		2016	1124	62
Asia	Myanmar	MMR	35	35	0		2017	1129	117
Asia	Nepal	NPL	169	169	0		2018	1707	136
Asia	Oman	OMN	1	1	0		2019	1749	346
Asia	Saudi Arabia	SAU	138	138	0		2020	1389	29
Asia	Taiwan	TWN	44	44	0		2021	2909	17
Asia	United Arab Emirates	ARE	1	1	0		2022	2024	13
Europe	Poland	POL	360	122	238		2023	2032	57
Europe	Germany	DEU	684	475	209		2024	1330	25
Europe	France	FRA	262	163	99		2025	28	0
Europe	Ireland	IRL	61	0	61		Total	51	22
Europe	Switzerland	CHE	185	152	33		Years of A. baumannii Isolation
Europe	Romania	ROU	237	208	29
Europe	United Kingdom	GBR	63	48	15
Europe	Spain	ESP	231	223	8
Europe	Croatia	HRV	27	20	7
Europe	Netherlands	NLD	41	35	6
Europe	Italy	ITA	210	205	5
Europe	Finland	FIN	2	0	2
Europe	Czech Republic	CZE	26	25	1
Europe	Luxembourg	LUX	1	0	1
Europe	Portugal	PRT	43	42	1
Europe	Albania	ALB	4	4	0
Europe	Austria	AUT	1	1	0
Europe	Belarus	BLR	3	3	0
Europe	Belgium	BEL	95	95	0
Europe	Bosnia and Herzegovina	BIH	10	10	0
Europe	Bulgaria	BGR	3	3	0
Europe	Cyprus	CYP	4	4	0
Europe	Denmark	DNK	10	10	0
Europe	Estonia	EST	1	1	0
Europe	Georgia	GEO	22	22	0
Europe	Greece	GRC	141	141	0
Europe	Hungary	HUN	419	419	0
Europe	Kazakhstan	KAZ	4	4	0
Europe	Kosovo	KSV	31	31	0
Europe	Lithuania	LTU	1	1	0
Europe	Montenegro	MNE	12	12	0
Europe	Serbia	SRB	186	186	0
Europe	Slovakia	SVK	4	4	0
Europe	Sweden	SWE	16	16	0
Europe	Turkey	TUR	40	40	0
Europe	Ukraine	UKR	107	107	0
North America	USA	USA	7422	7323	99
North America	Canada	CAN	122	89	33
North America	Dominican Republic	DOM	7	0	7
North America	Guatemala	GTM	11	11	0
North America	Honduras	HND	19	19	0
North America	Mexico	MEX	143	143	0
North America	Nicaragua	NIC	2	2	0
North America	Puerto Rico	PRI	2	2	0
Oceania	Australia	AUS	341	340	1
Oceania	Fiji	FJI	78	78	0
Oceania	New Zealand	NZL	7	7	0
South America	Brazil	BRA	323	308	15
South America	Argentina	ARG	56	56	0
South America	Bolivia	BOL	56	56	0
South America	Chile	CHL	48	48	0
South America	Colombia	COL	15	15	0
South America	Ecuador	ECU	8	8	0
South America	Paraguay	PRY	57	57	0
South America	Peru	PER	8	8	0
South America	Venezuela	VEN	5	5	0
Missing			1347	1344	3
Total			23205	22155	1050
			Counts
			Total	Human Related	Non Human
Countries with A. baumannii isolates			106	101	36
