# Supplementary material for: Global multi-host genomic epidemiology of a superbug reveals transmission at One Health interfaces
Source: Research Square preprint supplement (doi:10.21203/rs.3.rs-8226752/v1), 2025-12-04
Supplement: Supplementary file 4 [file e9923314937b5b0c2b6f8a58.xlsx]

## Sheet: 23,205 genome metadata
NCBI-sourced genomic data					ANI vs. A. baumannii ATCC 19606	CheckM quality metrics		NCBI BioSample attributes with most available data
Assembly ID	Bioproject	Biosample	Assembly Level	Type Source	ANI Identity (%)	Completeness (%	Contamination (%)	Geographic Location	Collection Date	Host	Strain	Isolation Source
GCF_000828935.1	PRJNA224116	SAMD00020223	Complete Genome	REFSEQ	97.976	100	0.136986	Nepal	2013	Homo sapiens	IOMTU433	-
GCF_001895125.2	PRJNA224116	SAMD00059694	Complete Genome	REFSEQ	97.9938	100	0.684932	not applicable	2015	-	OCU_Ac16a	-
GCF_000828795.1	PRJNA224116	SAMD00061019	Complete Genome	REFSEQ	98.0834	99.1939	0.800722	-	-	-	NCGM 237	-
GCF_016865465.1	PRJNA224116	SAMD00169927	Complete Genome	REFSEQ	97.9996	99.4339	0.431196	Cambodia	2017	Homo sapiens	NIPH17_0019	-
GCF_014159355.1	PRJNA224116	SAMD00194470	Complete Genome	REFSEQ	97.9524	100	0.0913242	Japan	2018	-	WP4-W18-ESBL-11	-
GCF_014169655.1	PRJNA224116	SAMD00194616	Complete Genome	REFSEQ	98.041	99.726	0	Japan	2018	-	WP8-W18-ESBL-11	-
GCF_027943685.1	PRJNA224116	SAMD00258369	Complete Genome	REFSEQ	98.1473	99.9813	0.628046	Japan	2016	Homo sapiens	OCU-Ac19	-
GCF_019703285.1	PRJNA224116	SAMD00330123	Complete Genome	REFSEQ	97.9383	100	0.365297	Japan	2016	Homo sapiens	OCU Ac18	-
GCF_025995075.1	PRJNA224116	SAMD00467119	Complete Genome	REFSEQ	99.9976	99.6347	0	not applicable	not applicable	-	ATCC 19606	-
GCF_041154775.1	PRJNA224116	SAMD00778454	Complete Genome	REFSEQ	97.9419	100	0.410959	Nepal	2019	Homo sapiens	JUNP402	-
GCF_041154785.1	PRJNA224116	SAMD00778455	Complete Genome	REFSEQ	98.0788	99.9156	0.772856	Nepal	2019	Homo sapiens	JUNP403	-
GCF_041154795.1	PRJNA224116	SAMD00778456	Complete Genome	REFSEQ	98.0999	99.9813	0.772856	Nepal	2019	Homo sapiens	JUNP405	-
GCF_041154805.1	PRJNA224116	SAMD00778457	Complete Genome	REFSEQ	98.0267	100	0	Nepal	2019	Homo sapiens	JUNP406	-
GCF_041154815.1	PRJNA224116	SAMD00778461	Complete Genome	REFSEQ	98.0782	99.2654	0.628046	Nepal	2019	Homo sapiens	JUNP419	-
GCF_041154825.1	PRJNA224116	SAMD00778471	Complete Genome	REFSEQ	97.9915	100	0	Nepal	2019	Homo sapiens	JUNP496	-
GCF_041154835.1	PRJNA224116	SAMD00778472	Complete Genome	REFSEQ	97.9366	100	0.273973	Nepal	2019	Homo sapiens	JUNP499	-
GCF_041154845.1	PRJNA224116	SAMD00778479	Complete Genome	REFSEQ	97.9387	99.1781	0.136986	Nepal	2019	Homo sapiens	JUNP514	-
GCF_041154855.1	PRJNA224116	SAMD00778487	Complete Genome	REFSEQ	97.9774	100	0.136986	Nepal	2019	Homo sapiens	JUNP543	-
GCF_041154875.1	PRJNA224116	SAMD00778518	Complete Genome	REFSEQ	97.9424	100	0.273973	Nepal	2020	Homo sapiens	JUNP712	-
GCF_900088705.1	PRJNA224116	SAMEA2439285	Complete Genome	REFSEQ	98.0974	99.9813	0.628046	-	-	Homo sapiens	BAL062	-
GCF_000069245.1	PRJNA224116	SAMEA3138279	Complete Genome	REFSEQ	97.9202	100	0.273973	-	-	-	AYE	-
GCF_900478145.1	PRJNA224116	SAMEA3146530	Complete Genome	REFSEQ	97.8745	100	0	United Kingdom	2004	Homo sapiens	NCTC13421	not available: to be reported later
GCF_900093475.1	PRJNA224116	SAMEA3310339	Complete Genome	REFSEQ	97.9449	100	0	-	-	not available	NCTC7364	not available: to be reported later
GCF_001457535.1	PRJNA224116	SAMEA3449716	Complete Genome	REFSEQ	97.8361	100	0	USA	1950	-	-	-
GCF_001517645.1	PRJNA224116	SAMEA3715145	Complete Genome	REFSEQ	97.8414	100	0.136986	France	2014	-	-	-
GCF_001261895.2	PRJNA224116	SAMEA3751109	Complete Genome	REFSEQ	97.9187	100	0.821918	France	2013	-	-	-
GCF_000498375.2	PRJNA224116	SAMN02470137	Complete Genome	REFSEQ	98.1129	99.5876	0.609299	-	-	-	DU202	-
GCF_000021245.2	PRJNA224116	SAMN02603051	Complete Genome	REFSEQ	97.884	100	0	-	-	-	AB0057	-
GCF_000187205.2	PRJNA224116	SAMN02603104	Complete Genome	REFSEQ	98.1071	99.5876	0.96363	-	-	-	MDR-TJ	-
GCF_000018445.1	PRJNA224116	SAMN02603140	Complete Genome	REFSEQ	98.1319	99.9813	0.628046	-	-	-	ACICU	-
GCF_000188215.1	PRJNA224116	SAMN02603494	Complete Genome	REFSEQ	98.1163	99.9813	0.609299	-	-	-	1656-2	-
GCF_000186665.3	PRJNA224116	SAMN02603576	Complete Genome	REFSEQ	97.9749	100	0.684932	Australia	-	Homo sapiens	D1279779	-
GCF_000302575.1	PRJNA224116	SAMN02603667	Complete Genome	REFSEQ	98.1156	97.5833	2.30524	-	-	-	TYTH-1	-
GCF_000226275.2	PRJNA224116	SAMN02603878	Complete Genome	REFSEQ	98.0818	99.9813	0.609299	China	2006	-	MDR-ZJ06	-
GCF_002803025.2	PRJNA224116	SAMN02603889	Complete Genome	REFSEQ	97.8947	100	0	-	-	-	AB307-0294	-
GCF_000419385.1	PRJNA224116	SAMN02604244	Complete Genome	REFSEQ	98.1125	99.9813	0.609299	-	-	-	BJAB07104	-
GCF_000419405.1	PRJNA224116	SAMN02604245	Complete Genome	REFSEQ	97.9242	100	0	-	-	-	BJAB0715	-
GCF_000419425.1	PRJNA224116	SAMN02604246	Complete Genome	REFSEQ	98.0226	99.9025	0.609299	-	-	-	BJAB0868	-
GCF_000505685.1	PRJNA224116	SAMN02641530	Complete Genome	REFSEQ	97.9965	100	0.273973	missing	missing	missing	ZW85-1	missing
GCF_000786735.1	PRJNA224116	SAMN02709859	Complete Genome	REFSEQ	97.8758	99.9696	0.273973	USA	1997	Homo sapiens	LAC-4	unavailable
GCF_000695855.3	PRJNA224116	SAMN02714232	Complete Genome	REFSEQ	98.1398	99.9813	0.658331	Malaysia	2011	Homo sapiens	AC29	Endotracheal Secretion
GCF_000963815.1	PRJNA224116	SAMN02894434	Complete Genome	REFSEQ	97.8991	100	0.136986	USA	2008	Homo sapiens	AB5075-UW	tibia/osteomyelitis of diabetes patient
GCF_000746645.1	PRJNA224116	SAMN02940899	Complete Genome	REFSEQ	98.0124	100	0.821918	Canada	2010	Homo sapiens	AB30	hospital
GCF_000746605.1	PRJNA224116	SAMN02940901	Complete Genome	REFSEQ	97.9479	100	0.119863	Canada	2010	Homo sapiens	AB31	hospital
GCF_000761175.1	PRJNA224116	SAMN03075316	Complete Genome	REFSEQ	98.0504	99.726	0.821918	Not applicable	Not applicable	Not applicable	Strain AbH12O-A2	Not applicable
GCF_000794125.2	PRJNA224116	SAMN03105183	Complete Genome	REFSEQ	97.8904	100	0	Australia	2002	Homo sapiens	AB6870155	Human sputum
GCF_000830055.1	PRJNA224116	SAMN03248539	Complete Genome	REFSEQ	97.9131	100	0	United Kingdom	1982	Homo sapiens	-	unknown
GCF_000814345.1	PRJNA224116	SAMN03263969	Complete Genome	REFSEQ	97.8877	99.726	0.410959	Colombia	2012	Homo sapiens	6200	bodily fluid
GCF_001026965.1	PRJNA224116	SAMN03290686	Complete Genome	REFSEQ	98.1055	99.9813	0.609299	China	2014	Homo sapiens	XH386	Lower respiratory tract
GCF_001077555.2	PRJNA224116	SAMN03770534	Complete Genome	REFSEQ	97.9608	100	0.328767	India	2014	Homo sapiens	B8342	blood
GCF_001077965.2	PRJNA224116	SAMN03771402	Complete Genome	REFSEQ	97.946	100	0.0913242	India	2015	Homo sapiens	B8300	blood
GCF_001077675.1	PRJNA224116	SAMN03817043	Complete Genome	REFSEQ	98.0037	100	0.273973	Canada	2014	Homo sapiens	ATCC 17978-mff	missing
GCF_001077655.1	PRJNA224116	SAMN03817045	Complete Genome	REFSEQ	97.8373	100	0.547945	Canada	2012	Homo sapiens	Ab04-mff	blood
GCF_001573125.1	PRJNA224116	SAMN03890253	Complete Genome	REFSEQ	98.1118	99.9813	0.609299	China	2010	Homo sapiens	XH856	drainage fluid
GCF_001573105.1	PRJNA224116	SAMN03890255	Complete Genome	REFSEQ	98.1051	100	0	China	2010	Homo sapiens	XH857	sputum
GCF_001578145.1	PRJNA224116	SAMN03890256	Complete Genome	REFSEQ	97.9642	99.5876	0.682727	China	2010	Homo sapiens	XH858	sputum
GCF_001573085.1	PRJNA224116	SAMN03890257	Complete Genome	REFSEQ	98.0467	99.9813	0.638687	China	2009	Homo sapiens	XH859	wound
GCF_001573065.1	PRJNA224116	SAMN03890258	Complete Genome	REFSEQ	98.1282	97.6872	0.609299	China	2009	Homo sapiens	XH860	-
GCF_001514375.1	PRJNA224116	SAMN03941550	Complete Genome	REFSEQ	98.0799	99.8828	0.628046	South Korea	2012	Homo sapiens	KBN10P02143	pus
GCF_003547115.1	PRJNA224116	SAMN04014893	Complete Genome	REFSEQ	97.9341	99.1781	0.479452	missing	missing	missing	-	missing
GCF_003029495.1	PRJNA224116	SAMN04014897	Complete Genome	REFSEQ	98.1137	99.5876	0.609299	missing	missing	missing	AR_0056	missing
GCF_002947845.1	PRJNA224116	SAMN04014904	Complete Genome	REFSEQ	98.1145	99.4521	0.593607	missing	missing	missing	AR_0063	missing
GCF_003431865.1	PRJNA224116	SAMN04014911	Complete Genome	REFSEQ	97.9338	100	0.479452	missing	missing	missing	-	missing
GCF_002948925.1	PRJNA224116	SAMN04014919	Complete Genome	REFSEQ	97.923	100	0.273973	missing	missing	missing	AR_0078	missing
GCF_002996805.1	PRJNA224116	SAMN04014924	Complete Genome	REFSEQ	97.8725	100	0.410959	missing	missing	missing	AR_0083	missing
GCF_003006035.1	PRJNA224116	SAMN04014929	Complete Genome	REFSEQ	97.8936	100	0	missing	missing	missing	AR_0088	missing
GCF_003010675.1	PRJNA224116	SAMN04014942	Complete Genome	REFSEQ	98.0859	100	1.91781	missing	missing	missing	AR_0101	missing
GCF_003010655.1	PRJNA224116	SAMN04014943	Complete Genome	REFSEQ	98.1233	99.9813	0.609299	missing	missing	missing	AR_0102	missing
GCF_001721705.1	PRJNA224116	SAMN04018777	Complete Genome	REFSEQ	97.9912	100	0	Australia	2010	Homo sapiens	CA-17	unknown
GCF_001399655.1	PRJNA224116	SAMN04029125	Complete Genome	REFSEQ	97.968	100	0.547945	Australia	2008	Homo sapiens	D36	wound
GCF_001922205.1	PRJNA224116	SAMN04096368	Complete Genome	REFSEQ	98.1093	99.9813	1.003	USA	Not available	Homo sapiens	CMC-CR-MDR-Ab4	BAL
GCF_001922225.1	PRJNA224116	SAMN04096369	Complete Genome	REFSEQ	98.1104	99.9813	1.003	USA	Not available	Homo sapiens	CMC-MDR-Ab59	sputum
GCF_001922245.1	PRJNA224116	SAMN04096370	Complete Genome	REFSEQ	98.1095	99.9813	1.36936	USA	Not available	Homo sapiens	CMC-CR-MDR-Ab66	TA
GCF_001593425.2	PRJNA224116	SAMN04273153	Complete Genome	REFSEQ	98.0041	100	0.273973	not collected	not collected	Homo sapiens	ATCC 17978-VU	blood
GCF_001941765.1	PRJNA224116	SAMN04273154	Complete Genome	REFSEQ	98.0019	100	0.273973	not collected	not collected	Homo sapiens	AB042	lab mutation of ATCC 17978
GCF_008630895.1	PRJNA224116	SAMN04273155	Complete Genome	REFSEQ	98.012	100	0.273973	not collected	not collected	Homo sapiens	AB043	Generated in lab from ATCC 17979
GCF_001543995.1	PRJNA224116	SAMN04448797	Complete Genome	REFSEQ	98.0781	99.9732	1.003	missing	2014	Homo sapiens	YU-R612	sputum
GCF_001636235.1	PRJNA224116	SAMN04485290	Complete Genome	REFSEQ	97.9999	100	0	Mexico	2008	Homo sapiens	3207	Bronchial fluid
GCF_002116925.1	PRJNA224116	SAMN04621185	Complete Genome	REFSEQ	99.9982	99.6347	0	USA	2015	Homo sapiens	ab736	missing
GCF_001674505.2	PRJNA224116	SAMN05238571	Complete Genome	REFSEQ	98.0477	100	0	Unknown	2015	Homo sapiens	ABUH796	Unknown
GCF_001674475.2	PRJNA224116	SAMN05238628	Complete Genome	REFSEQ	98.0528	100	0	Unknown	2015	Homo sapiens	ABUH763	Unknown
GCF_001669145.2	PRJNA224116	SAMN05238672	Complete Genome	REFSEQ	98.056	99.726	0	Unknown	2015	Homo sapiens	ABUH793	Unknown
GCF_001668465.2	PRJNA224116	SAMN05238697	Complete Genome	REFSEQ	98.1405	100	0	Unknown	2015	Homo sapiens	ABUH773	Unknown
GCF_001908295.1	PRJNA224116	SAMN05362953	Complete Genome	REFSEQ	97.8759	100	0.273973	USA	1997	Unknown	LAC4	-
GCF_001806345.1	PRJNA224116	SAMN05601665	Complete Genome	REFSEQ	98.1384	99.9375	1.02175	South Korea	2015	Homo sapiens	KAB01	Bronchial
GCF_001806365.1	PRJNA224116	SAMN05601667	Complete Genome	REFSEQ	98.0914	99.9813	0.609299	South Korea	2015	Homo sapiens	KAB02	Bronchial
GCF_001806385.1	PRJNA224116	SAMN05601668	Complete Genome	REFSEQ	98.132	99.9813	0.628046	South Korea	2015	Homo sapiens	KAB03	sputum
GCF_001806405.1	PRJNA224116	SAMN05601669	Complete Genome	REFSEQ	98.1021	99.9813	1.07799	South Korea	2015	Homo sapiens	KAB04	sputum
GCF_001806445.1	PRJNA224116	SAMN05601671	Complete Genome	REFSEQ	98.0686	99.9813	0.609299	South Korea	2015	Homo sapiens	KAB06	wound
GCF_001806465.1	PRJNA224116	SAMN05601672	Complete Genome	REFSEQ	98.0839	99.9813	0.609299	South Korea	2015	Homo sapiens	KAB07	sputum
GCF_001806485.1	PRJNA224116	SAMN05601673	Complete Genome	REFSEQ	98.1095	99.9813	0.609299	South Korea	2015	Homo sapiens	KAB08	wound
GCF_002902885.1	PRJNA224116	SAMN06040401	Complete Genome	REFSEQ	98.0083	100	0.410959	USA	2016	-	ABNIH28	-
GCF_001887305.1	PRJNA224116	SAMN06046790	Complete Genome	REFSEQ	98.1045	99.9813	0.628046	China	2014	Homo sapiens	HRAB-85	sputum
GCF_001896005.1	PRJNA224116	SAMN06077191	Complete Genome	REFSEQ	97.9766	100	0.821918	Mexico	2009	Homo sapiens	AF-401	Small Colon
GCF_001895985.1	PRJNA224116	SAMN06077192	Complete Genome	REFSEQ	98.1142	99.9813	1.7904	USA	2008	Homo sapiens	AF-673	sputum
GCF_002504145.1	PRJNA224116	SAMN06099024	Complete Genome	REFSEQ	97.8899	100	0	China	2010	Homo sapiens	A1296	sputum
GCF_001902375.1	PRJNA224116	SAMN06109232	Complete Genome	REFSEQ	98.1182	99.9677	0.609299	China	2007	Homo sapiens	XDR-BJ83	medical patient
GCF_007647215.1	PRJNA224116	SAMN06211572	Complete Genome	REFSEQ	98.1558	99.9813	0.646794	China	2016	Homo sapiens	MDR-CQ	missing
GCF_003264295.1	PRJNA224116	SAMN06219545	Complete Genome	REFSEQ	98.1506	99.9813	0.628046	China	2014	Homo sapiens	XH731	sputum
GCF_002082805.1	PRJNA224116	SAMN06650238	Complete Genome	REFSEQ	97.8531	100	0	South Korea	2013	Homo sapiens	WKA02	sputum
GCF_002082785.1	PRJNA224116	SAMN06650239	Complete Genome	REFSEQ	97.8646	100	0	South Korea	2013	Homo sapiens	HWBA8	sputum
GCF_002082825.1	PRJNA224116	SAMN06650240	Complete Genome	REFSEQ	97.9165	100	0	South Korea	2013	Homo sapiens	USA15	sputum
GCF_002082725.1	PRJNA224116	SAMN06650241	Complete Genome	REFSEQ	98.0964	99.951	1.003	South Korea	2013	Homo sapiens	USA2	urine
GCF_002082745.1	PRJNA224116	SAMN06650242	Complete Genome	REFSEQ	98.0943	99.5573	0.609299	South Korea	2013	Homo sapiens	SSA6	Endotracheal aspirate
GCF_002082685.1	PRJNA224116	SAMN06650243	Complete Genome	REFSEQ	98.1234	98.7699	0.707724	South Korea	2014	Homo sapiens	15A34	Pulmonary
GCF_002082645.1	PRJNA224116	SAMN06650245	Complete Genome	REFSEQ	98.0922	98.4064	0.609299	South Korea	2013	Homo sapiens	CBA7	sputum
GCF_002082625.2	PRJNA224116	SAMN06650260	Complete Genome	REFSEQ	98.0784	99.9813	0.609299	South Korea	2013	Homo sapiens	JBA13	sputum
GCF_002082885.1	PRJNA224116	SAMN06650261	Complete Genome	REFSEQ	98.1003	99.932	0.609299	South Korea	2013	Homo sapiens	SSMA17	Bronchial washing fluid
GCF_002082845.1	PRJNA224116	SAMN06650262	Complete Genome	REFSEQ	98.1085	99.9813	0.609299	South Korea	2013	Homo sapiens	SAA14	blood
GCF_002082865.1	PRJNA224116	SAMN06650263	Complete Genome	REFSEQ	98.0877	99.9813	0.609299	South Korea	2013	Homo sapiens	SSA12	blood
GCF_002082705.1	PRJNA224116	SAMN06650264	Complete Genome	REFSEQ	98.0609	99.8197	0.609299	South Korea	2013	Homo sapiens	15A5	Pulmonary
GCF_002210065.1	PRJNA224116	SAMN07125723	Complete Genome	REFSEQ	97.871	100	0.273973	Australia	2003	Homo sapiens	A85	sputum
GCF_003264255.1	PRJNA224116	SAMN07135563	Complete Genome	REFSEQ	98.1518	99.9813	0.628046	China	2017	-	XH731	-
GCF_003264275.1	PRJNA224116	SAMN07135565	Complete Genome	REFSEQ	98.11	99.9813	0.609299	China	2017	-	XH386	-
GCF_003931755.1	PRJNA224116	SAMN07258640	Complete Genome	REFSEQ	98.1253	99.5876	1.003	Canada	2016	Homo sapiens	-	Not applicable
GCF_003931775.1	PRJNA224116	SAMN07258642	Complete Genome	REFSEQ	98.1262	99.5876	1.003	Canada	2016	Homo sapiens	-	Not applicable
GCF_004101745.1	PRJNA224116	SAMN07258645	Complete Genome	REFSEQ	98.1015	99.1223	2.5778	Canada	2012	Homo sapiens	11A1213CRGN008	Not applicable
GCF_004101725.1	PRJNA224116	SAMN07258647	Complete Genome	REFSEQ	98.1035	99.9813	2.9715	Canada	2012	Homo sapiens	11A1213CRGN055	Not applicable
GCF_008244865.1	PRJNA224116	SAMN07258648	Complete Genome	REFSEQ	98.1036	99.9813	2.9715	Canada	2012	Homo sapiens	11A1213CRGN064	Not applicable
GCF_004101685.1	PRJNA224116	SAMN07258672	Complete Genome	REFSEQ	98.1033	99.9813	2.9715	Canada	2013	Homo sapiens	11A1314CRGN088	Not applicable
GCF_008244905.1	PRJNA224116	SAMN07258673	Complete Genome	REFSEQ	98.1036	99.9813	2.9715	Canada	2013	Homo sapiens	11A1314CRGN089	Not applicable
GCF_008244885.1	PRJNA224116	SAMN07258679	Complete Genome	REFSEQ	98.1028	99.9813	2.9715	Canada	2013	Homo sapiens	N13-03449	Not applicable
GCF_004101705.1	PRJNA224116	SAMN07258689	Complete Genome	REFSEQ	98.1047	99.9813	3.3652	Canada	2014	Homo sapiens	11A14CRGN003	Not applicable
GCF_003516005.1	PRJNA224116	SAMN07284119	Complete Genome	REFSEQ	98.1145	99.9813	2.1841	Mexico	2008	Homo sapiens	7847	blood
GCF_003431385.1	PRJNA224116	SAMN07289440	Complete Genome	REFSEQ	97.888	99.863	0	Mexico	2006	Homo sapiens	7804	bronchoalveolar lavage fluid
GCF_002761575.1	PRJNA224116	SAMN07445112	Complete Genome	REFSEQ	98.0825	99.9813	0.619939	Australia	2013	Homo sapiens	AYP-A2	wound
GCF_003522885.1	PRJNA224116	SAMN07520231	Complete Genome	REFSEQ	98.1014	99.9813	0.609299	Mexico	2009	Homo sapiens	5845	wound
GCF_003522845.1	PRJNA224116	SAMN07520232	Complete Genome	REFSEQ	97.8668	100	0	Mexico	2010	Homo sapiens	9102	Bronchial fluid
GCF_003522785.1	PRJNA224116	SAMN07520233	Complete Genome	REFSEQ	98.1008	99.9813	0.921544	Mexico	2011	Homo sapiens	10042	Secretion
GCF_009497995.1	PRJNA224116	SAMN07520235	Complete Genome	REFSEQ	98.0289	100	0	Mexico	2007	Homo sapiens	7835	Tissue
GCF_003522665.1	PRJNA224116	SAMN07520236	Complete Genome	REFSEQ	97.929	100	0.0913242	Mexico	2013	Homo sapiens	9201	blood
GCF_003522705.1	PRJNA224116	SAMN07520237	Complete Genome	REFSEQ	97.8659	100	0	Mexico	2012	Homo sapiens	10324	Bronchial fluid
GCF_003345235.1	PRJNA224116	SAMN07559626	Complete Genome	REFSEQ	98.0125	100	0.821918	Mexico	2015	Homo sapiens	810CP	feces
GCF_003591615.1	PRJNA224116	SAMN07580891	Complete Genome	REFSEQ	98.0293	99.9813	0.619939	China	2016	Homo sapiens	XH906	blood
GCF_002741415.1	PRJNA224116	SAMN07736509	Complete Genome	REFSEQ	97.9334	100	0	Greece	2002	Homo sapiens	A388	not recorded
GCF_002762115.1	PRJNA224116	SAMN07943353	Complete Genome	REFSEQ	98.0931	99.932	0.609299	China	2011	Homo sapiens	Ab4568	sputum
GCF_002762155.1	PRJNA224116	SAMN07943354	Complete Genome	REFSEQ	98.0922	99.9813	0.609299	China	2011	Homo sapiens	Ab4653	sputum
GCF_002762095.1	PRJNA224116	SAMN07943355	Complete Genome	REFSEQ	98.0929	99.9813	0.609299	China	2011	Homo sapiens	Ab4977	sputum
GCF_002753915.1	PRJNA224116	SAMN07945345	Complete Genome	REFSEQ	98.1143	99.9813	1.57293	Pakistan	2012	Ovis aries	AbPK1	sheep brocho-alveolar lavage
GCF_002843665.1	PRJNA224116	SAMN08054861	Complete Genome	REFSEQ	98.076	99.9813	0.609299	South Korea	2012	Homo sapiens	-	Blood, Central line
GCF_002999195.2	PRJNA224116	SAMN08364584	Complete Genome	REFSEQ	97.8834	100	0.136986	China	Missing	Homo sapiens	WCHAB005078	-
GCF_002950495.2	PRJNA224116	SAMN08364585	Complete Genome	REFSEQ	98.1244	99.9813	0.609299	China	Missing	Homo sapiens	WCHAB005133	-
GCF_004194555.1	PRJNA224116	SAMN08513260	Complete Genome	REFSEQ	97.996	99.726	0	USA	1943	Parthenium argentatum Gray (guayule shrubs)	NCIMB 8209	aerobic microbial decomposition of whole and defoliated guayule (retting)
GCF_015910475.1	PRJNA224116	SAMN08687991	Complete Genome	REFSEQ	99.6962	100	0	USA	2016	Homo sapiens	ATCC 17961	blood
GCF_003181015.1	PRJNA224116	SAMN09241862	Complete Genome	REFSEQ	98.053	99.9813	0.740532	Spain	unknown	Homo sapiens	DA33098	-
GCF_009455505.1	PRJNA224116	SAMN09244200	Complete Genome	REFSEQ	98.0769	99.5438	1.02175	India	-	Homo sapiens	6507	-
GCF_024732425.1	PRJNA224116	SAMN09244924	Complete Genome	REFSEQ	98.1185	100	0	Greece	1997	Homo sapiens	LUH 6011	unknown
GCF_005519135.2	PRJNA224116	SAMN09302593	Complete Genome	REFSEQ	98.1481	99.9813	0.609299	Italy	2005	Homo sapiens	ACICU	cerebrospinal fluid
GCF_003288775.1	PRJNA224116	SAMN09389171	Complete Genome	REFSEQ	98.1514	99.9813	0.628046	China	2016	Homo sapiens	Aba	-
GCF_003296225.1	PRJNA224116	SAMN09460321	Complete Genome	REFSEQ	97.9242	100	0	Germany	Unknown	Homo sapiens	DA33382	Tracheal secretion
GCF_004136355.1	PRJNA224116	SAMN09769497	Complete Genome	REFSEQ	98.1527	99.9813	0.609299	USA	2012	Homo sapiens	MDR-UNC	right leg muscle, right leg fascia, central venous catheter, dialysis catheter, surface of the left leg ulcer, and left lower leg
GCF_008807055.1	PRJNA224116	SAMN10135127	Complete Genome	REFSEQ	98.1505	99.9813	0.628046	China	2015	Homo sapiens	C25	cerebral-spinal fluid
GCF_003812385.1	PRJNA224116	SAMN10163228	Complete Genome	REFSEQ	97.9829	100	0	not applicable	2016	Homo sapiens	FDAARGOS_533	sputum
GCF_026167785.1	PRJNA224116	SAMN10245912	Complete Genome	REFSEQ	97.9887	100	0.273973	missing	missing	missing	ATCC 17978	missing
GCF_003949115.2	PRJNA224116	SAMN10261535	Complete Genome	REFSEQ	98.0352	100	0	USA	2012	Homo sapiens	TG31302	trach asp
GCF_003949725.2	PRJNA224116	SAMN10261537	Complete Genome	REFSEQ	98.0374	100	0	USA	2012	Homo sapiens	TG29392	blood
GCF_003949595.2	PRJNA224116	SAMN10261544	Complete Genome	REFSEQ	98.1193	99.9813	0.609299	USA	2011	Homo sapiens	TG22182	trach asp
GCF_003948535.2	PRJNA224116	SAMN10261584	Complete Genome	REFSEQ	98.1172	99.9813	0.609299	USA	2011	Homo sapiens	TG22627	trach asp
GCF_003948455.2	PRJNA224116	SAMN10261589	Complete Genome	REFSEQ	98.1185	99.5876	1.3967	USA	2011	Homo sapiens	TG22653	BAL
GCF_003948085.2	PRJNA224116	SAMN10261613	Complete Genome	REFSEQ	98.0342	100	0	USA	2012	Homo sapiens	TG31986	trach asp
GCF_004564115.1	PRJNA224116	SAMN10386508	Complete Genome	REFSEQ	97.9444	100	0.678408	Czech Republic	2018	Homo sapiens	39741	missing
GCF_004564095.1	PRJNA224116	SAMN10386510	Complete Genome	REFSEQ	97.9443	100	0.0391389	Czech Republic	2018	-	LEV1449/17Ec	missing
GCF_003812485.1	PRJNA224116	SAMN10411605	Complete Genome	REFSEQ	97.9808	100	1.23288	Brazil	2008	Homo sapiens	MRSN15313	cerebrospinal fluid
GCF_027558855.1	PRJNA224116	SAMN10411726	Complete Genome	REFSEQ	97.943	100	0.958904	USA	2018	Homo sapiens	WU_164	urine
GCF_004028375.1	PRJNA224116	SAMN10441121	Complete Genome	REFSEQ	97.9573	100	0	China	2015	Homo sapiens	A52	sputum
GCF_004758865.1	PRJNA224116	SAMN11298775	Complete Genome	REFSEQ	97.8452	100	0.547945	India	2018	Homo sapiens	CIAT758	blood
GCF_004797155.2	PRJNA224116	SAMN11304550	Complete Genome	REFSEQ	98.0047	100	0.273973	South Korea	2018	-	ATCC 17978	missing
GCF_004768705.1	PRJNA224116	SAMN11311113	Complete Genome	REFSEQ	97.8951	100	0.410959	India	2018	Homosapiens	ACN21	blood
GCF_005280435.1	PRJNA224116	SAMN11557458	Complete Genome	REFSEQ	97.9283	100	0	India	2019	Homo sapiens	VB16141	blood
GCF_005280675.1	PRJNA224116	SAMN11571814	Complete Genome	REFSEQ	98.0006	100	1.36986	India	2019	Homosapiens	SP304	sputum
GCF_005280695.1	PRJNA224116	SAMN11571816	Complete Genome	REFSEQ	98.0912	99.9375	0.628046	India	2018	Homosapiens	VB33071	blood
GCF_005518095.1	PRJNA224116	SAMN11621520	Complete Genome	REFSEQ	97.8464	100	0	India	2018	Homo sapiens	P7774	Pus
GCF_005671375.1	PRJNA224116	SAMN11660471	Complete Genome	REFSEQ	98.1324	99.9813	0.609299	USA	2016	Homo sapiens	PB364	missing
GCF_025402915.1	PRJNA224116	SAMN11997569	Complete Genome	REFSEQ	98.1026	99.9813	0.609299	China	2012	Homo sapiens	37662	sputum of an intensive care unit patient at Meizhou People's Hospital
GCF_028464025.1	PRJNA224116	SAMN11997570	Complete Genome	REFSEQ	98.1008	99.8828	1.19985	China	2016	-	37662RM1	selected with meropenem showing different genome comparing to wild type (37662WT)
GCF_028464005.1	PRJNA224116	SAMN11997571	Complete Genome	REFSEQ	98.0977	99.9484	1.19985	China	2016	-	37662RM2	selected with meropenem showing different genome comparing to wild type (37662WT)
GCF_006385075.1	PRJNA224116	SAMN12015779	Complete Genome	REFSEQ	97.9067	100	0	United Kingdom	2015	Homo sapiens	11W359501	missing
GCF_007221455.1	PRJNA224116	SAMN12045486	Complete Genome	REFSEQ	98.1005	99.9813	0.609299	Netherlands	1982	Homo sapiens	A320 (RUH134)	unknown
GCF_012974845.1	PRJNA224116	SAMN12057668	Complete Genome	REFSEQ	98.1159	99.1939	0.609299	Thailand	2017	Canis lupus familiaris	CUVET-MIC596	urine
GCF_007107525.1	PRJNA224116	SAMN12158047	Complete Genome	REFSEQ	97.8866	100	0	Australia	1999	Homo sapiens	J9	unknown
GCF_030585325.1	PRJNA224116	SAMN12286998	Complete Genome	REFSEQ	98.0319	99.9813	0.619939	USA	2018	Homo sapiens	18WIARLN0021	Skin/Wound
GCF_030585285.1	PRJNA224116	SAMN12287002	Complete Genome	REFSEQ	98.0342	99.9813	1.80104	USA	2018	Homo sapiens	18WIARLN0023	Skin/Wound
GCF_030585265.1	PRJNA224116	SAMN12287004	Complete Genome	REFSEQ	97.9039	100	0	USA	2018	Homo sapiens	18WIARLN0024	Skin/Wound
GCF_030585245.1	PRJNA224116	SAMN12287006	Complete Genome	REFSEQ	98.0212	99.9813	1.35014	USA	2018	Homo sapiens	18WIARLN0025	Skin/Wound
GCF_030585225.1	PRJNA224116	SAMN12287008	Complete Genome	REFSEQ	98.0288	99.8828	1.31985	USA	2018	Homo sapiens	18WIARLN0035	Skin/Wound
GCF_008931365.1	PRJNA224116	SAMN12289292	Complete Genome	REFSEQ	97.9216	100	0.228311	Australia	2013	-	E47	Room 7
GCF_009035845.1	PRJNA224116	SAMN12389466	Complete Genome	REFSEQ	99.9972	99.6347	0	USA	1948	Homo sapiens	ATCC 19606	urine
GCF_014705865.1	PRJNA224116	SAMN12391534	Complete Genome	REFSEQ	98.1205	99.9813	0.609299	USA	2004	Homo sapiens	CFSAN093707	sterile body site
GCF_014705845.1	PRJNA224116	SAMN12391535	Complete Genome	REFSEQ	98.0616	99.9813	0.619939	USA	2005	Homo sapiens	CFSAN093706	blood
GCF_014705885.1	PRJNA224116	SAMN12391536	Complete Genome	REFSEQ	98.0617	99.9813	0.619939	USA	2004	Homo sapiens	CFSAN093708	wound
GCF_014705825.1	PRJNA224116	SAMN12391537	Complete Genome	REFSEQ	98.099	99.9813	0.866002	USA	2009	-	CFSAN093705	urine
GCF_014705805.1	PRJNA224116	SAMN12391854	Complete Genome	REFSEQ	98.0614	99.9813	0.619939	USA	2005	Homo sapiens	CFSAN093710	sterile body site
GCF_008033255.2	PRJNA224116	SAMN12399660	Complete Genome	REFSEQ	98.1252	99.9087	0.547945	USA	2008	Homo sapiens	ATCC BAA-1790	sputum
GCF_014705785.1	PRJNA224116	SAMN12413929	Complete Genome	REFSEQ	98.0859	99.9813	0.619939	USA	2007	-	CFSAN093709	urine
GCF_009498335.1	PRJNA224116	SAMN12569102	Complete Genome	REFSEQ	98.0642	99.8828	0.628046	Thailand	2019	Homo sapiens	ABCR01	sputum
GCF_008124045.1	PRJNA224116	SAMN12603273	Complete Genome	REFSEQ	97.9846	100	0.410959	missing	2018	-	PG20180064	mouse gut
GCF_008632635.1	PRJNA224116	SAMN12769618	Complete Genome	REFSEQ	98.0482	100	0	Malaysia	2017	-	K09-14	soil
GCF_013394285.1	PRJNA224116	SAMN12859885	Complete Genome	REFSEQ	97.899	100	0.136986	China	2017	duck	29FS20	feces
GCF_013394265.1	PRJNA224116	SAMN12860376	Complete Genome	REFSEQ	97.9493	100	0	China	2017	duck	31FS3-2	feces
GCF_009759685.1	PRJNA224116	SAMN13045090	Complete Genome	REFSEQ	100	99.6347	0	Australia	2017	Homo sapiens	ATCC 19606	missing
GCF_023981045.1	PRJNA224116	SAMN13150932	Complete Genome	REFSEQ	97.9516	100	0	China	2010	Homo sapiens	XH1056	sputum
GCF_009740145.1	PRJNA224116	SAMN13476302	Complete Genome	REFSEQ	98.0405	100	0	China	2018	-	XL380	cucumber rhizosphere
GCF_030585385.1	PRJNA224116	SAMN13480520	Complete Genome	REFSEQ	97.904	100	0	USA	2019	Homo sapiens	19WIARLN011_full	Skin/Wound
GCF_030585405.1	PRJNA224116	SAMN13480521	Complete Genome	REFSEQ	97.9072	100	0	USA	2019	Homo sapiens	19WIARLN021_full	Skin/Wound
GCF_030585365.1	PRJNA224116	SAMN13480522	Complete Genome	REFSEQ	97.9175	100	0	USA	2019	Homo sapiens	19WIARLN022_full	Skin/Wound
GCF_030585345.1	PRJNA224116	SAMN13480523	Complete Genome	REFSEQ	97.9052	100	0	USA	2019	Homo sapiens	19WIARLN023_full	Skin/Wound
GCF_013377175.1	PRJNA224116	SAMN13565236	Complete Genome	REFSEQ	98.0845	100	0	China	2010	Homo sapiens	A1429	secretion
GCF_018808925.1	PRJNA224116	SAMN13874777	Complete Genome	REFSEQ	97.8879	100	0.410959	Australia	2006	Homo sapiens	D4	wound
GCF_018831125.1	PRJNA224116	SAMN13874778	Complete Genome	REFSEQ	97.899	100	0.136986	Australia	2010	Homo sapiens	D46	mid stream urine
GCF_014322245.1	PRJNA224116	SAMN13884837	Complete Genome	REFSEQ	97.7999	100	0.136986	China	2019	Homo sapiens	DETAB-P2	rectal swab
GCF_012974585.1	PRJNA224116	SAMN14072279	Complete Genome	REFSEQ	97.8756	100	0.547945	China	2017	Duck	ABF9692	trachea
GCF_022870045.1	PRJNA224116	SAMN14078800	Complete Genome	REFSEQ	99.9982	99.6347	0	missing	missing	missing	PartI-Abaumannii-RM8376	missing
GCF_018831485.1	PRJNA224116	SAMN14149265	Complete Genome	REFSEQ	97.9316	100	2.19178	Lebanon	2012	-	Ex003	Water (artesian well)
GCF_018831465.1	PRJNA224116	SAMN14149266	Complete Genome	REFSEQ	97.9116	100	0	Lebanon	2015	-	Ax270	Animal (cat)
GCF_011067065.1	PRJNA224116	SAMN14217790	Complete Genome	REFSEQ	98.0934	99.5385	0.707724	South Korea	2011	Homo sapiens	ATCC 17978	urine
GCF_020810655.1	PRJNA224116	SAMN14226727	Complete Genome	REFSEQ	97.8295	100	1.36986	-	-	-	RCH52	-
GCF_012272795.1	PRJNA224116	SAMN14308849	Complete Genome	REFSEQ	98.1168	99.9813	0.628046	China	2017	Homo sapiens	DT-Ab003	stethoscope
GCF_012272775.1	PRJNA224116	SAMN14308853	Complete Genome	REFSEQ	98.115	99.5876	0.609299	China	2017	Homo sapiens	DT-Ab007	sputum
GCF_012272755.1	PRJNA224116	SAMN14308864	Complete Genome	REFSEQ	98.1148	99.9813	0.628046	China	2018	Homo sapiens	DT-Ab020	sputum
GCF_012272735.1	PRJNA224116	SAMN14308866	Complete Genome	REFSEQ	98.1127	99.9813	0.609299	China	2017	Homo sapiens	DT-Ab022	sputum
GCF_012272715.1	PRJNA224116	SAMN14308892	Complete Genome	REFSEQ	98.1166	99.9813	0.609299	China	2019	Homo sapiens	DT-Ab057	Bronchoalveolar lavage fluid
GCF_012934905.1	PRJNA224116	SAMN14409516	Complete Genome	REFSEQ	97.8613	100	0	India	2019	Homo sapiens	VB82	blood
GCF_012934925.1	PRJNA224116	SAMN14409628	Complete Genome	REFSEQ	98.1479	99.4891	1.51856	India	2019	Homo sapiens	VB473	sputum
GCF_012934945.1	PRJNA224116	SAMN14409813	Complete Genome	REFSEQ	98.152	99.9813	0.628046	India	2019	Homo sapiens	VB723	blood
GCF_012934965.1	PRJNA224116	SAMN14410107	Complete Genome	REFSEQ	98.1239	99.9813	0.628046	India	2019	Homo sapiens	VB11737	blood
GCF_012935145.1	PRJNA224116	SAMN14410111	Complete Genome	REFSEQ	98.1041	99.9813	1.53214	India	2019	Homo sapiens	VB7036	blood
GCF_012934985.1	PRJNA224116	SAMN14410138	Complete Genome	REFSEQ	98.0984	99.9813	0.649919	India	2019	Homo sapiens	VB2181	sputum
GCF_012935165.1	PRJNA224116	SAMN14414747	Complete Genome	REFSEQ	98.1375	99.9813	0.628046	India	2019	Homo sapiens	VB2139	sputum
GCF_012935005.1	PRJNA224116	SAMN14414761	Complete Genome	REFSEQ	97.9008	100	0.136986	India	2019	Homo sapiens	VB2486	sputum
GCF_012935185.1	PRJNA224116	SAMN14414778	Complete Genome	REFSEQ	98.1294	99.925	0.628046	India	2019	Homo sapiens	VB2107	sputum
GCF_012935025.1	PRJNA224116	SAMN14415334	Complete Genome	REFSEQ	98.1382	99.9813	0.628046	India	2019	Homo sapiens	VB2200	sputum
GCF_012935045.1	PRJNA224116	SAMN14420246	Complete Genome	REFSEQ	98.147	99.9813	0.628046	India	2019	Homo sapiens	PM1912235	Pus
GCF_012935065.1	PRJNA224116	SAMN14420253	Complete Genome	REFSEQ	98.1128	99.9813	0.628046	India	2019	Homo sapiens	PM192696	sputum
GCF_012935085.1	PRJNA224116	SAMN14420254	Complete Genome	REFSEQ	97.8629	100	0.684932	India	2019	Homo sapiens	PM193665	Pus
GCF_012935105.1	PRJNA224116	SAMN14420255	Complete Genome	REFSEQ	97.8719	100	0.684932	India	2019	Homo sapiens	PM194188	BAL
GCF_012935125.1	PRJNA224116	SAMN14422682	Complete Genome	REFSEQ	97.8526	100	0.547945	India	2019	Homo sapiens	PM194229	BAL
GCF_012931645.1	PRJNA224116	SAMN14667515	Complete Genome	REFSEQ	97.9101	100	0.136986	Ghana	2016	Homo sapiens	Ab-B004d-c	sputum
GCF_012931625.1	PRJNA224116	SAMN14667516	Complete Genome	REFSEQ	97.9128	100	0.136986	Ghana	2016	Homo sapiens	Ab-D10a-a	cerebrospinal fluid
GCF_012931665.1	PRJNA224116	SAMN14667517	Complete Genome	REFSEQ	97.8397	100	0.136986	Ghana	2016	Homo sapiens	Ab-C63	sputum
GCF_012931605.1	PRJNA224116	SAMN14667518	Complete Genome	REFSEQ	97.9974	100	0	Ghana	2016	Homo sapiens	Ab-C102	blood
GCF_045678795.1	PRJNA224116	SAMN14752945	Complete Genome	REFSEQ	98.1074	99.9813	0.609299	China	2018	Homo sapiens	abYQ4	sputum
GCF_013372085.1	PRJNA224116	SAMN14779651	Complete Genome	REFSEQ	98.0038	100	0.410959	USA	2017	Homo sapiens	ATCC 17978	-
GCF_013416255.1	PRJNA224116	SAMN14833494	Complete Genome	REFSEQ	97.9737	100	0.547945	Tanzania	2017	Homo sapiens	DT0544C	missing
GCF_013416275.1	PRJNA224116	SAMN14833556	Complete Genome	REFSEQ	97.9866	100	0.136986	Tanzania	2017	Homo sapiens	DT01139C	missing
GCF_013305465.1	PRJNA224116	SAMN14859482	Complete Genome	REFSEQ	98.1239	99.7844	2.53093	Australia	2016	Homo sapiens	MS14413	Urine (catheter)
GCF_021559695.1	PRJNA224116	SAMN15097904	Complete Genome	REFSEQ	98.1154	99.9813	0.628046	China	2018	Homo sapiens	AB79	Eye secretion
GCF_019331655.1	PRJNA224116	SAMN15099408	Complete Genome	REFSEQ	99.9979	99.6347	0	Italy	2014	Homo sapiens	ATCC 19606	-
GCF_021729465.1	PRJNA224116	SAMN15182649	Complete Genome	REFSEQ	97.9218	100	0.136986	China	2019	Duck	YC103	stool
GCF_013376855.2	PRJNA224116	SAMN15344688	Complete Genome	REFSEQ	98.0952	99.9813	0.449944	USA	2016	Homo sapiens	TP1	human clinical sample
GCF_022369275.1	PRJNA224116	SAMN15438232	Complete Genome	REFSEQ	97.844	100	0.342466	China	2018	-	M164-3	Manis javanica
GCF_016864295.1	PRJNA224116	SAMN15501054	Complete Genome	REFSEQ	98.0282	100	0	France	2015	Homo sapiens	AbCTX1	Throat sample
GCF_016864315.2	PRJNA224116	SAMN15501056	Complete Genome	REFSEQ	98.0456	100	0.0684932	France	2017	Homo sapiens	AbCTX9	bronchoalveolar lavage
GCF_016864915.1	PRJNA224116	SAMN15501316	Complete Genome	REFSEQ	97.8832	99.863	0.273973	France	2017	Homo sapiens	AbCTX13	Peritoneal fluid
GCF_014672775.1	PRJNA224116	SAMN15507625	Complete Genome	REFSEQ	98.0032	100	0.273973	unknown	unknown	unknown	ATCC 17978	unknown
GCF_014672735.1	PRJNA224116	SAMN15507634	Complete Genome	REFSEQ	98.0785	100	0.273973	unknown	1995	Homo sapiens	A118	blood culture
GCF_014672755.1	PRJNA224116	SAMN15507635	Complete Genome	REFSEQ	99.9977	99.6347	0	unknown	unknown	unknown	ATCC 19606	unknown
GCF_017098265.2	PRJNA224116	SAMN15538696	Complete Genome	REFSEQ	98.0916	99.9025	0.628046	China	2018	Homo sapiens	2018HLJAB1	pus
GCF_017098205.2	PRJNA224116	SAMN15538700	Complete Genome	REFSEQ	98.1066	99.9813	0.628046	China	2014	Homo sapiens	2014BJAB1	blood
GCF_017096385.2	PRJNA224116	SAMN15538701	Complete Genome	REFSEQ	98.1554	99.1939	0.628046	China	2016	Homo sapiens	2016LNAB1	cerebrospinal fluid
GCF_017096425.2	PRJNA224116	SAMN15538702	Complete Genome	REFSEQ	98.1183	99.856	0.628046	China	2014	Homo sapiens	2014LNAB1	blood
GCF_013787185.1	PRJNA224116	SAMN15541804	Complete Genome	REFSEQ	98.0989	100	0.0913242	Russia	2013	Homo sapiens	36-1512	respiratory tract
GCF_014874575.1	PRJNA224116	SAMN15574350	Complete Genome	REFSEQ	97.7817	100	0.410959	Malaysia	2016	Homo sapiens	AC1633	blood
GCF_022369355.1	PRJNA224116	SAMN15589941	Complete Genome	REFSEQ	99.8862	100	0.205479	China	2018	-	M175-3	Manis javanica
GCF_019903215.1	PRJNA224116	SAMN15646561	Complete Genome	REFSEQ	98.1069	99.9813	0.609299	France	na	-	B9	Seine River
GCF_019903195.1	PRJNA224116	SAMN15646562	Complete Genome	REFSEQ	98.0785	100	0.273973	USA	na	-	10_3	field soil
GCF_019903175.1	PRJNA224116	SAMN15646563	Complete Genome	REFSEQ	98.0771	100	0.273973	USA	na	-	10_4	field soil
GCF_019903155.1	PRJNA224116	SAMN15646564	Complete Genome	REFSEQ	97.9944	100	0	Finland	na	-	E-011922	paper mill kaolin
GCF_015870765.1	PRJNA224116	SAMN15735522	Complete Genome	REFSEQ	98.0959	99.9813	0.449944	USA	2016	Homo sapiens	TP2	human clinical sample
GCF_015870965.1	PRJNA224116	SAMN15738014	Complete Genome	REFSEQ	98.0967	99.5876	0.056243	USA	2016	Homo sapiens	TP3	human clinical sample
GCF_015732435.1	PRJNA224116	SAMN15778733	Complete Genome	REFSEQ	98.128	99.9813	0.628046	China	2018	Homo sapiens	abA1	bronchial
GCF_014267385.1	PRJNA224116	SAMN15819058	Complete Genome	REFSEQ	98.113	99.9813	0.628046	China	2018	-	XYAB2018	blood
GCF_019076685.1	PRJNA224116	SAMN15929419	Complete Genome	REFSEQ	97.9406	100	0	Malaysia	2018	Homo sapiens	CAb-65	Faecal
GCF_015571935.1	PRJNA224116	SAMN16304032	Complete Genome	REFSEQ	97.9674	100	0	Canada	2018	Sus scrofa domesticus	Res13-Abat-PEA21-P4-01-A	swab
GCF_016127515.1	PRJNA224116	SAMN16357205	Complete Genome	REFSEQ	97.8713	100	0	USA	Unknown	missing	FDAARGOS_1036	missing
GCF_016903215.1	PRJNA224116	SAMN16357501	Complete Genome	REFSEQ	98.1338	99.9813	0.628046	USA	Unknown	missing	FDAARGOS_1359	missing
GCF_016903135.1	PRJNA224116	SAMN16357502	Complete Genome	REFSEQ	98.09	99.726	0	USA	Unknown	missing	FDAARGOS_1360	missing
GCF_029814975.1	PRJNA224116	SAMN16560991	Complete Genome	REFSEQ	98.1064	99.9813	1.05076	Taiwan	2020	Homo sapiens	X4-65	not available
GCF_029774295.1	PRJNA224116	SAMN16560992	Complete Genome	REFSEQ	98.106	99.9813	1.05076	Taiwan	2020	Homo sapiens	X4-107	not available
GCF_029774275.1	PRJNA224116	SAMN16560993	Complete Genome	REFSEQ	98.1064	99.9813	1.05076	Taiwan	2020	Homo sapiens	X4-136	not available
GCF_029774235.1	PRJNA224116	SAMN16560994	Complete Genome	REFSEQ	98.1062	99.9813	1.05076	Taiwan	2020	Homo sapiens	X4-300	not available
GCF_022811905.1	PRJNA224116	SAMN16714580	Complete Genome	REFSEQ	97.8999	100	0.136986	China	2016	Homo sapiens	2016GDAB1	balf
GCF_016350085.1	PRJNA224116	SAMN17073615	Complete Genome	REFSEQ	98.0812	99.9813	0.658511	South Korea	2020	Homo sapiens	G20AB007	blood
GCF_016350105.1	PRJNA224116	SAMN17073616	Complete Genome	REFSEQ	98.0817	99.9813	0.609299	South Korea	2020	Homo sapiens	G20AB009	blood
GCF_016350065.1	PRJNA224116	SAMN17073617	Complete Genome	REFSEQ	98.0809	99.9813	0.609299	South Korea	2020	Homo sapiens	G20AB010	blood
GCF_016350005.1	PRJNA224116	SAMN17073618	Complete Genome	REFSEQ	98.0842	99.9813	0.609299	South Korea	2020	Homo sapiens	G20AB011	blood
GCF_016919505.2	PRJNA224116	SAMN17898087	Complete Genome	REFSEQ	97.8953	100	0.136986	Belgium	2008	Homo sapiens	AB5075-VUB	-
GCF_016919525.1	PRJNA224116	SAMN17898088	Complete Genome	REFSEQ	97.8919	100	0.136986	Belgium	2008	Homo sapiens	AB5075-VUB-itrA::ISAba13	-
GCF_018604365.1	PRJNA224116	SAMN18202092	Complete Genome	REFSEQ	98.0466	98.8001	0.628046	Lebanon	2017	Homo sapiens	Cl415	blood
GCF_017639875.1	PRJNA224116	SAMN18396008	Complete Genome	REFSEQ	97.9807	99.4521	0.273973	India	2020	Homo sapiens	KSK1	Respiratory specimen
GCF_017742855.1	PRJNA224116	SAMN18451305	Complete Genome	REFSEQ	97.9838	100	0.410959	India	2020	Homo sapiens	KSK2	Respiratory specimen
GCF_017723975.1	PRJNA224116	SAMN18452234	Complete Genome	REFSEQ	97.9836	100	0.410959	India	2020	Homo sapiens	KSK6	Respiratory specimen
GCF_017724115.1	PRJNA224116	SAMN18452334	Complete Genome	REFSEQ	97.9838	100	0.410959	India	2020	Homo sapiens	KSK7	Respiratory specimen
GCF_017724155.1	PRJNA224116	SAMN18452342	Complete Genome	REFSEQ	97.984	100	0.410959	India	2020	Homo sapiens	KSK10	Respiratory specimen
GCF_017724195.1	PRJNA224116	SAMN18452659	Complete Genome	REFSEQ	97.9837	100	0.410959	India	2020	Homo sapiens	KSK11	Respiratory specimen
GCF_017724215.1	PRJNA224116	SAMN18452698	Complete Genome	REFSEQ	97.9837	100	0.410959	India	2020	Homo sapiens	KSK18	Respiratory specimen
GCF_017726495.1	PRJNA224116	SAMN18452699	Complete Genome	REFSEQ	97.9837	100	0.410959	India	2020	Homo sapiens	KSK19	Respiratory specimen
GCF_017726555.1	PRJNA224116	SAMN18452712	Complete Genome	REFSEQ	97.9842	100	0.410959	India	2020	Homo sapiens	KSK20	Respiratory specimen
GCF_017726575.1	PRJNA224116	SAMN18452713	Complete Genome	REFSEQ	97.9474	100	0.273973	India	2020	Homo sapiens	KSK Sensitive	Respiratory specimen
GCF_017753625.1	PRJNA224116	SAMN18498586	Complete Genome	REFSEQ	97.9217	100	0.273973	China	2019	-	DETAB-E227	missing
GCF_018135585.1	PRJNA224116	SAMN18498587	Complete Genome	REFSEQ	97.9135	99.863	0	China	2019	Homo sapiens	DETAB-P39	patient
GCF_018454385.1	PRJNA224116	SAMN19073634	Complete Genome	REFSEQ	98.1185	99.5876	0.609299	China	2021	Homo sapiens	DD520	hospital
GCF_020911985.1	PRJNA224116	SAMN19110717	Complete Genome	REFSEQ	99.9978	99.6347	0	not applicable	2020	-	ATCC 19606	-
GCF_020912005.1	PRJNA224116	SAMN19110862	Complete Genome	REFSEQ	97.9886	100	0.547945	not applicable	2020	-	ATCC 17978	-
GCF_024139095.1	PRJNA224116	SAMN19356522	Complete Genome	REFSEQ	97.9282	100	0	Chile	2011	Homo sapiens	UC22850	catheter tip
GCF_024139075.1	PRJNA224116	SAMN19356530	Complete Genome	REFSEQ	97.9687	100	0	Chile	2011	Homo sapiens	UC24137	sacrum ulcer
GCF_024139055.1	PRJNA224116	SAMN19356533	Complete Genome	REFSEQ	97.9699	100	0	Chile	2010	Homo sapiens	UC21460	tissue
GCF_024139035.1	PRJNA224116	SAMN19356535	Complete Genome	REFSEQ	98.0016	100	0.958904	Chile	2011	Homo sapiens	UC23022	blood culture
GCF_024139015.1	PRJNA224116	SAMN19356540	Complete Genome	REFSEQ	97.9467	100	0.547945	Chile	2010	Homo sapiens	UC20804	peritoneal abcess
GCF_024138435.1	PRJNA224116	SAMN19356554	Complete Genome	REFSEQ	97.9401	100	0	Chile	2011	Homo sapiens	UC24371	endotracheal aspirate
GCF_024271825.1	PRJNA224116	SAMN19356555	Complete Genome	REFSEQ	97.9943	100	0	Chile	2012	Homo sapiens	UC25604	peritoneal liquid
GCF_029774315.1	PRJNA224116	SAMN19690115	Complete Genome	REFSEQ	98.1098	99.9813	1.05076	Taiwan	2020	Homo sapiens	X4-201	blood
GCF_029774335.1	PRJNA224116	SAMN19690116	Complete Genome	REFSEQ	98.1067	99.9813	1.05076	Taiwan	2020	Homo sapiens	X4-584	urine
GCF_029774355.1	PRJNA224116	SAMN19690117	Complete Genome	REFSEQ	98.1107	99.9813	1.05076	Taiwan	2020	Homo sapiens	X4-705	pleural effusion
GCF_023517195.1	PRJNA224116	SAMN19762528	Complete Genome	REFSEQ	98.1242	99.9655	0.628046	China	2019	-	DETAB-E51	Bed controller_P22_BU23
GCF_023517155.1	PRJNA224116	SAMN19762585	Complete Genome	REFSEQ	98.1221	99.9813	0.609299	China	2019	-	DETAB-E108	Bedside table_P53_BU18
GCF_023517715.1	PRJNA224116	SAMN19762632	Complete Genome	REFSEQ	98.0997	99.1939	0.628046	China	2019	-	DETAB-E155	Infusion stand_P63_BU16
GCF_023517255.1	PRJNA224116	SAMN19762636	Complete Genome	REFSEQ	98.1576	99.9813	0.628046	China	2019	-	DETAB-E159	Locker_P26_BU28
GCF_023517175.1	PRJNA224116	SAMN19762827	Complete Genome	REFSEQ	98.0606	99.9813	0.619939	China	2019	-	DETAB-E351	Ventilator shelf_P101_BU22
GCF_023517735.1	PRJNA224116	SAMN19774588	Complete Genome	REFSEQ	98.1752	99.5876	0.628046	China	2019	Homo sapiens	DETAB-P24	Nasogastric tube_P44_BU19
GCF_023517215.1	PRJNA224116	SAMN19774606	Complete Genome	REFSEQ	98.1393	99.9813	0.628046	China	2019	Homo sapiens	DETAB-P43	Nasojejunal tube_P50_BU7
GCF_023517235.1	PRJNA224116	SAMN19774628	Complete Genome	REFSEQ	98.0367	100	0	China	2019	Homo sapiens	DETAB-P65	Rectal swab_P87_BU24
GCF_023517695.1	PRJNA224116	SAMN19774653	Complete Genome	REFSEQ	98.1134	99.9813	0.628046	China	2019	Homo sapiens	DETAB-P90	Rectal swab_P131_BU4
GCF_019457715.1	PRJNA224116	SAMN19911946	Complete Genome	REFSEQ	97.8632	100	0	France	2015	Canis lupus	40288	urine
GCF_019458485.1	PRJNA224116	SAMN19955388	Complete Genome	REFSEQ	97.8853	100	0.273973	USA	2010	Homo sapiens	MRSN 56	Hip
GCF_028751705.1	PRJNA224116	SAMN20255403	Complete Genome	REFSEQ	98.1002	99.8828	0.609299	Australia	2004	Homo sapiens	4117201	-
GCF_028752815.1	PRJNA224116	SAMN20255406	Complete Genome	REFSEQ	98.0996	99.7708	0.625047	Australia	2004	Homo sapiens	4117201	-
GCF_019356075.1	PRJNA224116	SAMN20295790	Complete Genome	REFSEQ	98.1481	99.9025	0.628046	China	2018	Homo sapiens	B10	sputum
GCF_019356215.1	PRJNA224116	SAMN20326334	Complete Genome	REFSEQ	97.9878	100	0.410959	France	1951	Homo sapiens	17978UN	-
GCF_020271605.1	PRJNA224116	SAMN20477964	Complete Genome	REFSEQ	97.8767	100	0.479452	China	2020	-	LHC22-2	a feces sample of chicken origin
GCF_019997865.1	PRJNA224116	SAMN21028540	Complete Genome	REFSEQ	97.9809	100	0.273973	China	2017	Homo sapiens	AB43	sputum
GCF_020132105.1	PRJNA224116	SAMN21240079	Complete Genome	REFSEQ	97.8545	100	0.410959	Lebanon	2015	Homo sapiens	Cl300	tracheal aspirate
GCF_021019455.3	PRJNA224116	SAMN21245944	Complete Genome	REFSEQ	97.9121	100	0.273973	Afghanistan	2018	Homo sapiens	MRSN571146	wound
GCF_021019495.3	PRJNA224116	SAMN21245945	Complete Genome	REFSEQ	97.9088	100	0.273973	Afghanistan	2018	Homo sapiens	MRSN576822	wound
GCF_025258765.1	PRJNA224116	SAMN21493827	Complete Genome	REFSEQ	97.9757	100	0.130463	USA	2021	Homo sapiens	2021CK-01300	Wound/Abscess
GCF_025258785.1	PRJNA224116	SAMN21493859	Complete Genome	REFSEQ	97.9805	100	0.130463	USA	2021	Homo sapiens	2021CK-01332	Wound/Abscess
GCF_025258805.1	PRJNA224116	SAMN21493860	Complete Genome	REFSEQ	97.9924	99.863	0.130463	USA	2021	Homo sapiens	2021CK-01333	sputum
GCF_025258845.1	PRJNA224116	SAMN21493862	Complete Genome	REFSEQ	97.9797	100	0.130463	USA	2021	Homo sapiens	2021CK-01335	Wound/Abscess
GCF_025369955.1	PRJNA224116	SAMN21924069	Complete Genome	REFSEQ	97.9866	100	0.130463	USA	2021	Homo sapiens	2021CK-01407	sputum
GCF_025258705.1	PRJNA224116	SAMN21924070	Complete Genome	REFSEQ	97.99	100	0.130463	USA	2021	Homo sapiens	2021CK-01408	blood
GCF_025258745.1	PRJNA224116	SAMN21924071	Complete Genome	REFSEQ	97.9781	100	0.130463	USA	2021	Homo sapiens	2021CK-01409	Wound/Abscess
GCF_021730415.1	PRJNA224116	SAMN22170067	Complete Genome	REFSEQ	98.1369	99.9813	0.660855	Thailand	2015	Homo sapiens	AB329	sputum
GCF_020520325.1	PRJNA224116	SAMN22202742	Complete Genome	REFSEQ	98.122	99.9813	0.628046	Hong Kong	2020	Homo sapiens	HKU3	hospital
GCF_020520345.1	PRJNA224116	SAMN22202743	Complete Genome	REFSEQ	98.1256	99.9813	0.628046	Hong Kong	2020	Homo sapiens	HKU4	hospital
GCF_020520365.1	PRJNA224116	SAMN22202744	Complete Genome	REFSEQ	98.1239	99.9813	0.628046	Hong Kong	2020	Homo sapiens	HKU5	hospital
GCF_020520385.1	PRJNA224116	SAMN22202745	Complete Genome	REFSEQ	98.1223	99.9813	0.628046	Hong Kong	2020	Homo sapiens	HKU6	hospital
GCF_020520405.1	PRJNA224116	SAMN22202746	Complete Genome	REFSEQ	98.123	99.9813	0.628046	Hong Kong	2020	Homo sapiens	HKU7	hospital
GCF_020906565.1	PRJNA224116	SAMN23041240	Complete Genome	REFSEQ	98.1088	99.85	0.609299	Germany	2018	Homo sapiens	ACI713	-
GCF_024749765.1	PRJNA224116	SAMN23078444	Complete Genome	REFSEQ	98.0369	100	0	Germany	not collected	Homo sapiens	DB002	unknown
GCF_024749745.1	PRJNA224116	SAMN23078445	Complete Genome	REFSEQ	98.0333	100	0	Germany	not collected	Homo sapiens	DB003	unknown
GCF_024749685.1	PRJNA224116	SAMN23078448	Complete Genome	REFSEQ	98.1487	99.9813	0.628046	Germany	not collected	Homo sapiens	DB006	unknown
GCF_024749665.1	PRJNA224116	SAMN23078449	Complete Genome	REFSEQ	98.0391	100	0	Germany	not collected	Homo sapiens	DB007	unknown
GCF_024749645.1	PRJNA224116	SAMN23078450	Complete Genome	REFSEQ	97.9963	100	0.273973	Germany	not collected	Homo sapiens	DB008	unknown
GCF_024749625.1	PRJNA224116	SAMN23078451	Complete Genome	REFSEQ	97.9814	100	0.0391389	Germany	not collected	Homo sapiens	DB053	unknown
GCF_024749605.1	PRJNA224116	SAMN23078452	Complete Genome	REFSEQ	97.9644	100	0	Germany	not collected	Homo sapiens	LMG994	unknown
GCF_024749405.1	PRJNA224116	SAMN23078453	Complete Genome	REFSEQ	97.9482	100	0.273973	Germany	not collected	Homo sapiens	OC074	unknown
GCF_024749425.1	PRJNA224116	SAMN23078455	Complete Genome	REFSEQ	97.9816	100	0.0391389	Germany	not collected	Homo sapiens	OC073	unknown
GCF_024749545.1	PRJNA224116	SAMN23078457	Complete Genome	REFSEQ	98.1319	99.9813	0.628046	Germany	not collected	Homo sapiens	OC043	unknown
GCF_024749485.1	PRJNA224116	SAMN23078458	Complete Genome	REFSEQ	97.9237	100	0	Germany	not collected	Homo sapiens	OC064	unknown
GCF_024749525.1	PRJNA224116	SAMN23078459	Complete Genome	REFSEQ	97.9405	100	0.136986	Germany	not collected	Homo sapiens	OC059	unknown
GCF_024749465.1	PRJNA224116	SAMN23078460	Complete Genome	REFSEQ	97.8704	100	0.410959	Germany	not collected	Homo sapiens	OC068	unknown
GCF_024749385.1	PRJNA224116	SAMN23078461	Complete Genome	REFSEQ	97.9511	100	0	Germany	not collected	Homo sapiens	OC081	unknown
GCF_024749505.1	PRJNA224116	SAMN23078462	Complete Genome	REFSEQ	98.0103	100	0	Germany	not collected	Homo sapiens	OC061	unknown
GCF_024749445.1	PRJNA224116	SAMN23078463	Complete Genome	REFSEQ	97.9815	100	0.136986	Germany	not collected	Homo sapiens	OC070	unknown
GCF_020985285.1	PRJNA224116	SAMN23235066	Complete Genome	REFSEQ	97.8434	100	0.182648	China	2021	-	SHOU-Ab01	Andrias davidianus
GCF_021609965.1	PRJNA224116	SAMN23416895	Complete Genome	REFSEQ	97.8871	100	0.273973	USA	2010	Homo sapiens	MRSN57	Hip
GCF_021484905.1	PRJNA224116	SAMN23416908	Complete Genome	REFSEQ	97.8846	100	0.273973	USA	2010	Homo sapiens	MRSN 58	Hip
GCF_024205285.1	PRJNA224116	SAMN23553142	Complete Genome	REFSEQ	97.9838	100	0	China	2021	Homo sapiens	DETAB-R21	patient
GCF_024205265.1	PRJNA224116	SAMN23553143	Complete Genome	REFSEQ	97.9835	100	0	China	2021	Homo sapiens	XH1935	patient
GCF_023362275.1	PRJNA224116	SAMN24114644	Complete Genome	REFSEQ	98.1085	99.9813	1.16939	China	2016	Homo sapiens	5388	blood
GCF_023362255.1	PRJNA224116	SAMN24114645	Complete Genome	REFSEQ	98.1166	99.5876	0.609299	China	2005	Homo sapiens	5626	sputum
GCF_023362235.1	PRJNA224116	SAMN24114646	Complete Genome	REFSEQ	98.0944	99.9074	0.628046	China	2013	Homo sapiens	5634	sputum
GCF_023362215.1	PRJNA224116	SAMN24114647	Complete Genome	REFSEQ	98.1564	99.9813	0.628046	China	2005	Homo sapiens	5651	sputum
GCF_023362195.1	PRJNA224116	SAMN24114648	Complete Genome	REFSEQ	98.1107	99.9813	0.628046	China	2013	Homo sapiens	5653	sputum
GCF_023362175.1	PRJNA224116	SAMN24114649	Complete Genome	REFSEQ	98.1104	99.9813	0.628046	China	2014	Homo sapiens	5656	blood
GCF_023362155.1	PRJNA224116	SAMN24114651	Complete Genome	REFSEQ	98.1243	99.9813	0.628046	China	2014	Homo sapiens	5663	blood
GCF_023362135.1	PRJNA224116	SAMN24114652	Complete Genome	REFSEQ	98.1239	99.9813	0.628046	China	2014	Homo sapiens	5664	blood
GCF_023362115.1	PRJNA224116	SAMN24114654	Complete Genome	REFSEQ	98.1472	99.85	0.628046	China	2016	Homo sapiens	5666	blood
GCF_023362095.1	PRJNA224116	SAMN24114655	Complete Genome	REFSEQ	98.1136	99.7844	0.609299	China	2013	Homo sapiens	5669	blood
GCF_023362075.1	PRJNA224116	SAMN24114656	Complete Genome	REFSEQ	98.118	99.9813	0.609299	China	2013	Homo sapiens	5670	blood
GCF_023362055.1	PRJNA224116	SAMN24114657	Complete Genome	REFSEQ	98.1095	98.8001	0.609299	China	2013	Homo sapiens	5671	blood
GCF_023362035.1	PRJNA224116	SAMN24114658	Complete Genome	REFSEQ	98.1111	99.9813	0.628046	China	2013	Homo sapiens	5672	blood
GCF_023362015.1	PRJNA224116	SAMN24114660	Complete Genome	REFSEQ	98.1018	99.925	0.609299	China	2014	Homo sapiens	5679	blood
GCF_023361995.1	PRJNA224116	SAMN24114661	Complete Genome	REFSEQ	98.0834	99.9813	0.628046	China	2016	Homo sapiens	5683	blood
GCF_023361975.1	PRJNA224116	SAMN24114662	Complete Genome	REFSEQ	98.1526	99.9813	0.628046	China	2016	Homo sapiens	5685	blood
GCF_023361955.1	PRJNA224116	SAMN24114663	Complete Genome	REFSEQ	98.1163	99.5876	0.628046	China	2016	Homo sapiens	5689	blood
GCF_023361935.1	PRJNA224116	SAMN24114664	Complete Genome	REFSEQ	98.1068	99.932	0.628046	China	2010	Homo sapiens	5729	secretion
GCF_023361915.1	PRJNA224116	SAMN24114665	Complete Genome	REFSEQ	98.1075	99.9813	0.639584	China	2010	Homo sapiens	5732	sputum
GCF_023361895.1	PRJNA224116	SAMN24114666	Complete Genome	REFSEQ	98.099	99.951	0.609299	China	2010	Homo sapiens	5734	blood
GCF_023361875.1	PRJNA224116	SAMN24114667	Complete Genome	REFSEQ	98.1172	99.9813	0.609299	China	2010	Homo sapiens	5736	sputum
GCF_023361855.1	PRJNA224116	SAMN24114668	Complete Genome	REFSEQ	98.1218	99.9813	0.609299	China	2010	Homo sapiens	5740	sputum
GCF_023361835.1	PRJNA224116	SAMN24114669	Complete Genome	REFSEQ	98.1067	99.9156	0.628046	China	2010	Homo sapiens	5741	sputum
GCF_023361815.1	PRJNA224116	SAMN24114670	Complete Genome	REFSEQ	98.112	99.9813	0.628046	China	2011	Homo sapiens	5745	abdominal fluid
GCF_023361275.1	PRJNA224116	SAMN24114671	Complete Genome	REFSEQ	98.111	99.5438	0.628046	China	2012	Homo sapiens	5759	balf
GCF_023361255.1	PRJNA224116	SAMN24114672	Complete Genome	REFSEQ	98.1158	99.85	0.609299	China	2012	Homo sapiens	5760	sputum
GCF_023361235.1	PRJNA224116	SAMN24114673	Complete Genome	REFSEQ	98.1106	99.9813	0.628046	China	2012	Homo sapiens	5761	blood
GCF_023361215.1	PRJNA224116	SAMN24114674	Complete Genome	REFSEQ	98.1064	99.9813	0.628046	China	2010	Homo sapiens	5765	blood
GCF_023361195.1	PRJNA224116	SAMN24114675	Complete Genome	REFSEQ	98.1019	99.9813	0.628046	China	2012	Homo sapiens	5767	blood
GCF_023361175.1	PRJNA224116	SAMN24114676	Complete Genome	REFSEQ	98.1029	99.9813	0.609299	China	2012	Homo sapiens	5768	blood
GCF_023361155.1	PRJNA224116	SAMN24114677	Complete Genome	REFSEQ	98.1061	99.9813	0.609299	China	2012	Homo sapiens	5769	bronchial
GCF_023361135.1	PRJNA224116	SAMN24114678	Complete Genome	REFSEQ	98.1015	99.9813	0.609299	China	2012	Homo sapiens	5771	balf
GCF_023361095.1	PRJNA224116	SAMN24114679	Complete Genome	REFSEQ	98.1473	98.8001	0.628046	China	2012	Homo sapiens	5773	secretion
GCF_023361115.1	PRJNA224116	SAMN24114680	Complete Genome	REFSEQ	98.1482	99.9813	0.628046	China	2018	Homo sapiens	5779	sputum
GCF_023361075.1	PRJNA224116	SAMN24114683	Complete Genome	REFSEQ	98.1173	99.9813	0.648768	China	2018	Homo sapiens	5839	blood
GCF_023361055.1	PRJNA224116	SAMN24114684	Complete Genome	REFSEQ	98.0712	99.9813	0.609299	China	2018	Homo sapiens	5840	blood
GCF_023361035.1	PRJNA224116	SAMN24114685	Complete Genome	REFSEQ	98.1107	99.9156	0.628046	China	2018	Homo sapiens	5846	blood
GCF_023361015.1	PRJNA224116	SAMN24114686	Complete Genome	REFSEQ	98.1024	99.833	0.609299	China	2016	Homo sapiens	5847	sputum
GCF_023360995.1	PRJNA224116	SAMN24114687	Complete Genome	REFSEQ	98.0818	99.9813	0.628046	China	2018	Homo sapiens	5955	tracheal aspirate
GCF_023360975.1	PRJNA224116	SAMN24114688	Complete Genome	REFSEQ	98.1204	99.9813	0.628046	China	2018	Homo sapiens	6080	blood
GCF_021398135.1	PRJNA224116	SAMN24425237	Complete Genome	REFSEQ	98.1151	99.9813	0.628046	China	2021	Homo sapiens	AB1343	sputum
GCF_022605145.1	PRJNA224116	SAMN25087978	Complete Genome	REFSEQ	97.8796	99.863	0.182648	China	2013	Homo sapiens	AB5116	sputum
GCF_022460575.1	PRJNA224116	SAMN25131635	Complete Genome	REFSEQ	98.1358	99.5876	0.628046	Belgium	missing	Homo sapiens	AB16-VUB	-
GCF_022460295.1	PRJNA224116	SAMN25131637	Complete Genome	REFSEQ	98.0314	100	0.547945	Belgium	missing	Homo sapiens	AB21-VUB	-
GCF_022460015.1	PRJNA224116	SAMN25131639	Complete Genome	REFSEQ	98.0838	99.1939	0.609299	Belgium	missing	Homo sapiens	AB36-VUB	-
GCF_022459875.1	PRJNA224116	SAMN25131640	Complete Genome	REFSEQ	97.9732	99.9813	0.609299	Belgium	missing	Homo sapiens	AB39-VUB	-
GCF_022459595.1	PRJNA224116	SAMN25131642	Complete Genome	REFSEQ	98.1369	99.9813	0.628046	Belgium	missing	Homo sapiens	AB167-VUB	-
GCF_022459415.1	PRJNA224116	SAMN25131643	Complete Genome	REFSEQ	97.8835	100	0	Belgium	missing	Homo sapiens	AB169-VUB	-
GCF_022459295.1	PRJNA224116	SAMN25131644	Complete Genome	REFSEQ	98.0976	99.9813	0.674916	Belgium	missing	Homo sapiens	AB171-VUB	-
GCF_022459175.1	PRJNA224116	SAMN25131645	Complete Genome	REFSEQ	98.0939	99.9813	1.06862	Belgium	missing	Homo sapiens	AB172-VUB	-
GCF_022459155.1	PRJNA224116	SAMN25131646	Complete Genome	REFSEQ	98.0655	99.9813	0.628046	Belgium	missing	Homo sapiens	AB173-VUB	-
GCF_022459135.1	PRJNA224116	SAMN25131647	Complete Genome	REFSEQ	98.1302	99.9813	0.806149	Belgium	missing	Homo sapiens	AB175-VUB	-
GCF_022459095.1	PRJNA224116	SAMN25131649	Complete Genome	REFSEQ	97.8599	100	0.410959	Belgium	missing	Homo sapiens	AB177-VUB	-
GCF_022459075.1	PRJNA224116	SAMN25131650	Complete Genome	REFSEQ	97.9322	99.863	0.0684932	Belgium	missing	Homo sapiens	AB179-VUB	-
GCF_022459055.1	PRJNA224116	SAMN25131651	Complete Genome	REFSEQ	98.147	99.9813	0.628046	Belgium	missing	Homo sapiens	AB180-VUB	-
GCF_022548575.1	PRJNA224116	SAMN25131652	Complete Genome	REFSEQ	98.1107	99.5876	0.647732	Belgium	missing	Homo sapiens	AB181-VUB	-
GCF_022469075.1	PRJNA224116	SAMN25131653	Complete Genome	REFSEQ	98.1239	99.9813	0.628046	Belgium	missing	Homo sapiens	AB183-VUB	-
GCF_022468795.1	PRJNA224116	SAMN25131657	Complete Genome	REFSEQ	98.1232	100	0	Belgium	missing	Homo sapiens	AB189-VUB	-
GCF_022468755.1	PRJNA224116	SAMN25131658	Complete Genome	REFSEQ	98.1184	99.8238	0.628046	Belgium	missing	Homo sapiens	AB193-VUB	-
GCF_022468565.1	PRJNA224116	SAMN25131660	Complete Genome	REFSEQ	98.0776	99.9813	0.609299	Belgium	missing	Homo sapiens	AB212-VUB	-
GCF_022468455.1	PRJNA224116	SAMN25131661	Complete Genome	REFSEQ	98.1215	99.9813	1.36624	Belgium	missing	Homo sapiens	AB213-VUB	-
GCF_022468355.1	PRJNA224116	SAMN25131662	Complete Genome	REFSEQ	98.0981	99.9813	0.75928	Belgium	missing	Homo sapiens	AB214-VUB	-
GCF_022468295.1	PRJNA224116	SAMN25131663	Complete Genome	REFSEQ	98.1335	99.9813	0.96363	Belgium	missing	Homo sapiens	AB216-VUB	-
GCF_022468195.1	PRJNA224116	SAMN25131664	Complete Genome	REFSEQ	98.132	99.9813	0.628046	Belgium	missing	Homo sapiens	AB217-VUB	-
GCF_022468075.1	PRJNA224116	SAMN25131665	Complete Genome	REFSEQ	98.1339	99.9813	0.96363	Belgium	missing	Homo sapiens	AB219-VUB	-
GCF_022467975.1	PRJNA224116	SAMN25131666	Complete Genome	REFSEQ	98.0924	99.9813	1.06285	Belgium	missing	Homo sapiens	AB220-VUB	-
GCF_022467905.1	PRJNA224116	SAMN25131667	Complete Genome	REFSEQ	98.1354	100	0.273973	Belgium	missing	Homo sapiens	AB222-VUB	-
GCF_022467805.1	PRJNA224116	SAMN25131668	Complete Genome	REFSEQ	98.1142	99.5876	1.59168	Belgium	missing	Homo sapiens	AB224-VUB	-
GCF_022467735.1	PRJNA224116	SAMN25131669	Complete Genome	REFSEQ	98.1197	99.9813	0.628046	Belgium	missing	Homo sapiens	AB226-VUB	-
GCF_022467655.1	PRJNA224116	SAMN25131670	Complete Genome	REFSEQ	97.9064	100	0	Belgium	missing	Homo sapiens	AB227-VUB	-
GCF_022467535.1	PRJNA224116	SAMN25131671	Complete Genome	REFSEQ	97.9049	100	0	Belgium	missing	Homo sapiens	AB229-VUB	-
GCF_022467435.1	PRJNA224116	SAMN25131672	Complete Genome	REFSEQ	98.064	100	0	Belgium	missing	Homo sapiens	AB231-VUB	-
GCF_022467255.1	PRJNA224116	SAMN25131674	Complete Genome	REFSEQ	98.1003	98.4064	0.628046	Belgium	missing	Homo sapiens	AB233-VUB	-
GCF_022467135.1	PRJNA224116	SAMN25131675	Complete Genome	REFSEQ	97.9782	100	0.273973	France	1951	Homo sapiens	ATCC17978-VUB	-
GCF_022466975.1	PRJNA224116	SAMN25131676	Complete Genome	REFSEQ	99.9941	99.6347	0	Netherlands	1911	Homo sapiens	ATCC19606-VUB	-
GCF_022466815.1	PRJNA224116	SAMN25131677	Complete Genome	REFSEQ	97.9214	100	0	USA	1944	-	DSM30011-VUB	Plant microbiota
GCF_026194635.2	PRJNA224116	SAMN25159974	Complete Genome	REFSEQ	97.885	100	0.72407	USA	2019	-	C9	Draining-Matting Conveyor
GCF_021725415.1	PRJNA224116	SAMN25185246	Complete Genome	REFSEQ	98.115	99.9813	0.628046	China	2018	Homo sapiens	BM2333	-
GCF_021764725.1	PRJNA224116	SAMN25236223	Complete Genome	REFSEQ	98.0948	99.5573	0.707724	South Korea	2011	Homo sapiens	NCCP 16007	urine
GCF_021899715.1	PRJNA224116	SAMN25263435	Complete Genome	REFSEQ	97.8846	100	0.547945	Germany	2018	Homo sapiens	Nord4-2	-
GCF_022107375.1	PRJNA224116	SAMN25755497	Complete Genome	REFSEQ	97.9543	100	0.136986	USA	2022	Homo sapiens	2022CK-00063	sputum
GCF_030718975.1	PRJNA224116	SAMN25755500	Complete Genome	REFSEQ	98.126	99.9813	0.628046	USA	2022	Homo sapiens	2022CK-00066	Wound/Abscess
GCF_022429585.1	PRJNA224116	SAMN26082895	Complete Genome	REFSEQ	98.1298	99.9813	0.628046	China	2021	Homo sapiens	AB2877	sputum
GCF_022759565.1	PRJNA224116	SAMN26814682	Complete Genome	REFSEQ	98.1189	99.5876	0.609299	China	2018	Homo sapiens	NY5301	ascites
GCF_029714145.1	PRJNA224116	SAMN27010192	Complete Genome	REFSEQ	98.0961	99.9813	0.628046	Saudi Arabia	2018	Homo sapiens	HAB11	not collected
GCF_029714005.1	PRJNA224116	SAMN27010219	Complete Genome	REFSEQ	98.1079	99.9813	0.646794	Saudi Arabia	2018	Homo sapiens	JAB77	not collected
GCF_029714045.1	PRJNA224116	SAMN27010226	Complete Genome	REFSEQ	98.0977	99.9813	0.646794	Saudi Arabia	2018	Homo sapiens	JAB117	not collected
GCF_029713945.1	PRJNA224116	SAMN27010231	Complete Genome	REFSEQ	98.114	99.9813	0.628046	Saudi Arabia	2019	Homo sapiens	JAB144	not collected
GCF_029713865.1	PRJNA224116	SAMN27010238	Complete Genome	REFSEQ	98.0954	99.9625	1.63855	Saudi Arabia	2019	Homo sapiens	JAB186	not collected
GCF_029714085.1	PRJNA224116	SAMN27010253	Complete Genome	REFSEQ	98.1269	99.9813	0.628046	Saudi Arabia	2019	Homo sapiens	JAB270	not collected
GCF_029714165.1	PRJNA224116	SAMN27010256	Complete Genome	REFSEQ	98.1197	99.9813	0.628046	Saudi Arabia	2019	Homo sapiens	MAB9	not collected
GCF_029713965.1	PRJNA224116	SAMN27010258	Complete Genome	REFSEQ	98.1303	99.9813	0.449944	Saudi Arabia	2019	Homo sapiens	MAB17	not collected
GCF_029713765.1	PRJNA224116	SAMN27010269	Complete Genome	REFSEQ	98.1304	99.9813	0.628046	Saudi Arabia	2018	Homo sapiens	RAB9	not collected
GCF_029713925.1	PRJNA224116	SAMN27010270	Complete Genome	REFSEQ	98.1231	99.9813	0.628046	Saudi Arabia	2018	Homo sapiens	RAB11	not collected
GCF_029748815.1	PRJNA224116	SAMN27010271	Complete Genome	REFSEQ	98.1316	99.9813	0.628046	Saudi Arabia	2018	Homo sapiens	RAB14	not collected
GCF_029713905.1	PRJNA224116	SAMN27010277	Complete Genome	REFSEQ	98.1396	99.9813	0.651205	Saudi Arabia	2019	Homo sapiens	RAB53	not collected
GCF_029713745.1	PRJNA224116	SAMN27010278	Complete Genome	REFSEQ	98.1208	99.9813	0.628046	Saudi Arabia	2019	Homo sapiens	RAB55	not collected
GCF_029714105.1	PRJNA224116	SAMN27010284	Complete Genome	REFSEQ	98.0971	99.9813	0.693663	Saudi Arabia	2019	Homo sapiens	RAB73	not collected
GCF_029713785.1	PRJNA224116	SAMN27010289	Complete Genome	REFSEQ	98.1284	99.9813	1.23735	Saudi Arabia	2019	Homo sapiens	RAB94	not collected
GCF_029713845.1	PRJNA224116	SAMN27010291	Complete Genome	REFSEQ	98.1645	99.9813	0.651205	Saudi Arabia	2019	Homo sapiens	RAB97	not collected
GCF_022916555.1	PRJNA224116	SAMN27182072	Complete Genome	REFSEQ	98.135	99.9813	0.628046	USA	2022	Homo sapiens	2022CK-00185	other
GCF_022916135.1	PRJNA224116	SAMN27182098	Complete Genome	REFSEQ	98.0722	100	0	USA	2022	Homo sapiens	2022CK-00211	sputum
GCF_022921035.1	PRJNA224116	SAMN27303889	Complete Genome	REFSEQ	98.1123	99.9813	0.628046	China	2022	Homo sapiens	AB4451	sputum
GCF_023054035.1	PRJNA224116	SAMN27591179	Complete Genome	REFSEQ	98.0566	100	0	USA	2022	Homo sapiens	2022CK-00241	sputum
GCF_023093135.1	PRJNA224116	SAMN27739163	Complete Genome	REFSEQ	98.076	100	0	USA	2022	Homo sapiens	2022CK-00251	sputum
GCF_023221535.1	PRJNA224116	SAMN27770840	Complete Genome	REFSEQ	98.0982	99.9813	0.609299	Australia	1999	Homo sapiens	F46	clinical
GCF_030168265.1	PRJNA224116	SAMN27918892	Complete Genome	REFSEQ	98.1333	99.9543	0	USA	2013	Bos taurus	51248	-
GCF_030168245.1	PRJNA224116	SAMN27957725	Complete Genome	REFSEQ	98.149	100	0	USA	2012/2015	Homo sapiens	Mu1984	blood
GCF_030168285.1	PRJNA224116	SAMN27988045	Complete Genome	REFSEQ	98.1231	99.9813	0.609299	USA	2012/2015	Homo sapiens	Mu1956	respiratory
GCF_023615345.1	PRJNA224116	SAMN28788543	Complete Genome	REFSEQ	98.0455	100	0	USA	2022	Homo sapiens	2022CK-00317	sputum
GCF_023615705.1	PRJNA224116	SAMN28788563	Complete Genome	REFSEQ	98.1253	99.9813	0.628046	USA	2022	Homo sapiens	2022CK-00337	sputum
GCF_023615745.1	PRJNA224116	SAMN28788566	Complete Genome	REFSEQ	97.9763	100	0.273973	USA	2022	Homo sapiens	2022CK-00340	Wound/Abscess
GCF_024426665.1	PRJNA224116	SAMN28871714	Complete Genome	REFSEQ	97.8877	100	0	Lebanon	2012	Homo sapiens	Cl107	urine
GCF_023809625.1	PRJNA224116	SAMN28980502	Complete Genome	REFSEQ	97.8096	100	0.502283	India	2020	Homo sapiens	280820	blood
GCF_023809705.1	PRJNA224116	SAMN28981486	Complete Genome	REFSEQ	97.7783	100	0.502283	India	2020	Homo sapiens	VB280821	blood
GCF_024106315.1	PRJNA224116	SAMN29151496	Complete Genome	REFSEQ	98.0801	100	0	USA	2022	Homo sapiens	2022CK-00371	skin
GCF_024134625.1	PRJNA224116	SAMN29176533	Complete Genome	REFSEQ	98.1086	99.9813	0.628046	missing	missing	Homo sapiens	A54S	missing
GCF_024134685.1	PRJNA224116	SAMN29176534	Complete Genome	REFSEQ	98.1084	99.9813	0.628046	missing	missing	Homo sapiens	A54R	missing
GCF_024134645.1	PRJNA224116	SAMN29176535	Complete Genome	REFSEQ	97.9792	100	0.273973	missing	missing	Homo sapiens	17978S	missing
GCF_024134665.1	PRJNA224116	SAMN29176536	Complete Genome	REFSEQ	97.9758	100	0.273973	missing	missing	Homo sapiens	17978R	missing
GCF_024138105.1	PRJNA224116	SAMN29386244	Complete Genome	REFSEQ	98.078	99.9813	0.609299	South Korea	2016	Homo sapiens	KBN10P04593	blood
GCF_024172225.1	PRJNA224116	SAMN29388303	Complete Genome	REFSEQ	98.1088	99.9813	0.609299	South Korea	2018	Homo sapiens	KBN10P05679	-
GCF_039566025.1	PRJNA224116	SAMN29784748	Complete Genome	REFSEQ	98.1471	99.9813	0.628046	Thailand	2005	Homo sapiens	Aci44	sputum
GCF_025264005.1	PRJNA224116	SAMN30068511	Complete Genome	REFSEQ	97.9724	100	0.273973	China	2022	Homo sapiens	AB105	-
GCF_028753295.1	PRJNA224116	SAMN30174926	Complete Genome	REFSEQ	98.1022	99.9813	0.609299	Unknown	Unknown	Homo sapiens	A9844	-
GCF_027239755.1	PRJNA224116	SAMN30248452	Complete Genome	REFSEQ	97.8115	100	0.182648	China	2020	Homo sapiens	AOR07-BL	blood
GCF_024730805.1	PRJNA224116	SAMN30308647	Complete Genome	REFSEQ	98.1268	99.9813	0.628046	China	2022	Homo sapiens	AB3927	Bronchoalveolar lavage fluid
GCF_024800505.1	PRJNA224116	SAMN30472217	Complete Genome	REFSEQ	98.1096	99.9813	0.628046	China	2022	Homo sapiens	AB2369	sputum
GCF_024922185.1	PRJNA224116	SAMN30655645	Complete Genome	REFSEQ	97.9741	100	0.273973	USA	2022	Homo sapiens	2022CK-00480	sputum
GCF_029223565.1	PRJNA224116	SAMN30697644	Complete Genome	REFSEQ	98.0357	100	0	China	2019	Homo sapiens	DETAB-C9	-
GCF_029774195.1	PRJNA224116	SAMN30697790	Complete Genome	REFSEQ	98.0323	100	0	China	2021	Homo sapiens	ZHOU	-
GCF_025853895.1	PRJNA224116	SAMN30898311	Complete Genome	REFSEQ	97.9438	100	0.136986	USA	2018	Homo sapiens	1326359	Cervical
GCF_025853915.1	PRJNA224116	SAMN30898312	Complete Genome	REFSEQ	97.9527	100	0.136986	USA	2018	Homo sapiens	1326525-1	skin
GCF_025853935.1	PRJNA224116	SAMN30898313	Complete Genome	REFSEQ	97.9515	100	0.136986	USA	2018	Homo sapiens	1326525-2	skin
GCF_025853955.1	PRJNA224116	SAMN30898314	Complete Genome	REFSEQ	97.9514	100	0.136986	USA	2018	Homo sapiens	1326525-3	skin
GCF_025853975.1	PRJNA224116	SAMN30898315	Complete Genome	REFSEQ	97.9518	100	0.136986	USA	2018	Homo sapiens	1326527-1	skin
GCF_025853995.1	PRJNA224116	SAMN30898316	Complete Genome	REFSEQ	98.122	99.9813	0.609299	USA	2018	Homo sapiens	1326527-2	skin
GCF_025854015.1	PRJNA224116	SAMN30898321	Complete Genome	REFSEQ	98.12	99.9813	0.609299	USA	2018	Homo sapiens	1326569	skin
GCF_025854035.1	PRJNA224116	SAMN30898322	Complete Genome	REFSEQ	97.9475	100	0	USA	2018	Homo sapiens	1326580	skin
GCF_025854055.1	PRJNA224116	SAMN30898323	Complete Genome	REFSEQ	97.9433	100	0.136986	USA	2018	Homo sapiens	1326581-1	wound
GCF_025854075.1	PRJNA224116	SAMN30898324	Complete Genome	REFSEQ	97.9446	100	0.136986	USA	2018	Homo sapiens	1326581-2	wound
GCF_025854095.1	PRJNA224116	SAMN30898325	Complete Genome	REFSEQ	97.9486	100	0	USA	2018	Homo sapiens	1326584	skin
GCF_025854115.1	PRJNA224116	SAMN30898326	Complete Genome	REFSEQ	97.9434	100	0.136986	USA	2018	Homo sapiens	1326589	skin
GCF_025854135.1	PRJNA224116	SAMN30898327	Complete Genome	REFSEQ	97.9453	100	0.228311	USA	2018	Homo sapiens	1326595	skin
GCF_025854175.1	PRJNA224116	SAMN30898328	Complete Genome	REFSEQ	97.9505	100	0.136986	USA	2018	-	1326924-2	ENVIRONMENT
GCF_025854195.1	PRJNA224116	SAMN30898329	Complete Genome	REFSEQ	97.953	100	0.136986	USA	2018	-	1326924-3	ENVIRONMENT
GCF_025854215.1	PRJNA224116	SAMN30898330	Complete Genome	REFSEQ	97.9432	100	0.136986	USA	2018	-	1326927-1	ENVIRONMENT
GCF_025854235.1	PRJNA224116	SAMN30898331	Complete Genome	REFSEQ	97.953	100	0.136986	USA	2018	-	1326927-2	ENVIRONMENT
GCF_025854255.1	PRJNA224116	SAMN30898332	Complete Genome	REFSEQ	97.9471	100	0	USA	2018	-	1326932	ENVIRONMENT
GCF_025854155.1	PRJNA224116	SAMN30898357	Complete Genome	REFSEQ	98.1237	99.9813	0.609299	USA	2018	-	1326924-1	ENVIRONMENT
GCF_025402975.1	PRJNA224116	SAMN30929087	Complete Genome	REFSEQ	98.1383	99.9813	0.628046	missing	2017	missing	Ab-3556	-
GCF_025449155.1	PRJNA224116	SAMN30929296	Complete Genome	REFSEQ	98.1206	99.9813	0.628046	missing	2017	missing	Ab-3557	-
GCF_025449175.1	PRJNA224116	SAMN30929355	Complete Genome	REFSEQ	98.1366	99.9813	0.628046	missing	2017	missing	YZM-0314	-
GCF_025449195.1	PRJNA224116	SAMN30929528	Complete Genome	REFSEQ	98.1186	99.9813	0.628046	missing	2017	missing	YZM-0406	-
GCF_025722955.1	PRJNA224116	SAMN31100588	Complete Genome	REFSEQ	98.1186	100	0	Unknown	Unknown	Homo sapiens	NY13623	sputum
GCF_033378915.2	PRJNA224116	SAMN31178860	Complete Genome	REFSEQ	98.0598	99.9813	0.628046	Russia	2019	Homo sapiens	SCCH68:Ab991128	cerebrospinal fluid
GCF_025854315.1	PRJNA224116	SAMN31265944	Complete Genome	REFSEQ	98.149	99.9813	0.628046	China	2018	Homo sapiens	AB44	sputm
GCF_025916215.1	PRJNA224116	SAMN31277299	Complete Genome	REFSEQ	98.1307	99.9813	1.02175	China	2022	Homo sapiens	Z198	cerebrospinal fluid
GCF_026062515.1	PRJNA224116	SAMN31494247	Complete Genome	REFSEQ	98.0136	100	0.136986	Australia	1999	Homo sapiens	RBH2	Unknown
GCF_026409185.1	PRJNA224116	SAMN31652219	Complete Genome	REFSEQ	98.0945	99.5573	0.707724	South Korea	2021	-	EAB1	lab-evolved strain
GCF_026409205.1	PRJNA224116	SAMN31652807	Complete Genome	REFSEQ	98.0925	98.9667	0.707724	South Korea	2021	-	EAB2	lab-evolved strain
GCF_029582015.1	PRJNA224116	SAMN31681934	Complete Genome	REFSEQ	97.9437	100	0	Poland	2014	White Stork	29D2	Nestling, choana
GCF_028583465.1	PRJNA224116	SAMN31681935	Complete Genome	REFSEQ	98.0065	100	0.547945	Poland	2013	White Stork	86II/2C	Nestling, choana
GCF_028583505.1	PRJNA224116	SAMN31681936	Complete Genome	REFSEQ	97.9028	100	0.136986	USA	2008	Homo sapiens	AB5075	Tibia, osteotomy elitis
GCF_028583485.1	PRJNA224116	SAMN31681937	Complete Genome	REFSEQ	97.8997	100	0.136986	unknown	unknown	unknown	AB5075-T	unknown
GCF_029459775.1	PRJNA224116	SAMN31681938	Complete Genome	REFSEQ	98.0782	100	0.273973	unknown	unknown	unknown	A118 DeltaH0N27_10825::kan	unknown
GCF_029459755.1	PRJNA224116	SAMN31681939	Complete Genome	REFSEQ	98.0779	100	0.273973	unknown	unknown	unknown	A118 DeltaH0N27_10830::kan	unknown
GCF_029459655.1	PRJNA224116	SAMN31681940	Complete Genome	REFSEQ	98.078	100	0.273973	unknown	unknown	unknown	A118 DeltaH0N27_10820-30::kan	unknown
GCF_029459635.1	PRJNA224116	SAMN31681941	Complete Genome	REFSEQ	98.078	100	0.273973	unknown	unknown	unknown	A118 DeltaH0N27_10820::kan H0N27_10830-K176N	unknown
GCF_029459615.1	PRJNA224116	SAMN31681942	Complete Genome	REFSEQ	98.0022	100	0.410959	unknown	unknown	unknown	ATCC17978 TnAraC-H0N27_12600	unknown
GCF_028548795.2	PRJNA224116	SAMN32546230	Complete Genome	REFSEQ	98.1522	99.9813	0.893276	China	2022	Homo sapiens	AB191	cerebrospinal fluid
GCF_028622775.1	PRJNA224116	SAMN32733960	Complete Genome	REFSEQ	98.1593	99.9813	0.628046	USA	2022	Homo sapiens	2022CK-00784	Wound/Abscess
GCF_027992645.1	PRJNA224116	SAMN32733976	Complete Genome	REFSEQ	98.1525	99.9813	0.628046	USA	2022	Homo sapiens	2022CK-00772	other
GCF_028622695.1	PRJNA224116	SAMN32733979	Complete Genome	REFSEQ	98.1412	99.9813	0.628046	USA	2022	Homo sapiens	2022CK-00783	urine
GCF_028622915.1	PRJNA224116	SAMN32734002	Complete Genome	REFSEQ	98.1602	99.9813	0.628046	USA	2022	Homo sapiens	2022CK-00843	other
GCF_028622715.1	PRJNA224116	SAMN32734006	Complete Genome	REFSEQ	98.1278	99.9813	0.628046	USA	2022	Homo sapiens	2022CK-00839	blood
GCF_028201495.1	PRJNA224116	SAMN32770956	Complete Genome	REFSEQ	97.9154	100	0.136986	Australia	1998	Homo sapiens	WM98	wound
GCF_028370175.1	PRJNA224116	SAMN32805326	Complete Genome	REFSEQ	97.8735	99.726	0	Canada	2007	Homo sapiens	Canada BC-5	nosocomial spread of war-related MDR-ABC in a Canadian civilian hospital with origin from soldier evacuated via Landstuhl Regional Medical Center
GCF_028634015.1	PRJNA224116	SAMN33288250	Complete Genome	REFSEQ	98.1322	100	0	USA	2023	Homo sapiens	2023CK-00127	Wound/Abscess
GCF_029674685.1	PRJNA224116	SAMN33498121	Complete Genome	REFSEQ	98.1013	99.9813	0.628046	Poland	2012	Homo sapiens	96	bronchial secretion
GCF_032822615.1	PRJNA224116	SAMN33787963	Complete Genome	REFSEQ	98.0313	100	0	Australia	2019	-	SAAb472	lake
GCF_029674845.1	PRJNA224116	SAMN34062947	Complete Genome	REFSEQ	98.017	100	0	China	2020	-	Ab_8_4	wastewater
GCF_029674825.1	PRJNA224116	SAMN34062951	Complete Genome	REFSEQ	98.0178	100	0	China	2020	-	LRB	wastewater
GCF_029674805.1	PRJNA224116	SAMN34062976	Complete Genome	REFSEQ	98.0173	100	0	China	2020	-	LRT	wastewater
GCF_029847455.2	PRJNA224116	SAMN34163920	Complete Genome	REFSEQ	97.9553	100	0.410959	not available	2022	-	PUMA0052	not available
GCF_029767905.1	PRJNA224116	SAMN34191879	Complete Genome	REFSEQ	98.147	99.7844	0.628046	USA	2023	Homo sapiens	2023CK-00423	sputum
GCF_029931545.1	PRJNA224116	SAMN34247094	Complete Genome	REFSEQ	97.9619	100	0	China	2010	Homo sapiens	Ab4294	-
GCF_029909475.1	PRJNA224116	SAMN34271990	Complete Genome	REFSEQ	97.9167	100	3.90411	Canada	2021	-	WB4	Feedlot Water bowl
GCF_030028005.1	PRJNA224116	SAMN34376192	Complete Genome	REFSEQ	98.1338	100	0	USA	2010	Homo sapiens	EGA10	hip wound
GCF_030027985.1	PRJNA224116	SAMN34376193	Complete Genome	REFSEQ	98.1271	100	0	USA	2011	Homo sapiens	EGA65	peripheral blood
GCF_040357515.1	PRJNA224116	SAMN35727871	Complete Genome	REFSEQ	97.8601	100	0	China	2021	Homo sapiens	XH2146	-
GCF_030413705.1	PRJNA224116	SAMN36085765	Complete Genome	REFSEQ	97.8482	100	0.136986	France	2013	Homo sapiens	13A297n	urine
GCF_038983805.1	PRJNA224116	SAMN36374863	Complete Genome	REFSEQ	98.1302	99.9813	0.628046	China	2021	patient	-	Nanchang
GCF_038985835.1	PRJNA224116	SAMN36374876	Complete Genome	REFSEQ	98.1131	99.9813	0.609299	China	2022	patient	SRM21	Nanchang
GCF_038987955.1	PRJNA224116	SAMN36374880	Complete Genome	REFSEQ	98.0977	99.5876	0.671791	China	2021	patient	SRM25	Nanchang
GCF_038990075.1	PRJNA224116	SAMN36374885	Complete Genome	REFSEQ	97.9859	100	0	China	2022	patient	SRM3	Nanchang
GCF_038992355.1	PRJNA224116	SAMN36374913	Complete Genome	REFSEQ	98.1206	99.9813	0.628046	China	2021	patient	YFY21	Nanchang
GCF_038993615.1	PRJNA224116	SAMN36374916	Complete Genome	REFSEQ	98.1427	99.9813	0.628046	China	2021	patient	YFY24	Nanchang
GCF_038995905.1	PRJNA224116	SAMN36374919	Complete Genome	REFSEQ	98.1228	99.9813	0.609299	China	2021	patient	YFY27	Nanchang
GCF_038998165.1	PRJNA224116	SAMN36374922	Complete Genome	REFSEQ	98.112	99.951	0.628046	China	2021	patient	YFY3	Nanchang
GCF_045278625.1	PRJNA224116	SAMN36429568	Complete Genome	REFSEQ	97.8858	100	0	South Korea	2018	Homo sapiens	SNUBHAB0006	Seoul National University Bundang Hospital Intensive Care Unit
GCF_045278635.1	PRJNA224116	SAMN36429569	Complete Genome	REFSEQ	98.0817	99.9813	0.609299	South Korea	2017	Homo sapiens	SNUBHAB0220	Seoul National University Bundang Hospital Intensive Care Unit
GCF_045278645.1	PRJNA224116	SAMN36429570	Complete Genome	REFSEQ	98.0911	99.9813	0.609299	South Korea	2015	Homo sapiens	SNUBHAB0062	Seoul National University Bundang Hospital Intensive Care Unit
GCF_045278655.1	PRJNA224116	SAMN36429571	Complete Genome	REFSEQ	98.0876	99.9813	0.609299	South Korea	2018	Homo sapiens	SNUBHAB0197	Seoul National University Bundang Hospital Intensive Care Unit
GCF_033181805.1	PRJNA224116	SAMN36429572	Complete Genome	REFSEQ	98.0909	99.9813	0.609299	South Korea	2016	Homo sapiens	SNUBHAB0277	Seoul National University Bundang Hospital Intensive Care Unit
GCF_045278665.1	PRJNA224116	SAMN36429573	Complete Genome	REFSEQ	98.1103	99.9813	0.609299	South Korea	2016	Homo sapiens	SNUBHAB0292	Seoul National University Bundang Hospital Intensive Care Unit
GCF_045278675.1	PRJNA224116	SAMN36429574	Complete Genome	REFSEQ	98.1472	99.9813	0.628046	South Korea	2016	Homo sapiens	SNUBHAB0274	Seoul National University Bundang Hospital Intensive Care Unit
GCF_033181005.1	PRJNA224116	SAMN36429575	Complete Genome	REFSEQ	98.1416	99.9813	0.628046	South Korea	2016	Homo sapiens	SNUBHAB0291	Seoul National University Bundang Hospital Intensive Care Unit
GCF_045278695.1	PRJNA224116	SAMN36429578	Complete Genome	REFSEQ	97.9239	100	0.146119	South Korea	2019	Homo sapiens	SNUBHAB0137	Seoul National University Bundang Hospital Intensive Care Unit
GCF_030704325.1	PRJNA224116	SAMN36514286	Complete Genome	REFSEQ	98.1521	99.9813	0.628046	USA	2023	Homo sapiens	2023CK-00890	urine
GCF_034494405.1	PRJNA224116	SAMN36514289	Complete Genome	REFSEQ	97.8862	100	0	USA	2023	Homo sapiens	2023CK-00893	blood
GCF_038441255.1	PRJNA224116	SAMN36766186	Complete Genome	REFSEQ	98.097	99.5876	0.628046	Taiwan	2010	Homo sapiens	2010N17-053	respiratory
GCF_038441245.1	PRJNA224116	SAMN36766187	Complete Genome	REFSEQ	98.1006	99.9813	0.609299	Taiwan	2010	Homo sapiens	2010C01-165	respiratory
GCF_038441235.1	PRJNA224116	SAMN36766188	Complete Genome	REFSEQ	98.1222	99.9813	0.609299	Taiwan	2008	Homo sapiens	2008N08-156	respiratory
GCF_038441225.1	PRJNA224116	SAMN36766189	Complete Genome	REFSEQ	98.0893	99.9813	0.628046	Taiwan	2010	Homo sapiens	2010N16-194	respiratory
GCF_038441215.1	PRJNA224116	SAMN36766190	Complete Genome	REFSEQ	98.1005	99.9813	0.628046	Taiwan	2008	Homo sapiens	2008C02-166	Abs/pus/wd
GCF_038441205.1	PRJNA224116	SAMN36766191	Complete Genome	REFSEQ	98.1191	99.9813	0.628046	Taiwan	2006	Homo sapiens	2006S08-082	respiratory
GCF_038441195.1	PRJNA224116	SAMN36766192	Complete Genome	REFSEQ	98.0737	100	0	Taiwan	2008	Homo sapiens	2008S11-069	Abs/pus/wd
GCF_042474915.1	PRJNA224116	SAMN36998938	Complete Genome	REFSEQ	97.9529	100	0	China	2010	Homo sapiens	A207	sputum
GCF_042478285.1	PRJNA224116	SAMN36999747	Complete Genome	REFSEQ	98.0671	100	0.176125	China	2010	Homo sapiens	A1014	sputum
GCF_038442125.1	na	SAMN37223188	Complete Genome	REFSEQ	97.9652	100	0	Netherlands	2021	Homo sapiens	Ab1	sputum
GCF_038442095.1	PRJNA224116	SAMN37223189	Complete Genome	REFSEQ	97.9846	100	0.136986	Netherlands	2021	Homo sapiens	CRAb1	BAL
GCF_038441325.1	PRJNA224116	SAMN37223190	Complete Genome	REFSEQ	97.9601	99.9087	0.136986	Netherlands	2021	Homo sapiens	CRAb2	sputum
GCF_045278855.1	PRJNA224116	SAMN37368109	Complete Genome	REFSEQ	98.1178	99.5876	0.609299	China	2010	Homo sapiens	XH1015	sputum
GCF_043056065.1	PRJNA224116	SAMN37368110	Complete Genome	REFSEQ	98.133	99.9813	0.674916	China	2010	Homo sapiens	XH1016	sputum
GCF_043055495.1	PRJNA224116	SAMN37368111	Complete Genome	REFSEQ	98.115	99.9813	0.609299	China	2010	Homo sapiens	XH1017	sputum
GCF_043054745.1	PRJNA224116	SAMN37368112	Complete Genome	REFSEQ	98.1053	99.9813	0.609299	China	2010	Homo sapiens	XH1018	sputum
GCF_043054075.1	PRJNA224116	SAMN37368113	Complete Genome	REFSEQ	98.121	99.9813	1.82069	China	2010	Homo sapiens	XH1019	sputum
GCF_043056915.1	PRJNA224116	SAMN37368114	Complete Genome	REFSEQ	97.8651	100	0.182648	China	2010	Homo sapiens	XH1022	sputum
GCF_043053445.1	PRJNA224116	SAMN37368115	Complete Genome	REFSEQ	98.1166	99.9813	0.628046	China	2010	Homo sapiens	XH1023	sputum
GCF_043052795.1	PRJNA224116	SAMN37368116	Complete Genome	REFSEQ	98.0868	100	0	China	2010	Homo sapiens	XH1024	Bronchoscopic brushing
GCF_043451925.1	PRJNA224116	SAMN37368117	Complete Genome	REFSEQ	97.8692	99.863	0	China	2010	Homo sapiens	XH1026	sputum
GCF_043052145.1	PRJNA224116	SAMN37368118	Complete Genome	REFSEQ	98.083	100	0	China	2010	Homo sapiens	XH1032	secretion
GCF_043051495.1	PRJNA224116	SAMN37368119	Complete Genome	REFSEQ	98.1085	99.7844	2.50191	China	2010	Homo sapiens	XH1033	sputum
GCF_043050845.1	PRJNA224116	SAMN37368120	Complete Genome	REFSEQ	97.9329	100	0.273973	China	2010	Homo sapiens	XH1034	sputum
GCF_043050195.1	PRJNA224116	SAMN37368121	Complete Genome	REFSEQ	98.1036	99.9813	0.622875	China	2010	Homo sapiens	XH1035	sputum
GCF_043049525.1	PRJNA224116	SAMN37368122	Complete Genome	REFSEQ	98.115	99.9813	0.609299	China	2010	Homo sapiens	XH1036	sputum
GCF_043048875.1	PRJNA224116	SAMN37368123	Complete Genome	REFSEQ	98.0975	99.9813	0.683118	China	2010	Homo sapiens	XH1037	bronchial lavage fluid
GCF_043048185.1	PRJNA224116	SAMN37368124	Complete Genome	REFSEQ	97.9903	100	0.136986	China	2010	Homo sapiens	XH1038	secretion
GCF_043047475.1	PRJNA224116	SAMN37368125	Complete Genome	REFSEQ	98.147	99.9655	0.609299	China	2010	Homo sapiens	XH1039	secretion
GCF_043046865.1	PRJNA224116	SAMN37368126	Complete Genome	REFSEQ	98.039	99.9375	0.609299	China	2010	Homo sapiens	XH1040	secretion
GCF_043046095.1	PRJNA224116	SAMN37368127	Complete Genome	REFSEQ	97.955	100	0	China	2010	Homo sapiens	XH1041	sputum
GCF_043045365.1	PRJNA224116	SAMN37368128	Complete Genome	REFSEQ	98.1091	99.925	0.609299	China	2010	Homo sapiens	XH1042	sputum
GCF_043044755.1	PRJNA224116	SAMN37368129	Complete Genome	REFSEQ	98.083	99.9813	1.22316	China	2010	Homo sapiens	XH1043	secretion
GCF_043044125.1	PRJNA224116	SAMN37368130	Complete Genome	REFSEQ	97.9397	100	0.273973	China	2010	Homo sapiens	XH1044	sputum
GCF_043043455.1	PRJNA224116	SAMN37368131	Complete Genome	REFSEQ	98.1072	99.9813	0.609299	China	2010	Homo sapiens	XH1045	sputum
GCF_043042805.1	PRJNA224116	SAMN37368132	Complete Genome	REFSEQ	97.9151	100	0	China	2010	Homo sapiens	XH1047	urine
GCF_043042175.1	PRJNA224116	SAMN37368133	Complete Genome	REFSEQ	98.0968	99.9813	0.609299	China	2010	Homo sapiens	XH1048	sputum
GCF_043041525.1	PRJNA224116	SAMN37368134	Complete Genome	REFSEQ	98.0407	99.9813	0.619939	China	2010	Homo sapiens	XH1050	wound
GCF_043040895.1	PRJNA224116	SAMN37368135	Complete Genome	REFSEQ	97.8173	100	0	China	2010	Homo sapiens	XH1051	sputum
GCF_043040285.1	PRJNA224116	SAMN37368136	Complete Genome	REFSEQ	98.0935	99.9813	0.609299	China	2010	Homo sapiens	XH1052	sputum
GCF_043039655.1	PRJNA224116	SAMN37368137	Complete Genome	REFSEQ	98.1084	99.9813	0.96363	China	2010	Homo sapiens	XH1054	urine
GCF_043038945.1	PRJNA224116	SAMN37368138	Complete Genome	REFSEQ	98.1224	99.932	0.609299	China	2010	Homo sapiens	XH1055	sputum
GCF_033192035.1	PRJNA224116	SAMN37643064	Complete Genome	REFSEQ	97.904	100	0	France	2021	-	ABO21-A001	oral swab
GCF_033191435.1	PRJNA224116	SAMN37643086	Complete Genome	REFSEQ	98.1314	99.9813	0.609299	France	2021	-	ABO21-A002	oral swab
GCF_033191195.1	PRJNA224116	SAMN37654775	Complete Genome	REFSEQ	98.1316	99.9813	0.609299	France	2021	-	ABO21-A003	oral swab
GCF_033190815.1	PRJNA224116	SAMN37654776	Complete Genome	REFSEQ	98.1315	99.9813	0.609299	France	2021	-	ABO21-A020	oral swab
GCF_033190675.1	PRJNA224116	SAMN37654777	Complete Genome	REFSEQ	98.1315	99.9813	0.609299	France	2021	-	ABO21-A022	oral swab
GCF_033190095.1	PRJNA224116	SAMN37654778	Complete Genome	REFSEQ	97.9475	100	0	France	2021	-	ABO21-A045	oral swab
GCF_033469325.1	PRJNA224116	SAMN37654779	Complete Genome	REFSEQ	97.8523	100	0.547945	France	2021	-	ABO21-A049	hospital environment
GCF_033190015.1	PRJNA224116	SAMN37654780	Complete Genome	REFSEQ	97.9324	100	0	France	2021	-	ABO21-A051	oral swab
GCF_033189995.1	PRJNA224116	SAMN37654781	Complete Genome	REFSEQ	98.1315	99.9813	0.609299	France	2021	-	ABO21-A057	oral swab
GCF_033189955.1	PRJNA224116	SAMN37654782	Complete Genome	REFSEQ	98.1456	99.1939	0.609299	France	2021	-	ABO21-A058	oral swab
GCF_033189435.1	PRJNA224116	SAMN37654783	Complete Genome	REFSEQ	98.1327	99.9813	0.609299	France	2021	-	ABO21-A059	oral swab
GCF_033188675.1	PRJNA224116	SAMN37654784	Complete Genome	REFSEQ	98.1323	99.9813	0.609299	France	2021	-	ABO21-A061	oral swab
GCF_033187975.1	PRJNA224116	SAMN37654785	Complete Genome	REFSEQ	98.1314	99.9813	0.609299	France	2021	-	ABO21-A063	oral swab
GCF_033187155.1	PRJNA224116	SAMN37654786	Complete Genome	REFSEQ	98.1315	99.9813	0.609299	France	2021	-	ABO21-A064	oral swab
GCF_032634445.1	PRJNA224116	SAMN37709326	Complete Genome	REFSEQ	98.1043	100	0	USA	2023	Homo sapiens	2023CK-01274	Wound/Abscess
GCF_045689335.1	PRJNA224116	SAMN37926894	Complete Genome	REFSEQ	98.1645	99.9813	0.628046	South Korea	2021	Homo sapiens	HPA0438	-
GCF_033612615.1	PRJNA224116	SAMN38047912	Complete Genome	REFSEQ	97.9463	100	0.319635	South Korea	2022	Plant	JBAB	missing
GCF_045689365.1	PRJNA224116	SAMN38122020	Complete Genome	REFSEQ	98.1102	100	0	USA	2023	Homo sapiens	2023CK-01292	urine
GCF_034081005.1	PRJNA224116	SAMN38345631	Complete Genome	REFSEQ	97.8789	100	0	China	2022	chicken	HNZZ130D	throat swab
GCF_034083075.1	PRJNA224116	SAMN38345664	Complete Genome	REFSEQ	99.8535	100	0	China	2022	chicken	HNNY86G	throat swab
GCF_034422775.1	PRJNA224116	SAMN38635275	Complete Genome	REFSEQ	97.9017	100	0	Germany	2017	Homo sapiens	Nord12-3	-
GCF_034422815.1	PRJNA224116	SAMN38635811	Complete Genome	REFSEQ	97.8601	100	0.684932	Germany	2017	Homo sapiens	B84	-
GCF_034126645.1	PRJNA224116	SAMN38646042	Complete Genome	REFSEQ	98.0811	99.9813	1.3967	USA	2023	Homo sapiens	2023CK-01487	skin
GCF_034126905.1	PRJNA224116	SAMN38646043	Complete Genome	REFSEQ	98.0821	99.9813	1.3967	USA	2023	Homo sapiens	2023CK-01486	skin
GCF_034331205.1	PRJNA224116	SAMN38788845	Complete Genome	REFSEQ	98.1041	100	0	USA	2023	Homo sapiens	2023CK-01512	skin
GCF_035937495.1	PRJNA224116	SAMN38865782	Complete Genome	REFSEQ	97.8973	99.9087	0.410959	Pakistan	2017	Homo sapiens	38	endotracheal tube
GCF_035666135.1	PRJNA224116	SAMN39285741	Complete Genome	REFSEQ	97.9582	100	0	China	2023	-	EMB-1	missing
GCF_037039675.1	PRJNA224116	SAMN39325193	Complete Genome	REFSEQ	98.0791	98.9667	1.93257	South Korea	2020	-	G20AB08	human
GCF_036870965.1	PRJNA224116	SAMN39325909	Complete Genome	REFSEQ	98.132	99.5876	0.609299	South Korea	2020	Homo sapiens	A20AB02	missing
GCF_035753605.1	PRJNA224116	SAMN39326139	Complete Genome	REFSEQ	98.0956	99.951	1.003	South Korea	2020	Homo sapiens	A20AB13	missing
GCF_036287255.1	PRJNA224116	SAMN39326197	Complete Genome	REFSEQ	98.1207	99.9025	0.609299	South Korea	2020	Homo sapiens	B20AB01	missing
GCF_036287275.1	PRJNA224116	SAMN39326236	Complete Genome	REFSEQ	98.0869	99.9813	0.609299	South Korea	2020	Homo sapiens	B20AB10	missing
GCF_035754475.1	PRJNA224116	SAMN39326237	Complete Genome	REFSEQ	98.1619	99.5876	0.628046	South Korea	2020	Homo sapiens	C20AB01	missing
GCF_036601155.1	PRJNA224116	SAMN39855183	Complete Genome	REFSEQ	97.8973	100	0	USA	2008	Homo sapiens	AB5075	tibia/osteomyelitis of diabetes patient
GCF_036602705.1	PRJNA224116	SAMN39855236	Complete Genome	REFSEQ	97.8973	100	0	United Kingdom	2021	Homo sapiens	AB5075	Agar plate
GCF_036718155.1	PRJNA224116	SAMN39998251	Complete Genome	REFSEQ	97.9386	99.9087	0	USA	2024	Homo sapiens	2024CK-00130	Wound/Abscess
GCF_037008665.1	PRJNA224116	SAMN40254323	Complete Genome	REFSEQ	98.1026	100	0	USA	2024	Homo sapiens	2024CK-00250	sputum
GCF_037008745.1	PRJNA224116	SAMN40254326	Complete Genome	REFSEQ	98.0357	100	0	USA	2024	Homo sapiens	2024CK-00246	skin
GCF_037215885.1	PRJNA224116	SAMN40374610	Complete Genome	REFSEQ	98.1265	99.9813	0.628046	China	2021	Homo sapiens	LZFZ3604	-
GCF_039654205.1	PRJNA224116	SAMN40443483	Complete Genome	REFSEQ	98.1019	100	0	USA	2024	Homo sapiens	2024CK-00247	skin
GCF_045345925.1	PRJNA224116	SAMN40518041	Complete Genome	REFSEQ	97.9643	100	0.136986	China	2021	-	HAU425	soil
GCF_037429075.1	PRJNA224116	SAMN40557119	Complete Genome	REFSEQ	98.0344	100	0	USA	2024	Homo sapiens	2024CK-00278	Tracheal Aspirate/Wash
GCF_039518815.1	PRJNA224116	SAMN40557123	Complete Genome	REFSEQ	98.1526	99.9813	0.628046	USA	2024	Homo sapiens	2024CK-00319	Wound/Abscess
GCF_037939845.1	PRJNA224116	SAMN40558820	Complete Genome	REFSEQ	97.9362	100	0	China	2021	Homo sapiens	AB7276	missing
GCF_037751415.1	PRJNA224116	SAMN40632425	Complete Genome	REFSEQ	98.1029	100	0	USA	2024	Homo sapiens	2024CK-00329	Wound/Abscess
GCF_038069255.1	PRJNA224116	SAMN40921370	Complete Genome	REFSEQ	98.1563	99.9813	0.628046	USA	2024	Homo sapiens	2024CK-00376	sputum
GCF_038069235.1	PRJNA224116	SAMN40921371	Complete Genome	REFSEQ	98.1549	99.9813	0.628046	USA	2024	Homo sapiens	2024CK-00375	other
GCF_038442635.1	PRJNA224116	SAMN40971035	Complete Genome	REFSEQ	97.8778	100	0	France	2014	cat	F14-11	urine
GCF_038442585.1	PRJNA224116	SAMN40971036	Complete Genome	REFSEQ	97.878	100	0	France	2015	cat	F15-01A	urine
GCF_038442575.1	PRJNA224116	SAMN40971037	Complete Genome	REFSEQ	97.8755	100	0	France	2015	cat	F15-01B	urine
GCF_038442565.1	PRJNA224116	SAMN40971038	Complete Genome	REFSEQ	97.8755	100	0	France	2015	cat	F15-02	urine
GCF_038442555.1	PRJNA224116	SAMN40971039	Complete Genome	REFSEQ	97.8775	100	0	France	2015	cat	F15-06	urine
GCF_038442425.1	PRJNA224116	SAMN40971040	Complete Genome	REFSEQ	97.8755	100	0	France	2016	cat	F16-05	urine
GCF_038442415.1	PRJNA224116	SAMN40971041	Complete Genome	REFSEQ	97.8781	100	0	France	2018	cat	F18-02	urine
GCF_038442405.1	PRJNA224116	SAMN40971042	Complete Genome	REFSEQ	97.9091	100	0	France	2019	cat	F19-02	urine
GCF_038442395.1	PRJNA224116	SAMN40971043	Complete Genome	REFSEQ	97.8839	100	0	France	2019	cat	F19-10-2	urine
GCF_038442385.1	PRJNA224116	SAMN40971044	Complete Genome	REFSEQ	97.9826	100	0	France	2019	cat	F19-10-4	urine
GCF_038442375.1	PRJNA224116	SAMN40971045	Complete Genome	REFSEQ	97.9056	100	0	France	2019	cat	F19-10-8	urine
GCF_038442305.1	PRJNA224116	SAMN40971046	Complete Genome	REFSEQ	97.8837	100	0	France	2019	cat	F19-10-9	urine
GCF_038442295.1	PRJNA224116	SAMN40971047	Complete Genome	REFSEQ	97.9798	100	0	France	2019	cat	F19-10-MH6	urine
GCF_038442285.1	PRJNA224116	SAMN40971048	Complete Genome	REFSEQ	97.893	99.726	0	France	2019	cat	F19-10-MH12	urine
GCF_038442275.1	PRJNA224116	SAMN40971049	Complete Genome	REFSEQ	97.8846	100	0	France	2019	cat	F19-10-CH3	urine
GCF_038442265.1	PRJNA224116	SAMN40971050	Complete Genome	REFSEQ	97.8751	100	0	France	2019	cat	F19-10-CH6	urine
GCF_038442235.1	PRJNA224116	SAMN40971051	Complete Genome	REFSEQ	97.8882	100	0	France	2019	cat	F19-10-CH8	urine
GCF_038442225.1	PRJNA224116	SAMN40971052	Complete Genome	REFSEQ	97.8632	100	0	France	2015	dog	40288-CIRI	urine
GCF_038418265.1	PRJNA224116	SAMN41020280	Complete Genome	REFSEQ	98.1546	99.9813	0.628046	USA	2024	Homo sapiens	2024CK-00452	Wound/Abscess
GCF_038418285.1	PRJNA224116	SAMN41020282	Complete Genome	REFSEQ	98.1221	99.9813	0.628046	USA	2024	Homo sapiens	2024CK-00461	blood
GCF_038418365.1	PRJNA224116	SAMN41020287	Complete Genome	REFSEQ	98.1359	100	0	USA	2024	Homo sapiens	2024CK-00462	other
GCF_038627255.1	PRJNA224116	SAMN41094844	Complete Genome	REFSEQ	98.1402	99.9813	1.003	USA	2024	Homo sapiens	2024CK-00538	other
GCF_038522965.1	PRJNA224116	SAMN41094845	Complete Genome	REFSEQ	98.1394	99.9813	1.003	USA	2024	Homo sapiens	2024CK-00537	other
GCF_038627275.1	PRJNA224116	SAMN41094846	Complete Genome	REFSEQ	98.1394	99.9813	1.003	USA	2024	Homo sapiens	2024CK-00536	other
GCF_038627335.1	PRJNA224116	SAMN41094848	Complete Genome	REFSEQ	98.0332	100	0.273973	USA	2024	Homo sapiens	2024CK-00546	sputum
GCF_039545565.1	PRJNA224116	SAMN41107056	Complete Genome	REFSEQ	97.825	100	0	Viet Nam	2007	Homo sapiens	NCSR_106	Carriage
GCF_039701065.1	PRJNA224116	SAMN41377726	Complete Genome	REFSEQ	98.1328	99.9813	1.02175	China	2024	-	TY918	sputum
GCF_039779435.1	PRJNA224116	SAMN41384381	Complete Genome	REFSEQ	97.9107	100	0	Australia	2010	Homo sapiens	D78	Unknown
GCF_039780165.1	PRJNA224116	SAMN41384382	Complete Genome	REFSEQ	97.8982	100	0	Australia	2009	Homo sapiens	D13	urine
GCF_040529325.1	PRJNA224116	SAMN41724871	Complete Genome	REFSEQ	98.1292	99.9813	1.08736	China	2022	Homo sapiens	-	Sputums
GCF_040267665.1	PRJNA224116	SAMN41726357	Complete Genome	REFSEQ	98.1291	99.9813	1.08736	China	2022	Homo sapiens	NAB02B	Sputums
GCF_040529205.1	PRJNA224116	SAMN41726358	Complete Genome	REFSEQ	98.129	99.9813	1.08736	China	2022	Homo sapiens	NAB03B	Sputums
GCF_040529215.1	PRJNA224116	SAMN41726359	Complete Genome	REFSEQ	98.129	99.9813	1.08736	China	2022	Homo sapiens	NAB04B	Sputums
GCF_040536945.1	PRJNA224116	SAMN41726360	Complete Genome	REFSEQ	98.129	99.9813	1.08736	China	2022	Homo sapiens	NAB05B	Sputums
GCF_040536955.1	PRJNA224116	SAMN41726361	Complete Genome	REFSEQ	98.1291	99.9813	1.08736	China	2022	Homo sapiens	NAB06B	Sputums
GCF_040529225.1	PRJNA224116	SAMN41726407	Complete Genome	REFSEQ	98.1291	99.9813	1.08736	China	2022	Homo sapiens	NAB07B	Sputums
GCF_040536965.1	PRJNA224116	SAMN41726427	Complete Genome	REFSEQ	98.1291	99.9813	1.08736	China	2022	Homo sapiens	NAB01B-R1	Sputums
GCF_040529235.1	PRJNA224116	SAMN41726429	Complete Genome	REFSEQ	98.1292	99.9813	1.08736	China	2022	Homo sapiens	NAB01B-R1	Sputums
GCF_040529265.1	PRJNA224116	SAMN41726437	Complete Genome	REFSEQ	98.1277	99.9156	1.08736	China	2022	Homo sapiens	NAB01B-R4	Sputums
GCF_040529255.1	PRJNA224116	SAMN41726438	Complete Genome	REFSEQ	98.1275	99.9156	1.08736	China	2022	Homo sapiens	NAB01B-R5	Sputums
GCF_040529275.1	PRJNA224116	SAMN41726557	Complete Genome	REFSEQ	98.1272	99.85	1.08736	China	2022	Homo sapiens	NAB01B-R6	Sputums
GCF_040529295.1	PRJNA224116	SAMN41726558	Complete Genome	REFSEQ	98.1283	99.9813	1.08736	China	2022	Homo sapiens	NAB01B-R7	Sputums
GCF_040529285.1	PRJNA224116	SAMN41726560	Complete Genome	REFSEQ	98.1292	99.9813	1.08736	China	2022	Homo sapiens	NAB01B-R8	Sputums
GCF_040529305.1	PRJNA224116	SAMN41726561	Complete Genome	REFSEQ	98.1291	99.9813	1.08736	China	2022	Homo sapiens	NAB01B-R9	Sputums
GCF_040529315.1	PRJNA224116	SAMN41726562	Complete Genome	REFSEQ	98.1279	99.5876	1.08736	China	2022	Homo sapiens	NAB01B-R10	Sputums
GCF_042147245.1	PRJNA224116	SAMN41934837	Complete Genome	REFSEQ	97.9112	98.6301	0	Greece	2017	Homo sapiens	Rp376	Urinary source
GCF_042147895.1	PRJNA224116	SAMN41934838	Complete Genome	REFSEQ	98.1068	100	0.684932	missing	missing	Homo sapiens	Rp426	missing
GCF_042148545.1	PRJNA224116	SAMN41934839	Complete Genome	REFSEQ	98.1635	100	0.228311	USA	2019	Homo sapiens	Rp428	urine
GCF_042149195.1	PRJNA224116	SAMN41934840	Complete Genome	REFSEQ	98.0772	99.9813	0.609299	USA	2019	Homo sapiens	Rp436	Respiratory/sputum
GCF_042149725.1	PRJNA224116	SAMN41934841	Complete Genome	REFSEQ	98.1234	99.5876	0.609299	USA	2020	Homo sapiens	Rp654	respiratory
GCF_042151085.1	PRJNA224116	SAMN41934843	Complete Genome	REFSEQ	97.9617	99.9087	0.821918	France	2022	Homo sapiens	Rp772	Respiratory/Bronchial aspirate
GCF_042151695.1	PRJNA224116	SAMN41934844	Complete Genome	REFSEQ	98.0169	100	0	USA	2018	Homo sapiens	Rp779	respiratory
GCF_042152325.1	PRJNA224116	SAMN41934845	Complete Genome	REFSEQ	97.9572	100	0.958904	USA	missing	Homo sapiens	Up280	Urinary source/catheter isolate
GCF_042153585.1	PRJNA224116	SAMN41934847	Complete Genome	REFSEQ	97.9473	100	0	Argentina	2018	Homo sapiens	Up377	tracheal aspirate
GCF_042142835.1	PRJNA224116	SAMN41934856	Complete Genome	REFSEQ	97.9061	100	0	Bolivia	2016	Homo sapiens	Lv347	Respiratory/sputum
GCF_042143465.1	PRJNA224116	SAMN41934857	Complete Genome	REFSEQ	97.9838	100	0.136986	France	2016	Homo sapiens	Lv371	Urinary source
GCF_042144055.1	PRJNA224116	SAMN41934860	Complete Genome	REFSEQ	98.0267	100	0	USA	2019	Homo sapiens	Lv419	Urinary source
GCF_042145845.1	PRJNA224116	SAMN41934864	Complete Genome	REFSEQ	98.1177	100	0	USA	2020	Homo sapiens	Lv647	respiratory
GCF_042146535.1	PRJNA224116	SAMN41934865	Complete Genome	REFSEQ	97.9308	100	0.273973	USA	2020	Homo sapiens	Lv648	respiratory
GCF_042140285.1	PRJNA224116	SAMN41934866	Complete Genome	REFSEQ	97.9213	100	0.410959	Belgium	2017	Homo sapiens	Hv373	Urinary source
GCF_042140325.1	PRJNA224116	SAMN41934868	Complete Genome	REFSEQ	97.9448	100	0.136986	missing	missing	Homo sapiens	Hv431	missing
GCF_042140455.1	PRJNA224116	SAMN41934869	Complete Genome	REFSEQ	97.934	100	0	missing	missing	Homo sapiens	Hv455	missing
GCF_042140485.1	PRJNA224116	SAMN41934870	Complete Genome	REFSEQ	97.9283	100	0.410959	USA	2020	Homo sapiens	Hv635	respiratory
GCF_042140495.1	PRJNA224116	SAMN41934872	Complete Genome	REFSEQ	97.9297	100	0.136986	USA	2020	Homo sapiens	Hv640	respiratory
GCF_042140525.1	PRJNA224116	SAMN41934873	Complete Genome	REFSEQ	98.1078	99.9813	0.628046	USA	2020	Homo sapiens	Hv652	respiratory
GCF_042140575.1	PRJNA224116	SAMN41934874	Complete Genome	REFSEQ	97.8558	100	0.136986	France	2018	Homo sapiens	Hv766	respiratory
GCF_042140585.1	PRJNA224116	SAMN41934875	Complete Genome	REFSEQ	98.0432	99.6347	0	France	2022	Homo sapiens	Hv770	respiratory
GCF_042141115.1	PRJNA224116	SAMN41934876	Complete Genome	REFSEQ	97.9408	100	0.136986	USA	2018	Homo sapiens	Hv780	respiratory
GCF_042141315.1	PRJNA224116	SAMN41934877	Complete Genome	REFSEQ	97.9437	100	0.136986	USA	2018	Homo sapiens	Hv781	respiratory
GCF_042141555.1	PRJNA224116	SAMN41934878	Complete Genome	REFSEQ	97.9327	100	0.136986	USA	2019	Homo sapiens	Hv782	respiratory
GCF_042142205.1	PRJNA224116	SAMN41936527	Complete Genome	REFSEQ	97.8351	100	0.547945	missing	missing	Homo sapiens	HvAb04	missing
GCF_040543095.1	PRJNA224116	SAMN42110409	Complete Genome	REFSEQ	97.99	100	0.136986	Egypt	2023	Homo sapiens	AB11-AUFP	swab
GCF_041014305.2	PRJNA224116	SAMN42110417	Complete Genome	REFSEQ	97.9122	100	0.821918	Egypt	2023	Homo sapiens	AB37-AUFP	blood
GCF_040703085.1	PRJNA224116	SAMN42110418	Complete Genome	REFSEQ	97.9739	100	0.136986	Egypt	2023	Homo sapiens	AB44-AUFP	MiniBAL
GCF_040536855.1	PRJNA224116	SAMN42110440	Complete Genome	REFSEQ	98.1248	99.9813	0.628046	China	2022	Homo sapiens	Ab6-Co-2	-
GCF_041004195.1	PRJNA224116	SAMN42440400	Complete Genome	REFSEQ	98.1492	99.9813	0.628046	China	2020	Homo sapiens	W155	feces
GCF_040834015.1	PRJNA224116	SAMN42510403	Complete Genome	REFSEQ	97.8682	100	0	Singapore	2010	Homo sapiens	SIMBA089	not available
GCF_040930415.1	PRJNA224116	SAMN42510872	Complete Genome	REFSEQ	97.9778	100	0.273973	Singapore	2010	Homo sapiens	SIMBA113	not available
GCF_040822125.1	PRJNA224116	SAMN42510874	Complete Genome	REFSEQ	97.8952	100	0	Singapore	2006	Homo sapiens	SIMBA003	not available
GCF_040822395.1	PRJNA224116	SAMN42510875	Complete Genome	REFSEQ	97.8741	100	0	Singapore	2008	Homo sapiens	SIMBA028	not available
GCF_040822405.1	PRJNA224116	SAMN42510876	Complete Genome	REFSEQ	98.1009	99.9813	0.628046	Singapore	2008	Homo sapiens	SIMBA034	not available
GCF_040822385.1	PRJNA224116	SAMN42510942	Complete Genome	REFSEQ	97.9057	100	0	Singapore	2008	Homo sapiens	SIMBA035	not available
GCF_040822435.1	PRJNA224116	SAMN42510943	Complete Genome	REFSEQ	98.0878	100	0	Singapore	2009	Homo sapiens	SIMBA061	not available
GCF_041801535.1	PRJNA224116	SAMN42799853	Complete Genome	REFSEQ	97.8595	100	0.136986	China	2021	chickens	Y03	Temperate monsoon climate
GCF_041927285.1	PRJNA224116	SAMN43539523	Complete Genome	REFSEQ	98.091	100	1.23288	Argentina	2021	Homo sapiens	AMA205	sputum
GCF_041930545.1	PRJNA224116	SAMN43543506	Complete Genome	REFSEQ	98.0434	100	0	China	2023	-	H3	rhizosphere soil
GCF_043571745.1	PRJNA224116	SAMN44252171	Complete Genome	REFSEQ	98.0998	99.925	0.628046	Turkey	2023	Homo sapiens	T3	wound
GCF_043572315.1	PRJNA224116	SAMN44252301	Complete Genome	REFSEQ	97.9566	100	0	Turkey	2023	Homo sapiens	T14	Broncho alveoler lavaj
GCF_043572945.1	PRJNA224116	SAMN44252320	Complete Genome	REFSEQ	97.9567	100	0	Turkey	2023	Homo sapiens	T24	blood
GCF_043950125.1	PRJNA224116	SAMN44339198	Complete Genome	REFSEQ	98.1225	99.9813	0.609299	China	2024	Homo sapiens	AB50533	bile
GCF_045256945.1	PRJNA224116	SAMN44611873	Complete Genome	REFSEQ	98.1058	99.9813	0.628046	USA	2018	-	G636	Respiratory sample
GCF_045037785.1	PRJNA224116	SAMN44702419	Complete Genome	REFSEQ	97.9	100	0	South Korea	2018	Homo sapiens	CRAB_1	blood
GCF_046097195.1	PRJNA224116	SAMN45068461	Complete Genome	REFSEQ	97.8941	100	0	Australia	2002	Homo sapiens	G7	Unknown
GCF_046097545.1	PRJNA224116	SAMN45068613	Complete Genome	REFSEQ	98.0692	99.5876	0.6879	Viet Nam	2009	Homo sapiens	BAL114	Unknown
GCF_046097205.1	PRJNA224116	SAMN45068614	Complete Genome	REFSEQ	98.0597	100	0	USA	2009	Homo sapiens	HUMC1	Unknown
GCF_046097165.1	PRJNA224116	SAMN45068615	Complete Genome	REFSEQ	98.0908	100	0	Netherlands	Unknown	Homo sapiens	LUH5537	Unknown
GCF_046097185.1	PRJNA224116	SAMN45068616	Complete Genome	REFSEQ	98.0381	100	0	USA	2007	Homo sapiens	NIH1	Unknown
GCF_046097175.1	PRJNA224116	SAMN45068617	Complete Genome	REFSEQ	98.0925	100	0	USA	2008	Homo sapiens	UMB001	blood
GCA_027943705.1	PRJDB10765	SAMD00414017	Complete Genome	GENBANK	98.0938	95.8257	0.482476	Japan	2016	Homo sapiens	OCU-Ac20	-
GCA_000307975.2	PRJNA173033	SAMN02471421	Complete Genome	GENBANK	98.1422	99.9813	0.628046	Malaysia	2011	Homo sapiens	AC30	endotracheal secretion from a patient at Hospital Sultanah Nur Zahirah
GCA_000189735.2	PRJNA62279	SAMN02603891	Complete Genome	GENBANK	98.0963	99.9813	1.44826	-	-	-	TCDC-AB0715	-
GCA_000015425.1	PRJNA17477	SAMN02604331	Complete Genome	GENBANK	97.9896	99.6477	0.410959	-	-	-	ATCC 17978	-
GCA_000939415.2	PRJNA271775	SAMN03277095	Complete Genome	GENBANK	98.1058	99.9455	1.003	USA	2012	Homo sapiens	ORAB01	bodily fluid
GCA_002009115.1	PRJNA311034	SAMN04457967	Complete Genome	GENBANK	98.1453	98.787	0.816695	Not collected	2015	Homo sapiens	AB34299	Not collected
GCA_001806425.1	PRJNA339687	SAMN05601670	Complete Genome	GENBANK	98.0665	99.7357	0.609299	South Korea	2015	Homo sapiens	KAB05	blood
GCA_002762545.2	PRJNA417137	SAMN07977426	Complete Genome	GENBANK	98.087	99.6532	0.628046	India	2015	Homo sapiens	VB23193	blood
GCA_044232175.1	PRJNA434082	SAMN08536131	Complete Genome	GENBANK	98.1239	99.5088	0.638687	Nepal	2017	-	SSRI1	-
GCA_003012895.3	PRJNA437037	SAMN08637743	Complete Genome	GENBANK	97.9844	98.758	0	India	2005	-	DS002	soil
GCA_003359255.2	PRJNA459525	SAMN09069680	Complete Genome	GENBANK	97.9618	95.781	0.273973	Taiwan	2008	Homo sapiens	2008S11-069	-
GCA_003812065.1	PRJNA231221	SAMN10163233	Complete Genome	GENBANK	97.9621	99.4521	0.273973	not applicable	Unknown	Homo sapiens	FDAARGOS_540	clinical isolate
GCA_003627485.2	PRJNA494506	SAMN10170272	Complete Genome	GENBANK	98.0898	99.9419	0.792088	India	2017	Homo sapiens	VB31459	blood
GCA_005280355.1	PRJNA540743	SAMN11554497	Complete Genome	GENBANK	98.1162	99.9596	1.79112	India	2019	Homo sapiens	VB958	blood
GCA_005280375.1	PRJNA540755	SAMN11554995	Complete Genome	GENBANK	98.123	99.9126	1.59598	India	2019	Homo sapiens	VB1190	blood
GCA_005280395.1	PRJNA540771	SAMN11557490	Complete Genome	GENBANK	97.7583	99.8239	1.21331	India	2018	Homo sapiens	VB35179	blood
GCA_005280415.1	PRJNA540773	SAMN11557585	Complete Genome	GENBANK	97.8435	99.4521	0	India	2018	Homo sapiens	VB35435	blood
GCA_005280715.1	PRJNA541079	SAMN11571817	Complete Genome	GENBANK	98.1118	99.8828	0.628046	India	2018	Homosapiens	VB35575	blood
GCA_008802935.1	PRJNA573751	SAMN12825295	Complete Genome	GENBANK	98.0722	99.6347	0	Cambodia	2016	Homo sapiens	CAM180-1	oral cavity
GCA_009833005.1	PRJNA575861	SAMN12912378	Complete Genome	GENBANK	97.9056	100	0.821918	Canada	2015	Homo sapiens	AbCAN2	Coccygeal isolate
GCA_013403505.1	PRJNA643902	SAMN15437745	Complete Genome	GENBANK	97.8266	99.726	0	Canada	2006	Homo sapiens	ATCC BAA1605	sputum
GCA_016864335.2	PRJNA644570	SAMN15501055	Complete Genome	GENBANK	98.0823	97.5342	0.273973	France	2015	Homo sapiens	AbCTX5	Catheter
GCA_017098245.2	PRJNA646312	SAMN15538697	Complete Genome	GENBANK	98.0892	99.858	0.628046	China	2018	Homo sapiens	2018HLJAB2	abdominal fluid
GCA_017098225.2	PRJNA646312	SAMN15538698	Complete Genome	GENBANK	98.0399	99.8828	1.003	China	2018	Homo sapiens	2018HBAB1	abdominal fluid
GCA_017098185.2	PRJNA646312	SAMN15538699	Complete Genome	GENBANK	98.0909	99.9813	0.628046	China	2016	Homo sapiens	2016BJAB1	sputum
GCA_017096345.2	PRJNA646312	SAMN15538703	Complete Genome	GENBANK	98.1423	99.4483	0.628046	China	2014	Homo sapiens	2014TJAB1	blood
GCA_017096365.2	PRJNA646312	SAMN15538704	Complete Genome	GENBANK	98.1306	99.9813	0.628046	China	2018	Homo sapiens	2018TJAB1	blood
GCA_017096405.2	PRJNA646312	SAMN15538705	Complete Genome	GENBANK	98.1247	99.7275	0.628046	China	2018	Homo sapiens	2018BJAB1	sputum
GCA_017096325.2	PRJNA646312	SAMN15538706	Complete Genome	GENBANK	98.1542	99.9813	0.628046	China	2018	Homo sapiens	2018BJAB2	bronchial
GCA_019903235.1	PRJNA607827	SAMN15646565	Complete Genome	GENBANK	98.1744	99.726	0.273973	Finland	na	-	E-072658	paper pulp mill
GCA_014882805.2	PRJNA667024	SAMN16351083	Complete Genome	GENBANK	98.1948	100	0.0913242	USA	2018	Homo sapiens	ARLG_6295	respiratory
GCA_014881055.2	PRJNA667024	SAMN16351130	Complete Genome	GENBANK	98.1106	100	0	USA	2018	Homo sapiens	ARLG_6344	blood
GCA_014880215.2	PRJNA667024	SAMN16351204	Complete Genome	GENBANK	97.9299	100	0.136986	USA	2018	Homo sapiens	ARLG_6420	blood
GCA_015356075.1	PRJNA672694	SAMN16574826	Complete Genome	GENBANK	97.8544	95.4448	0.0249066	USA	2018	Homo sapiens	SD	clinical isolate
GCA_021387885.2	PRJNA734772	SAMN19523478	Complete Genome	GENBANK	98.0996	99.9813	0.609299	China	2018	Homo sapiens	R4-1	Hospital_ICU
GCA_021387855.2	PRJNA734772	SAMN19523479	Complete Genome	GENBANK	98.0967	99.9813	0.609299	China	2018	Homo sapiens	R6-1	Hospital_ICU
GCA_021484925.1	PRJNA742487	SAMN20178847	Complete Genome	GENBANK	97.8606	98.3704	0.273973	USA	2021	-	MRSN 56	Laboratory passage
GCA_028752795.1	PRJNA729463	SAMN20255405	Complete Genome	GENBANK	98.0867	99.8494	0.609299	Australia	2004	Homo sapiens	4117201	-
GCA_022461025.2	PRJNA798866	SAMN25131632	Complete Genome	GENBANK	98.1324	99.5876	0.609299	Belgium	2017	Homo sapiens	AB3-VUB	-
GCA_022460875.2	PRJNA798866	SAMN25131633	Complete Genome	GENBANK	98.0819	100	0	Belgium	2014	Homo sapiens	AB9-VUB	-
GCA_022460745.2	PRJNA798866	SAMN25131634	Complete Genome	GENBANK	98.0828	100	0	Belgium	2014	Homo sapiens	AB14-VUB	-
GCA_022460435.2	PRJNA798866	SAMN25131636	Complete Genome	GENBANK	98.0675	100	0	Belgium	2014	Homo sapiens	AB20-VUB	-
GCA_022460155.2	PRJNA798866	SAMN25131638	Complete Genome	GENBANK	98.002	100	0.136986	Belgium	2014	Homo sapiens	AB32-VUB	-
GCA_022459755.2	PRJNA798866	SAMN25131641	Complete Genome	GENBANK	98.0379	100	0.273973	Belgium	2014	Homo sapiens	AB40-VUB	-
GCA_022459115.2	PRJNA798866	SAMN25131648	Complete Genome	GENBANK	98.033	100	0	Belgium	2017	Homo sapiens	AB176-VUB	-
GCA_022468985.2	PRJNA798866	SAMN25131654	Complete Genome	GENBANK	97.8553	100	0.410959	Belgium	2017	Homo sapiens	AB186-VUB	-
GCA_022468855.2	PRJNA798866	SAMN25131655	Complete Genome	GENBANK	98.0782	100	0	Belgium	2017	Homo sapiens	AB187-VUB	-
GCA_022468835.2	PRJNA798866	SAMN25131656	Complete Genome	GENBANK	98.0807	100	0	Belgium	2017	Homo sapiens	AB188-VUB	-
GCA_022468645.2	PRJNA798866	SAMN25131659	Complete Genome	GENBANK	98.0902	99.9813	0.609299	Belgium	2017	Homo sapiens	AB194-VUB	-
GCA_022467375.2	PRJNA798866	SAMN25131673	Complete Genome	GENBANK	97.9118	100	0	Belgium	2017	Homo sapiens	AB232-VUB	-
GCA_023273785.1	PRJNA314151	SAMN27925156	Complete Genome	GENBANK	98.1075	98.8001	0.619939	China	2015	Homo sapiens	XH1820	sputum
GCA_024137925.1	PRJNA851068	SAMN29213188	Complete Genome	GENBANK	98.0786	97.6127	0.215598	South Korea	Not available	Homo sapiens	F-1629	Not available
GCA_024126255.1	PRJNA851068	SAMN29272488	Complete Genome	GENBANK	98.0957	98.4713	0.609299	South Korea	2013	Homo sapiens	NCCP 15989	sputum
GCA_024126235.1	PRJNA851068	SAMN29272847	Complete Genome	GENBANK	98.0662	97.812	0.848056	South Korea	2013	Homo sapiens	NCCP 15992	Not available
GCA_024126275.1	PRJNA851068	SAMN29325273	Complete Genome	GENBANK	98.0563	97.2604	0.456193	South Korea	2013	Homo sapiens	NCCP 15995	Not available
GCA_024126295.1	PRJNA851068	SAMN29325381	Complete Genome	GENBANK	98.1199	98.7223	0.234346	South Korea	2013	Homo sapiens	NCCP 15996	urine
GCA_024126315.1	PRJNA851068	SAMN29325385	Complete Genome	GENBANK	98.075	97.9217	1.12017	South Korea	2011	Homo sapiens	NCCP 16006	Not available
GCA_024125815.1	PRJNA851068	SAMN29327161	Complete Genome	GENBANK	98.0722	98.1028	0.303087	South Korea	2011	Homo sapiens	NCCP 16011	Not available
GCA_024505625.1	PRJNA677881	SAMN29977860	Complete Genome	GENBANK	97.9912	98.9954	1.27202	Brazil	2021	Homo sapiens	CCBH31258	catheter tip
GCA_028201695.1	PRJNA548006	SAMN32745367	Complete Genome	GENBANK	98.0235	95.8617	1.12527	China	2022	Homo sapiens	37662RM1d21	Labatory, 37662RM1 cultured in medium without carbapenem
GCA_028201675.1	PRJNA548006	SAMN32745368	Complete Genome	GENBANK	98.0176	96.1624	1.44484	China	2022	Homo sapiens	37662RM2d21	Labatory, 37662RM2 cultured in medium without carbapenem
GCA_028051765.3	PRJNA288601	SAMN32801357	Complete Genome	GENBANK	98.1129	100	0	USA	2022	Homo sapiens	2023CK-00003	Tissue
GCA_028051805.3	PRJNA288601	SAMN32801359	Complete Genome	GENBANK	98.1328	99.863	0	USA	2022	Homo sapiens	2023CK-00001	Tissue
GCA_029168475.1	PRJNA938819	SAMN33446574	Complete Genome	GENBANK	97.8267	99.0868	0	Taiwan	2001	Homo sapiens	AB322	blood
GCA_037039585.1	PRJNA1062970	SAMN39325114	Complete Genome	GENBANK	98.0584	98.5913	0.609299	South Korea	2020	-	F20AB03	human
GCA_035755505.1	PRJNA1063011	SAMN39326218	Complete Genome	GENBANK	98.0901	97.6401	0.628046	South Korea	2020	Homo sapiens	B20AB06	missing
GCA_036320755.1	PRJNA1063014	SAMN39326238	Complete Genome	GENBANK	97.915	98.7808	0	South Korea	2020	Homo sapiens	C20AB05	missing
GCA_036584025.1	PRJNA565663	SAMN39837003	Complete Genome	GENBANK	98.0663	100	0	not available	2017	-	PUMA0246	not available
GCA_036701095.1	PRJNA565663	SAMN39861921	Complete Genome	GENBANK	97.9066	100	0.0684932	not available	2019	-	PUMA0247	not available
GCA_036689575.1	PRJNA565663	SAMN39861927	Complete Genome	GENBANK	97.8255	100	0	not available	2019	-	PUMA0248	not available
GCA_040529245.1	PRJNA1121085	SAMN41726430	Complete Genome	GENBANK	98.1473	98.2752	1.08736	China	2022	Homo sapiens	NAB01B-R3	Sputums
GCA_043006125.1	PRJNA854605	SAMN41918902	Complete Genome	GENBANK	98.129	99.1309	0.234346	Thailand	2016/2017	Homo sapiens	MTC0608	sputum
GCA_040957165.1	PRJNA854605	SAMN41918903	Complete Genome	GENBANK	98.1301	98.9403	0.651205	Thailand	2016/2017	Homo sapiens	MTC0609	sputum
GCA_043007235.1	PRJNA854605	SAMN41918907	Complete Genome	GENBANK	98.0507	98.9009	0.257505	Thailand	2016/2017	Homo sapiens	MTC0617	sputum
GCA_040956955.1	PRJNA854605	SAMN41918908	Complete Genome	GENBANK	98.1199	99.0284	0.669953	Thailand	2016/2017	Homo sapiens	MTC0620	sputum
GCA_040956925.1	PRJNA854605	SAMN41918910	Complete Genome	GENBANK	98.1357	99.0252	0.215598	Thailand	2016/2017	Homo sapiens	MTC0629	sputum
GCA_040956905.1	PRJNA854605	SAMN41918911	Complete Genome	GENBANK	98.1214	98.7316	0.276252	Thailand	2016/2017	Homo sapiens	MTC1120	sputum
GCA_040273015.2	PRJNA288601	SAMN41984683	Complete Genome	GENBANK	98.1018	100	0.273973	USA	2024	Homo sapiens	2024CK-00843	skin
GCA_040273095.2	PRJNA288601	SAMN41984684	Complete Genome	GENBANK	97.9582	100	0.273973	USA	2024	Homo sapiens	2024CK-00842	skin
GCA_040273435.2	PRJNA288601	SAMN41984685	Complete Genome	GENBANK	97.9615	100	0.273973	USA	2024	Homo sapiens	2024CK-00841	skin
GCA_040801815.1	PRJNA1034534	SAMN42480256	Complete Genome	GENBANK	97.9892	100	0	China	2021	-	DETAB-P462	Homo sapiens
GCA_040898785.2	PRJNA288601	SAMN42837556	Complete Genome	GENBANK	98.132	99.726	0.273973	USA	2024	Homo sapiens	2024CK-01048	sputum
GCA_040939585.2	PRJNA288601	SAMN42837561	Complete Genome	GENBANK	98.1289	99.9813	0.609299	USA	2024	Homo sapiens	2024CK-01097	blood
GCA_041292005.2	PRJNA288601	SAMN43185119	Complete Genome	GENBANK	97.9723	100	0.136986	USA	2024	Homo sapiens	2024CK-01227	skin
GCA_041292025.2	PRJNA288601	SAMN43185120	Complete Genome	GENBANK	98.0857	99.8828	0.628046	USA	2024	Homo sapiens	2024CK-01226	skin
GCA_041292045.2	PRJNA288601	SAMN43185121	Complete Genome	GENBANK	98.0856	99.8828	0.628046	USA	2024	Homo sapiens	2024CK-01225	skin
GCA_041292065.2	PRJNA288601	SAMN43185122	Complete Genome	GENBANK	98.0865	99.8828	0.628046	USA	2024	Homo sapiens	2024CK-01224	skin
GCA_041760695.2	PRJNA288601	SAMN43497284	Complete Genome	GENBANK	98.0988	100	0	USA	2024	Homo sapiens	2024CK-01357	other
GCA_042209675.2	PRJNA288601	SAMN43585574	Complete Genome	GENBANK	98.1198	99.9813	0.628046	USA	2024	Homo sapiens	2024CK-01386	skin
GCA_042209595.2	PRJNA288601	SAMN43585575	Complete Genome	GENBANK	98.1386	99.9813	0.628046	USA	2024	Homo sapiens	2024CK-01385	other
GCA_042209715.2	PRJNA288601	SAMN43585576	Complete Genome	GENBANK	98.1362	99.9813	0.628046	USA	2024	Homo sapiens	2024CK-01384	skin
GCA_042165515.2	PRJNA288601	SAMN43815358	Complete Genome	GENBANK	98.114	99.9813	0.628046	USA	2024	Homo sapiens	2024CK-01391	skin
GCA_045182155.1	PRJNA288601	SAMN43963448	Complete Genome	GENBANK	97.9844	100	0.328767	USA	2024	Homo sapiens	2024CK-01407	urine
GCA_042445505.2	PRJNA288601	SAMN43963451	Complete Genome	GENBANK	97.9744	100	0.136986	USA	2024	Homo sapiens	2024CK-01444	Wound/Abscess
GCA_042443055.2	PRJNA288601	SAMN43963452	Complete Genome	GENBANK	97.9744	100	0.273973	USA	2024	Homo sapiens	2024CK-01445	Wound/Abscess
GCA_042443115.2	PRJNA288601	SAMN43963453	Complete Genome	GENBANK	98.1548	99.9813	0.628046	USA	2024	Homo sapiens	2024CK-01459	Tissue
GCA_042945475.2	PRJNA288601	SAMN44063870	Complete Genome	GENBANK	98.205	99.5876	0.628046	USA	2024	Homo sapiens	2024CK-01504	Tracheal Aspirate/Wash
GCA_042700245.2	PRJNA288601	SAMN44063871	Complete Genome	GENBANK	98.1546	99.9813	0.628046	USA	2024	Homo sapiens	2024CK-01503	sputum
GCF_000820665.1	PRJNA224116	SAMEA3158456	Chromosome	REFSEQ	98.052	99.5876	0.628046	-	-	-	CS01	-
GCF_000820685.1	PRJNA224116	SAMEA3158506	Chromosome	REFSEQ	98.0419	99.5876	0.628046	-	-	-	CR17	-
GCF_000372585.2	PRJNA224116	SAMN02471432	Chromosome	REFSEQ	98.0367	98.9498	0	Malaysia	2012	Homo sapiens	PR07	blood
GCF_001077565.2	PRJNA224116	SAMN03771550	Chromosome	REFSEQ	97.9941	100	0.410959	India	2014	Homo sapiens	B11911	blood
GCF_001922425.2	PRJNA224116	SAMN06093832	Chromosome	REFSEQ	98.0145	100	0.821918	Mexico	2012	Homo sapiens	11510	Bronchial
GCF_003202135.1	PRJNA224116	SAMN07167814	Chromosome	REFSEQ	98.1258	99.9813	0.609299	China	2009	sputum	ZS3	-
GCF_002948475.1	PRJNA224116	SAMN07977762	Chromosome	REFSEQ	98.1139	99.9813	1.003	USA	2007	Homo sapiens	S1, AB1A2	BAL
GCF_009428985.1	PRJNA224116	SAMN09244198	Chromosome	REFSEQ	97.8992	100	0.273973	India	-	Homo sapiens	5457	-
GCF_006843645.1	PRJNA224116	SAMN09906510	Chromosome	REFSEQ	97.9259	100	0	Argentina	2016	Homo sapiens	UPAB1	urine
GCF_003949295.2	PRJNA224116	SAMN10261590	Chromosome	REFSEQ	98.1216	99.5876	1.3967	USA	2013	Homo sapiens	TG60155	sputum
GCF_004354145.1	PRJNA224116	SAMN11077515	Chromosome	REFSEQ	98.0264	100	0	Canada	2013	Homo sapiens	AB046	Drainage basin water
GCF_004354165.1	PRJNA224116	SAMN11077516	Chromosome	REFSEQ	97.9499	100	0	Canada	2013	Homo sapiens	AB047	Drainage basin water
GCF_004354185.1	PRJNA224116	SAMN11077517	Chromosome	REFSEQ	97.9954	99.9609	1.09589	Canada	2013	Homo sapiens	AB048	Drainage basin water
GCF_004354125.1	PRJNA224116	SAMN11077519	Chromosome	REFSEQ	98.0007	100	0.639269	Canada	2013	Homo sapiens	AB053	Drainage basin water
GCF_004794235.2	PRJNA224116	SAMN11304548	Chromosome	REFSEQ	98.0049	100	1.06849	South Korea	2018	-	ATCC 17978	missing
GCF_004794275.2	PRJNA224116	SAMN11304549	Chromosome	REFSEQ	98.0054	100	0.273973	South Korea	2018	-	ATCC 17978	missing
GCF_030585305.1	PRJNA224116	SAMN12287000	Chromosome	REFSEQ	98.0129	99.9813	0.619939	USA	2018	Homo sapiens	18WIARLN0022	Skin/Wound
GCF_029814355.1	PRJNA224116	SAMN12618962	Chromosome	REFSEQ	98.1216	100	0	Russia	2016	Homo sapiens	GIMC5506:ABT-3Ts52	sputum
GCF_029581555.1	PRJNA224116	SAMN12618963	Chromosome	REFSEQ	98.1186	99.925	0.628046	Russia	2016	Homo sapiens	GIMC5508:ABT-3Ts65	sputum
GCF_016117795.1	PRJNA224116	SAMN13450447	Chromosome	REFSEQ	99.9965	99.6347	1.09589	Not applicable	Unknown	missing	FDAARGOS_917	missing
GCF_018502545.1	PRJNA224116	SAMN14572873	Chromosome	REFSEQ	98.0762	99.7137	0.609299	Turkey	2017	Homo sapiens	A24	missing
GCF_019264845.1	PRJNA224116	SAMN17777228	Chromosome	REFSEQ	97.9609	98.1943	0	Thailand	Not collected	-	Colony258	food
GCF_019264785.1	PRJNA224116	SAMN17777230	Chromosome	REFSEQ	97.9398	98.8792	0	Thailand	Not collected	-	Colony319	food
GCF_019264805.1	PRJNA224116	SAMN17777231	Chromosome	REFSEQ	97.9195	98.6052	0	Thailand	Not collected	-	Colony271	food
GCF_017584105.1	PRJNA224116	SAMN18276099	Chromosome	REFSEQ	98.1448	100	0	Russia	2017	Homo sapiens	GIMC5510:ABT-897-17	blood
GCF_019457735.1	PRJNA224116	SAMN19988021	Chromosome	REFSEQ	98.0355	100	0	France	2012	Homo sapiens	CNRAB1	Unknown
GCF_019316825.1	PRJNA224116	SAMN20011941	Chromosome	REFSEQ	97.9787	100	0.273973	USA	2018	Homo sapiens	Ab17978UN	-
GCF_019356095.1	PRJNA224116	SAMN20295817	Chromosome	REFSEQ	98.1346	99.9813	0.628046	China	2019	Homo sapiens	K7-3RD	blood
GCF_024749785.1	PRJNA224116	SAMN23078443	Chromosome	REFSEQ	98.039	100	0.273973	Germany	not collected	Homo sapiens	DB001	unknown
GCF_024749725.1	PRJNA224116	SAMN23078446	Chromosome	REFSEQ	98.0381	100	0	Germany	not collected	Homo sapiens	DB004	unknown
GCF_024749705.1	PRJNA224116	SAMN23078447	Chromosome	REFSEQ	98.0379	100	0	Germany	not collected	Homo sapiens	DB005	unknown
GCF_024749585.1	PRJNA224116	SAMN23078454	Chromosome	REFSEQ	97.9688	100	0	Germany	not collected	Homo sapiens	OC008	unknown
GCF_024749565.1	PRJNA224116	SAMN23078456	Chromosome	REFSEQ	98.1546	99.9813	0.628046	Germany	not collected	Homo sapiens	OC041	unknown
GCF_023094035.1	PRJNA224116	SAMN25295621	Chromosome	REFSEQ	97.9123	98.8128	3.67787	India	2021	-	Z1	Sewage
GCF_029714025.1	PRJNA224116	SAMN27010211	Chromosome	REFSEQ	98.1256	99.9813	1.62196	Saudi Arabia	2018	Homo sapiens	JAB34	not collected
GCF_029714125.1	PRJNA224116	SAMN27010224	Chromosome	REFSEQ	98.0842	99.9813	1.57293	Saudi Arabia	2018	Homo sapiens	JAB108	not collected
GCF_029714065.1	PRJNA224116	SAMN27010225	Chromosome	REFSEQ	98.1018	99.7844	1.02175	Saudi Arabia	2018	Homo sapiens	JAB116	not collected
GCF_029713985.1	PRJNA224116	SAMN27010257	Chromosome	REFSEQ	98.07	99.9813	0.646794	Saudi Arabia	2019	Homo sapiens	MAB16	not collected
GCF_029713725.1	PRJNA224116	SAMN27010264	Chromosome	REFSEQ	98.0181	100	0.273973	Saudi Arabia	2019	Homo sapiens	MAB25	not collected
GCF_029713825.1	PRJNA224116	SAMN27010274	Chromosome	REFSEQ	98.0742	99.9813	0.628046	Saudi Arabia	2018	Homo sapiens	RAB30	not collected
GCF_029713805.1	PRJNA224116	SAMN27010279	Chromosome	REFSEQ	98.0128	100	0	Saudi Arabia	2019	Homo sapiens	RAB57	not collected
GCF_025732115.1	PRJNA224116	SAMN31029726	Chromosome	REFSEQ	98.1105	98.4627	0.628046	Russia	2019	Homo sapiens	GIMC5509:ABT-52Ts19	upper respiratory tract
GCF_025732095.1	PRJNA224116	SAMN31029727	Chromosome	REFSEQ	98.074	99.9025	0.628046	Russia	2019	Homo sapiens	GIMC5507:ABT-52Ts18	upper respiratory tract
GCF_025677625.1	PRJNA224116	SAMN31037892	Chromosome	REFSEQ	97.8967	100	0	Greece	2017	Homo sapiens	ARC6851	urine
GCF_029814335.1	PRJNA224116	SAMN31178858	Chromosome	REFSEQ	98.0916	99.9813	0.628046	Russia	2019	Homo sapiens	SCCH66:Ab99738	blood
GCF_029814405.1	PRJNA224116	SAMN31178862	Chromosome	REFSEQ	98.1009	99.9813	0.628046	Russia	2021	Homo sapiens	GIMC5511:ABT-AB4	tracheal aspirate
GCF_045289435.1	PRJNA224116	SAMN39308216	Chromosome	REFSEQ	98.1217	99.85	0.628046	South Korea	2020	Homo sapiens	A20AB01	missing
GCF_045689745.1	PRJNA224116	SAMN39325180	Chromosome	REFSEQ	98.0788	99.9813	0.609299	South Korea	2020	Homo sapiens	G20AB05	missing
GCF_045689765.1	PRJNA224116	SAMN39325194	Chromosome	REFSEQ	98.0851	99.9813	0.609299	South Korea	2020	Homo sapiens	G20AB11	missing
GCF_045689785.1	PRJNA224116	SAMN39325195	Chromosome	REFSEQ	97.9553	100	0.410959	South Korea	2020	Homo sapiens	G20AB22	missing
GCF_045289525.1	PRJNA224116	SAMN39325196	Chromosome	REFSEQ	98.1042	99.9813	0.609299	South Korea	2020	Homo sapiens	H20AB06	missing
GCF_045289605.1	PRJNA224116	SAMN39325238	Chromosome	REFSEQ	97.9417	99.9087	0	South Korea	2020	-	C20AB12	human
GCF_045689805.1	PRJNA224116	SAMN39325758	Chromosome	REFSEQ	98.0113	100	1.09589	South Korea	2020	-	D20AB01	human
GCF_045289885.1	PRJNA224116	SAMN39325905	Chromosome	REFSEQ	98.1295	99.9813	0.609299	South Korea	2020	-	D20AB03	human
GCF_045689825.1	PRJNA224116	SAMN39325906	Chromosome	REFSEQ	98.1046	99.9813	0.633905	South Korea	2020	-	E20AB08	human
GCF_045689845.1	PRJNA224116	SAMN39325908	Chromosome	REFSEQ	98.1005	99.9813	0.633905	South Korea	2020	-	E20AB21	human
GCF_045689865.1	PRJNA224116	SAMN39325910	Chromosome	REFSEQ	98.071	99.9813	0.609299	South Korea	2020	-	E20AB39	human
GCF_038098625.1	PRJNA224116	SAMN40261919	Chromosome	REFSEQ	98.1385	99.5876	0.628046	China	2018	-	Ab2712	sputum
GCF_045348215.1	PRJNA224116	SAMN41053466	Chromosome	REFSEQ	98.0789	99.6031	0.609299	China	2023	Homo sapiens	AB48	sputum
GCF_039658505.1	PRJNA224116	SAMN41064438	Chromosome	REFSEQ	98.0745	99.6031	0.609299	China	2023	Homo sapiens	AB48-R	sputum
GCF_046531805.1	PRJNA224116	SAMN41257699	Chromosome	REFSEQ	97.908	99.726	0	Pakistan	2023	Homo sapiens	JRCGR-ACBMN01	Wound exudate
GCF_042150455.1	PRJNA224116	SAMN41934842	Chromosome	REFSEQ	98.143	99.9813	0.628046	France	2018	Homo sapiens	Rp668	Respiratory/BAL
GCF_042152975.1	PRJNA224116	SAMN41934846	Chromosome	REFSEQ	98.1538	99.9813	0.628046	Malaysia	2013	Homo sapiens	Up367	Urinary source
GCF_042144705.1	PRJNA224116	SAMN41934862	Chromosome	REFSEQ	98.1146	99.9813	1.3967	USA	2020	Homo sapiens	Lv643	respiratory
GCF_042145195.1	PRJNA224116	SAMN41934863	Chromosome	REFSEQ	98.1351	98.9041	0	USA	2020	Homo sapiens	Lv646	respiratory
GCF_042140315.1	PRJNA224116	SAMN41934867	Chromosome	REFSEQ	97.9709	99.9813	1.003	Mexico	2018	Homo sapiens	Hv383	Urine/Urinary tract
GCF_041501475.1	PRJNA224116	SAMN43259724	Chromosome	REFSEQ	97.9095	99.863	0.0391389	Brazil	2015	Homo sapiens	G6290164	rectal swab
GCA_000069205.1	PRJNA13001	SAMEA3138277	Chromosome	GENBANK	98.0762	99.0411	0.547945	-	-	-	SDF	-
GCA_000282795.3	PRJNA168112	SAMN02471420	Chromosome	GENBANK	98.1445	99.9813	0.628046	Malaysia	2011	Homo sapiens	AC12	blood
GCA_001628795.1	PRJNA308422	SAMN04448102	Chromosome	GENBANK	98.1099	99.3489	0	Spain	2010	Homo sapiens	Ab421_GEIH-2010	biological sample
GCA_017357845.1	PRJNA600804	SAMN13831468	Chromosome	GENBANK	98.105	99.7344	0.609299	Turkey	2017	Homo sapiens	A73	sputum
GCA_015832155.1	PRJNA649662	SAMN15676490	Chromosome	GENBANK	97.8495	99.6804	2.42009	Spain	2019	Homo sapiens	AbBAS-1	clinical
GCA_019264825.1	PRJNA668870	SAMN17777229	Chromosome	GENBANK	97.9007	98.8792	0	Thailand	Not collected	-	Colony151	other
GCA_033170255.1	PRJNA1030270	SAMN37898701	Chromosome	GENBANK	98.1537	97.1597	0.628046	Italy	2022	Homo sapiens	02_2023_acineto	blood
GCA_045289465.1	PRJNA1062973	SAMN39325179	Chromosome	GENBANK	98.0835	97.8289	0.609299	South Korea	2020	Homo sapiens	F20AB48	missing
GCA_045290085.1	PRJNA1062984	SAMN39325911	Chromosome	GENBANK	98.0594	97.9043	0.660855	South Korea	2020	-	F20AB02	human
GCA_040957075.1	PRJNA854605	SAMN41918904	Chromosome	GENBANK	98.1265	99.6731	0.609299	Thailand	2016/2017	Homo sapiens	MTC0610	sputum
GCA_040957045.1	PRJNA854605	SAMN41918905	Chromosome	GENBANK	98.1232	99.035	0.257505	Thailand	2016/2017	Homo sapiens	MTC0614	Pus
GCA_041002735.1	PRJNA1127342	SAMN42001262	Chromosome	GENBANK	98.1195	99.3734	0.259343	South Korea	2019	Homo sapiens	19-046	blood
GCA_041002685.1	PRJNA1127342	SAMN42001265	Chromosome	GENBANK	98.1149	99.0077	0.609299	South Korea	2019	Homo sapiens	19-113	blood
GCA_041002475.1	PRJNA1127342	SAMN42001268	Chromosome	GENBANK	98.1245	99.1103	0.215598	South Korea	2019	Homo sapiens	19-226	blood
GCA_041001725.1	PRJNA1127342	SAMN42001272	Chromosome	GENBANK	98.0673	97.8005	0.628046	South Korea	2020	Homo sapiens	20-190	blood
GCF_003569425.1	PRJNA224116	SAMD00134835	Scaffold	REFSEQ	98.0093	99.726	0	not applicable	2014	Homo sapiens	OCU_Ac1	-
GCF_003569445.1	PRJNA224116	SAMD00134836	Scaffold	REFSEQ	97.8979	100	0.587084	not applicable	2014	Homo sapiens	OCU_Ac2	-
GCF_003569625.1	PRJNA224116	SAMD00134844	Scaffold	REFSEQ	97.8409	100	0.273973	not applicable	2014	Homo sapiens	OCU_Ac10	-
GCF_003569645.1	PRJNA224116	SAMD00134845	Scaffold	REFSEQ	97.9342	99.726	1.05879	not applicable	2011	Homo sapiens	OCU_Ac11	-
GCF_900169915.1	PRJNA224116	SAMEA103920782	Scaffold	REFSEQ	97.8347	100	0.502283	-	-	-	-	-
GCF_900175195.1	PRJNA224116	SAMEA103955436	Scaffold	REFSEQ	98.0976	99.5876	0.702076	Morocco	2015	Homo sapiens	AC13_M	Anal margin
GCF_900494425.1	PRJNA224116	SAMEA104305173	Scaffold	REFSEQ	98.0843	99.9813	0.628046	Thailand	2016	Homo sapiens	4300STDY7045677	not available
GCF_900494435.1	PRJNA224116	SAMEA104305174	Scaffold	REFSEQ	97.9853	100	0	Thailand	2016	Homo sapiens	4300STDY7045678	not available
GCF_900494415.1	PRJNA224116	SAMEA104305175	Scaffold	REFSEQ	98.0722	99.9813	1.12017	Thailand	2016	Homo sapiens	4300STDY7045679	not available
GCF_900494475.1	PRJNA224116	SAMEA104305176	Scaffold	REFSEQ	97.9783	100	0	Thailand	2016	Homo sapiens	4300STDY7045680	not available
GCF_900494455.1	PRJNA224116	SAMEA104305178	Scaffold	REFSEQ	98.1248	99.9813	0.628046	Thailand	2016	Homo sapiens	4300STDY7045682	not available
GCF_900494465.1	PRJNA224116	SAMEA104305179	Scaffold	REFSEQ	98.1259	99.9813	0.628046	Thailand	2016	Homo sapiens	4300STDY7045683	not available
GCF_900494395.1	PRJNA224116	SAMEA104305180	Scaffold	REFSEQ	98.1127	99.9813	0.628046	Thailand	2016	Homo sapiens	4300STDY7045684	not available
GCF_900494405.1	PRJNA224116	SAMEA104305181	Scaffold	REFSEQ	98.1373	99.9813	0.628046	Thailand	2016	Homo sapiens	4300STDY7045685	not available
GCF_900494705.1	PRJNA224116	SAMEA104305182	Scaffold	REFSEQ	97.9815	100	0	Thailand	2016	Homo sapiens	4300STDY7045686	not available
GCF_900494695.1	PRJNA224116	SAMEA104305183	Scaffold	REFSEQ	98.1082	99.9813	0.628046	Thailand	2016	Homo sapiens	4300STDY7045687	not available
GCF_900494515.1	PRJNA224116	SAMEA104305184	Scaffold	REFSEQ	98.114	99.9813	0.628046	Thailand	2016	Homo sapiens	4300STDY7045688	not available
GCF_900494765.1	PRJNA224116	SAMEA104305186	Scaffold	REFSEQ	98.1119	99.9813	0.628046	Thailand	2016	Homo sapiens	4300STDY7045690	not available
GCF_900494665.1	PRJNA224116	SAMEA104305187	Scaffold	REFSEQ	98.121	99.9813	0.652653	Thailand	2016	Homo sapiens	4300STDY7045691	not available
GCF_900494645.1	PRJNA224116	SAMEA104305188	Scaffold	REFSEQ	98.017	100	0	Thailand	2016	Homo sapiens	4300STDY7045692	not available
GCF_900494495.1	PRJNA224116	SAMEA104305189	Scaffold	REFSEQ	98.1142	99.9813	0.628046	Thailand	2016	Homo sapiens	4300STDY7045693	not available
GCF_900494555.1	PRJNA224116	SAMEA104305190	Scaffold	REFSEQ	98.1252	99.9813	0.628046	Thailand	2016	Homo sapiens	4300STDY7045694	not available
GCF_900494795.1	PRJNA224116	SAMEA104305191	Scaffold	REFSEQ	97.8401	100	0.136986	Thailand	2016	Homo sapiens	4300STDY7045695	not available
GCF_900494905.1	PRJNA224116	SAMEA104305194	Scaffold	REFSEQ	98.1188	99.9813	0.628046	Thailand	2016	Homo sapiens	4300STDY7045698	not available
GCF_900494805.1	PRJNA224116	SAMEA104305195	Scaffold	REFSEQ	98.1163	99.9813	0.628046	Thailand	2016	Homo sapiens	4300STDY7045699	not available
GCF_900494975.1	PRJNA224116	SAMEA104305196	Scaffold	REFSEQ	97.8818	100	0	Thailand	2016	Homo sapiens	4300STDY7045700	not available
GCF_900494825.1	PRJNA224116	SAMEA104305197	Scaffold	REFSEQ	98.1271	99.9813	0.628046	Thailand	2016	Homo sapiens	4300STDY7045701	not available
GCF_900494845.1	PRJNA224116	SAMEA104305199	Scaffold	REFSEQ	98.1122	99.9813	0.628046	Thailand	2016	Homo sapiens	4300STDY7045703	not available
GCF_900494925.1	PRJNA224116	SAMEA104305201	Scaffold	REFSEQ	98.112	99.9813	0.628046	Thailand	2016	Homo sapiens	4300STDY7045705	not available
GCF_900494935.1	PRJNA224116	SAMEA104305202	Scaffold	REFSEQ	97.9795	100	0	Thailand	2016	Homo sapiens	4300STDY7045706	not available
GCF_900494995.1	PRJNA224116	SAMEA104305203	Scaffold	REFSEQ	98.0819	99.9813	0.628046	Thailand	2016	Homo sapiens	4300STDY7045707	not available
GCF_900494955.1	PRJNA224116	SAMEA104305204	Scaffold	REFSEQ	97.9985	100	1.23288	Thailand	2016	Homo sapiens	4300STDY7045708	not available
GCF_900494985.1	PRJNA224116	SAMEA104305205	Scaffold	REFSEQ	98.0781	99.9813	0.628046	Thailand	2016	Homo sapiens	4300STDY7045709	not available
GCF_900494915.1	PRJNA224116	SAMEA104305206	Scaffold	REFSEQ	98.077	99.9813	0.628046	Thailand	2016	Homo sapiens	4300STDY7045710	not available
GCF_900494965.1	PRJNA224116	SAMEA104305207	Scaffold	REFSEQ	98.1146	99.9813	0.628046	Thailand	2016	Homo sapiens	4300STDY7045711	not available
GCF_900494945.1	PRJNA224116	SAMEA104305208	Scaffold	REFSEQ	98.114	99.9625	1.30737	Thailand	2016	Homo sapiens	4300STDY7045712	not available
GCF_900494895.1	PRJNA224116	SAMEA104305209	Scaffold	REFSEQ	98.1213	99.9813	0.628046	Thailand	2016	Homo sapiens	4300STDY7045713	not available
GCF_900494875.1	PRJNA224116	SAMEA104305210	Scaffold	REFSEQ	98.0727	99.9087	0	Thailand	2016	Homo sapiens	4300STDY7045714	not available
GCF_900494835.1	PRJNA224116	SAMEA104305211	Scaffold	REFSEQ	98.0735	99.9813	0.628046	Thailand	2016	Homo sapiens	4300STDY7045715	not available
GCF_900494865.1	PRJNA224116	SAMEA104305212	Scaffold	REFSEQ	97.9957	100	0	Thailand	2016	Homo sapiens	4300STDY7045716	not available
GCF_900495035.1	PRJNA224116	SAMEA104305216	Scaffold	REFSEQ	98.1297	99.9813	0.628046	Thailand	2016	Homo sapiens	4300STDY7045720	not available
GCF_900495055.1	PRJNA224116	SAMEA104305217	Scaffold	REFSEQ	98.1204	99.9813	0.628046	Thailand	2016	Homo sapiens	4300STDY7045721	not available
GCF_900495075.1	PRJNA224116	SAMEA104305218	Scaffold	REFSEQ	98.1278	99.9813	0.628046	Thailand	2016	Homo sapiens	4300STDY7045722	not available
GCF_900495025.1	PRJNA224116	SAMEA104305219	Scaffold	REFSEQ	97.9672	100	0	Thailand	2016	Homo sapiens	4300STDY7045723	not available
GCF_900495045.1	PRJNA224116	SAMEA104305220	Scaffold	REFSEQ	97.8473	100	0	Thailand	2016	Homo sapiens	4300STDY7045724	not available
GCF_900495065.1	PRJNA224116	SAMEA104305221	Scaffold	REFSEQ	98.1111	99.9813	0.628046	Thailand	2016	Homo sapiens	4300STDY7045725	not available
GCF_900495125.1	PRJNA224116	SAMEA104305222	Scaffold	REFSEQ	98.1177	99.9813	0.628046	Thailand	2016	Homo sapiens	4300STDY7045726	not available
GCF_900495145.1	PRJNA224116	SAMEA104305223	Scaffold	REFSEQ	98.1194	99.9813	0.652653	Thailand	2016	Homo sapiens	4300STDY7045727	not available
GCF_900495255.1	PRJNA224116	SAMEA104305224	Scaffold	REFSEQ	98.114	99.9813	0.628046	Thailand	2016	Homo sapiens	4300STDY7045728	not available
GCF_900495115.1	PRJNA224116	SAMEA104305225	Scaffold	REFSEQ	98.1222	99.9813	0.770817	Thailand	2016	Homo sapiens	4300STDY7045729	not available
GCF_900495205.1	PRJNA224116	SAMEA104305226	Scaffold	REFSEQ	99.8838	100	0	Thailand	2016	Homo sapiens	4300STDY7045730	not available
GCF_900495155.1	PRJNA224116	SAMEA104305227	Scaffold	REFSEQ	98.1263	99.9025	0.628046	Thailand	2016	Homo sapiens	4300STDY7045731	not available
GCF_900495185.1	PRJNA224116	SAMEA104305228	Scaffold	REFSEQ	98.118	99.9813	0.628046	Thailand	2016	Homo sapiens	4300STDY7045732	not available
GCF_900495175.1	PRJNA224116	SAMEA104305231	Scaffold	REFSEQ	98.1347	99.9813	0.628046	Thailand	2016	Homo sapiens	4300STDY7045735	not available
GCF_900495215.1	PRJNA224116	SAMEA104305232	Scaffold	REFSEQ	98.1156	99.9813	1.31137	Thailand	2016	Homo sapiens	4300STDY7045736	not available
GCF_900495095.1	PRJNA224116	SAMEA104305233	Scaffold	REFSEQ	98.1131	99.9813	0.628046	Thailand	2016	Homo sapiens	4300STDY7045737	not available
GCF_900495085.1	PRJNA224116	SAMEA104305234	Scaffold	REFSEQ	98.1142	99.9813	0.628046	Thailand	2016	Homo sapiens	4300STDY7045738	not available
GCF_900495165.1	PRJNA224116	SAMEA104305236	Scaffold	REFSEQ	98.1118	99.9813	0.628046	Thailand	2016	Homo sapiens	4300STDY7045740	not available
GCF_900495245.1	PRJNA224116	SAMEA104305237	Scaffold	REFSEQ	98.1151	99.9813	2.53222	Thailand	2016	Homo sapiens	4300STDY7045741	not available
GCF_900495225.1	PRJNA224116	SAMEA104305238	Scaffold	REFSEQ	98.0913	99.9813	0.628046	Thailand	2016	Homo sapiens	4300STDY7045742	not available
GCF_900495235.1	PRJNA224116	SAMEA104305239	Scaffold	REFSEQ	97.9941	99.726	0	Thailand	2016	Homo sapiens	4300STDY7045743	not available
GCF_900495315.1	PRJNA224116	SAMEA104305240	Scaffold	REFSEQ	97.9597	100	0	Thailand	2016	Homo sapiens	4300STDY7045744	not available
GCF_900495295.1	PRJNA224116	SAMEA104305241	Scaffold	REFSEQ	97.9496	100	0.273973	Thailand	2016	Homo sapiens	4300STDY7045745	not available
GCF_900495285.1	PRJNA224116	SAMEA104305243	Scaffold	REFSEQ	98.1112	99.9813	0.628046	Thailand	2016	Homo sapiens	4300STDY7045747	not available
GCF_900495325.1	PRJNA224116	SAMEA104305244	Scaffold	REFSEQ	98.1064	99.9813	0.628046	Thailand	2016	Homo sapiens	4300STDY7045748	not available
GCF_900495275.1	PRJNA224116	SAMEA104305245	Scaffold	REFSEQ	98.1375	99.9813	0.628046	Thailand	2016	Homo sapiens	4300STDY7045749	not available
GCF_900495445.1	PRJNA224116	SAMEA104305249	Scaffold	REFSEQ	98.0627	99.726	0.0998858	Thailand	2016	Homo sapiens	4300STDY7045753	not available
GCF_900495505.1	PRJNA224116	SAMEA104305250	Scaffold	REFSEQ	98.1142	99.9813	0.652653	Thailand	2016	Homo sapiens	4300STDY7045754	not available
GCF_900495425.1	PRJNA224116	SAMEA104305251	Scaffold	REFSEQ	98.0807	99.9813	0.74582	Thailand	2016	Homo sapiens	4300STDY7045755	not available
GCF_900495375.1	PRJNA224116	SAMEA104305252	Scaffold	REFSEQ	98.1153	99.9813	1.31419	Thailand	2016	Homo sapiens	4300STDY7045756	not available
GCF_900495515.1	PRJNA224116	SAMEA104305253	Scaffold	REFSEQ	98.0943	99.9813	0.774513	Thailand	2016	Homo sapiens	4300STDY7045757	not available
GCF_900495385.1	PRJNA224116	SAMEA104305255	Scaffold	REFSEQ	97.8782	100	0.0913242	Thailand	2016	Homo sapiens	4300STDY7045759	not available
GCF_900495525.1	PRJNA224116	SAMEA104305256	Scaffold	REFSEQ	98.1248	99.9813	1.02978	Thailand	2016	Homo sapiens	4300STDY7045760	not available
GCF_900495455.1	PRJNA224116	SAMEA104305257	Scaffold	REFSEQ	98.1282	99.9813	0.684289	Thailand	2016	Homo sapiens	4300STDY7045761	not available
GCF_900495495.1	PRJNA224116	SAMEA104305259	Scaffold	REFSEQ	97.9792	100	0	Thailand	2016	Homo sapiens	4300STDY7045763	not available
GCF_900495335.1	PRJNA224116	SAMEA104305260	Scaffold	REFSEQ	98.0854	99.9813	0.77974	Thailand	2016	Homo sapiens	4300STDY7045764	not available
GCF_900495345.1	PRJNA224116	SAMEA104305262	Scaffold	REFSEQ	97.8284	100	0.342466	Thailand	2016	Homo sapiens	4300STDY7045766	not available
GCF_900495465.1	PRJNA224116	SAMEA104305263	Scaffold	REFSEQ	98.0941	99.9813	1.02978	Thailand	2016	Homo sapiens	4300STDY7045767	not available
GCF_900495485.1	PRJNA224116	SAMEA104305264	Scaffold	REFSEQ	98.1065	99.9813	0.772856	Thailand	2016	Homo sapiens	4300STDY7045768	not available
GCF_900495395.1	PRJNA224116	SAMEA104305265	Scaffold	REFSEQ	98.1227	99.9813	0.628046	Thailand	2016	Homo sapiens	4300STDY7045769	not available
GCF_900495355.1	PRJNA224116	SAMEA104305267	Scaffold	REFSEQ	97.9835	100	0.328767	Thailand	2016	Homo sapiens	4300STDY7045771	not available
GCF_900495565.1	PRJNA224116	SAMEA104305269	Scaffold	REFSEQ	97.9188	100	0.273973	Thailand	2016	Homo sapiens	4300STDY7045774	not available
GCF_900495575.1	PRJNA224116	SAMEA104305270	Scaffold	REFSEQ	98.0666	100	0.890411	Thailand	2016	Homo sapiens	4300STDY7045775	not available
GCF_900495555.1	PRJNA224116	SAMEA104305272	Scaffold	REFSEQ	98.1187	99.85	0.628046	Thailand	2016	Homo sapiens	4300STDY7045777	not available
GCF_900495585.1	PRJNA224116	SAMEA104305273	Scaffold	REFSEQ	98.1373	99.9813	0.652653	Thailand	2016	Homo sapiens	4300STDY7045778	not available
GCF_900495635.1	PRJNA224116	SAMEA104305275	Scaffold	REFSEQ	97.9732	100	0.410959	Thailand	2016	Homo sapiens	4300STDY7045780	not available
GCF_900495655.1	PRJNA224116	SAMEA104305276	Scaffold	REFSEQ	98.1219	99.9813	0.684289	Thailand	2016	Homo sapiens	4300STDY7045781	not available
GCF_900495695.1	PRJNA224116	SAMEA104305277	Scaffold	REFSEQ	98.1134	99.9813	0.628046	Thailand	2016	Homo sapiens	4300STDY7045782	not available
GCF_900495725.1	PRJNA224116	SAMEA104305278	Scaffold	REFSEQ	98.1252	99.9813	0.628046	Thailand	2016	Homo sapiens	4300STDY7045783	not available
GCF_900495755.1	PRJNA224116	SAMEA104305279	Scaffold	REFSEQ	98.1265	99.9813	0.628046	Thailand	2016	Homo sapiens	4300STDY7045784	not available
GCF_900495715.1	PRJNA224116	SAMEA104305280	Scaffold	REFSEQ	98.1124	99.9813	0.860688	Thailand	2016	Homo sapiens	4300STDY7045785	not available
GCF_900495735.1	PRJNA224116	SAMEA104305281	Scaffold	REFSEQ	97.8365	100	0.273973	Thailand	2016	Homo sapiens	4300STDY7045786	not available
GCF_900495685.1	PRJNA224116	SAMEA104305282	Scaffold	REFSEQ	98.1313	99.9813	0.628046	Thailand	2016	Homo sapiens	4300STDY7045787	not available
GCF_900495705.1	PRJNA224116	SAMEA104305285	Scaffold	REFSEQ	98.1164	99.1939	0.628046	Thailand	2016	Homo sapiens	4300STDY7045790	not available
GCF_900495785.1	PRJNA224116	SAMEA104305286	Scaffold	REFSEQ	98.1262	99.9813	0.628046	Thailand	2016	Homo sapiens	4300STDY7045791	not available
GCF_900495775.1	PRJNA224116	SAMEA104305287	Scaffold	REFSEQ	98.1245	99.9813	0.628046	Thailand	2016	Homo sapiens	4300STDY7045792	not available
GCF_900495665.1	PRJNA224116	SAMEA104305288	Scaffold	REFSEQ	98.1298	99.9813	0.628046	Thailand	2016	Homo sapiens	4300STDY7045793	not available
GCF_900495615.1	PRJNA224116	SAMEA104305289	Scaffold	REFSEQ	98.1269	99.9813	0.628046	Thailand	2016	Homo sapiens	4300STDY7045794	not available
GCF_900495645.1	PRJNA224116	SAMEA104305290	Scaffold	REFSEQ	97.988	100	0.328767	Thailand	2016	Homo sapiens	4300STDY7045795	not available
GCF_900495795.1	PRJNA224116	SAMEA104305293	Scaffold	REFSEQ	97.9751	100	0	Thailand	2016	Homo sapiens	4300STDY7045798	not available
GCF_900495815.1	PRJNA224116	SAMEA104305294	Scaffold	REFSEQ	97.9761	100	0	Thailand	2016	Homo sapiens	4300STDY7045799	not available
GCF_900495845.1	PRJNA224116	SAMEA104305295	Scaffold	REFSEQ	98.0988	99.9813	0.628046	Thailand	2016	Homo sapiens	4300STDY7045800	not available
GCF_900495805.1	PRJNA224116	SAMEA104305296	Scaffold	REFSEQ	98.1256	99.9813	0.628046	Thailand	2016	Homo sapiens	4300STDY7045801	not available
GCF_900495835.1	PRJNA224116	SAMEA104305297	Scaffold	REFSEQ	97.8361	100	0.547945	Thailand	2016	Homo sapiens	4300STDY7045802	not available
GCF_900495825.1	PRJNA224116	SAMEA104305298	Scaffold	REFSEQ	98.1235	99.9813	0.628046	Thailand	2016	Homo sapiens	4300STDY7045803	not available
GCF_900496005.1	PRJNA224116	SAMEA104305300	Scaffold	REFSEQ	98.1273	99.9813	0.628046	Thailand	2016	Homo sapiens	4300STDY7045805	not available
GCF_900495985.1	PRJNA224116	SAMEA104305301	Scaffold	REFSEQ	97.9565	100	0.0342466	Thailand	2016	Homo sapiens	4300STDY7045806	not available
GCF_900495865.1	PRJNA224116	SAMEA104305303	Scaffold	REFSEQ	97.9594	100	0	Thailand	2016	Homo sapiens	4300STDY7045808	not available
GCF_900495915.1	PRJNA224116	SAMEA104305304	Scaffold	REFSEQ	98.1177	99.9813	0.726472	Thailand	2016	Homo sapiens	4300STDY7045809	not available
GCF_900495905.1	PRJNA224116	SAMEA104305305	Scaffold	REFSEQ	98.1171	99.9813	0.628046	Thailand	2016	Homo sapiens	4300STDY7045810	not available
GCF_900496015.1	PRJNA224116	SAMEA104305306	Scaffold	REFSEQ	97.975	100	0.0391389	Thailand	2016	Homo sapiens	4300STDY7045811	not available
GCF_900495875.1	PRJNA224116	SAMEA104305307	Scaffold	REFSEQ	98.1333	99.9813	0.737071	Thailand	2016	Homo sapiens	4300STDY7045812	not available
GCF_900495885.1	PRJNA224116	SAMEA104305310	Scaffold	REFSEQ	98.1316	99.9813	0.628046	Thailand	2016	Homo sapiens	4300STDY7045815	not available
GCF_900495855.1	PRJNA224116	SAMEA104305311	Scaffold	REFSEQ	98.1253	99.9813	0.75928	Thailand	2016	Homo sapiens	4300STDY7045816	not available
GCF_900495895.1	PRJNA224116	SAMEA104305312	Scaffold	REFSEQ	98.1276	99.9813	0.628046	Thailand	2016	Homo sapiens	4300STDY7045817	not available
GCF_900495975.1	PRJNA224116	SAMEA104305313	Scaffold	REFSEQ	97.9011	100	0.136986	Thailand	2016	Homo sapiens	4300STDY7045818	not available
GCF_900495925.1	PRJNA224116	SAMEA104305314	Scaffold	REFSEQ	98.1325	99.9813	0.628046	Thailand	2016	Homo sapiens	4300STDY7045819	not available
GCF_900496055.1	PRJNA224116	SAMEA104305317	Scaffold	REFSEQ	98.1312	99.9813	1.21999	Thailand	2016	Homo sapiens	4300STDY7045822	not available
GCF_900496045.1	PRJNA224116	SAMEA104305318	Scaffold	REFSEQ	98.0061	100	0.684932	Thailand	2016	Homo sapiens	4300STDY7045823	not available
GCF_900496095.1	PRJNA224116	SAMEA104305319	Scaffold	REFSEQ	97.8378	100	0.273973	Thailand	2016	Homo sapiens	4300STDY7045824	not available
GCF_900496025.1	PRJNA224116	SAMEA104305322	Scaffold	REFSEQ	98.1165	99.9813	0.628046	Thailand	2016	Homo sapiens	4300STDY7045827	not available
GCF_900496085.1	PRJNA224116	SAMEA104305323	Scaffold	REFSEQ	98.129	99.9813	0.628046	Thailand	2016	Homo sapiens	4300STDY7045828	not available
GCF_900496125.1	PRJNA224116	SAMEA104305324	Scaffold	REFSEQ	97.9725	100	0	Thailand	2016	Homo sapiens	4300STDY7045829	not available
GCF_900496265.1	PRJNA224116	SAMEA104305327	Scaffold	REFSEQ	98.1303	99.9813	0.628046	Thailand	2016	Homo sapiens	4300STDY7045832	not available
GCF_900496315.1	PRJNA224116	SAMEA104305328	Scaffold	REFSEQ	98.1284	99.9813	0.677259	Thailand	2016	Homo sapiens	4300STDY7045833	not available
GCF_900496135.1	PRJNA224116	SAMEA104305329	Scaffold	REFSEQ	97.935	100	0	Thailand	2016	Homo sapiens	4300STDY7045834	not available
GCF_900496285.1	PRJNA224116	SAMEA104305330	Scaffold	REFSEQ	98.1234	99.9813	0.628046	Thailand	2016	Homo sapiens	4300STDY7045835	not available
GCF_900496255.1	PRJNA224116	SAMEA104305332	Scaffold	REFSEQ	98.1281	99.9813	0.628046	Thailand	2016	Homo sapiens	4300STDY7045837	not available
GCF_900496345.1	PRJNA224116	SAMEA104305334	Scaffold	REFSEQ	98.1304	99.9813	0.628046	Thailand	2016	Homo sapiens	4300STDY7045839	not available
GCF_900496325.1	PRJNA224116	SAMEA104305335	Scaffold	REFSEQ	97.8355	100	0.273973	Thailand	2016	Homo sapiens	4300STDY7045840	not available
GCF_900496225.1	PRJNA224116	SAMEA104305336	Scaffold	REFSEQ	98.1286	99.9813	0.628046	Thailand	2016	Homo sapiens	4300STDY7045841	not available
GCF_900496305.1	PRJNA224116	SAMEA104305338	Scaffold	REFSEQ	98.136	99.9813	0.628046	Thailand	2016	Homo sapiens	4300STDY7045843	not available
GCF_900496295.1	PRJNA224116	SAMEA104305340	Scaffold	REFSEQ	97.8612	100	0.136986	Thailand	2016	Homo sapiens	4300STDY7045845	not available
GCF_900496195.1	PRJNA224116	SAMEA104305341	Scaffold	REFSEQ	98.0553	100	2.75799	Thailand	2016	Homo sapiens	4300STDY7045846	not available
GCF_900496165.1	PRJNA224116	SAMEA104305342	Scaffold	REFSEQ	97.9621	100	0	Thailand	2016	Homo sapiens	4300STDY7045847	not available
GCF_900496145.1	PRJNA224116	SAMEA104305343	Scaffold	REFSEQ	97.9628	100	0	Thailand	2016	Homo sapiens	4300STDY7045848	not available
GCF_900496185.1	PRJNA224116	SAMEA104305344	Scaffold	REFSEQ	97.8761	100	0	Thailand	2016	Homo sapiens	4300STDY7045849	not available
GCF_900496155.1	PRJNA224116	SAMEA104305345	Scaffold	REFSEQ	98.0708	99.9087	0	Thailand	2016	Homo sapiens	4300STDY7045850	not available
GCF_900496175.1	PRJNA224116	SAMEA104305346	Scaffold	REFSEQ	98.0604	99.9087	1.11546	Thailand	2016	Homo sapiens	4300STDY7045851	not available
GCF_900496245.1	PRJNA224116	SAMEA104305347	Scaffold	REFSEQ	97.8982	100	0.136986	Thailand	2016	Homo sapiens	4300STDY7045852	not available
GCF_900496335.1	PRJNA224116	SAMEA104305348	Scaffold	REFSEQ	97.9513	100	0	Thailand	2016	Homo sapiens	4300STDY7045853	not available
GCF_900496385.1	PRJNA224116	SAMEA104305349	Scaffold	REFSEQ	98.0675	99.9813	0.628046	Thailand	2016	Homo sapiens	4300STDY7045854	not available
GCF_900496375.1	PRJNA224116	SAMEA104305350	Scaffold	REFSEQ	98.1261	99.9813	0.628046	Thailand	2016	Homo sapiens	4300STDY7045855	not available
GCF_900496395.1	PRJNA224116	SAMEA104305351	Scaffold	REFSEQ	97.8792	100	0	Thailand	2016	Homo sapiens	4300STDY7045856	not available
GCF_900496365.1	PRJNA224116	SAMEA104305352	Scaffold	REFSEQ	98.0716	99.9087	0	Thailand	2016	Homo sapiens	4300STDY7045857	not available
GCF_900496355.1	PRJNA224116	SAMEA104305353	Scaffold	REFSEQ	98.1225	99.9813	0.677259	Thailand	2016	Homo sapiens	4300STDY7045858	not available
GCF_900496405.1	PRJNA224116	SAMEA104305354	Scaffold	REFSEQ	97.9571	100	0	Thailand	2016	Homo sapiens	4300STDY7045859	not available
GCF_900496455.1	PRJNA224116	SAMEA104305356	Scaffold	REFSEQ	98.122	100	0	Thailand	2016	Homo sapiens	4300STDY7045861	not available
GCF_900496445.1	PRJNA224116	SAMEA104305357	Scaffold	REFSEQ	98.0917	99.9813	0.628046	Thailand	2016	Homo sapiens	4300STDY7045862	not available
GCF_900496425.1	PRJNA224116	SAMEA104305358	Scaffold	REFSEQ	97.9214	100	0.136986	Thailand	2016	Homo sapiens	4300STDY7045863	not available
GCF_900496435.1	PRJNA224116	SAMEA104305359	Scaffold	REFSEQ	97.9434	100	0	Thailand	2016	Homo sapiens	4300STDY7045864	not available
GCF_900496495.1	PRJNA224116	SAMEA104305361	Scaffold	REFSEQ	97.9605	100	0.0456621	Thailand	2016	Homo sapiens	4300STDY7045866	not available
GCF_900496665.1	PRJNA224116	SAMEA104305362	Scaffold	REFSEQ	98.0749	100	0.273973	Thailand	2016	Homo sapiens	4300STDY7045867	not available
GCF_900496565.1	PRJNA224116	SAMEA104305363	Scaffold	REFSEQ	98.1078	99.9813	0.663837	Thailand	2016	Homo sapiens	4300STDY7045869	not available
GCF_900496505.1	PRJNA224116	SAMEA104305364	Scaffold	REFSEQ	97.9648	100	0	Thailand	2016	Homo sapiens	4300STDY7045870	not available
GCF_900496765.1	PRJNA224116	SAMEA104305367	Scaffold	REFSEQ	97.7697	100	0	Thailand	2016	Homo sapiens	4300STDY7045891	not available
GCF_900496735.1	PRJNA224116	SAMEA104305368	Scaffold	REFSEQ	97.7725	100	0	Thailand	2016	Homo sapiens	4300STDY7045892	not available
GCF_900496745.1	PRJNA224116	SAMEA104305369	Scaffold	REFSEQ	97.8796	100	0	Thailand	2016	Homo sapiens	4300STDY7045893	not available
GCF_900496695.1	PRJNA224116	SAMEA104305370	Scaffold	REFSEQ	98.1266	99.5876	0.688039	Thailand	2016	Homo sapiens	4300STDY7045894	not available
GCF_900496625.1	PRJNA224116	SAMEA104305371	Scaffold	REFSEQ	98.0767	100	0.15411	Thailand	2016	Homo sapiens	4300STDY7045871	not available
GCF_900496525.1	PRJNA224116	SAMEA104305372	Scaffold	REFSEQ	97.8898	100	0.136986	Thailand	2016	Homo sapiens	4300STDY7045872	not available
GCF_900496595.1	PRJNA224116	SAMEA104305375	Scaffold	REFSEQ	98.0733	100	0.273973	Thailand	2016	Homo sapiens	4300STDY7045875	not available
GCF_900496645.1	PRJNA224116	SAMEA104305376	Scaffold	REFSEQ	98.0768	100	0	Thailand	2016	Homo sapiens	4300STDY7045876	not available
GCF_900496635.1	PRJNA224116	SAMEA104305378	Scaffold	REFSEQ	98.129	99.9813	0.628046	Thailand	2016	Homo sapiens	4300STDY7045878	not available
GCF_900496535.1	PRJNA224116	SAMEA104305379	Scaffold	REFSEQ	98.0777	99.726	0	Thailand	2016	Homo sapiens	4300STDY7045879	not available
GCF_900496605.1	PRJNA224116	SAMEA104305380	Scaffold	REFSEQ	98.0752	99.9087	0.273973	Thailand	2016	Homo sapiens	4300STDY7045880	not available
GCF_900496475.1	PRJNA224116	SAMEA104305381	Scaffold	REFSEQ	98.0726	99.9087	0	Thailand	2016	Homo sapiens	4300STDY7045882	not available
GCF_900496655.1	PRJNA224116	SAMEA104305382	Scaffold	REFSEQ	98.1356	99.9813	0.628046	Thailand	2016	Homo sapiens	4300STDY7045883	not available
GCF_900496585.1	PRJNA224116	SAMEA104305383	Scaffold	REFSEQ	97.7677	100	0	Thailand	2016	Homo sapiens	4300STDY7045884	not available
GCF_900496555.1	PRJNA224116	SAMEA104305384	Scaffold	REFSEQ	97.9431	100	0	Thailand	2016	Homo sapiens	4300STDY7045885	not available
GCF_900496485.1	PRJNA224116	SAMEA104305385	Scaffold	REFSEQ	97.8948	100	0	Thailand	2016	Homo sapiens	4300STDY7045886	not available
GCF_900496755.1	PRJNA224116	SAMEA104305388	Scaffold	REFSEQ	98.1316	99.5876	0.609299	Thailand	2016	Homo sapiens	4300STDY7045895	not available
GCF_900496705.1	PRJNA224116	SAMEA104305389	Scaffold	REFSEQ	98.0622	100	0	Thailand	2016	Homo sapiens	4300STDY7045896	not available
GCF_900496725.1	PRJNA224116	SAMEA104305390	Scaffold	REFSEQ	97.7647	100	0	Thailand	2016	Homo sapiens	4300STDY7045897	not available
GCF_900496775.1	PRJNA224116	SAMEA104305391	Scaffold	REFSEQ	98.1206	99.5876	0.609299	Thailand	2016	Homo sapiens	4300STDY7045898	not available
GCF_900496855.1	PRJNA224116	SAMEA104305392	Scaffold	REFSEQ	98.1353	99.9813	0.628046	Thailand	2016	Homo sapiens	4300STDY7045899	not available
GCF_900496785.1	PRJNA224116	SAMEA104305393	Scaffold	REFSEQ	98.1365	99.9813	0.628046	Thailand	2016	Homo sapiens	4300STDY7045900	not available
GCF_900496795.1	PRJNA224116	SAMEA104305394	Scaffold	REFSEQ	98.133	99.9813	0.628046	Thailand	2016	Homo sapiens	4300STDY7045901	not available
GCF_900496875.1	PRJNA224116	SAMEA104305395	Scaffold	REFSEQ	98.1346	99.9813	0.628046	Thailand	2016	Homo sapiens	4300STDY7045902	not available
GCF_900496915.1	PRJNA224116	SAMEA104305396	Scaffold	REFSEQ	98.1372	99.9813	0.677259	Thailand	2016	Homo sapiens	4300STDY7045903	not available
GCF_900496865.1	PRJNA224116	SAMEA104305397	Scaffold	REFSEQ	98.0594	100	0.0152207	Thailand	2016	Homo sapiens	4300STDY7045904	not available
GCF_900496835.1	PRJNA224116	SAMEA104305398	Scaffold	REFSEQ	98.135	99.9813	0.628046	Thailand	2016	Homo sapiens	4300STDY7045905	not available
GCF_900496845.1	PRJNA224116	SAMEA104305399	Scaffold	REFSEQ	98.0989	99.5876	0.609299	Thailand	2016	Homo sapiens	4300STDY7045906	not available
GCF_900496935.1	PRJNA224116	SAMEA104305400	Scaffold	REFSEQ	98.0389	100	0.273973	Thailand	2016	Homo sapiens	4300STDY7045907	not available
GCF_900496905.1	PRJNA224116	SAMEA104305401	Scaffold	REFSEQ	98.127	99.9813	0.628046	Thailand	2016	Homo sapiens	4300STDY7045908	not available
GCF_900496945.1	PRJNA224116	SAMEA104305402	Scaffold	REFSEQ	98.0424	100	0	Thailand	2016	Homo sapiens	4300STDY7045909	not available
GCF_900496955.1	PRJNA224116	SAMEA104305403	Scaffold	REFSEQ	98.1124	99.5876	0.609299	Thailand	2016	Homo sapiens	4300STDY7045910	not available
GCF_918849845.1	PRJNA224116	SAMEA10885805	Scaffold	REFSEQ	98.0811	99.5876	0.628046	Romania	not provided	Homo sapiens	-	bile
GCF_918847295.1	PRJNA224116	SAMEA10885806	Scaffold	REFSEQ	98.0911	99.9813	0.609299	Romania	not provided	Homo sapiens	-	blood
GCF_918811535.1	PRJNA224116	SAMEA10885807	Scaffold	REFSEQ	98.0773	99.9813	0.628046	Romania	not provided	Homo sapiens	-	blood
GCF_918811475.1	PRJNA224116	SAMEA10885808	Scaffold	REFSEQ	98.0655	100	0	Romania	not provided	Homo sapiens	-	blood
GCF_918851285.1	PRJNA224116	SAMEA10885809	Scaffold	REFSEQ	98.0635	100	0	Romania	not provided	Homo sapiens	-	ascitis fluid
GCF_918809975.1	PRJNA224116	SAMEA10885810	Scaffold	REFSEQ	98.0772	99.2923	0.628046	Romania	not provided	Homo sapiens	-	pus
GCF_918809995.1	PRJNA224116	SAMEA10885811	Scaffold	REFSEQ	98.0761	99.5876	0.628046	Romania	not provided	Homo sapiens	-	blood
GCF_918856505.1	PRJNA224116	SAMEA10885812	Scaffold	REFSEQ	98.0595	100	0	Romania	not provided	Homo sapiens	-	TS
GCF_918856515.1	PRJNA224116	SAMEA10885813	Scaffold	REFSEQ	98.0765	99.5876	0.636081	Romania	not provided	Homo sapiens	-	wound
GCF_918851135.1	PRJNA224116	SAMEA10885814	Scaffold	REFSEQ	98.1027	99.726	0	Romania	not provided	Homo sapiens	-	TS
GCF_918851165.1	PRJNA224116	SAMEA10885815	Scaffold	REFSEQ	98.0555	100	0	Romania	not provided	Homo sapiens	-	TS
GCF_918851215.1	PRJNA224116	SAMEA10885816	Scaffold	REFSEQ	98.1147	99.9813	0.664781	Romania	not provided	Homo sapiens	-	sputum
GCF_918851175.1	PRJNA224116	SAMEA10885817	Scaffold	REFSEQ	98.0271	100	0	Romania	not provided	Homo sapiens	-	bile
GCF_918851115.1	PRJNA224116	SAMEA10885818	Scaffold	REFSEQ	97.9107	99.726	0	Romania	not provided	Homo sapiens	-	wound
GCF_918851105.1	PRJNA224116	SAMEA10885819	Scaffold	REFSEQ	98.0673	99.7516	0.707724	Romania	not provided	Homo sapiens	-	urine
GCF_918851075.1	PRJNA224116	SAMEA10885820	Scaffold	REFSEQ	98.107	99.9813	0.641622	Romania	not provided	Homo sapiens	-	pus
GCF_918856805.1	PRJNA224116	SAMEA10885821	Scaffold	REFSEQ	97.908	99.726	0	Romania	not provided	Homo sapiens	-	pus
GCF_918849835.1	PRJNA224116	SAMEA10885822	Scaffold	REFSEQ	97.9282	99.726	0	Romania	not provided	Homo sapiens	-	blood
GCF_918851155.1	PRJNA224116	SAMEA10885823	Scaffold	REFSEQ	97.9258	100	0	Romania	not provided	Homo sapiens	-	TS
GCF_918811415.1	PRJNA224116	SAMEA10885824	Scaffold	REFSEQ	98.0561	100	0	Romania	not provided	Homo sapiens	-	TS
GCF_918849775.1	PRJNA224116	SAMEA10885825	Scaffold	REFSEQ	98.0563	100	0	Romania	not provided	Homo sapiens	-	pus
GCF_918849825.1	PRJNA224116	SAMEA10885826	Scaffold	REFSEQ	98.0686	99.9813	0.628046	Romania	not provided	Homo sapiens	-	pus
GCF_918849755.1	PRJNA224116	SAMEA10885827	Scaffold	REFSEQ	98.0581	100	0	Romania	not provided	Homo sapiens	-	TS
GCF_918811435.1	PRJNA224116	SAMEA10885829	Scaffold	REFSEQ	98.0569	100	0.273973	Romania	not provided	Homo sapiens	-	wound
GCF_918849725.1	PRJNA224116	SAMEA10885830	Scaffold	REFSEQ	98.0567	100	0	Romania	not provided	Homo sapiens	-	pus
GCF_962439705.1	PRJNA224116	SAMEA114227647	Scaffold	REFSEQ	98.1259	99.1939	0.628046	Hungary	2022	-	-	-
GCF_962396135.1	PRJNA224116	SAMEA114227648	Scaffold	REFSEQ	98.1655	99.5876	0.628046	Hungary	2022	-	-	-
GCF_962438995.1	PRJNA224116	SAMEA114227649	Scaffold	REFSEQ	98.1277	99.9813	0.628046	Hungary	2022	-	-	-
GCF_962439965.1	PRJNA224116	SAMEA114227650	Scaffold	REFSEQ	98.1259	99.9813	0.628046	Hungary	2022	-	-	-
GCF_962439755.1	PRJNA224116	SAMEA114227651	Scaffold	REFSEQ	98.1253	99.9813	0.628046	Hungary	2022	-	-	-
GCF_962439875.1	PRJNA224116	SAMEA114227652	Scaffold	REFSEQ	98.1204	99.9813	0.628046	Hungary	2022	-	-	-
GCF_962439775.1	PRJNA224116	SAMEA114227653	Scaffold	REFSEQ	98.114	99.9813	0.628046	Hungary	2022	-	-	-
GCF_962438975.1	PRJNA224116	SAMEA114227655	Scaffold	REFSEQ	98.1111	99.9813	0.628046	Hungary	2022	-	-	-
GCF_962439845.1	PRJNA224116	SAMEA114227656	Scaffold	REFSEQ	98.1194	99.9813	0.628046	Hungary	2022	-	-	-
GCF_962439885.1	PRJNA224116	SAMEA114227657	Scaffold	REFSEQ	98.1245	99.9813	0.628046	Hungary	2022	-	-	-
GCF_962438915.1	PRJNA224116	SAMEA114227658	Scaffold	REFSEQ	98.1318	99.9813	0.628046	Hungary	2022	-	-	-
GCF_962439955.1	PRJNA224116	SAMEA114227659	Scaffold	REFSEQ	98.1255	99.9813	0.824897	Hungary	2022	-	-	-
GCF_962439815.1	PRJNA224116	SAMEA114227660	Scaffold	REFSEQ	98.1033	99.9813	0.628046	Hungary	2022	-	-	-
GCF_962439925.1	PRJNA224116	SAMEA114227661	Scaffold	REFSEQ	98.0629	99.9813	0.628046	Hungary	2022	-	-	-
GCF_962439715.1	PRJNA224116	SAMEA114227662	Scaffold	REFSEQ	98.109	99.7844	0.628046	Hungary	2022	-	-	-
GCF_962439625.1	PRJNA224116	SAMEA114227663	Scaffold	REFSEQ	98.1138	99.7844	0.628046	Hungary	2022	-	-	-
GCF_962439605.1	PRJNA224116	SAMEA114227664	Scaffold	REFSEQ	98.1115	99.9813	0.646794	Hungary	2022	-	-	-
GCF_962439635.1	PRJNA224116	SAMEA114227665	Scaffold	REFSEQ	98.1024	99.9813	0.646794	Hungary	2022	-	-	-
GCF_962438965.1	PRJNA224116	SAMEA114227666	Scaffold	REFSEQ	98.1251	99.9813	0.658331	Hungary	2022	-	-	-
GCF_900476945.2	PRJNA224116	SAMEA1317917	Scaffold	REFSEQ	98.1241	99.9813	0.619939	Australia	2011	Homo sapiens	D88	-
GCF_900476885.2	PRJNA224116	SAMEA1317918	Scaffold	REFSEQ	97.8712	100	0	Australia	2006	Homo sapiens	D7	-
GCF_001511995.1	PRJNA224116	SAMEA1317920	Scaffold	REFSEQ	97.8914	100	0	Australia	2010	Homo sapiens	D81	wound
GCF_900118025.2	PRJNA224116	SAMEA1317921	Scaffold	REFSEQ	98.1116	99.9813	0.609299	Australia	2002	Homo sapiens	A76	-
GCF_001512155.1	PRJNA224116	SAMEA1317922	Scaffold	REFSEQ	97.8647	100	0	Australia	2009	Homo sapiens	D13	urine
GCF_900476785.2	PRJNA224116	SAMEA1317923	Scaffold	REFSEQ	97.8791	100	0	Australia	2009	Homo sapiens	D18	-
GCF_001512035.1	PRJNA224116	SAMEA1317924	Scaffold	REFSEQ	97.872	100	0	Australia	2006	Homo sapiens	D2	wound
GCF_900118115.2	PRJNA224116	SAMEA1317926	Scaffold	REFSEQ	98.1122	99.9813	0.609299	Australia	2002	Homo sapiens	A75	-
GCF_001512075.1	PRJNA224116	SAMEA1317927	Scaffold	REFSEQ	97.8725	100	0	Australia	2002	Homo sapiens	RBH3	endotracheal aspirate
GCF_900476705.2	PRJNA224116	SAMEA1317929	Scaffold	REFSEQ	97.8652	100	0.410959	Australia	2006	Homo sapiens	D4	-
GCF_001512255.1	PRJNA224116	SAMEA1317930	Scaffold	REFSEQ	97.8765	100	0	Australia	1997	Homo sapiens	D3208	blood
GCF_001512095.1	PRJNA224116	SAMEA1317931	Scaffold	REFSEQ	97.9046	100	0	Australia	2010	Homo sapiens	D62	midstream urine
GCF_900476875.2	PRJNA224116	SAMEA1317932	Scaffold	REFSEQ	97.872	100	0	Australia	2006	Homo sapiens	D3	-
GCF_900476815.2	PRJNA224116	SAMEA1317933	Scaffold	REFSEQ	97.8693	100	0	Australia	2006	Homo sapiens	D6	-
GCF_900118015.2	PRJNA224116	SAMEA1317934	Scaffold	REFSEQ	98.0961	99.932	0.609299	Australia	2002	Homo sapiens	A79	-
GCF_900118135.2	PRJNA224116	SAMEA1317936	Scaffold	REFSEQ	98.1195	99.9813	0.609299	Australia	2005	Homo sapiens	A93	-
GCF_001511915.1	PRJNA224116	SAMEA1317937	Scaffold	REFSEQ	97.8882	100	0	Australia	2010	Homo sapiens	D78	not known
GCF_900118145.2	PRJNA224116	SAMEA1317938	Scaffold	REFSEQ	98.1275	99.9813	0.609299	Australia	2007	Homo sapiens	C1	-
GCF_001512015.1	PRJNA224116	SAMEA1317939	Scaffold	REFSEQ	97.9167	100	0.136986	Australia	1998	Homo sapiens	WM98	wound
GCF_900476715.2	PRJNA224116	SAMEA1317940	Scaffold	REFSEQ	97.8764	100	0	Australia	2009	Homo sapiens	D20	-
GCF_001512175.1	PRJNA224116	SAMEA1465988	Scaffold	REFSEQ	97.8649	100	0	Australia	2002	Homo sapiens	6772166	pus
GCF_900117585.2	PRJNA224116	SAMEA1465989	Scaffold	REFSEQ	98.1119	99.9813	0.609299	Australia	2007	Homo sapiens	B2	-
GCF_900117575.2	PRJNA224116	SAMEA1465990	Scaffold	REFSEQ	98.1019	99.9813	0.609299	Australia	2005	Homo sapiens	RBH45	-
GCF_900117685.2	PRJNA224116	SAMEA1465992	Scaffold	REFSEQ	98.1219	99.9813	0.609299	Australia	2007	Homo sapiens	B8	-
GCF_900117765.2	PRJNA224116	SAMEA1465993	Scaffold	REFSEQ	98.1178	99.85	0.609299	Australia	2006	Homo sapiens	D9	-
GCF_900476755.2	PRJNA224116	SAMEA1465995	Scaffold	REFSEQ	97.8672	99.726	0	Australia	2010	Homo sapiens	D45	-
GCF_900117485.2	PRJNA224116	SAMEA1465996	Scaffold	REFSEQ	98.1147	99.9813	0.609299	Australia	2001	Homo sapiens	A72	-
GCF_900117635.2	PRJNA224116	SAMEA1465997	Scaffold	REFSEQ	98.0958	99.5876	0.609299	Australia	2002	Homo sapiens	A82	-
GCF_900117735.2	PRJNA224116	SAMEA1465998	Scaffold	REFSEQ	98.1194	99.9813	0.609299	Australia	2010	Homo sapiens	B10	-
GCF_900117935.2	PRJNA224116	SAMEA1465999	Scaffold	REFSEQ	98.1115	99.9813	0.609299	Australia	2006	Homo sapiens	D1	-
GCF_900118085.2	PRJNA224116	SAMEA1466000	Scaffold	REFSEQ	98.0944	99.8828	0.609299	Australia	2002	Homo sapiens	A77	-
GCF_900476695.2	PRJNA224116	SAMEA1466001	Scaffold	REFSEQ	98.1232	99.9813	0.609299	Australia	2010	Homo sapiens	D87	-
GCF_900117875.2	PRJNA224116	SAMEA1466002	Scaffold	REFSEQ	98.1052	99.9813	0.669152	Australia	2010	Homo sapiens	A111	-
GCF_900117695.2	PRJNA224116	SAMEA1466003	Scaffold	REFSEQ	98.1109	99.9813	0.609299	Australia	2006	Homo sapiens	D8	-
GCF_900117515.2	PRJNA224116	SAMEA1466005	Scaffold	REFSEQ	98.1121	99.9813	0.609299	Australia	2007	Homo sapiens	B1	-
GCF_900117825.2	PRJNA224116	SAMEA1466006	Scaffold	REFSEQ	98.1107	99.9813	0.609299	Australia	2002	Homo sapiens	A84	-
GCF_001512055.1	PRJNA224116	SAMEA1466008	Scaffold	REFSEQ	97.9399	100	0	Greece	2002	Homo sapiens	A388	not known
GCF_900476805.2	PRJNA224116	SAMEA1466009	Scaffold	REFSEQ	98.1238	99.932	0.609299	Australia	2010	Homo sapiens	D84	-
GCF_900117905.2	PRJNA224116	SAMEA1466010	Scaffold	REFSEQ	98.1169	99.9813	0.609299	Australia	2004	Homo sapiens	A87	-
GCF_001511975.1	PRJNA224116	SAMEA1466011	Scaffold	REFSEQ	97.9071	100	0	Australia	2005	Homo sapiens	A92	urine
GCF_900117845.2	PRJNA224116	SAMEA1466013	Scaffold	REFSEQ	98.0995	99.9813	0.609299	Australia	2002	Homo sapiens	C18	-
GCF_900117555.2	PRJNA224116	SAMEA1466015	Scaffold	REFSEQ	98.1201	99.9813	0.609299	Australia	2001	Homo sapiens	A73	-
GCF_900118005.2	PRJNA224116	SAMEA1466017	Scaffold	REFSEQ	98.1091	99.9813	0.609299	Australia	2002	Homo sapiens	A78	-
GCF_900118105.2	PRJNA224116	SAMEA1466018	Scaffold	REFSEQ	98.1036	99.9813	0.609299	Australia	2002	Homo sapiens	A74	-
GCF_900117815.2	PRJNA224116	SAMEA1466019	Scaffold	REFSEQ	98.1168	99.85	0.609299	Australia	2007	Homo sapiens	B6	-
GCF_900490105.2	PRJNA224116	SAMEA1466020	Scaffold	REFSEQ	98.1132	99.9813	0.628046	Australia	2010	Homo sapiens	D86	-
GCF_900117885.2	PRJNA224116	SAMEA1466021	Scaffold	REFSEQ	98.1109	99.8688	0.609299	Australia	2006	Homo sapiens	C15	-
GCF_900117725.2	PRJNA224116	SAMEA1466022	Scaffold	REFSEQ	98.0558	99.9813	0.609299	Australia	2006	Homo sapiens	C13	-
GCF_900489505.2	PRJNA224116	SAMEA1466023	Scaffold	REFSEQ	98.1136	99.9813	0.609299	Australia	-	Homo sapiens	MH50	-
GCF_900117505.2	PRJNA224116	SAMEA1466024	Scaffold	REFSEQ	98.1167	99.9616	0.609299	Australia	2007	Homo sapiens	C2	-
GCF_900117565.2	PRJNA224116	SAMEA1466025	Scaffold	REFSEQ	98.035	99.8411	0.609299	Australia	2006	Homo sapiens	C14	-
GCF_900117975.2	PRJNA224116	SAMEA1466026	Scaffold	REFSEQ	98.1085	99.9813	0.609299	Australia	2002	Homo sapiens	A81	-
GCF_001512195.1	PRJNA224116	SAMEA1466028	Scaffold	REFSEQ	97.8938	100	0	Australia	2003	Homo sapiens	G7	not known
GCF_900476865.2	PRJNA224116	SAMEA1466029	Scaffold	REFSEQ	98.1199	99.9813	0.609299	Australia	2010	Homo sapiens	D77	-
GCF_900476675.2	PRJNA224116	SAMEA1466030	Scaffold	REFSEQ	98.1037	99.951	0.609299	Australia	2010	Homo sapiens	D85	-
GCF_900117675.2	PRJNA224116	SAMEA1466032	Scaffold	REFSEQ	98.1081	99.9813	0.609299	Australia	2001	Homo sapiens	RBH11	-
GCF_900117705.2	PRJNA224116	SAMEA1466033	Scaffold	REFSEQ	98.0883	99.932	0.609299	Australia	2007	Homo sapiens	C3	-
GCF_900117605.2	PRJNA224116	SAMEA1466034	Scaffold	REFSEQ	98.112	99.9813	0.609299	Australia	2007	Homo sapiens	C8	-
GCF_900117795.2	PRJNA224116	SAMEA1466035	Scaffold	REFSEQ	98.0899	99.9313	0.658511	Australia	2009	Homo sapiens	E16	-
GCF_900117775.2	PRJNA224116	SAMEA1466036	Scaffold	REFSEQ	98.1047	99.7188	0.609299	Australia	2007	Homo sapiens	C4	-
GCF_900476775.2	PRJNA224116	SAMEA1466037	Scaffold	REFSEQ	97.8631	99.863	0	Australia	2010	Homo sapiens	D48	-
GCF_900117965.2	PRJNA224116	SAMEA1466038	Scaffold	REFSEQ	98.0818	99.9813	0.609299	Australia	2002	Homo sapiens	C20	-
GCF_900117625.2	PRJNA224116	SAMEA1466039	Scaffold	REFSEQ	98.1211	99.9813	0.609299	Australia	2005	Homo sapiens	A94	-
GCF_900476795.2	PRJNA224116	SAMEA1466040	Scaffold	REFSEQ	98.1141	99.9025	0.609299	Australia	2010	Homo sapiens	D79	-
GCF_900117995.2	PRJNA224116	SAMEA1466042	Scaffold	REFSEQ	98.1138	99.9813	0.609299	Australia	2001	Homo sapiens	RBH36	-
GCF_900117805.2	PRJNA224116	SAMEA1466043	Scaffold	REFSEQ	98.1323	99.9813	0.609299	Australia	2010	Homo sapiens	D52	-
GCF_900117755.2	PRJNA224116	SAMEA1466047	Scaffold	REFSEQ	98.1112	99.9455	0.609299	Australia	2008	Homo sapiens	D37	-
GCF_900117495.2	PRJNA224116	SAMEA1466048	Scaffold	REFSEQ	98.1073	99.9813	0.609299	Australia	2005	Homo sapiens	A96	-
GCF_900117475.2	PRJNA224116	SAMEA1466049	Scaffold	REFSEQ	98.1208	99.951	0.609299	Australia	2007	Homo sapiens	B5	-
GCF_900117615.2	PRJNA224116	SAMEA1466050	Scaffold	REFSEQ	98.1301	99.9813	0.609299	Australia	2010	Homo sapiens	D54	-
GCF_001512135.1	PRJNA224116	SAMEA1466052	Scaffold	REFSEQ	97.8694	100	0.273973	Australia	2003	Homo sapiens	A85	sputum
GCF_900476665.2	PRJNA224116	SAMEA1466053	Scaffold	REFSEQ	97.8764	99.863	0.136986	Australia	2010	Homo sapiens	D46	-
GCF_900118035.2	PRJNA224116	SAMEA1466054	Scaffold	REFSEQ	98.112	99.9813	0.609299	Australia	2002	Homo sapiens	A80	-
GCF_900117595.2	PRJNA224116	SAMEA1466055	Scaffold	REFSEQ	98.1117	99.9813	0.609299	Australia	2007	Homo sapiens	C5	-
GCF_001511935.1	PRJNA224116	SAMEA1466056	Scaffold	REFSEQ	97.871	100	0	Australia	2008	Homo sapiens	D30	wound
GCF_900117715.2	PRJNA224116	SAMEA1466057	Scaffold	REFSEQ	98.1112	99.9813	0.609299	Australia	2002	Homo sapiens	RBH18	-
GCF_900117915.2	PRJNA224116	SAMEA1466060	Scaffold	REFSEQ	98.1063	99.85	0.609299	Australia	2005	Homo sapiens	A97	-
GCF_900117985.2	PRJNA224116	SAMEA1466061	Scaffold	REFSEQ	98.1018	99.9509	0.609299	Australia	2010	Homo sapiens	D72	-
GCF_900117955.2	PRJNA224116	SAMEA1466064	Scaffold	REFSEQ	98.1093	99.934	0.609299	Australia	2005	Homo sapiens	A91	-
GCF_900117545.2	PRJNA224116	SAMEA1466065	Scaffold	REFSEQ	98.1171	99.9813	0.609299	Australia	2007	Homo sapiens	D12	-
GCF_900117665.2	PRJNA224116	SAMEA1466066	Scaffold	REFSEQ	98.1295	99.9813	0.609299	Australia	2010	Homo sapiens	D56	-
GCF_900476565.2	PRJNA224116	SAMEA1466068	Scaffold	REFSEQ	98.0974	98.9777	0.642107	Australia	1985	Homo sapiens	KT-A24	-
GCF_900117925.2	PRJNA224116	SAMEA1466069	Scaffold	REFSEQ	98.1092	99.9616	0.609299	Australia	2006	Homo sapiens	D5	-
GCF_900117835.2	PRJNA224116	SAMEA1466070	Scaffold	REFSEQ	98.1242	99.9813	0.609299	Australia	2008	Homo sapiens	D24	-
GCF_900117865.2	PRJNA224116	SAMEA1466071	Scaffold	REFSEQ	98.129	99.9813	0.609299	Australia	2010	Homo sapiens	D57	-
GCF_900117645.2	PRJNA224116	SAMEA1466072	Scaffold	REFSEQ	98.1177	99.7844	0.609299	Australia	2007	Homo sapiens	B4	-
GCF_900117855.2	PRJNA224116	SAMEA1466073	Scaffold	REFSEQ	98.098	99.9813	0.609299	Australia	2002	Homo sapiens	RBH1	-
GCF_900117535.2	PRJNA224116	SAMEA1466074	Scaffold	REFSEQ	98.0849	99.85	0.658511	Australia	2006	Homo sapiens	E1	-
GCF_900476585.2	PRJNA224116	SAMEA1466076	Scaffold	REFSEQ	98.0748	99.9813	0.609299	Australia	1987	Homo sapiens	KT-A25	-
GCF_900476685.2	PRJNA224116	SAMEA1466077	Scaffold	REFSEQ	97.8734	100	0	Australia	2009	Homo sapiens	D14	-
GCF_900117525.2	PRJNA224116	SAMEA1466078	Scaffold	REFSEQ	98.1045	99.9813	0.609299	Australia	2000	Homo sapiens	RBH38	-
GCF_900117945.2	PRJNA224116	SAMEA1466079	Scaffold	REFSEQ	98.1071	99.7516	0.609299	Australia	1999	Homo sapiens	WM99c	-
GCF_900117895.2	PRJNA224116	SAMEA1466080	Scaffold	REFSEQ	98.1163	99.932	0.609299	Australia	2007	Homo sapiens	B3	-
GCF_900117655.2	PRJNA224116	SAMEA1466081	Scaffold	REFSEQ	98.1278	99.9813	0.609299	Australia	2010	Homo sapiens	D51	-
GCF_001512235.1	PRJNA224116	SAMEA1466082	Scaffold	REFSEQ	97.9048	100	0	Australia	2002	Homo sapiens	A83	not known
GCF_900117745.2	PRJNA224116	SAMEA1466083	Scaffold	REFSEQ	98.1043	99.85	0.609299	Australia	2010	Homo sapiens	D58	-
GCF_900478055.2	PRJNA224116	SAMEA1569537	Scaffold	REFSEQ	97.8277	100	0	Viet Nam	-	Homo sapiens	NCSR_106	-
GCF_900478075.2	PRJNA224116	SAMEA1569541	Scaffold	REFSEQ	97.8426	100	0	Viet Nam	-	Homo sapiens	NCSR_132	-
GCF_900477685.2	PRJNA224116	SAMEA1709619	Scaffold	REFSEQ	98.0984	99.9813	0.609299	Australia	2000	Homo sapiens	J18	-
GCF_900477255.2	PRJNA224116	SAMEA1709622	Scaffold	REFSEQ	98.0999	99.9813	0.609299	Australia	2006	Homo sapiens	H26	-
GCF_900477585.2	PRJNA224116	SAMEA1709630	Scaffold	REFSEQ	98.1053	99.5876	0.609299	Australia	2004	Homo sapiens	I13	-
GCF_900477365.2	PRJNA224116	SAMEA1709631	Scaffold	REFSEQ	98.0976	99.9813	0.609299	Australia	2006	Homo sapiens	H27	-
GCF_900477105.2	PRJNA224116	SAMEA1709642	Scaffold	REFSEQ	98.0989	99.9813	0.609299	Australia	2006	Homo sapiens	H28	-
GCF_900476965.2	PRJNA224116	SAMEA1709647	Scaffold	REFSEQ	97.8735	100	0	Australia	2011	Homo sapiens	D108	-
GCF_900477125.2	PRJNA224116	SAMEA1709650	Scaffold	REFSEQ	98.1104	99.9813	0.806149	Australia	2006	Homo sapiens	H29	-
GCF_900476955.2	PRJNA224116	SAMEA1709651	Scaffold	REFSEQ	98.1149	99.9813	0.609299	Australia	2011	Homo sapiens	D93	-
GCF_900476935.2	PRJNA224116	SAMEA1709657	Scaffold	REFSEQ	98.1224	99.9813	0.609299	Australia	2011	Homo sapiens	D92	-
GCF_900477505.2	PRJNA224116	SAMEA1709661	Scaffold	REFSEQ	98.1069	99.0954	0.609299	Australia	2004	Homo sapiens	I10	-
GCF_900477395.2	PRJNA224116	SAMEA1709668	Scaffold	REFSEQ	98.0981	99.5258	0.609299	Australia	2004	Homo sapiens	I9	-
GCF_900477385.2	PRJNA224116	SAMEA1709678	Scaffold	REFSEQ	98.128	99.5679	0.609299	Australia	2004	Homo sapiens	I12	-
GCF_900477115.2	PRJNA224116	SAMEA1709682	Scaffold	REFSEQ	98.0922	99.6532	0.609299	Australia	2005	Homo sapiens	H24	-
GCF_900477555.2	PRJNA224116	SAMEA1709683	Scaffold	REFSEQ	98.072	99.7516	0.609299	Australia	2004	Homo sapiens	I11	-
GCF_900477225.2	PRJNA224116	SAMEA1709684	Scaffold	REFSEQ	98.1108	99.9813	0.609299	Australia	2006	Homo sapiens	H25	-
GCF_900477415.2	PRJNA224116	SAMEA1709691	Scaffold	REFSEQ	98.0966	99.9813	0.609299	Australia	2003	Homo sapiens	I5	-
GCF_900476975.2	PRJNA224116	SAMEA1709695	Scaffold	REFSEQ	98.1081	99.4891	0.806149	Australia	2011	Homo sapiens	D112	-
GCF_900477455.2	PRJNA224116	SAMEA1709699	Scaffold	REFSEQ	97.9216	100	0	Australia	1996	Homo sapiens	J4	-
GCF_900476735.2	PRJNA224116	SAMEA1709701	Scaffold	REFSEQ	97.8277	100	0	Australia	1997	Homo sapiens	WM97a	-
GCF_900477465.2	PRJNA224116	SAMEA1709705	Scaffold	REFSEQ	98.1032	99.9813	0.609299	Australia	2003	Homo sapiens	I4	-
GCF_900477055.2	PRJNA224116	SAMEA1709708	Scaffold	REFSEQ	98.1273	99.3907	0.609299	Australia	2011	Homo sapiens	D114	-
GCF_900477045.2	PRJNA224116	SAMEA1709710	Scaffold	REFSEQ	98.1142	99.9813	0.609299	Australia	2000	Homo sapiens	H1	-
GCF_900477595.2	PRJNA224116	SAMEA1709711	Scaffold	REFSEQ	98.1169	99.5876	0.609299	Australia	2004	Homo sapiens	I7	-
GCF_900477485.2	PRJNA224116	SAMEA1709718	Scaffold	REFSEQ	98.1115	99.7844	0.609299	Australia	2004	Homo sapiens	I8	-
GCF_900477435.2	PRJNA224116	SAMEA1709720	Scaffold	REFSEQ	97.9262	100	0	Australia	1996	Homo sapiens	J3	-
GCF_900477015.2	PRJNA224116	SAMEA1709723	Scaffold	REFSEQ	98.1102	99.9813	0.609299	Australia	2000	Homo sapiens	H2	-
GCF_900477405.2	PRJNA224116	SAMEA1709725	Scaffold	REFSEQ	98.0865	99.9072	0.609299	Australia	2003	Homo sapiens	I6	-
GCF_900477445.2	PRJNA224116	SAMEA1709732	Scaffold	REFSEQ	97.9208	100	0	Australia	1995	Homo sapiens	J2	-
GCF_900477035.2	PRJNA224116	SAMEA1709736	Scaffold	REFSEQ	98.1196	99.9156	0.609299	Australia	2001	Homo sapiens	H3	-
GCF_001511875.1	PRJNA224116	SAMEA1709744	Scaffold	REFSEQ	97.9143	100	0	Australia	1995	Homo sapiens	J1	not known
GCF_900476855.2	PRJNA224116	SAMEA1709745	Scaffold	REFSEQ	98.1081	99.9625	0.639584	Australia	2000	Homo sapiens	WM00	-
GCF_900477545.2	PRJNA224116	SAMEA1709747	Scaffold	REFSEQ	98.1096	99.9813	0.609299	Australia	2005	Homo sapiens	I19	-
GCF_001512215.1	PRJNA224116	SAMEA1709749	Scaffold	REFSEQ	97.8744	99.726	0.136986	Netherlands	1984	Homo sapiens	A297	not known
GCF_900118155.2	PRJNA224116	SAMEA1709750	Scaffold	REFSEQ	98.0606	99.9813	0.628046	Singapore	2011	Homo sapiens	DR33499	-
GCF_900118055.2	PRJNA224116	SAMEA1709753	Scaffold	REFSEQ	98.1161	99.9813	0.857705	Singapore	2009	Homo sapiens	DB16485	-
GCF_900118125.2	PRJNA224116	SAMEA1709760	Scaffold	REFSEQ	98.1104	99.9813	0.609299	Singapore	1996	Homo sapiens	DR21208	-
GCF_900477565.2	PRJNA224116	SAMEA1709761	Scaffold	REFSEQ	98.0957	99.5663	0.609299	Australia	2006	Homo sapiens	I20	-
GCF_900477575.2	PRJNA224116	SAMEA1709767	Scaffold	REFSEQ	98.098	99.9677	0.609299	Australia	2005	Homo sapiens	I17	-
GCF_900476825.2	PRJNA224116	SAMEA1709768	Scaffold	REFSEQ	97.9245	100	0	Australia	1998	Homo sapiens	WM98c	-
GCF_900477515.2	PRJNA224116	SAMEA1709780	Scaffold	REFSEQ	98.1206	99.9813	0.609299	Australia	2005	Homo sapiens	I16	-
GCF_900476835.2	PRJNA224116	SAMEA1709785	Scaffold	REFSEQ	98.1173	99.9813	0.609299	Australia	1999	Homo sapiens	WM99a	-
GCF_900477355.2	PRJNA224116	SAMEA1709794	Scaffold	REFSEQ	98.1034	99.9813	0.609299	Australia	2006	Homo sapiens	H35	-
GCF_900477235.2	PRJNA224116	SAMEA1709798	Scaffold	REFSEQ	98.1186	99.9156	0.609299	Australia	2001	Homo sapiens	H7	-
GCF_900477695.2	PRJNA224116	SAMEA1709803	Scaffold	REFSEQ	98.1076	99.9813	0.609299	Australia	2000	Homo sapiens	J17	-
GCF_900476995.2	PRJNA224116	SAMEA1709806	Scaffold	REFSEQ	98.1149	99.9813	0.609299	Australia	2001	Homo sapiens	H6	-
GCF_900118045.2	PRJNA224116	SAMEA1709808	Scaffold	REFSEQ	98.1006	99.9813	0.628046	Singapore	2007	Homo sapiens	DB15354	-
GCF_900477625.2	PRJNA224116	SAMEA1709812	Scaffold	REFSEQ	98.1071	99.9484	0.609299	Australia	1999	Homo sapiens	J20	-
GCF_900477145.2	PRJNA224116	SAMEA1709813	Scaffold	REFSEQ	98.0995	99.9813	0.609299	Australia	2001	Homo sapiens	H10	-
GCF_900477535.2	PRJNA224116	SAMEA1709816	Scaffold	REFSEQ	98.1204	99.9813	0.609299	Australia	2004	Homo sapiens	I14	-
GCF_900118095.2	PRJNA224116	SAMEA1709824	Scaffold	REFSEQ	98.0622	99.9813	0.609299	Singapore	2007	Homo sapiens	DB24441	-
GCF_900477315.2	PRJNA224116	SAMEA1709825	Scaffold	REFSEQ	98.0866	99.9813	0.609299	Australia	2006	Homo sapiens	H38	-
GCF_900477655.2	PRJNA224116	SAMEA1709827	Scaffold	REFSEQ	98.0928	99.9813	0.609299	Australia	1999	Homo sapiens	J19	-
GCF_900477165.2	PRJNA224116	SAMEA1709828	Scaffold	REFSEQ	98.1031	99.9813	0.609299	Australia	2001	Homo sapiens	H9	-
GCF_900477605.2	PRJNA224116	SAMEA1709830	Scaffold	REFSEQ	98.0718	99.3549	0.609299	Australia	2004	Homo sapiens	I15	-
GCF_900477285.2	PRJNA224116	SAMEA1709834	Scaffold	REFSEQ	98.0926	99.5876	0.609299	Australia	2006	Homo sapiens	H36	-
GCF_900118065.2	PRJNA224116	SAMEA1709836	Scaffold	REFSEQ	98.0556	99.9813	0.628046	Singapore	2011	Homo sapiens	DR33831	-
GCF_900477295.2	PRJNA224116	SAMEA1709841	Scaffold	REFSEQ	98.1022	99.9813	0.609299	Australia	2006	Homo sapiens	H37	-
GCF_001511855.1	PRJNA224116	SAMEA1709843	Scaffold	REFSEQ	97.9062	99.6575	0.136986	Australia	1999	Homo sapiens	J10	not known
GCF_900477185.2	PRJNA224116	SAMEA1709845	Scaffold	REFSEQ	98.1006	99.9813	0.609299	Australia	2001	Homo sapiens	H8	-
GCF_900477615.2	PRJNA224116	SAMEA1709846	Scaffold	REFSEQ	98.0892	99.5876	0.639584	Australia	2000	Homo sapiens	J22	-
GCF_900476925.2	PRJNA224116	SAMEA1709847	Scaffold	REFSEQ	98.1142	99.9813	0.609299	Australia	2011	Homo sapiens	D107	-
GCF_001512115.1	PRJNA224116	SAMEA1709848	Scaffold	REFSEQ	97.9116	100	0.136986	Australia	1998	Homo sapiens	J7	not known
GCF_900476915.2	PRJNA224116	SAMEA1709859	Scaffold	REFSEQ	98.0988	99.9813	0.609299	Australia	2011	Homo sapiens	D101	-
GCF_900477275.2	PRJNA224116	SAMEA1709860	Scaffold	REFSEQ	98.1043	99.9813	0.609299	Australia	2003	Homo sapiens	H12	-
GCF_900477155.2	PRJNA224116	SAMEA1709864	Scaffold	REFSEQ	98.1065	99.9436	0.609299	Australia	2001	Homo sapiens	H11	-
GCF_900477715.2	PRJNA224116	SAMEA1709867	Scaffold	REFSEQ	98.0965	99.9813	0.639584	Australia	2000	Homo sapiens	J21	-
GCF_900476895.2	PRJNA224116	SAMEA1709878	Scaffold	REFSEQ	98.1258	99.9813	0.609299	Australia	2011	Homo sapiens	D98	-
GCF_900477525.2	PRJNA224116	SAMEA1709879	Scaffold	REFSEQ	97.9053	99.863	0.136986	Australia	1998	Homo sapiens	J8	-
GCF_001511895.1	PRJNA224116	SAMEA1709886	Scaffold	REFSEQ	97.9117	99.6347	0	Australia	1997	Homo sapiens	J5	not known
GCF_900476905.2	PRJNA224116	SAMEA1709894	Scaffold	REFSEQ	98.1198	99.9813	0.609299	Australia	2011	Homo sapiens	D97	-
GCF_900477725.2	PRJNA224116	SAMEA1709897	Scaffold	REFSEQ	98.1016	99.9813	0.609299	Australia	2008	Homo sapiens	K2	-
GCF_900477025.2	PRJNA224116	SAMEA1709902	Scaffold	REFSEQ	98.1202	99.9813	0.609299	Australia	2011	Homo sapiens	D96	-
GCF_900477475.2	PRJNA224116	SAMEA1709903	Scaffold	REFSEQ	97.9209	100	0	Australia	1997	Homo sapiens	J6	-
GCF_900490085.2	PRJNA224116	SAMEA1709906	Scaffold	REFSEQ	98.1008	99.9813	0.609299	Australia	2005	Homo sapiens	H23	-
GCF_900477845.2	PRJNA224116	SAMEA1709910	Scaffold	REFSEQ	98.1029	99.9813	0.609299	Australia	2005	Homo sapiens	K1	-
GCF_900477205.2	PRJNA224116	SAMEA1709912	Scaffold	REFSEQ	98.1037	99.9813	0.609299	Australia	2003	Homo sapiens	H13	-
GCF_900477215.2	PRJNA224116	SAMEA1709923	Scaffold	REFSEQ	98.1024	99.9813	0.609299	Australia	2005	Homo sapiens	H22	-
GCF_900477425.2	PRJNA224116	SAMEA1709931	Scaffold	REFSEQ	98.0088	99.8202	0.609299	Australia	2001	Homo sapiens	I3	-
GCF_900477175.2	PRJNA224116	SAMEA1709932	Scaffold	REFSEQ	98.1086	99.9813	0.609299	Australia	2005	Homo sapiens	H21	-
GCF_900477855.2	PRJNA224116	SAMEA1709934	Scaffold	REFSEQ	98.1	99.9813	0.609299	Australia	2008	Homo sapiens	K3	-
GCF_900477135.2	PRJNA224116	SAMEA1709941	Scaffold	REFSEQ	98.1113	99.8828	0.609299	Australia	2005	Homo sapiens	H20	-
GCF_900477265.2	PRJNA224116	SAMEA1709948	Scaffold	REFSEQ	98.1102	99.527	0.609299	Australia	2005	Homo sapiens	H19	-
GCF_900477195.2	PRJNA224116	SAMEA1709958	Scaffold	REFSEQ	98.0981	99.5876	0.609299	Australia	2004	Homo sapiens	H18	-
GCF_900477375.2	PRJNA224116	SAMEA1709961	Scaffold	REFSEQ	98.1077	99.9813	0.609299	Australia	2006	Homo sapiens	H33	-
GCF_900477085.2	PRJNA224116	SAMEA1709965	Scaffold	REFSEQ	98.1228	99.9813	0.609299	Australia	2004	Homo sapiens	H17	-
GCF_900477325.2	PRJNA224116	SAMEA1709967	Scaffold	REFSEQ	98.1004	99.9605	0.740532	Australia	2006	Homo sapiens	H39	-
GCF_900477065.2	PRJNA224116	SAMEA1709968	Scaffold	REFSEQ	98.0981	99.3907	0.609299	Australia	2004	Homo sapiens	H16	-
GCF_900477245.2	PRJNA224116	SAMEA1709976	Scaffold	REFSEQ	98.1078	99.9813	0.609299	Australia	2006	Homo sapiens	H30	-
GCF_900477075.2	PRJNA224116	SAMEA1709980	Scaffold	REFSEQ	98.0923	99.4045	0.609299	Australia	2004	Homo sapiens	H15	-
GCF_900477495.2	PRJNA224116	SAMEA1709981	Scaffold	REFSEQ	98.1037	99.9813	0.609299	Australia	2001	Homo sapiens	I2	-
GCF_900476985.2	PRJNA224116	SAMEA1709985	Scaffold	REFSEQ	98.1157	99.951	0.609299	Australia	2001	Homo sapiens	H5	-
GCF_900477345.2	PRJNA224116	SAMEA1709986	Scaffold	REFSEQ	98.1042	99.7213	0.609299	Australia	2001	Homo sapiens	I1	-
GCF_900477095.2	PRJNA224116	SAMEA1709991	Scaffold	REFSEQ	98.0868	99.9813	0.609299	Australia	2003	Homo sapiens	H14	-
GCF_900477335.2	PRJNA224116	SAMEA1709993	Scaffold	REFSEQ	98.0941	99.9813	0.609299	Australia	2006	Homo sapiens	H34	-
GCF_900477005.2	PRJNA224116	SAMEA1709994	Scaffold	REFSEQ	98.0932	99.7844	0.609299	Australia	2001	Homo sapiens	H4	-
GCF_900477305.2	PRJNA224116	SAMEA1709995	Scaffold	REFSEQ	98.1403	99.9813	0.609299	Australia	2007	Homo sapiens	H41	-
GCF_900118075.2	PRJNA224116	SAMEA1710000	Scaffold	REFSEQ	98.117	99.9813	0.628046	Singapore	2006	Homo sapiens	DR547	-
GCF_900490095.2	PRJNA224116	SAMEA1876472	Scaffold	REFSEQ	97.878	100	0	Australia	2008	Homo sapiens	D27	-
GCF_900477915.2	PRJNA224116	SAMEA1876474	Scaffold	REFSEQ	97.922	100	0.273973	Australia	-	Homo sapiens	RCH51	-
GCF_900477875.2	PRJNA224116	SAMEA1876479	Scaffold	REFSEQ	97.9668	100	0.136986	Australia	2009	Homo sapiens	D23	-
GCF_900478085.2	PRJNA224116	SAMEA1876480	Scaffold	REFSEQ	98.1069	99.9813	0.609299	Australia	2002	Homo sapiens	F27	-
GCF_900477765.2	PRJNA224116	SAMEA1876481	Scaffold	REFSEQ	98.1056	99.9813	0.609299	Australia	2002	Homo sapiens	F29	-
GCF_900477965.2	PRJNA224116	SAMEA1876482	Scaffold	REFSEQ	98.1051	99.9813	0.609299	Australia	2000	Homo sapiens	F26	-
GCF_900477935.2	PRJNA224116	SAMEA1876483	Scaffold	REFSEQ	98.1	99.9455	0.609299	Australia	2002	Homo sapiens	F22	-
GCF_900477955.2	PRJNA224116	SAMEA1876484	Scaffold	REFSEQ	98.0971	99.9375	0.609299	Australia	2002	Homo sapiens	F19	-
GCF_900477805.2	PRJNA224116	SAMEA1876485	Scaffold	REFSEQ	98.1029	99.9813	0.609299	Australia	2003	Homo sapiens	K8	-
GCF_900477755.2	PRJNA224116	SAMEA1876486	Scaffold	REFSEQ	98.094	99.7844	0.609299	Australia	2002	Homo sapiens	K9	-
GCF_900477865.2	PRJNA224116	SAMEA1876487	Scaffold	REFSEQ	98.1043	99.1803	0.609299	Australia	2004	Homo sapiens	K18	-
GCF_900477795.2	PRJNA224116	SAMEA1876488	Scaffold	REFSEQ	98.1062	99.9813	0.215598	Australia	2003	Homo sapiens	K20	-
GCF_900477775.2	PRJNA224116	SAMEA1876489	Scaffold	REFSEQ	98.1068	99.9813	0.609299	Australia	2002	Homo sapiens	K10	-
GCF_900478005.2	PRJNA224116	SAMEA1876490	Scaffold	REFSEQ	98.1049	99.9813	0.609299	Australia	2004	Homo sapiens	K19	-
GCF_900477815.2	PRJNA224116	SAMEA1876491	Scaffold	REFSEQ	98.1019	99.9813	0.609299	Australia	2004	Homo sapiens	K21	-
GCF_900477705.2	PRJNA224116	SAMEA1876494	Scaffold	REFSEQ	98.0989	99.9813	0.609299	Australia	2003	Homo sapiens	K7	-
GCF_900477785.2	PRJNA224116	SAMEA1876496	Scaffold	REFSEQ	98.105	99.1939	0.609299	Australia	2004	Homo sapiens	K15	-
GCF_900477645.2	PRJNA224116	SAMEA1876497	Scaffold	REFSEQ	98.0929	99.9813	0.609299	Australia	2003	Homo sapiens	K14	-
GCF_900477675.2	PRJNA224116	SAMEA1876498	Scaffold	REFSEQ	98.117	98.6689	0.215598	Australia	2004	Homo sapiens	K13	-
GCF_900477665.2	PRJNA224116	SAMEA1876499	Scaffold	REFSEQ	98.0941	99.9455	0.609299	Australia	2003	Homo sapiens	K12	-
GCF_900477635.2	PRJNA224116	SAMEA1876500	Scaffold	REFSEQ	98.0951	99.9813	0.609299	Australia	2003	Homo sapiens	K11	-
GCF_900477825.2	PRJNA224116	SAMEA1876501	Scaffold	REFSEQ	98.0897	99.9813	0.609299	Australia	2004	Homo sapiens	K16	-
GCF_900477835.2	PRJNA224116	SAMEA1876502	Scaffold	REFSEQ	98.1025	99.9813	0.609299	Australia	2003	Homo sapiens	K5	-
GCF_900477745.2	PRJNA224116	SAMEA1876504	Scaffold	REFSEQ	98.0968	99.85	0.609299	Australia	2008	Homo sapiens	K4	-
GCF_900477735.2	PRJNA224116	SAMEA1876508	Scaffold	REFSEQ	98.095	99.9813	0.609299	Australia	2003	Homo sapiens	K6	-
GCF_001373535.1	PRJNA224116	SAMEA3296319	Scaffold	REFSEQ	97.8925	100	0.136986	India	-	-	-	Clinical sample, endotracheal aspirate
GCF_001373575.1	PRJNA224116	SAMEA3298507	Scaffold	REFSEQ	97.9012	100	0	India	-	-	-	Clinical sample, sputum.
GCF_900493605.1	PRJNA224116	SAMEA4394741	Scaffold	REFSEQ	97.9161	100	0	Thailand	2016	Homo sapiens	4300STDY6542371	not available
GCF_900493395.1	PRJNA224116	SAMEA4394742	Scaffold	REFSEQ	98.1168	99.9277	1.50313	Thailand	2016	Homo sapiens	4300STDY6542372	not available
GCF_900493565.1	PRJNA224116	SAMEA4394745	Scaffold	REFSEQ	98.1367	99.9813	1.07096	Thailand	2016	Homo sapiens	4300STDY6542375	not available
GCF_900493585.1	PRJNA224116	SAMEA4394746	Scaffold	REFSEQ	97.9099	100	1.42409	Thailand	2016	Homo sapiens	4300STDY6542376	not available
GCF_900493575.1	PRJNA224116	SAMEA4394750	Scaffold	REFSEQ	97.9784	100	0.0342466	Thailand	2016	Homo sapiens	4300STDY6542380	not available
GCF_929606275.1	PRJNA224116	SAMEA5226451	Scaffold	REFSEQ	98.0571	100	0.365297	United Kingdom	2017	Homo sapiens	cpe016	screen
GCF_929618485.1	PRJNA224116	SAMEA5226469	Scaffold	REFSEQ	98.0823	99.9813	0.609299	United Kingdom	2018	Homo sapiens	cpe044	sputum
GCF_929615215.1	PRJNA224116	SAMEA5226470	Scaffold	REFSEQ	98.1299	99.9813	0.628046	United Kingdom	2018	Homo sapiens	cpe045	screen
GCF_929606855.1	PRJNA224116	SAMEA5226473	Scaffold	REFSEQ	97.9285	99.726	0	United Kingdom	2018	Homo sapiens	cpe048	screen
GCF_929618925.1	PRJNA224116	SAMEA5226480	Scaffold	REFSEQ	98.1074	99.6438	0.628046	United Kingdom	2018	Homo sapiens	cpe055	blood
GCF_901484985.1	PRJNA224116	SAMEA5603545	Scaffold	REFSEQ	98.0375	99.5248	0.628046	-	-	-	-	-
GCF_929618345.1	PRJNA224116	SAMEA6451095	Scaffold	REFSEQ	98.0679	99.9813	0.619939	United Kingdom	2018	Homo sapiens	cpe077	biliary fluid
GCF_929618185.1	PRJNA224116	SAMEA6451152	Scaffold	REFSEQ	98.0454	100	0	United Kingdom	2017	Homo sapiens	cpe011	screen
GCF_900117785.1	PRJNA224116	SAMEA893020	Scaffold	REFSEQ	98.116	99.9813	0.609299	Australia	2007	Homo sapiens	Ab7	-
GCF_000163375.2	PRJNA224116	SAMN00189090	Scaffold	REFSEQ	97.9573	100	0.273973	not determined	not determined	Homo sapiens	6013113	skin
GCF_000163355.2	PRJNA224116	SAMN00189091	Scaffold	REFSEQ	97.9865	100	0.273973	not determined	not determined	Homo sapiens	6013150	skin
GCF_000163395.2	PRJNA224116	SAMN00189092	Scaffold	REFSEQ	98.0945	99.9813	0.609299	not determined	not determined	Homo sapiens	6014059	skin
GCF_000367885.1	PRJNA224116	SAMN01087912	Scaffold	REFSEQ	98.1463	99.9813	0.609299	Czech Republic	1991	Homo sapiens	NIPH 24	urine
GCF_000368545.1	PRJNA224116	SAMN01087913	Scaffold	REFSEQ	97.9789	100	0.0913242	Czech Republic	1992	Homo sapiens	NIPH 60	sputum
GCF_000413915.1	PRJNA224116	SAMN01828139	Scaffold	REFSEQ	97.9525	100	0.273973	Czech Republic	1996	Homo sapiens	NIPH 410	Cannula
GCF_000369385.1	PRJNA224116	SAMN01828140	Scaffold	REFSEQ	99.9915	99.6347	0	Unknown	1900/1948	Homo sapiens	CIP 70.34	urine
GCF_000369365.1	PRJNA224116	SAMN01828141	Scaffold	REFSEQ	97.8857	100	0	Czech Republic	2011	Homo sapiens	ANC 4097	tracheal aspirate
GCF_000369345.1	PRJNA224116	SAMN01828142	Scaffold	REFSEQ	98.0213	100	0.136986	Czech Republic	1993	Homo sapiens	NIPH 80	I.V. Cannula
GCF_000369325.1	PRJNA224116	SAMN01828143	Scaffold	REFSEQ	97.9471	100	0	Czech Republic	1994	Homo sapiens	NIPH 290	urine
GCF_000369305.1	PRJNA224116	SAMN01828144	Scaffold	REFSEQ	97.98	100	0.273973	Czech Republic	1992	Homo sapiens	NIPH 70	Tracheal secretion
GCF_000369285.1	PRJNA224116	SAMN01828145	Scaffold	REFSEQ	98.1018	99.9813	0.609299	Netherlands	1982	Homo sapiens	NIPH 528	urine
GCF_000369265.1	PRJNA224116	SAMN01828146	Scaffold	REFSEQ	97.9898	100	0.273973	Czech Republic	1992	Homo sapiens	NIPH 67	Tracheal secretion
GCF_000369245.1	PRJNA224116	SAMN01828147	Scaffold	REFSEQ	97.8769	100	0.182648	Czech Republic	1993	Homo sapiens	NIPH 601	urine
GCF_000369225.1	PRJNA224116	SAMN01828148	Scaffold	REFSEQ	97.7889	100	0.136986	Czech Republic	1994	Homo sapiens	NIPH 329	Tracheal secretion
GCF_000369205.1	PRJNA224116	SAMN01828149	Scaffold	REFSEQ	97.8455	100	0.273973	Czech Republic	1994	Homo sapiens	NIPH 335	sputum
GCF_000369185.1	PRJNA224116	SAMN01828150	Scaffold	REFSEQ	97.8911	100	0.410959	Netherlands	1984	Homo sapiens	NIPH 527	urine
GCF_000369165.1	PRJNA224116	SAMN01828151	Scaffold	REFSEQ	98.0254	100	0	Czech Republic	1992	Homo sapiens	NIPH 201	nasal swab
GCF_000368525.1	PRJNA224116	SAMN01828165	Scaffold	REFSEQ	97.9653	100	0	Czech Republic	1993	Homo sapiens	NIPH 190	Tracheal secretion
GCF_000368245.1	PRJNA224116	SAMN01828174	Scaffold	REFSEQ	98.0678	100	0	Czech Republic	2001	Homo sapiens	NIPH 1734	sputum
GCF_000368225.1	PRJNA224116	SAMN01828175	Scaffold	REFSEQ	98.1138	99.9813	0.609299	Czech Republic	2003	Homo sapiens	NIPH 2061	I.V. Cannula
GCF_000368205.1	PRJNA224116	SAMN01828176	Scaffold	REFSEQ	97.9922	100	0	Czech Republic	1994	Homo sapiens	NIPH 615	Tracheal secretion
GCF_000368185.1	PRJNA224116	SAMN01828177	Scaffold	REFSEQ	97.8691	100	0	Czech Republic	1993	Homo sapiens	NIPH 146	wound
GCF_000368125.1	PRJNA224116	SAMN01828180	Scaffold	REFSEQ	98.0897	99.9813	0.718365	Czech Republic	2000	Homo sapiens	NIPH 1362	tracheal aspirate
GCF_000368105.1	PRJNA224116	SAMN01828181	Scaffold	REFSEQ	97.9408	100	0	Netherlands	1997	Homo sapiens	NIPH 1669	blood
GCF_000162295.1	PRJNA224116	SAMN02463741	Scaffold	REFSEQ	99.9904	99.0868	0	not determined	not determined	Homo sapiens	ATCC 19606	missing
GCF_000417805.2	PRJNA224116	SAMN02471176	Scaffold	REFSEQ	98.0684	100	0	Hong Kong	2008	Homo sapiens	AB-HKU3-08	sputum
GCF_000417785.2	PRJNA224116	SAMN02471179	Scaffold	REFSEQ	98.0887	99.0868	0	Hong Kong	2010	Homo sapiens	AB-HKU3-10	CSU
GCF_000692095.1	PRJNA224116	SAMN02581277	Scaffold	REFSEQ	98.1159	99.5876	0.609299	USA	2013	Homo sapiens	BIDMC 56	urine
GCF_000297915.1	PRJNA224116	SAMN02596915	Scaffold	REFSEQ	98.1155	99.5876	0.609299	-	-	-	Ab11111	-
GCF_000297935.1	PRJNA224116	SAMN02596917	Scaffold	REFSEQ	97.9832	100	1.16438	-	-	-	Ab33333	-
GCF_000297955.1	PRJNA224116	SAMN02596918	Scaffold	REFSEQ	98.1835	99.726	0	-	-	-	Ab44444	-
GCF_000623015.1	PRJNA224116	SAMN02628531	Scaffold	REFSEQ	97.8876	100	0.273973	USA	1997	Homo sapiens	LAC-4	missing
GCF_000623035.1	PRJNA224116	SAMN02628532	Scaffold	REFSEQ	97.8807	99.9087	0	Saudi Arabia	2011	Homo sapiens	R1B	missing
GCF_001936675.2	PRJNA224116	SAMN02727811	Scaffold	REFSEQ	97.9095	100	0	missing	missing	missing	DSM 30011	missing
GCF_000737145.1	PRJNA224116	SAMN02767370	Scaffold	REFSEQ	99.994	99.6347	0	unknown	unknown	-	ATCC 19606	unknown
GCF_000787335.1	PRJNA224116	SAMN02911269	Scaffold	REFSEQ	98.1006	99.9813	0.628046	China	2012	Homo sapiens	BJ7	sputum
GCF_000761465.1	PRJNA224116	SAMN02911795	Scaffold	REFSEQ	98.1234	99.5876	0.628046	Thailand	2010	Homo sapiens	T25	wound swab
GCF_000805295.1	PRJNA224116	SAMN03068183	Scaffold	REFSEQ	98.0808	99.9813	0.628046	China	2011	Homo sapiens	2011BJAB1	abdominal fluid
GCF_000805305.1	PRJNA224116	SAMN03068184	Scaffold	REFSEQ	98.0966	99.9813	0.628046	China	2011	Homo sapiens	2011BJAB2	sputum
GCF_000804635.1	PRJNA224116	SAMN03068186	Scaffold	REFSEQ	98.0234	99.8828	1.003	China	2011	Homo sapiens	2011BJAB3	sputum
GCF_000804665.1	PRJNA224116	SAMN03068188	Scaffold	REFSEQ	98.0631	99.9813	0.609299	China	2011	Homo sapiens	2011BJAB4	blood
GCF_000804975.1	PRJNA224116	SAMN03068189	Scaffold	REFSEQ	98.1049	99.9813	0.628046	China	2011	Homo sapiens	2011BJAB5	blood
GCF_000805275.1	PRJNA224116	SAMN03068190	Scaffold	REFSEQ	98.1067	99.9813	0.628046	China	2011	Homo sapiens	2011BJAB6	abdominal fluid
GCF_000804645.1	PRJNA224116	SAMN03068191	Scaffold	REFSEQ	98.0691	99.9813	0.96363	China	2011	Homo sapiens	2011BJAB7	sputum
GCF_000804985.1	PRJNA224116	SAMN03068192	Scaffold	REFSEQ	98.0971	99.9025	0.628046	China	2011	Homo sapiens	2011BJAB8	sputum
GCF_000805045.1	PRJNA224116	SAMN03068193	Scaffold	REFSEQ	97.9105	100	0	China	2011	Homo sapiens	2011BJAB9	sputum
GCF_000804655.1	PRJNA224116	SAMN03068194	Scaffold	REFSEQ	98.0532	99.9813	0.619939	China	2004	Homo sapiens	2004BJAB10	sputum
GCF_000805035.1	PRJNA224116	SAMN03068195	Scaffold	REFSEQ	98.0354	99.9156	0.806149	China	1999	Homo sapiens	1999BJAB11	sputum
GCF_000804735.1	PRJNA224116	SAMN03068196	Scaffold	REFSEQ	98.0389	99.9813	0.619939	China	2003	Homo sapiens	2003BJAB12	sputum
GCF_000804745.1	PRJNA224116	SAMN03068197	Scaffold	REFSEQ	98.0376	99.9813	0.226239	China	2004	Homo sapiens	2004BJAB13	sputum
GCF_000804715.1	PRJNA224116	SAMN03068198	Scaffold	REFSEQ	98.0085	99.9813	0.619939	China	2004	Homo sapiens	2004BJAB14	sputum
GCF_000805055.1	PRJNA224116	SAMN03068199	Scaffold	REFSEQ	98.0963	99.9813	0.628046	China	2011	Homo sapiens	2011GDAB1	sputum
GCF_000805065.1	PRJNA224116	SAMN03068241	Scaffold	REFSEQ	98.1511	100	0.273973	China	2011	Homo sapiens	2011GDAB2	abdominal fluid
GCF_000804725.1	PRJNA224116	SAMN03068243	Scaffold	REFSEQ	98.0939	99.9813	0.628046	China	2011	Homo sapiens	2011GDAB3	blood
GCF_000805115.1	PRJNA224116	SAMN03068244	Scaffold	REFSEQ	98.0818	99.9813	0.609299	China	2011	Homo sapiens	2011GDAB4	blood
GCF_000805125.1	PRJNA224116	SAMN03068246	Scaffold	REFSEQ	98.0954	99.9813	0.609299	China	2011	Homo sapiens	2011HNAB1	sputum
GCF_000804795.1	PRJNA224116	SAMN03068249	Scaffold	REFSEQ	98.092	99.5876	0.609299	China	2005	Homo sapiens	2005JSAB1	sputum
GCF_000805135.1	PRJNA224116	SAMN03068251	Scaffold	REFSEQ	97.8506	100	0	China	2011	Homo sapiens	2011TJAB1	blood
GCF_000804815.1	PRJNA224116	SAMN03068253	Scaffold	REFSEQ	98.089	99.5876	0.628046	China	2011	Homo sapiens	2011SHAB1	blood
GCF_000804805.1	PRJNA224116	SAMN03068256	Scaffold	REFSEQ	98.0764	99.8533	1.02612	China	2011	Homo sapiens	2011SDAB1	sputum
GCF_000804825.1	PRJNA224116	SAMN03068257	Scaffold	REFSEQ	98.098	99.9813	0.628046	China	2011	Homo sapiens	2011SDAB2	abdominal fluid
GCF_000804875.1	PRJNA224116	SAMN03068258	Scaffold	REFSEQ	98.0707	99.9813	0.982377	China	2011	Homo sapiens	2011SDAB3	blood
GCF_000804885.1	PRJNA224116	SAMN03068260	Scaffold	REFSEQ	98.0534	99.9813	0.215598	China	2011	Homo sapiens	2011LNAB1	sputum
GCF_000805145.1	PRJNA224116	SAMN03068261	Scaffold	REFSEQ	98.0857	99.9813	0.96363	China	2011	Homo sapiens	2011LNAB2	sputum
GCF_000805195.1	PRJNA224116	SAMN03068263	Scaffold	REFSEQ	98.0546	99.9813	0.96363	China	2011	Homo sapiens	2011LNAB3	blood
GCF_000804905.1	PRJNA224116	SAMN03068264	Scaffold	REFSEQ	98.1304	99.9813	0.609299	China	2005	Homo sapiens	2005LNAB4	sputum
GCF_000804895.1	PRJNA224116	SAMN03068266	Scaffold	REFSEQ	98.0514	99.9813	0.609299	China	2011	Homo sapiens	2011ZJAB1	sputum
GCF_000805205.1	PRJNA224116	SAMN03068267	Scaffold	REFSEQ	98.0528	99.5876	0.609299	China	2011	Homo sapiens	2011ZJAB2	abdominal fluid
GCF_000805225.1	PRJNA224116	SAMN03068268	Scaffold	REFSEQ	98.0863	99.9813	0.628046	China	2011	Homo sapiens	2011ZJAB3	blood
GCF_000805215.1	PRJNA224116	SAMN03068269	Scaffold	REFSEQ	97.7987	100	0	China	2011	Homo sapiens	2011ZJAB4	blood
GCF_000804955.1	PRJNA224116	SAMN03068270	Scaffold	REFSEQ	97.922	100	0	China	2004	Homo sapiens	2004ZJAB5	sputum
GCF_000804965.1	PRJNA224116	SAMN03068271	Scaffold	REFSEQ	97.9315	100	0	China	2004	Homo sapiens	2004ZJAB6	sputum
GCF_001612025.1	PRJNA224116	SAMN03078659	Scaffold	REFSEQ	97.9391	100	0.136986	USA	2003	Homo sapiens	AB967	blood
GCF_001611995.1	PRJNA224116	SAMN03078660	Scaffold	REFSEQ	97.8406	100	0.547945	USA	2006	Homo sapiens	AB2828	blood
GCF_001612005.1	PRJNA224116	SAMN03078661	Scaffold	REFSEQ	97.9729	100	0	USA	2006	Homo sapiens	AB3340	blood
GCF_001612015.1	PRJNA224116	SAMN03078662	Scaffold	REFSEQ	97.9081	100	0	USA	2006	Homo sapiens	AB3560	blood
GCF_001612095.1	PRJNA224116	SAMN03078663	Scaffold	REFSEQ	97.848	100	0.410959	USA	2007	Homo sapiens	AB3638	Severe Trauma Site
GCF_001612075.1	PRJNA224116	SAMN03078664	Scaffold	REFSEQ	98.1	99.9813	0.609299	USA	2007	Homo sapiens	AB3785	blood
GCF_001612105.1	PRJNA224116	SAMN03078665	Scaffold	REFSEQ	97.8488	100	0.410959	USA	2007	Homo sapiens	AB3806	Severe Trauma Site
GCF_001612115.1	PRJNA224116	SAMN03078666	Scaffold	REFSEQ	97.881	100	0	USA	2007	Homo sapiens	AB3927	Severe Trauma Site
GCF_001612185.1	PRJNA224116	SAMN03078667	Scaffold	REFSEQ	98.1075	99.9813	0.609299	USA	2007	Homo sapiens	AB4025	wound
GCF_001612155.1	PRJNA224116	SAMN03078668	Scaffold	REFSEQ	98.1116	99.9813	0.609299	USA	2007	Homo sapiens	AB4026	wound
GCF_001612175.1	PRJNA224116	SAMN03078669	Scaffold	REFSEQ	98.1121	99.9813	0.609299	USA	2007	Homo sapiens	AB4027	wound
GCF_001612235.1	PRJNA224116	SAMN03078670	Scaffold	REFSEQ	98.1307	99.5876	1.57293	USA	2007	Homo sapiens	AB4052	warwound (surv)
GCF_001612255.1	PRJNA224116	SAMN03078672	Scaffold	REFSEQ	97.8948	100	0.136986	USA	2007	Homo sapiens	AB4448	warwound (surv)
GCF_001612215.1	PRJNA224116	SAMN03078673	Scaffold	REFSEQ	97.9141	100	0	USA	2007	Homo sapiens	AB4456	Trach aspirate
GCF_001612275.1	PRJNA224116	SAMN03078674	Scaffold	REFSEQ	97.889	100	0	USA	2008	Homo sapiens	AB4490	warwound (surv)
GCF_001612285.1	PRJNA224116	SAMN03078675	Scaffold	REFSEQ	98.1203	99.9813	0.609299	USA	2008	Homo sapiens	AB4498	blood
GCF_001612315.1	PRJNA224116	SAMN03078676	Scaffold	REFSEQ	98.0953	99.9813	0.665542	USA	2008	Homo sapiens	AB4795	Severe Trauma Site bone
GCF_001612335.1	PRJNA224116	SAMN03078677	Scaffold	REFSEQ	98.1345	99.5876	0.609299	USA	2008	Homo sapiens	AB4878	warwound (surv)
GCF_001612365.1	PRJNA224116	SAMN03078678	Scaffold	REFSEQ	98.123	99.5876	0.609299	USA	2008	Homo sapiens	AB4932	sputum
GCF_001612355.1	PRJNA224116	SAMN03078679	Scaffold	REFSEQ	98.1324	99.5876	0.609299	USA	2008	Homo sapiens	AB4957	Severe Trauma Site
GCF_001612415.1	PRJNA224116	SAMN03078680	Scaffold	REFSEQ	97.886	100	0	USA	2008	Homo sapiens	AB4991	warwound (surv)
GCF_001612395.1	PRJNA224116	SAMN03078681	Scaffold	REFSEQ	98.1454	99.5876	0.609299	USA	2008	Homo sapiens	AB5001	blood
GCF_001612455.1	PRJNA224116	SAMN03078682	Scaffold	REFSEQ	97.8998	100	0.136986	USA	2008	Homo sapiens	AB5197	Severe Trauma Site
GCF_001612435.1	PRJNA224116	SAMN03078683	Scaffold	REFSEQ	97.8967	100	0	USA	2009	Homo sapiens	AB5674	blood
GCF_000802895.1	PRJNA224116	SAMN03080628	Scaffold	REFSEQ	98.1125	99.9813	0.652653	Thailand	2010	Homo sapiens	T122	-
GCF_000802885.1	PRJNA224116	SAMN03080630	Scaffold	REFSEQ	98.1279	99.9813	0.628046	Thailand	2010	Homo sapiens	T173	-
GCF_000802915.1	PRJNA224116	SAMN03080633	Scaffold	REFSEQ	97.8949	99.9087	0.547945	Thailand	2010	Homo sapiens	T214	-
GCF_000876445.1	PRJNA224116	SAMN03175026	Scaffold	REFSEQ	97.9854	100	0.0456621	Puerto Rico	2009	Homo sapiens	M3AC9-7	blood from a female with septicemia
GCF_001052775.1	PRJNA224116	SAMN03197109	Scaffold	REFSEQ	98.117	99.9813	0.609299	USA	Unknown	Homo sapiens	1153_ABAU	missing
GCF_001055965.1	PRJNA224116	SAMN03197411	Scaffold	REFSEQ	97.8778	100	0	USA	Unknown	Homo sapiens	219_ABAU	missing
GCF_000966495.1	PRJNA224116	SAMN03418024	Scaffold	REFSEQ	98.0423	99.9813	0.609299	Japan	2010	-	J65	-
GCF_000966525.1	PRJNA224116	SAMN03418025	Scaffold	REFSEQ	98.0791	99.9813	0.609299	Japan	2010	-	J133	-
GCF_000981405.1	PRJNA224116	SAMN03453211	Scaffold	REFSEQ	98.0961	99.9813	0.847591	not applicable	not applicable	Homo sapiens	Ab1	hospital environment
GCF_031631215.1	PRJNA224116	SAMN03470724	Scaffold	REFSEQ	98.1163	99.9813	4.47927	USA	2007	Homo sapiens	ACIN00005	not collected
GCF_031631175.1	PRJNA224116	SAMN03470726	Scaffold	REFSEQ	98.0942	99.9813	2.4107	USA	2007	Homo sapiens	ACIN00004	not collected
GCF_031631255.1	PRJNA224116	SAMN03470727	Scaffold	REFSEQ	98.1093	99.9813	4.49697	USA	2007	Homo sapiens	ACIN00009	not collected
GCF_031501035.1	PRJNA224116	SAMN03470728	Scaffold	REFSEQ	98.091	99.9813	1.99644	USA	2007	Homo sapiens	ACIN00012	not collected
GCF_031501005.1	PRJNA224116	SAMN03470729	Scaffold	REFSEQ	98.0933	99.9813	2.40626	USA	2007	Homo sapiens	ACIN00010	not collected
GCF_031500795.1	PRJNA224116	SAMN03470730	Scaffold	REFSEQ	98.1151	99.9677	2.20258	USA	2007	Homo sapiens	ACIN00014	not collected
GCF_031500785.1	PRJNA224116	SAMN03470731	Scaffold	REFSEQ	98.1301	99.5876	3.95278	USA	2007	Homo sapiens	ACIN00015	not collected
GCF_031500895.1	PRJNA224116	SAMN03470732	Scaffold	REFSEQ	98.0818	99.5876	2.57418	USA	2007	Homo sapiens	ACIN00011	not collected
GCF_031501115.1	PRJNA224116	SAMN03470733	Scaffold	REFSEQ	98.1007	99.5876	2.12099	USA	2007	Homo sapiens	ACIN00019	not collected
GCF_031501205.1	PRJNA224116	SAMN03470734	Scaffold	REFSEQ	98.1165	99.5876	2.79793	USA	2007	Homo sapiens	ACIN00018	not collected
GCF_031500875.1	PRJNA224116	SAMN03470735	Scaffold	REFSEQ	97.9987	100	1.42694	USA	2007	Homo sapiens	ACIN00017	not collected
GCF_031501545.1	PRJNA224116	SAMN03470738	Scaffold	REFSEQ	98.1391	99.4891	4.25719	USA	2007	Homo sapiens	ACIN00020	not collected
GCF_031501595.1	PRJNA224116	SAMN03470739	Scaffold	REFSEQ	98.1047	99.5876	2.52531	USA	2007	Homo sapiens	ACIN00023	not collected
GCF_031501525.1	PRJNA224116	SAMN03470741	Scaffold	REFSEQ	98.0966	99.9813	2.94723	USA	2008	Homo sapiens	ACIN00026	not collected
GCF_031501345.1	PRJNA224116	SAMN03470742	Scaffold	REFSEQ	98.1112	99.9813	4.86628	USA	2008	Homo sapiens	ACIN00028	not collected
GCF_031501375.1	PRJNA224116	SAMN03470743	Scaffold	REFSEQ	98.1197	99.9813	3.81839	USA	2008	Homo sapiens	ACIN00029	not collected
GCF_031501465.1	PRJNA224116	SAMN03470744	Scaffold	REFSEQ	98.0948	99.9813	3.33313	USA	2008	Homo sapiens	ACIN00025	not collected
GCF_031501725.1	PRJNA224116	SAMN03470745	Scaffold	REFSEQ	98.1079	99.9813	1.96895	USA	2008	Homo sapiens	ACIN00042	not collected
GCF_031501745.1	PRJNA224116	SAMN03470746	Scaffold	REFSEQ	98.1009	99.9813	3.3564	USA	2008	Homo sapiens	ACIN00043	not collected
GCF_031501785.1	PRJNA224116	SAMN03470747	Scaffold	REFSEQ	98.0186	99.9375	2.77606	USA	2008	Homo sapiens	ACIN00044	not collected
GCF_031501795.1	PRJNA224116	SAMN03470748	Scaffold	REFSEQ	98.0514	99.9813	2.54875	USA	2008	Homo sapiens	ACIN00045	not collected
GCF_031501825.1	PRJNA224116	SAMN03470749	Scaffold	REFSEQ	98.108	99.9813	3.05458	USA	2009	Homo sapiens	ACIN00046	not collected
GCF_031631075.1	PRJNA224116	SAMN03470750	Scaffold	REFSEQ	98.1018	99.9813	3.29933	USA	2009	Homo sapiens	ACIN00049	not collected
GCF_031501245.1	PRJNA224116	SAMN03470751	Scaffold	REFSEQ	98.1045	99.9813	3.99879	USA	2009	Homo sapiens	ACIN00054	not collected
GCF_031631195.1	PRJNA224116	SAMN03470752	Scaffold	REFSEQ	98.0538	99.9813	3.62413	USA	2009	Homo sapiens	ACIN00047	not collected
GCF_031631115.1	PRJNA224116	SAMN03470753	Scaffold	REFSEQ	98.1076	99.9813	3.46939	USA	2009	Homo sapiens	ACIN00055	not collected
GCF_031501045.1	PRJNA224116	SAMN03470754	Scaffold	REFSEQ	98.1026	99.9813	2.09031	USA	2009	Homo sapiens	ACIN00050	not collected
GCF_031631095.1	PRJNA224116	SAMN03470756	Scaffold	REFSEQ	98.1065	99.9813	3.29875	USA	2009	Homo sapiens	ACIN00051	not collected
GCF_031501105.1	PRJNA224116	SAMN03470757	Scaffold	REFSEQ	98.0621	99.9813	4.23231	USA	2009	Homo sapiens	ACIN00053	not collected
GCF_031501425.1	PRJNA224116	SAMN03470758	Scaffold	REFSEQ	98.1594	99.9813	2.61552	USA	2012	Homo sapiens	ACIN00132	not collected
GCF_031501285.1	PRJNA224116	SAMN03470759	Scaffold	REFSEQ	98.1577	99.9813	2.48052	USA	2012	Homo sapiens	ACIN00133	not collected
GCF_031500675.1	PRJNA224116	SAMN03470760	Scaffold	REFSEQ	98.1555	99.9813	2.53171	USA	2012	Homo sapiens	ACIN00136	not collected
GCF_001672535.1	PRJNA224116	SAMN03699770	Scaffold	REFSEQ	98.0634	99.9813	1.27484	Puerto Rico	2014	Homo sapiens	M3AC14-8	skin
GCF_003352485.1	PRJNA224116	SAMN03765510	Scaffold	REFSEQ	98.0998	99.9813	0.628046	Taiwan	2010	Homo sapiens	ISAB51	blood
GCF_003352495.1	PRJNA224116	SAMN03765511	Scaffold	REFSEQ	98.0888	99.5876	0.832385	Taiwan	2012	Homo sapiens	KMDRAB15	blood
GCF_003352525.1	PRJNA224116	SAMN03765513	Scaffold	REFSEQ	98.0937	99.5876	1.02978	Taiwan	2013	Homo sapiens	KSPU17	sputum
GCF_003352535.1	PRJNA224116	SAMN03765514	Scaffold	REFSEQ	98.0794	99.5876	1.63077	Taiwan	2013	Homo sapiens	KSPU8	sputum
GCF_003352595.1	PRJNA224116	SAMN03765515	Scaffold	REFSEQ	98.0595	99.3196	0.698075	Taiwan	2010	Homo sapiens	MDRAB16	blood
GCF_003352725.1	PRJNA224116	SAMN03765516	Scaffold	REFSEQ	98.1082	99.9025	1.29933	Taiwan	2010	Homo sapiens	MDRAB19	blood
GCF_003352615.1	PRJNA224116	SAMN03765517	Scaffold	REFSEQ	98.091	99.9813	0.234346	Taiwan	2009	Homo sapiens	MDRAB41	blood
GCF_003352605.1	PRJNA224116	SAMN03765518	Scaffold	REFSEQ	98.104	99.9813	0.609299	Taiwan	2009	Homo sapiens	MDRAB55	blood
GCF_003352675.1	PRJNA224116	SAMN03765519	Scaffold	REFSEQ	98.0798	99.9813	0.628046	Taiwan	2009	Homo sapiens	MDRAB58	blood
GCF_003352735.1	PRJNA224116	SAMN03765520	Scaffold	REFSEQ	98.0529	99.7461	0.628046	Taiwan	2010	Homo sapiens	MDRAB7	blood
GCF_003352665.1	PRJNA224116	SAMN03765521	Scaffold	REFSEQ	98.0961	99.1939	0.26463	Taiwan	2009	Homo sapiens	SPU6	sputum
GCF_003352685.1	PRJNA224116	SAMN03765522	Scaffold	REFSEQ	98.0598	99.896	0.632458	Taiwan	2009	Homo sapiens	SPU7	sputum
GCF_001541875.1	PRJNA224116	SAMN04005085	Scaffold	REFSEQ	98.1126	99.9156	0.609299	Spain	2011	Homo sapiens	AbMDR-GLH1	Tracheobronchial aspirate
GCF_001541455.1	PRJNA224116	SAMN04005086	Scaffold	REFSEQ	98.1026	99.9813	1.43607	Spain	2011	Homo sapiens	AbMDR-GLH2	Tracheobronchial aspirate
GCF_001541425.1	PRJNA224116	SAMN04005087	Scaffold	REFSEQ	98.1143	99.9156	0.609299	Spain	2011	Homo sapiens	AbMDR-GLH3	Tracheobronchial aspirate
GCF_001541775.1	PRJNA224116	SAMN04005088	Scaffold	REFSEQ	98.1095	99.9813	0.609299	Spain	2011	Homo sapiens	AbMDR-GLH4	Tracheobronchial aspirate
GCF_001541525.1	PRJNA224116	SAMN04005089	Scaffold	REFSEQ	98.1136	100	0	Spain	2011	Homo sapiens	AbMDR-GLH5	Tracheobronchial aspirate
GCF_001541695.1	PRJNA224116	SAMN04005090	Scaffold	REFSEQ	98.1144	100	0	Spain	2011	Homo sapiens	AbMDR-GLH6	Tracheobronchial aspirate
GCF_001541685.1	PRJNA224116	SAMN04005091	Scaffold	REFSEQ	98.1068	99.9087	0	Spain	2011	Homo sapiens	AbMDR-GLH7	Tracheobronchial aspirate
GCF_001541705.1	PRJNA224116	SAMN04005092	Scaffold	REFSEQ	98.1153	99.5219	0.609299	Spain	2011	Homo sapiens	AbMDR-GLH8	Tracheobronchial aspirate
GCF_001541725.1	PRJNA224116	SAMN04005093	Scaffold	REFSEQ	98.1045	99.1282	0.784277	Spain	2011	Homo sapiens	AbMDR-GLH9	Tracheobronchial aspirate
GCF_001541765.1	PRJNA224116	SAMN04005094	Scaffold	REFSEQ	98.1037	99.5876	0.609299	Spain	2011	Homo sapiens	AbMDR-GLH10	Tracheobronchial aspirate
GCF_001541795.1	PRJNA224116	SAMN04005095	Scaffold	REFSEQ	98.1116	99.5219	1.47982	Spain	2011	Homo sapiens	AbMDR-GLH11	Tracheobronchial aspirate
GCF_001707985.1	PRJNA224116	SAMN04038510	Scaffold	REFSEQ	98.0718	100	0	Spain	2010	Homo sapiens	ST-2_clon_2010	clinical sample
GCF_001420515.1	PRJNA224116	SAMN04054216	Scaffold	REFSEQ	98.093	99.9813	0.609299	United Kingdom	2011	Homo sapiens	Ab Crete	sputum
GCF_001420505.1	PRJNA224116	SAMN04054373	Scaffold	REFSEQ	98.1074	99.5876	0.609299	South Africa	-	Homo sapiens	A186	-
GCF_001432275.1	PRJNA224116	SAMN04089926	Scaffold	REFSEQ	97.8345	99.726	0.684932	Lebanon	2012	Homo sapiens	ACMH-6201	-
GCF_001617825.1	PRJNA224116	SAMN04376868	Scaffold	REFSEQ	98.1057	99.9813	0.609299	China	2014	Homo sapiens	2015ZJAB1	sputum
GCF_001617885.1	PRJNA224116	SAMN04376869	Scaffold	REFSEQ	98.0989	99.9813	0.609299	China	2014	Homo sapiens	2015ZJAB2	sputum
GCF_001617835.1	PRJNA224116	SAMN04376870	Scaffold	REFSEQ	98.0895	99.9813	0.609299	China	2014	Homo sapiens	2015ZJAB3	sputum
GCF_001617915.1	PRJNA224116	SAMN04376872	Scaffold	REFSEQ	98.1201	99.5876	0.628046	China	2013	Homo sapiens	2015ZJAB7	drain fluid
GCF_001617945.1	PRJNA224116	SAMN04376873	Scaffold	REFSEQ	98.1152	99.5876	0.628046	China	2014	Homo sapiens	2015ZJAB8	drain fluid
GCF_001549575.1	PRJNA224116	SAMN04407353	Scaffold	REFSEQ	97.9316	100	0	Mexico	2011	Homo sapiens	MEX11594	Pleural fluid
GCF_001648035.1	PRJNA224116	SAMN04521099	Scaffold	REFSEQ	97.8826	100	0	Estonia	-	Homo sapiens	A457	-
GCF_001863335.1	PRJNA224116	SAMN04745386	Scaffold	REFSEQ	98.1192	99.5876	1.08602	China	2014	Homo sapiens	XH506	sputum
GCF_001863405.1	PRJNA224116	SAMN04745387	Scaffold	REFSEQ	98.1051	99.9156	0.802729	China	2014	Homo sapiens	XH507	sputum
GCF_001863345.1	PRJNA224116	SAMN04745388	Scaffold	REFSEQ	98.1042	99.5876	0.636081	China	2014	Homo sapiens	XH508	sputum
GCF_001863395.1	PRJNA224116	SAMN04745389	Scaffold	REFSEQ	98.1093	99.0655	0.628046	China	2014	Homo sapiens	XH509	sputum
GCF_001863475.1	PRJNA224116	SAMN04745390	Scaffold	REFSEQ	98.1361	99.5876	0.628046	China	2014	Homo sapiens	XH510	sputum
GCF_001863555.1	PRJNA224116	SAMN04745391	Scaffold	REFSEQ	98.093	99.9813	0.800205	China	2014	Homo sapiens	XH511	sputum
GCF_001863415.1	PRJNA224116	SAMN04745392	Scaffold	REFSEQ	98.0223	100	0	China	2014	Homo sapiens	XH512	sputum
GCF_001863575.1	PRJNA224116	SAMN04745393	Scaffold	REFSEQ	98.1124	99.5876	0.706787	China	2014	Homo sapiens	XH513	sputum
GCF_001863455.1	PRJNA224116	SAMN04745394	Scaffold	REFSEQ	98.1319	99.9813	0.628046	China	2014	Homo sapiens	XH514	sputum
GCF_001863465.1	PRJNA224116	SAMN04745395	Scaffold	REFSEQ	98.1153	99.5876	0.628046	China	2014	Homo sapiens	XH515	sputum
GCF_001863485.1	PRJNA224116	SAMN04745396	Scaffold	REFSEQ	98.0213	100	0	China	2014	Homo sapiens	XH545	sputum
GCF_001863615.1	PRJNA224116	SAMN04745397	Scaffold	REFSEQ	98.1039	99.5876	0.628046	China	2014	Homo sapiens	XH546	sputum
GCF_001863625.1	PRJNA224116	SAMN04745398	Scaffold	REFSEQ	98.1069	99.9813	0.628046	China	2014	Homo sapiens	XH547	sputum
GCF_001863535.1	PRJNA224116	SAMN04745399	Scaffold	REFSEQ	98.1136	99.5876	0.628046	China	2014	Homo sapiens	XH548	sputum
GCF_001863545.1	PRJNA224116	SAMN04745400	Scaffold	REFSEQ	98.108	99.9813	0.628046	China	2014	Homo sapiens	XH549	sputum
GCF_001864015.1	PRJNA224116	SAMN04745401	Scaffold	REFSEQ	98.1082	99.9813	0.628046	China	2014	Homo sapiens	XH550	sputum
GCF_001863665.1	PRJNA224116	SAMN04745403	Scaffold	REFSEQ	98.1026	99.5876	0.628046	China	2014	Homo sapiens	XH552	sputum
GCF_001863725.1	PRJNA224116	SAMN04745404	Scaffold	REFSEQ	98.0569	100	0.00856164	China	2014	Homo sapiens	XH553	sputum
GCF_001863695.1	PRJNA224116	SAMN04745405	Scaffold	REFSEQ	98.1018	99.8938	0.693663	China	2014	Homo sapiens	XH554	sputum
GCF_001864035.1	PRJNA224116	SAMN04745406	Scaffold	REFSEQ	98.126	99.9813	0.628046	China	2015	Homo sapiens	XH595	sputum
GCF_001864045.1	PRJNA224116	SAMN04745407	Scaffold	REFSEQ	98.086	99.9813	0.628046	China	2015	Homo sapiens	XH606	sputum
GCF_001863705.1	PRJNA224116	SAMN04745408	Scaffold	REFSEQ	97.9417	100	2.28311	China	2014	Homo sapiens	XH639	sputum
GCF_001864065.1	PRJNA224116	SAMN04745409	Scaffold	REFSEQ	98.1068	99.9813	0.609299	China	2014	Homo sapiens	XH640	sputum
GCF_001864095.1	PRJNA224116	SAMN04745411	Scaffold	REFSEQ	98.0608	100	0	China	2015	Homo sapiens	XH642	sputum
GCF_001863775.1	PRJNA224116	SAMN04745412	Scaffold	REFSEQ	98.0944	99.9025	0.628046	China	2014	Homo sapiens	XH643	sputum
GCF_001864125.1	PRJNA224116	SAMN04745413	Scaffold	REFSEQ	98.0772	99.9813	0.95613	China	2014	Homo sapiens	XH644	sputum
GCF_001863785.1	PRJNA224116	SAMN04745414	Scaffold	REFSEQ	97.92	100	0.273973	China	2014	Homo sapiens	XH645	sputum
GCF_001864115.1	PRJNA224116	SAMN04745415	Scaffold	REFSEQ	98.1006	99.5876	0.609299	China	2014	Homo sapiens	XH646	sputum
GCF_001864155.1	PRJNA224116	SAMN04745416	Scaffold	REFSEQ	98.0348	100	0	China	2014	Homo sapiens	XH647	sputum
GCF_001864165.1	PRJNA224116	SAMN04745417	Scaffold	REFSEQ	98.0615	100	0	China	2014	Homo sapiens	XH648	sputum
GCF_001863815.1	PRJNA224116	SAMN04745418	Scaffold	REFSEQ	98.1129	99.9813	0.609299	China	2014	Homo sapiens	XH649	sputum
GCF_001864195.1	PRJNA224116	SAMN04745419	Scaffold	REFSEQ	98.1154	99.9813	0.628046	China	2014	Homo sapiens	XH650	sputum
GCF_001864235.1	PRJNA224116	SAMN04745422	Scaffold	REFSEQ	98.0596	100	0	China	2014	Homo sapiens	XH661	sputum
GCF_001864285.1	PRJNA224116	SAMN04745424	Scaffold	REFSEQ	98.0833	99.9813	0.609299	China	2015	Homo sapiens	XH663	sputum
GCF_001863835.1	PRJNA224116	SAMN04745425	Scaffold	REFSEQ	98.0624	100	0	China	2015	Homo sapiens	XH664	sputum
GCF_001864305.1	PRJNA224116	SAMN04745426	Scaffold	REFSEQ	98.1323	99.9813	0.628046	China	2015	Homo sapiens	XH665	sputum
GCF_001864315.1	PRJNA224116	SAMN04745427	Scaffold	REFSEQ	98.1265	99.9813	0.628046	China	2015	Homo sapiens	XH666	sputum
GCF_001863865.1	PRJNA224116	SAMN04745428	Scaffold	REFSEQ	98.0942	99.5876	0.609299	China	2015	Homo sapiens	XH667	sputum
GCF_001864355.1	PRJNA224116	SAMN04745429	Scaffold	REFSEQ	98.0644	100	0	China	2015	Homo sapiens	XH668	sputum
GCF_001864385.1	PRJNA224116	SAMN04745430	Scaffold	REFSEQ	98.0873	99.9813	0.609299	China	2015	Homo sapiens	XH669	sputum
GCF_001864375.1	PRJNA224116	SAMN04745431	Scaffold	REFSEQ	98.0847	99.5876	0.609299	China	2015	Homo sapiens	XH670	sputum
GCF_001863855.1	PRJNA224116	SAMN04745432	Scaffold	REFSEQ	98.0948	99.9813	0.609299	China	2015	Homo sapiens	XH671	sputum
GCF_001864395.1	PRJNA224116	SAMN04745433	Scaffold	REFSEQ	98.0958	99.9813	0.609299	China	2015	Homo sapiens	XH672	sputum
GCF_001864435.1	PRJNA224116	SAMN04745434	Scaffold	REFSEQ	98.066	100	0	China	2015	Homo sapiens	XH673	sputum
GCF_001864465.1	PRJNA224116	SAMN04745435	Scaffold	REFSEQ	98.065	100	0	China	2015	Homo sapiens	XH674	sputum
GCF_001863875.1	PRJNA224116	SAMN04745436	Scaffold	REFSEQ	98.0854	99.9813	3.16021	China	2014	Homo sapiens	XH608	sputum
GCF_001864475.1	PRJNA224116	SAMN04745438	Scaffold	REFSEQ	98.1085	99.9813	0.628046	China	2015	Homo sapiens	XH851	sputum
GCF_001863905.1	PRJNA224116	SAMN04745441	Scaffold	REFSEQ	98.1409	98.8986	0.636081	China	2012	Homo sapiens	XH680	sputum
GCF_001864575.1	PRJNA224116	SAMN04745442	Scaffold	REFSEQ	97.9627	100	0	China	2013	Homo sapiens	XH681	sputum
GCF_001863935.1	PRJNA224116	SAMN04745443	Scaffold	REFSEQ	98.1375	99.9813	0.628046	China	2014	Homo sapiens	XH682	sputum
GCF_001864555.1	PRJNA224116	SAMN04745444	Scaffold	REFSEQ	97.9331	99.9813	0.682727	China	2012	Homo sapiens	XH683	sputum
GCF_001864565.1	PRJNA224116	SAMN04745445	Scaffold	REFSEQ	98.1107	99.9813	0.628046	China	2012	Homo sapiens	XH684	sputum
GCF_001864615.1	PRJNA224116	SAMN04745446	Scaffold	REFSEQ	98.1029	99.9813	0.609299	China	2014	Homo sapiens	XH685	sputum
GCF_001864655.1	PRJNA224116	SAMN04745449	Scaffold	REFSEQ	98.094	98.9314	0.609299	China	2013	Homo sapiens	XH688	sputum
GCF_001864675.1	PRJNA224116	SAMN04745450	Scaffold	REFSEQ	98.0866	99.9813	0.609299	China	2014	Homo sapiens	XH689	sputum
GCF_001864715.1	PRJNA224116	SAMN04745452	Scaffold	REFSEQ	97.8421	99.726	0.273973	China	2014	Homo sapiens	XH693	sputum
GCF_001864745.1	PRJNA224116	SAMN04745454	Scaffold	REFSEQ	98.0958	98.4064	0.628046	China	2013	Homo sapiens	XH697	sputum
GCF_001864755.1	PRJNA224116	SAMN04745455	Scaffold	REFSEQ	98.1071	99.9813	0.609299	China	2013	Homo sapiens	XH698	sputum
GCF_001864795.1	PRJNA224116	SAMN04745456	Scaffold	REFSEQ	98.1223	99.9813	0.628046	China	2014	Homo sapiens	XH701	sputum
GCF_001862005.1	PRJNA224116	SAMN04745458	Scaffold	REFSEQ	98.0339	98.6301	0	China	2013	Homo sapiens	XH703	sputum
GCF_001861995.1	PRJNA224116	SAMN04745459	Scaffold	REFSEQ	98.1436	99.9813	0.628046	China	2014	Homo sapiens	XH704	sputum
GCF_001863955.1	PRJNA224116	SAMN04745461	Scaffold	REFSEQ	98.1018	99.9813	0.609299	China	2014	Homo sapiens	XH706	sputum
GCF_001863965.1	PRJNA224116	SAMN04745462	Scaffold	REFSEQ	98.0882	99.9813	0.609299	China	2014	Homo sapiens	XH707	sputum
GCF_001862065.1	PRJNA224116	SAMN04745464	Scaffold	REFSEQ	98.0779	98.7587	0.234346	China	2012	Homo sapiens	XH709	sputum
GCF_001862105.1	PRJNA224116	SAMN04745466	Scaffold	REFSEQ	98.1049	98.4064	0.628046	China	2013	Homo sapiens	XH713	sputum
GCF_001862135.1	PRJNA224116	SAMN04745467	Scaffold	REFSEQ	98.0921	98.6112	0.628046	China	2013	Homo sapiens	XH714	sputum
GCF_001862225.1	PRJNA224116	SAMN04745471	Scaffold	REFSEQ	98.1166	99.9813	0.609299	China	2014	Homo sapiens	XH719	sputum
GCF_001862235.1	PRJNA224116	SAMN04745473	Scaffold	REFSEQ	98.1365	99.9813	0.628046	China	2014	Homo sapiens	XH721	sputum
GCF_001862265.1	PRJNA224116	SAMN04745474	Scaffold	REFSEQ	98.1251	97.2253	0.609299	China	2013	Homo sapiens	XH722	sputum
GCF_001862295.1	PRJNA224116	SAMN04745475	Scaffold	REFSEQ	98.1109	99.9813	0.806149	China	2013	Homo sapiens	XH723	sputum
GCF_001861385.2	PRJNA224116	SAMN04745478	Scaffold	REFSEQ	98.1121	99.5876	0.628046	China	2013	Homo sapiens	XH727	sputum
GCF_001861435.1	PRJNA224116	SAMN04745479	Scaffold	REFSEQ	98.1067	99.5876	0.660855	China	2014	Homo sapiens	XH728	sputum
GCF_001862335.1	PRJNA224116	SAMN04745481	Scaffold	REFSEQ	98.0315	100	0	China	2014	Homo sapiens	XH730	sputum
GCF_001862375.1	PRJNA224116	SAMN04745483	Scaffold	REFSEQ	98.1321	98.4064	0.628046	China	2014	Homo sapiens	XH732	sputum
GCF_001862385.1	PRJNA224116	SAMN04745484	Scaffold	REFSEQ	98.0677	99.9813	0.619939	China	2013	Homo sapiens	XH733	sputum
GCF_001862395.1	PRJNA224116	SAMN04745485	Scaffold	REFSEQ	98.0788	99.9605	0.652653	China	2013	Homo sapiens	XH735	sputum
GCF_001862425.1	PRJNA224116	SAMN04745486	Scaffold	REFSEQ	98.175	96.8316	0.75928	China	2013	Homo sapiens	XH736	sputum
GCF_001861475.2	PRJNA224116	SAMN04745487	Scaffold	REFSEQ	98.1326	99.9813	0.671791	China	2014	Homo sapiens	XH737	sputum
GCF_001862455.1	PRJNA224116	SAMN04745488	Scaffold	REFSEQ	98.1381	99.9813	1.02175	China	2013	Homo sapiens	XH738	sputum
GCF_001862475.2	PRJNA224116	SAMN04745489	Scaffold	REFSEQ	98.1378	99.9813	0.649919	China	2013	Homo sapiens	XH739	sputum
GCF_001862505.1	PRJNA224116	SAMN04745491	Scaffold	REFSEQ	98.1378	99.9813	0.628046	China	2014	Homo sapiens	XH741	sputum
GCF_001861465.1	PRJNA224116	SAMN04745492	Scaffold	REFSEQ	98.1369	99.9813	0.641622	China	2014	Homo sapiens	XH742	sputum
GCF_001861535.1	PRJNA224116	SAMN04745494	Scaffold	REFSEQ	98.1425	99.9813	0.628046	China	2014	Homo sapiens	XH744	sputum
GCF_001862485.1	PRJNA224116	SAMN04745495	Scaffold	REFSEQ	98.1391	99.9813	0.628046	China	2015	Homo sapiens	XH745	sputum
GCF_001862535.1	PRJNA224116	SAMN04745496	Scaffold	REFSEQ	98.0751	99.9813	0.861907	China	2013	Homo sapiens	XH746	sputum
GCF_001861545.1	PRJNA224116	SAMN04745497	Scaffold	REFSEQ	98.0628	99.9813	0.642107	China	2013	Homo sapiens	XH747	sputum
GCF_001862555.1	PRJNA224116	SAMN04745498	Scaffold	REFSEQ	98.1044	98.7587	0.307997	China	2013	Homo sapiens	XH748	sputum
GCF_001862565.1	PRJNA224116	SAMN04745500	Scaffold	REFSEQ	98.1437	99.9813	0.903637	China	2012	Homo sapiens	XH750	sputum
GCF_001862615.1	PRJNA224116	SAMN04745502	Scaffold	REFSEQ	98.133	99.9813	0.636081	China	2014	Homo sapiens	XH752	sputum
GCF_001861585.1	PRJNA224116	SAMN04745503	Scaffold	REFSEQ	98.132	99.9813	0.628046	China	2014	Homo sapiens	XH753	sputum
GCF_001862645.1	PRJNA224116	SAMN04745505	Scaffold	REFSEQ	98.1415	99.9813	0.739595	China	2011	Homo sapiens	XH755	sputum
GCF_001862665.1	PRJNA224116	SAMN04745506	Scaffold	REFSEQ	98.0807	99.5876	0.936445	China	2014	Homo sapiens	XH756	sputum
GCF_001861615.1	PRJNA224116	SAMN04745507	Scaffold	REFSEQ	98.1134	96.8316	0.628046	China	2014	Homo sapiens	XH757	sputum
GCF_001862715.1	PRJNA224116	SAMN04745509	Scaffold	REFSEQ	98.1367	99.9813	0.693663	China	2014	Homo sapiens	XH763	sputum
GCF_001862735.1	PRJNA224116	SAMN04745512	Scaffold	REFSEQ	98.088	99.9813	0.628046	China	2014	Homo sapiens	XH766	sputum
GCF_001861655.1	PRJNA224116	SAMN04745513	Scaffold	REFSEQ	98.0523	99.9813	0.681576	China	2014	Homo sapiens	XH767	sputum
GCF_001862795.1	PRJNA224116	SAMN04745515	Scaffold	REFSEQ	97.9269	97.8815	0.682727	China	2014	Homo sapiens	XH769	sputum
GCF_001861665.1	PRJNA224116	SAMN04745516	Scaffold	REFSEQ	98.071	98.4064	0.609299	China	2012	Homo sapiens	XH770	sputum
GCF_001862825.1	PRJNA224116	SAMN04745518	Scaffold	REFSEQ	98.0995	99.9813	0.753656	China	2012	Homo sapiens	XH778	sputum
GCF_001862855.1	PRJNA224116	SAMN04745519	Scaffold	REFSEQ	98.137	99.9813	0.628046	China	2013	Homo sapiens	XH779	sputum
GCF_001862875.1	PRJNA224116	SAMN04745520	Scaffold	REFSEQ	98.137	99.9813	0.628046	China	2014	Homo sapiens	XH786	sputum
GCF_001862885.1	PRJNA224116	SAMN04745521	Scaffold	REFSEQ	98.1405	99.3251	0.628046	China	2014	Homo sapiens	XH787	sputum
GCF_001862895.1	PRJNA224116	SAMN04745522	Scaffold	REFSEQ	98.1327	98.8001	0.628046	China	2013	Homo sapiens	XH792	sputum
GCF_001861695.1	PRJNA224116	SAMN04745523	Scaffold	REFSEQ	98.1427	99.9813	0.628046	China	2013	Homo sapiens	XH793	sputum
GCF_001862955.1	PRJNA224116	SAMN04745525	Scaffold	REFSEQ	98.1349	99.9813	0.628046	China	2014	Homo sapiens	XH795	sputum
GCF_001862975.1	PRJNA224116	SAMN04745527	Scaffold	REFSEQ	98.1735	96.8316	0.628046	China	2014	Homo sapiens	XH797	sputum
GCF_001862985.1	PRJNA224116	SAMN04745528	Scaffold	REFSEQ	98.0834	99.9813	0.609299	China	2014	Homo sapiens	XH798	sputum
GCF_001861735.1	PRJNA224116	SAMN04745529	Scaffold	REFSEQ	98.0875	99.9813	0.633905	China	2014	Homo sapiens	XH799	sputum
GCF_001863015.1	PRJNA224116	SAMN04745530	Scaffold	REFSEQ	98.1416	99.3251	0.714821	China	2013	Homo sapiens	XH800	sputum
GCF_001861745.1	PRJNA224116	SAMN04745531	Scaffold	REFSEQ	98.0592	99.9813	0.652748	China	2013	Homo sapiens	XH801	sputum
GCF_001863035.1	PRJNA224116	SAMN04745532	Scaffold	REFSEQ	98.0913	99.5876	0.773324	China	2014	Homo sapiens	XH802	sputum
GCF_001863065.1	PRJNA224116	SAMN04745534	Scaffold	REFSEQ	98.1091	99.5876	0.628046	China	2014	Homo sapiens	XH804	sputum
GCF_001863085.1	PRJNA224116	SAMN04745535	Scaffold	REFSEQ	98.1327	99.9813	0.628046	China	2014	Homo sapiens	XH805	sputum
GCF_001863115.1	PRJNA224116	SAMN04745536	Scaffold	REFSEQ	98.0879	99.9813	0.754108	China	2012	Homo sapiens	XH810	sputum
GCF_001863135.1	PRJNA224116	SAMN04745537	Scaffold	REFSEQ	98.0848	99.9813	0.68129	China	2012	Homo sapiens	XH811	sputum
GCF_001863145.1	PRJNA224116	SAMN04745538	Scaffold	REFSEQ	98.1226	99.5876	1.57048	China	2014	Homo sapiens	XH819	sputum
GCF_001863165.1	PRJNA224116	SAMN04745539	Scaffold	REFSEQ	98.1148	99.9813	0.641622	China	2015	Homo sapiens	XH820	sputum
GCF_001861785.1	PRJNA224116	SAMN04745540	Scaffold	REFSEQ	98.1039	99.9813	0.628046	China	2013	Homo sapiens	XH823	sputum
GCF_001863205.1	PRJNA224116	SAMN04745544	Scaffold	REFSEQ	98.131	97.619	0.628046	China	2014	Homo sapiens	XH833	sputum
GCF_001861835.2	PRJNA224116	SAMN04745545	Scaffold	REFSEQ	98.1328	99.9813	0.628046	China	2014	Homo sapiens	XH834	sputum
GCF_001863225.1	PRJNA224116	SAMN04745546	Scaffold	REFSEQ	98.1009	99.9813	0.726472	China	2014	Homo sapiens	XH835	sputum
GCF_001861855.1	PRJNA224116	SAMN04745548	Scaffold	REFSEQ	98.1358	99.9813	0.628046	China	2013	Homo sapiens	XH837	sputum
GCF_001863275.1	PRJNA224116	SAMN04745549	Scaffold	REFSEQ	98.099	98.6112	0.628046	China	2013	Homo sapiens	XH838	sputum
GCF_001861865.1	PRJNA224116	SAMN04745550	Scaffold	REFSEQ	98.0983	99.1939	0.609299	China	2013	Homo sapiens	XH780	sputum
GCF_001861895.1	PRJNA224116	SAMN04745551	Scaffold	REFSEQ	98.2016	98.8001	0.628046	China	2013	Homo sapiens	XH781	sputum
GCF_001861905.1	PRJNA224116	SAMN04745553	Scaffold	REFSEQ	98.1354	99.9813	0.671791	China	2014	Homo sapiens	XH822	sputum
GCF_001861935.1	PRJNA224116	SAMN04745554	Scaffold	REFSEQ	97.8486	99.726	0.357686	China	2012	Homo sapiens	XH827	sputum
GCF_001861955.1	PRJNA224116	SAMN04745555	Scaffold	REFSEQ	97.8407	99.726	0.273973	China	2013	Homo sapiens	XH828	sputum
GCF_001861975.1	PRJNA224116	SAMN04745556	Scaffold	REFSEQ	98.067	99.9813	0.628046	China	2012	Homo sapiens	XH839	sputum
GCF_001863315.1	PRJNA224116	SAMN04745557	Scaffold	REFSEQ	98.0404	98.8001	1.07353	China	2012	Homo sapiens	XH840	sputum
GCF_001909135.1	PRJNA224116	SAMN04992847	Scaffold	REFSEQ	98.0598	99.5876	0.658331	India	2013	Homo sapiens	AB067	-
GCF_001700395.1	PRJNA224116	SAMN05003718	Scaffold	REFSEQ	98.1019	99.9813	1.47079	USA	2007	Homo sapiens	CU060707	blood
GCF_001700445.1	PRJNA224116	SAMN05005381	Scaffold	REFSEQ	98.0432	100	2.31887	USA	2013	Homo sapiens	CU032113	wound
GCF_001661665.1	PRJNA224116	SAMN05173197	Scaffold	REFSEQ	98.1065	99.9813	0.628046	China	2013	Homo sapiens	HJ01	kidney preservation fluid
GCF_001680105.1	PRJNA224116	SAMN05173200	Scaffold	REFSEQ	98.0994	99.9813	0.609299	China	2013	Homo sapiens	HJ03	kidney preservation fluid
GCF_001680115.1	PRJNA224116	SAMN05173213	Scaffold	REFSEQ	98.0884	99.9813	0.609299	China	2013	Homo sapiens	HJ04	kidney preservation fluid
GCF_001680265.1	PRJNA224116	SAMN05173225	Scaffold	REFSEQ	98.1047	99.9813	0.628046	China	2013	Homo sapiens	HJ05	kidney preservation fluid
GCF_001680285.1	PRJNA224116	SAMN05173229	Scaffold	REFSEQ	98.1072	99.9813	0.628046	China	2013	Homo sapiens	HJ06	kidney preservation fluid
GCF_001680185.1	PRJNA224116	SAMN05173231	Scaffold	REFSEQ	98.1205	99.1939	0.628046	China	2013	Homo sapiens	HJ07	kidney preservation fluid
GCF_001680195.1	PRJNA224116	SAMN05173233	Scaffold	REFSEQ	98.1056	98.8001	0.628046	China	2013	Homo sapiens	HJ08	kidney preservation fluid
GCF_001680215.1	PRJNA224116	SAMN05173236	Scaffold	REFSEQ	98.1064	99.9813	0.628046	China	2014	Homo sapiens	HJ10	kidney preservation fluid
GCF_001680225.1	PRJNA224116	SAMN05177789	Scaffold	REFSEQ	98.1129	99.5876	0.628046	China	2014	Homo sapiens	HJ11	kidney preservation fluid
GCF_001680295.1	PRJNA224116	SAMN05177790	Scaffold	REFSEQ	98.1152	99.9813	0.824897	China	2014	Homo sapiens	HJ12	kidney preservation fluid
GCF_001680305.1	PRJNA224116	SAMN05177791	Scaffold	REFSEQ	98.0986	99.9813	0.609299	China	2014	Homo sapiens	HJ13	kidney preservation fluid
GCF_001680345.1	PRJNA224116	SAMN05178265	Scaffold	REFSEQ	98.1292	99.5876	0.628046	China	2014	Homo sapiens	HJ16	kidney preservation fluid
GCF_001680365.1	PRJNA224116	SAMN05178483	Scaffold	REFSEQ	98.1275	99.9813	0.628046	China	2014	Homo sapiens	HJ16-2	draining liquid of kidney transplantation recipient
GCF_001680475.1	PRJNA224116	SAMN05178485	Scaffold	REFSEQ	98.1262	99.5876	0.628046	China	2014	Homo sapiens	HJ18	kidney preservation fluid
GCF_001680375.1	PRJNA224116	SAMN05178494	Scaffold	REFSEQ	98.1311	99.9813	0.628046	China	2014	Homo sapiens	HJ18-2	draining liquid of kidney transplantation recipient
GCF_001680395.1	PRJNA224116	SAMN05178495	Scaffold	REFSEQ	98.1303	99.9813	0.628046	China	2014	Homo sapiens	HJ19	draining liquid of kidney transplantation recipient
GCF_001680425.1	PRJNA224116	SAMN05178496	Scaffold	REFSEQ	98.1361	99.9813	0.628046	China	2014	Homo sapiens	HJ19-2	draining liquid of kidney transplantation recipient
GCF_001680445.1	PRJNA224116	SAMN05178517	Scaffold	REFSEQ	98.1362	99.5876	0.628046	China	2014	Homo sapiens	HJ20	draining liquid of kidney transplantation recipient
GCF_001693105.1	PRJNA224116	SAMN05257110	Scaffold	REFSEQ	98.0094	100	2.33276	Poland	2013	white stork nestling	192/2C	-
GCF_001693095.1	PRJNA224116	SAMN05257111	Scaffold	REFSEQ	97.934	100	1.20491	Germany	2013	goose	3.5D	-
GCF_001693115.1	PRJNA224116	SAMN05257112	Scaffold	REFSEQ	97.8489	100	1.50685	Germany	2012	chicken	65	-
GCF_001693175.1	PRJNA224116	SAMN05257114	Scaffold	REFSEQ	97.9473	100	3.07705	Poland	2014	white stork nestling	42R3	-
GCF_001704675.1	PRJNA224116	SAMN05292947	Scaffold	REFSEQ	97.8931	100	1.18721	Germany	2011	dog	IHIT17886	-
GCF_001704705.1	PRJNA224116	SAMN05292962	Scaffold	REFSEQ	97.8944	100	3.1094	Germany	2011	dog	IHIT17966	-
GCF_001704695.1	PRJNA224116	SAMN05292963	Scaffold	REFSEQ	97.8927	100	1.0137	Germany	2011	Homo sapiens	IHIT25424	-
GCF_001704685.1	PRJNA224116	SAMN05292964	Scaffold	REFSEQ	98.0993	99.9813	1.19726	Germany	2014	Homo sapiens	IHIT29106	-
GCF_002119265.1	PRJNA224116	SAMN05590239	Scaffold	REFSEQ	97.9253	100	0	Spain	2010	Homo sapiens	71	blood
GCF_002119355.1	PRJNA224116	SAMN05590405	Scaffold	REFSEQ	97.9409	100	0	Spain	2010	Homo sapiens	440	blood
GCF_001721455.1	PRJNA224116	SAMN05601611	Scaffold	REFSEQ	97.9861	100	0.684932	China	2014	missing	XH191	missing
GCF_001721445.1	PRJNA224116	SAMN05601612	Scaffold	REFSEQ	97.991	100	0.684932	China	2014	missing	XH181	missing
GCF_001721385.1	PRJNA224116	SAMN05601613	Scaffold	REFSEQ	97.9889	100	0.449962	China	2014	missing	XH192	missing
GCF_001721425.1	PRJNA224116	SAMN05601614	Scaffold	REFSEQ	97.9987	100	0.471842	China	2014	missing	XH182	missing
GCF_001721465.1	PRJNA224116	SAMN05601615	Scaffold	REFSEQ	97.9832	99.726	0.958904	China	2014	missing	XH183	missing
GCF_001721365.1	PRJNA224116	SAMN05601616	Scaffold	REFSEQ	97.9906	99.6347	0.273973	China	2014	missing	XH193	missing
GCF_001721475.1	PRJNA224116	SAMN05601617	Scaffold	REFSEQ	97.9949	99.726	0.410959	China	2014	missing	XH184	missing
GCF_001721375.1	PRJNA224116	SAMN05601618	Scaffold	REFSEQ	97.9945	99.6347	0.502283	China	2014	missing	XH198	missing
GCF_001997285.1	PRJNA224116	SAMN05721782	Scaffold	REFSEQ	97.9571	100	0	missing	missing	missing	ATCC 17945	missing
GCF_002093815.1	PRJNA224116	SAMN05730164	Scaffold	REFSEQ	98.0754	99.5876	0.672885	China	2012	Homo sapiens	ZJ06-200P5-1	-
GCF_002811175.1	PRJNA224116	SAMN05792419	Scaffold	REFSEQ	99.9894	99.6347	0	USA	1948	Homo sapiens	ATCC 19606	urine
GCF_003332235.1	PRJNA224116	SAMN06061923	Scaffold	REFSEQ	98.0853	99.1282	0.628046	China	2012	Homo sapiens	s201	sputum
GCF_001949935.1	PRJNA224116	SAMN06099616	Scaffold	REFSEQ	98.0775	99.863	0.273973	Spain	2010	Homo sapiens	Ab33_GEIH-2010	missing
GCF_001950165.1	PRJNA224116	SAMN06100271	Scaffold	REFSEQ	98.0493	99.469	0.712897	Spain	2010	Homo sapiens	Ab49_GEIH-2010	missing
GCF_001949945.1	PRJNA224116	SAMN06106557	Scaffold	REFSEQ	98.0789	99.4977	0.821918	Spain	2010	Homo sapiens	Ab54_GEIH-2010	missing
GCF_001950035.1	PRJNA224116	SAMN06106560	Scaffold	REFSEQ	98.0829	99.3607	0.846824	Spain	2010	Homo sapiens	Ab104_GEIH-2010	missing
GCF_001950195.1	PRJNA224116	SAMN06106561	Scaffold	REFSEQ	98.0759	100	0	Spain	2010	Homo sapiens	Ab121_GEIH-2010	missing
GCF_001950065.1	PRJNA224116	SAMN06106563	Scaffold	REFSEQ	98.0246	98.6319	0.562956	Spain	2000	Homo sapiens	Ab158_GEIH-2000	missing
GCF_001950285.1	PRJNA224116	SAMN06106564	Scaffold	REFSEQ	98.1031	99.9087	0.958904	Spain	2000	Homo sapiens	Ab161_GEIH-2000	missing
GCF_001950215.1	PRJNA224116	SAMN06106568	Scaffold	REFSEQ	98.1253	100	0.273973	Spain	2000	Homo sapiens	Ab177_GEIH-2000	missing
GCF_002072795.1	PRJNA224116	SAMN06191490	Scaffold	REFSEQ	98.0808	99.9813	0.75928	China	2016	Homo sapiens	TDAB1	blood
GCF_001951035.1	PRJNA224116	SAMN06218435	Scaffold	REFSEQ	98.112	99.5876	0.628046	China	-	Homo sapiens	A13	sputum from 85 year old female
GCF_002760695.1	PRJNA224116	SAMN06459018	Scaffold	REFSEQ	97.8105	98.9772	0.821918	Tunisia	2013	Homo sapiens	MBL_M1	urine
GCF_002760715.1	PRJNA224116	SAMN06459221	Scaffold	REFSEQ	97.8162	99.6347	0.410959	Tunisia	2015	Homo sapiens	MBL_M4	blood
GCF_003357085.1	PRJNA224116	SAMN06460836	Scaffold	REFSEQ	98.0713	99.5219	0.628046	China	2012	Homo sapiens	s202	sputum
GCF_003357045.1	PRJNA224116	SAMN06460837	Scaffold	REFSEQ	98.0864	99.8525	1.02175	China	2012	Homo sapiens	s203	sputum
GCF_003357025.1	PRJNA224116	SAMN06460838	Scaffold	REFSEQ	98.0957	99.5688	1.02175	China	2012	Homo sapiens	s204	sputum
GCF_003357035.1	PRJNA224116	SAMN06460839	Scaffold	REFSEQ	98.0911	99.429	0.628046	China	2012	Homo sapiens	s206	sputum
GCF_003357005.1	PRJNA224116	SAMN06460840	Scaffold	REFSEQ	98.1024	99.0626	0.628046	China	2012	Homo sapiens	s207	sputum
GCF_003356965.1	PRJNA224116	SAMN06460841	Scaffold	REFSEQ	98.0823	99.301	0.628046	China	2012	Homo sapiens	s208	sputum
GCF_003356975.1	PRJNA224116	SAMN06460842	Scaffold	REFSEQ	98.095	99.5084	0.628046	China	2012	Homo sapiens	s209	sputum
GCF_003356945.1	PRJNA224116	SAMN06460843	Scaffold	REFSEQ	98.0771	99.9156	0.656168	China	2012	Homo sapiens	s210	sputum
GCF_003356925.1	PRJNA224116	SAMN06460844	Scaffold	REFSEQ	97.9726	99.2923	1.003	China	2011	Homo sapiens	s211	sputum
GCF_003356875.1	PRJNA224116	SAMN06460845	Scaffold	REFSEQ	97.9881	99.2168	1.003	China	2011	Homo sapiens	s212	sputum
GCF_003356905.1	PRJNA224116	SAMN06460846	Scaffold	REFSEQ	97.9753	99.3495	1.003	China	2011	Homo sapiens	s213	sputum
GCF_003356865.1	PRJNA224116	SAMN06460847	Scaffold	REFSEQ	97.953	99.4891	1.003	China	2011	Homo sapiens	s214	sputum
GCF_003356845.1	PRJNA224116	SAMN06460848	Scaffold	REFSEQ	97.9551	99.4454	1.003	China	2011	Homo sapiens	s215	sputum
GCF_003356815.1	PRJNA224116	SAMN06460849	Scaffold	REFSEQ	97.9762	99.4891	1.003	China	2011	Homo sapiens	s216	sputum
GCF_003356795.1	PRJNA224116	SAMN06460850	Scaffold	REFSEQ	97.9737	99.7953	1.003	China	2012	Homo sapiens	s217	sputum
GCF_003356765.1	PRJNA224116	SAMN06460851	Scaffold	REFSEQ	97.9658	99.4516	1.003	China	2012	Homo sapiens	s218	sputum
GCF_003356785.1	PRJNA224116	SAMN06460852	Scaffold	REFSEQ	97.9687	99.4099	1.003	China	2012	Homo sapiens	s219	sputum
GCF_003356745.1	PRJNA224116	SAMN06460853	Scaffold	REFSEQ	97.9892	99.8828	1.003	China	2012	Homo sapiens	s220	sputum
GCF_003356725.1	PRJNA224116	SAMN06460854	Scaffold	REFSEQ	97.9823	99.3579	1.003	China	2012	Homo sapiens	s221	sputum
GCF_003356705.1	PRJNA224116	SAMN06460855	Scaffold	REFSEQ	97.9744	99.3907	1.003	China	2012	Homo sapiens	s222	sputum
GCF_003356685.1	PRJNA224116	SAMN06460856	Scaffold	REFSEQ	98.0796	99.5219	0.628046	China	2012	Homo sapiens	s223	sputum
GCF_003356645.1	PRJNA224116	SAMN06460857	Scaffold	REFSEQ	98.0945	99.9419	0.628046	China	2012	Homo sapiens	s224	sputum
GCF_003356635.1	PRJNA224116	SAMN06460858	Scaffold	REFSEQ	98.0765	99.527	0.628046	China	2012	Homo sapiens	s225	sputum
GCF_003356605.1	PRJNA224116	SAMN06460859	Scaffold	REFSEQ	98.0907	99.9484	0.628046	China	2012	Homo sapiens	s226	sputum
GCF_003356625.1	PRJNA224116	SAMN06460860	Scaffold	REFSEQ	98.0646	99.386	1.02175	China	2012	Homo sapiens	s227	sputum
GCF_003356575.1	PRJNA224116	SAMN06460861	Scaffold	REFSEQ	97.9923	98.9204	0.937383	China	2012	Homo sapiens	s228	sputum
GCF_003356565.1	PRJNA224116	SAMN06460862	Scaffold	REFSEQ	98.0735	99.5313	0.609299	China	2012	Homo sapiens	s229	sputum
GCF_003356535.1	PRJNA224116	SAMN06460863	Scaffold	REFSEQ	98.0613	99.0954	0.628046	China	2012	Homo sapiens	s230	sputum
GCF_003356525.1	PRJNA224116	SAMN06460864	Scaffold	REFSEQ	98.0251	99.9025	0.628046	China	2013	Homo sapiens	s231	sputum
GCF_003356505.1	PRJNA224116	SAMN06460865	Scaffold	REFSEQ	98.0657	99.9152	0.628046	China	2013	Homo sapiens	s232	sputum
GCF_003356485.1	PRJNA224116	SAMN06460866	Scaffold	REFSEQ	98.0631	99.9813	0.609299	China	2012	Homo sapiens	s233	sputum
GCF_003356425.1	PRJNA224116	SAMN06460867	Scaffold	REFSEQ	98.0127	99.8828	0.609299	China	2012	Homo sapiens	s234	sputum
GCF_003356455.1	PRJNA224116	SAMN06460868	Scaffold	REFSEQ	98.0587	99.5876	0.609299	China	2012	Homo sapiens	s235	sputum
GCF_003356405.1	PRJNA224116	SAMN06460869	Scaffold	REFSEQ	98.0571	99.5876	0.609299	China	2012	Homo sapiens	s236	sputum
GCF_003356445.1	PRJNA224116	SAMN06460870	Scaffold	REFSEQ	98.0279	99.4375	0.609299	China	2012	Homo sapiens	s237	sputum
GCF_003356385.1	PRJNA224116	SAMN06460871	Scaffold	REFSEQ	97.9969	99.5876	0.609299	China	2012	Homo sapiens	s238	sputum
GCF_003356365.1	PRJNA224116	SAMN06460872	Scaffold	REFSEQ	98.0594	99.5407	0.609299	China	2012	Homo sapiens	s239	sputum
GCF_003356345.1	PRJNA224116	SAMN06460873	Scaffold	REFSEQ	98.0589	99.4235	0.609299	China	2012	Homo sapiens	s240	sputum
GCF_003356315.1	PRJNA224116	SAMN06460874	Scaffold	REFSEQ	98.0724	99.5187	0.609299	China	2012	Homo sapiens	s241	sputum
GCF_003356295.1	PRJNA224116	SAMN06460875	Scaffold	REFSEQ	98.06	98.3408	0.609299	China	2012	Homo sapiens	s242	sputum
GCF_003356285.1	PRJNA224116	SAMN06460876	Scaffold	REFSEQ	98.0492	99.5876	0.609299	China	2011	Homo sapiens	s243	sputum
GCF_003356265.1	PRJNA224116	SAMN06460877	Scaffold	REFSEQ	98.0507	99.4432	0.609299	China	2011	Homo sapiens	s244	sputum
GCF_003356235.1	PRJNA224116	SAMN06460878	Scaffold	REFSEQ	98.0393	99.4301	0.631171	China	2011	Homo sapiens	s245	sputum
GCF_003356205.1	PRJNA224116	SAMN06460879	Scaffold	REFSEQ	98.0621	99.5383	1.003	China	2011	Homo sapiens	s246	sputum
GCF_003356225.1	PRJNA224116	SAMN06460880	Scaffold	REFSEQ	98.0379	99.3827	0.609299	China	2011	Homo sapiens	s247	sputum
GCF_003356185.1	PRJNA224116	SAMN06460881	Scaffold	REFSEQ	98.025	99.5876	0.609299	China	2011	Homo sapiens	s248	sputum
GCF_003356155.1	PRJNA224116	SAMN06460882	Scaffold	REFSEQ	98.0586	99.5044	0.609299	China	2011	Homo sapiens	s249	sputum
GCF_003356145.1	PRJNA224116	SAMN06460883	Scaffold	REFSEQ	98.0463	98.9701	0.609299	China	2011	Homo sapiens	s250	sputum
GCF_003356125.1	PRJNA224116	SAMN06460884	Scaffold	REFSEQ	98.0574	99.3251	0.609299	China	2011	Homo sapiens	s251	sputum
GCF_003356105.1	PRJNA224116	SAMN06460885	Scaffold	REFSEQ	98.0379	99.3495	0.628046	China	2012	Homo sapiens	s252	sputum
GCF_003356085.1	PRJNA224116	SAMN06460886	Scaffold	REFSEQ	98.075	99.9813	0.628046	China	2012	Homo sapiens	s253	sputum
GCF_003356045.1	PRJNA224116	SAMN06460887	Scaffold	REFSEQ	98.0434	99.4482	1.02175	China	2012	Homo sapiens	s254	sputum
GCF_003356055.1	PRJNA224116	SAMN06460888	Scaffold	REFSEQ	98.005	99.434	0.628046	China	2012	Homo sapiens	s255	sputum
GCF_003356025.1	PRJNA224116	SAMN06460889	Scaffold	REFSEQ	97.8902	99.3151	0	China	2012	Homo sapiens	s256	sputum
GCF_003355965.1	PRJNA224116	SAMN06460890	Scaffold	REFSEQ	98.0004	98.1208	0.628046	China	2012	Homo sapiens	s257	sputum
GCF_003355945.1	PRJNA224116	SAMN06460891	Scaffold	REFSEQ	98.039	99.4479	0.628046	China	2012	Homo sapiens	s258	sputum
GCF_003355995.1	PRJNA224116	SAMN06460892	Scaffold	REFSEQ	98.0126	99.3495	0.628046	China	2012	Homo sapiens	s259	sputum
GCF_003355985.1	PRJNA224116	SAMN06460893	Scaffold	REFSEQ	98.0454	99.1343	0.643795	China	2012	Homo sapiens	s260	sputum
GCF_003355915.1	PRJNA224116	SAMN06460894	Scaffold	REFSEQ	98.0707	99.426	0.628046	China	2012	Homo sapiens	s261	sputum
GCF_003355885.1	PRJNA224116	SAMN06460895	Scaffold	REFSEQ	98.0641	99.5088	1.02175	China	2012	Homo sapiens	s262	sputum
GCF_003355875.1	PRJNA224116	SAMN06460896	Scaffold	REFSEQ	98.0572	99.9813	0.628046	China	2012	Homo sapiens	s263	sputum
GCF_003355865.1	PRJNA224116	SAMN06460897	Scaffold	REFSEQ	98.0877	99.5022	0.628046	China	2012	Homo sapiens	s264	sputum
GCF_003355845.1	PRJNA224116	SAMN06460898	Scaffold	REFSEQ	98.0867	99.5383	1.02175	China	2012	Homo sapiens	s265	sputum
GCF_003355815.1	PRJNA224116	SAMN06460899	Scaffold	REFSEQ	98.0855	99.4104	0.628046	China	2012	Homo sapiens	s266	sputum
GCF_003355785.1	PRJNA224116	SAMN06460900	Scaffold	REFSEQ	98.0703	99.8854	0.628046	China	2012	Homo sapiens	s267	sputum
GCF_003355795.1	PRJNA224116	SAMN06460901	Scaffold	REFSEQ	98.0846	99.4647	0.628046	China	2012	Homo sapiens	s268	sputum
GCF_003355755.1	PRJNA224116	SAMN06460902	Scaffold	REFSEQ	98.0083	99.2519	0.609299	China	2011	Homo sapiens	s269	sputum
GCF_003355745.1	PRJNA224116	SAMN06460903	Scaffold	REFSEQ	98.0043	99.5313	0.609299	China	2012	Homo sapiens	s270	sputum
GCF_003355705.1	PRJNA224116	SAMN06460904	Scaffold	REFSEQ	97.8936	97.408	0.609299	China	2012	Homo sapiens	s271	sputum
GCF_003355725.1	PRJNA224116	SAMN06460905	Scaffold	REFSEQ	98.0142	99.5876	0.609299	China	2012	Homo sapiens	s272	sputum
GCF_003355675.1	PRJNA224116	SAMN06460906	Scaffold	REFSEQ	98.0397	99.5156	0.609299	China	2012	Homo sapiens	s273	sputum
GCF_003355665.1	PRJNA224116	SAMN06460907	Scaffold	REFSEQ	98.006	99.3907	0.609299	China	2012	Homo sapiens	s274	sputum
GCF_003355605.1	PRJNA224116	SAMN06460908	Scaffold	REFSEQ	98.044	99.5876	0.609299	China	2012	Homo sapiens	s275	sputum
GCF_003355595.1	PRJNA224116	SAMN06460909	Scaffold	REFSEQ	98.0522	99.8172	0.609299	China	2012	Homo sapiens	s276	sputum
GCF_003355585.1	PRJNA224116	SAMN06460910	Scaffold	REFSEQ	98.035	99.5715	0.609299	China	2012	Homo sapiens	s277	sputum
GCF_002760785.1	PRJNA224116	SAMN06461248	Scaffold	REFSEQ	97.803	99.726	0.410959	Tunisia	2015	Homo sapiens	MBL_M6	urine
GCF_002760845.1	PRJNA224116	SAMN06461369	Scaffold	REFSEQ	97.8202	98.5543	1.37479	Tunisia	2015	Homo sapiens	MBL_M9	urine
GCF_002760835.1	PRJNA224116	SAMN06461382	Scaffold	REFSEQ	97.8105	98.9772	0.821918	Tunisia	2015	Homo sapiens	MBL_M10	blood
GCF_002237955.1	PRJNA224116	SAMN06650259	Scaffold	REFSEQ	98.0759	99.9813	0.82088	South Korea	2013	Homo sapiens	SSMA8	Clean voided urine
GCF_002116575.1	PRJNA224116	SAMN06760911	Scaffold	REFSEQ	98.132	99.9813	0.628046	China	2012	Homo sapiens	2012046	not collected
GCF_002573905.1	PRJNA224116	SAMN07236632	Scaffold	REFSEQ	97.9466	100	0.273973	Germany	2016	goose	GaenseEi-1	egg shells
GCF_002573795.1	PRJNA224116	SAMN07236641	Scaffold	REFSEQ	97.8766	100	0.410959	Germany	2015	chicken	GB1-2	-
GCF_002573815.1	PRJNA224116	SAMN07236642	Scaffold	REFSEQ	97.9008	100	0.547945	Germany	2015	white stork	LoGeIst3-1	-
GCF_002277515.1	PRJNA224116	SAMN07251701	Scaffold	REFSEQ	98.086	99.5876	0.641622	China	2015	Homo sapiens	AB46	sputum
GCF_002277715.1	PRJNA224116	SAMN07251702	Scaffold	REFSEQ	98.1086	99.5876	0.628046	China	2015	Homo sapiens	AB52	sputum
GCF_002277505.1	PRJNA224116	SAMN07251703	Scaffold	REFSEQ	98.1015	99.5876	1.2186	China	2015	Homo sapiens	AB54	sputum
GCF_002277485.1	PRJNA224116	SAMN07251704	Scaffold	REFSEQ	98.1032	99.5876	0.628046	China	2015	Homo sapiens	AB56	Vaginal secretion
GCF_002277705.1	PRJNA224116	SAMN07251705	Scaffold	REFSEQ	98.0916	99.5438	0.628046	China	2015	Homo sapiens	AB72	sputum
GCF_002277675.1	PRJNA224116	SAMN07251706	Scaffold	REFSEQ	98.1063	99.1939	0.628046	China	2015	Homo sapiens	AB73	sputum
GCF_002277655.1	PRJNA224116	SAMN07251707	Scaffold	REFSEQ	98.0947	99.5876	0.628046	China	2015	Homo sapiens	AB74	Arteriovenous catheter
GCF_002277635.1	PRJNA224116	SAMN07251710	Scaffold	REFSEQ	98.0872	99.5876	1.10476	China	2015	Homo sapiens	AB81	sputum
GCF_002277445.1	PRJNA224116	SAMN07251711	Scaffold	REFSEQ	98.0881	99.5876	0.641622	China	2015	Homo sapiens	AB88	sputum
GCF_002277435.1	PRJNA224116	SAMN07251712	Scaffold	REFSEQ	98.1103	99.5876	0.628046	China	2015	Homo sapiens	AB89	sputum
GCF_002277385.1	PRJNA224116	SAMN07251713	Scaffold	REFSEQ	98.097	99.5876	0.677259	China	2015	Homo sapiens	AB91	sputum
GCF_002277405.1	PRJNA224116	SAMN07251714	Scaffold	REFSEQ	98.0825	99.5876	0.693663	China	2015	Homo sapiens	AB96	Umbilical cord secretions
GCF_002277365.1	PRJNA224116	SAMN07251715	Scaffold	REFSEQ	98.0953	99.5876	0.628046	China	2015	Homo sapiens	AB99	Umbilical cord secretions
GCF_002277355.1	PRJNA224116	SAMN07251716	Scaffold	REFSEQ	98.1016	99.5876	1.21551	China	2015	Homo sapiens	AB100	sputum
GCF_002277605.1	PRJNA224116	SAMN07251717	Scaffold	REFSEQ	98.0922	99.5876	0.628046	China	2015	Homo sapiens	AB101	bile
GCF_002277325.1	PRJNA224116	SAMN07251718	Scaffold	REFSEQ	98.0853	99.5876	0.677259	China	2015	Homo sapiens	AB108	sputum
GCF_002277285.1	PRJNA224116	SAMN07251719	Scaffold	REFSEQ	98.1053	99.5876	0.726472	China	2015	Homo sapiens	AB112	sputum
GCF_002277315.1	PRJNA224116	SAMN07251720	Scaffold	REFSEQ	98.0971	99.5876	0.646794	China	2015	Homo sapiens	AB118	Pus
GCF_002277275.1	PRJNA224116	SAMN07251721	Scaffold	REFSEQ	98.0973	99.9813	0.726472	China	2015	Homo sapiens	AB134	sputum
GCF_002277235.1	PRJNA224116	SAMN07251722	Scaffold	REFSEQ	98.0862	99.1939	1.99601	China	2015	Homo sapiens	AB147	sputum
GCF_002277585.1	PRJNA224116	SAMN07251723	Scaffold	REFSEQ	98.0767	99.5876	0.892858	China	2015	Homo sapiens	AB156	sputum
GCF_002277225.1	PRJNA224116	SAMN07251724	Scaffold	REFSEQ	98.0851	99.5876	0.628046	China	2015	Homo sapiens	AB161	sputum
GCF_002277215.1	PRJNA224116	SAMN07251725	Scaffold	REFSEQ	98.0974	99.5876	0.628046	China	2015	Homo sapiens	AB162	sputum
GCF_002277185.1	PRJNA224116	SAMN07251726	Scaffold	REFSEQ	98.0805	99.4651	0.628046	China	2015	Homo sapiens	AB165	Arteriovenous catheter
GCF_002277145.1	PRJNA224116	SAMN07251729	Scaffold	REFSEQ	98.1022	99.5876	0.767315	China	2015	Homo sapiens	AB173	sputum
GCF_002277535.1	PRJNA224116	SAMN07251730	Scaffold	REFSEQ	98.1014	99.5876	0.638687	China	2015	Homo sapiens	AB174	sputum
GCF_002245595.1	PRJNA224116	SAMN07257378	Scaffold	REFSEQ	97.8154	100	0	Brazil	2012	Homo sapiens	13	tracheal aspirate
GCF_002238075.1	PRJNA224116	SAMN07268441	Scaffold	REFSEQ	98.0441	98.2364	1.13423	Cote d'Ivoire	2013	Homo sapiens	Ab_12	urine
GCF_002245665.1	PRJNA224116	SAMN07286190	Scaffold	REFSEQ	97.7824	100	0.0913242	Brazil	2011	-	15	bedside table
GCF_002928195.1	PRJNA224116	SAMN07303762	Scaffold	REFSEQ	97.9926	99.9087	0.136986	Honduras	2015	Homo sapiens	MCR56	blood
GCF_002928155.1	PRJNA224116	SAMN07303763	Scaffold	REFSEQ	97.9572	99.9087	0.410959	Honduras	2015	Homo sapiens	MCR8683	wound
GCF_002927895.1	PRJNA224116	SAMN07303764	Scaffold	REFSEQ	97.9848	100	0	Honduras	2016	Homo sapiens	IHSS3526	Endobronchial tube
GCF_002927855.1	PRJNA224116	SAMN07303765	Scaffold	REFSEQ	97.8378	99.9087	0	Honduras	2016	Homo sapiens	HEU3	Cornea secretion
GCF_002928035.1	PRJNA224116	SAMN07303767	Scaffold	REFSEQ	98.0897	99.0411	0.0913242	Honduras	2015	Homo sapiens	MCR6739	Vesical catheter
GCF_002928145.1	PRJNA224116	SAMN07303769	Scaffold	REFSEQ	97.9842	100	0.136986	Honduras	2015	Homo sapiens	HC9436	Endobronchial tube
GCF_002928135.1	PRJNA224116	SAMN07303770	Scaffold	REFSEQ	98.016	100	0.821918	Honduras	2015	Homo sapiens	MCR6056	blood
GCF_002928015.1	PRJNA224116	SAMN07303771	Scaffold	REFSEQ	97.9711	99.726	0.136986	Honduras	2015	Homo sapiens	MCR8676	Vesical catheter
GCF_002927775.1	PRJNA224116	SAMN07303773	Scaffold	REFSEQ	97.842	100	0.205479	Honduras	2015	Homo sapiens	MCR9238	wound
GCF_002927995.1	PRJNA224116	SAMN07303774	Scaffold	REFSEQ	97.8372	99.6347	0	Honduras	2015	Homo sapiens	MCR10126	Endobronchial tube
GCF_002927805.1	PRJNA224116	SAMN07303775	Scaffold	REFSEQ	97.8443	100	0.136986	Honduras	2015	Homo sapiens	MCR10172	wound
GCF_002927965.1	PRJNA224116	SAMN07303776	Scaffold	REFSEQ	97.8504	100	0	Honduras	2015	Homo sapiens	MCR10179	Endobronchial tube
GCF_002634345.1	PRJNA224116	SAMN07311775	Scaffold	REFSEQ	98.0775	99.049	1.17798	Cote d'Ivoire	2014	Homo sapiens	ABA1614	University Hospital of Yamoussoukro
GCF_002634325.1	PRJNA224116	SAMN07311776	Scaffold	REFSEQ	98.0566	99.4235	1.15845	Cote d'Ivoire	2014	Homo sapiens	ABA2114	University Hospital of Abidjan-Yopougon
GCF_014334965.1	PRJNA224116	SAMN07514508	Scaffold	REFSEQ	97.9159	99.5662	0.273973	Togo	2016	Homo sapiens	Abau971	urine
GCF_014334855.1	PRJNA224116	SAMN07514509	Scaffold	REFSEQ	97.9591	99.4521	0.989346	Togo	2016	Homo sapiens	Abau462	urine
GCF_014334885.1	PRJNA224116	SAMN07514511	Scaffold	REFSEQ	97.8931	99.3151	0.136986	Togo	2016	Homo sapiens	Abau441	urine
GCF_014334905.1	PRJNA224116	SAMN07514513	Scaffold	REFSEQ	97.8092	99.4977	0.136986	Togo	2016	Homo sapiens	Abau851	urine
GCF_014334865.1	PRJNA224116	SAMN07514514	Scaffold	REFSEQ	97.9045	99.9087	0.273973	Togo	2016	Homo sapiens	Abau446	pus
GCF_003670075.1	PRJNA224116	SAMN07534975	Scaffold	REFSEQ	97.9581	99.2237	1.64479	Togo	2016	Homo sapiens	237	cerebrospinal fluid
GCF_003615295.1	PRJNA224116	SAMN07535943	Scaffold	REFSEQ	97.8352	99.214	3.60122	Togo	2016	Homo sapiens	249	pus
GCF_002288625.1	PRJNA224116	SAMN07551566	Scaffold	REFSEQ	97.9446	98.6301	2.48206	Togo	2016	Homo sapiens	460	pus
GCF_002727055.2	PRJNA224116	SAMN07689236	Scaffold	REFSEQ	97.9749	100	2.0498	Brazil	2014	Aeschynomene fluminensis	I43	inner root
GCF_002863545.1	PRJNA224116	SAMN07785154	Scaffold	REFSEQ	98.046	99.7049	0.628046	India	2013	Homo sapiens	GU71	hospital
GCF_028178545.1	PRJNA224116	SAMN07944246	Scaffold	REFSEQ	97.9748	98.989	0.609299	China	2011	Homo sapiens	Ab4573	sputum
GCF_028178455.1	PRJNA224116	SAMN07944247	Scaffold	REFSEQ	98.0585	99.2463	0.609299	China	2011	Homo sapiens	Ab4584	sputum
GCF_028178425.1	PRJNA224116	SAMN07944248	Scaffold	REFSEQ	98.0906	98.7083	0.609299	China	2011	Homo sapiens	Ab4600	sputum
GCF_028178345.1	PRJNA224116	SAMN07944249	Scaffold	REFSEQ	98.085	98.715	0.609299	China	2011	Homo sapiens	Ab4624	sputum
GCF_028178355.1	PRJNA224116	SAMN07944250	Scaffold	REFSEQ	97.9414	98.1882	0.609299	China	2011	Homo sapiens	Ab4625	bile
GCF_028177005.1	PRJNA224116	SAMN07944251	Scaffold	REFSEQ	98.1	99.2227	0.609299	China	2011	Homo sapiens	Ab4629	sputum
GCF_028177055.1	PRJNA224116	SAMN07944253	Scaffold	REFSEQ	98.0875	99.2245	0.609299	China	2011	Homo sapiens	Ab4646	sputum
GCF_028177045.1	PRJNA224116	SAMN07944254	Scaffold	REFSEQ	98.0487	98.8001	0.609299	China	2011	Homo sapiens	Ab4650	sputum
GCF_028178265.1	PRJNA224116	SAMN07944255	Scaffold	REFSEQ	98.0782	98.8825	0.609299	China	2011	Homo sapiens	Ab4654	Swallow swab
GCF_028176955.1	PRJNA224116	SAMN07944256	Scaffold	REFSEQ	98.087	98.6907	0.609299	China	2011	Homo sapiens	Ab4663	sputum
GCF_028178245.1	PRJNA224116	SAMN07944257	Scaffold	REFSEQ	97.9739	99.0626	0.609299	China	2011	Homo sapiens	Ab4677	sputum
GCF_028176945.1	PRJNA224116	SAMN07944258	Scaffold	REFSEQ	97.9728	98.9211	1.003	China	2011	Homo sapiens	Ab4680	bile
GCF_028176855.1	PRJNA224116	SAMN07944259	Scaffold	REFSEQ	97.9938	99.3448	0.609299	China	2011	Homo sapiens	Ab4699	bile
GCF_028176825.1	PRJNA224116	SAMN07944260	Scaffold	REFSEQ	98.088	99.2818	1.003	China	2011	Homo sapiens	Ab4701	sputum
GCF_028176835.1	PRJNA224116	SAMN07944261	Scaffold	REFSEQ	97.9491	98.8646	0.609299	China	2011	Homo sapiens	Ab4708	sputum
GCF_028178175.1	PRJNA224116	SAMN07944262	Scaffold	REFSEQ	98.0834	98.9178	0.768907	China	2011	Homo sapiens	Ab4714	sputum
GCF_028176735.1	PRJNA224116	SAMN07944263	Scaffold	REFSEQ	98.0785	98.6942	0.609299	China	2011	Homo sapiens	Ab4715	sputum
GCF_028176715.1	PRJNA224116	SAMN07944265	Scaffold	REFSEQ	98.02	98.5284	0.609299	China	2011	Homo sapiens	Ab4721	bile
GCF_028176655.1	PRJNA224116	SAMN07944266	Scaffold	REFSEQ	98.0344	98.97	0.609299	China	2011	Homo sapiens	Ab4748	sputum
GCF_028176625.1	PRJNA224116	SAMN07944267	Scaffold	REFSEQ	98.0839	99.1365	0.609299	China	2011	Homo sapiens	Ab4749	bile
GCF_028176565.1	PRJNA224116	SAMN07944268	Scaffold	REFSEQ	97.8482	99.4435	0.182648	China	2011	Homo sapiens	Ab4752	bile
GCF_028176485.1	PRJNA224116	SAMN07944269	Scaffold	REFSEQ	98.0853	98.6044	0.609299	China	2011	Homo sapiens	Ab4759	sputum
GCF_028176455.1	PRJNA224116	SAMN07944270	Scaffold	REFSEQ	98.0831	99.5688	0.639584	China	2011	Homo sapiens	Ab4768	sputum
GCF_028176405.1	PRJNA224116	SAMN07944272	Scaffold	REFSEQ	98.0174	98.7214	0.609299	China	2011	Homo sapiens	Ab4782	sputum
GCF_028176365.1	PRJNA224116	SAMN07944273	Scaffold	REFSEQ	98.077	99.2759	0.609299	China	2011	Homo sapiens	Ab4791	sputum
GCF_028176305.1	PRJNA224116	SAMN07944274	Scaffold	REFSEQ	98.005	98.4721	0.609299	China	2011	Homo sapiens	Ab4792	sputum
GCF_028176245.1	PRJNA224116	SAMN07944275	Scaffold	REFSEQ	98.0288	99.3885	0.609299	China	2011	Homo sapiens	Ab4797	sputum
GCF_028176255.1	PRJNA224116	SAMN07944277	Scaffold	REFSEQ	97.9967	99.5769	0.609299	China	2011	Homo sapiens	Ab4860	sputum
GCF_028176165.1	PRJNA224116	SAMN07944278	Scaffold	REFSEQ	98.0798	99.4533	0.609299	China	2011	Homo sapiens	Ab4862	sputum
GCF_028176105.1	PRJNA224116	SAMN07944279	Scaffold	REFSEQ	98.0876	99.4891	0.609299	China	2011	Homo sapiens	Ab4871	bile
GCF_028178085.1	PRJNA224116	SAMN07944280	Scaffold	REFSEQ	98.0596	99.5219	0.609299	China	2011	Homo sapiens	Ab4874	sputum
GCF_028176005.1	PRJNA224116	SAMN07944282	Scaffold	REFSEQ	98.0829	97.8916	0.609299	China	2011	Homo sapiens	Ab4887	bile
GCF_028175925.1	PRJNA224116	SAMN07944285	Scaffold	REFSEQ	98.0703	98.5197	0.639584	China	2011	Homo sapiens	Ab4904	sputum
GCF_028178065.1	PRJNA224116	SAMN07944286	Scaffold	REFSEQ	97.9896	99.6347	0	China	2011	Homo sapiens	Ab4914	bile
GCF_028175945.1	PRJNA224116	SAMN07944287	Scaffold	REFSEQ	98.0043	99.4526	0.609299	China	2011	Homo sapiens	Ab4932	sputum
GCF_028175805.1	PRJNA224116	SAMN07944288	Scaffold	REFSEQ	98.0921	98.5837	0.609299	China	2011	Homo sapiens	Ab4935	bile
GCF_028178045.1	PRJNA224116	SAMN07944289	Scaffold	REFSEQ	98.0823	98.7601	0.609299	China	2011	Homo sapiens	Ab4939	sputum
GCF_028175765.1	PRJNA224116	SAMN07944290	Scaffold	REFSEQ	98.042	99.5219	0.609299	China	2011	Homo sapiens	Ab4941	sputum
GCF_028175665.1	PRJNA224116	SAMN07944291	Scaffold	REFSEQ	98.0845	98.5787	0.609299	China	2011	Homo sapiens	Ab4942	sputum
GCF_028175675.1	PRJNA224116	SAMN07944292	Scaffold	REFSEQ	98.0358	99.5219	0.609299	China	2011	Homo sapiens	Ab4964	sputum
GCF_028175815.1	PRJNA224116	SAMN07944293	Scaffold	REFSEQ	98.0281	99.3771	0.609299	China	2011	Homo sapiens	Ab4974	sputum
GCF_028177985.1	PRJNA224116	SAMN07944294	Scaffold	REFSEQ	98.0511	99.4427	0.628046	China	2011	Homo sapiens	Ab5003	sputum
GCF_028177875.1	PRJNA224116	SAMN07944295	Scaffold	REFSEQ	98.0439	99.3054	0.628046	China	2011	Homo sapiens	Ab5015	sputum
GCF_028177855.1	PRJNA224116	SAMN07944296	Scaffold	REFSEQ	97.8938	99.6804	0.273973	China	2011	Homo sapiens	Ab5076	sputum
GCF_028175615.1	PRJNA224116	SAMN07944297	Scaffold	REFSEQ	97.9355	99.1781	0.273973	China	2011	Homo sapiens	Ab5080	sputum
GCF_028177845.1	PRJNA224116	SAMN07944298	Scaffold	REFSEQ	98.1173	98.9905	0.628046	China	2011	Homo sapiens	Ab5087	sputum
GCF_028175585.1	PRJNA224116	SAMN07944300	Scaffold	REFSEQ	98.1073	99.7063	0.628046	China	2011	Homo sapiens	Ab5105	sputum
GCF_028175405.1	PRJNA224116	SAMN07944302	Scaffold	REFSEQ	98.1126	99.4071	0.628046	China	2011	Homo sapiens	Ab5124	sputum
GCF_028175425.1	PRJNA224116	SAMN07944303	Scaffold	REFSEQ	98.0472	99.5219	0.609299	China	2011	Homo sapiens	Ab5139	bile
GCF_028177865.1	PRJNA224116	SAMN07944304	Scaffold	REFSEQ	98.09	99.3796	0.75928	China	2011	Homo sapiens	Ab5152	sputum
GCF_028177755.1	PRJNA224116	SAMN07944305	Scaffold	REFSEQ	98.1129	98.8641	0.431196	China	2011	Homo sapiens	Ab5195	sputum
GCF_028175385.1	PRJNA224116	SAMN07944307	Scaffold	REFSEQ	98.0152	98.9242	0.628046	China	2011	Homo sapiens	Ab5201	sputum
GCF_028177705.1	PRJNA224116	SAMN07944308	Scaffold	REFSEQ	98.0635	99.2127	0.609299	China	2011	Homo sapiens	Ab5208	sputum
GCF_028177625.1	PRJNA224116	SAMN07944309	Scaffold	REFSEQ	97.9066	99.589	0	China	2011	Homo sapiens	Ab5303	sputum
GCF_028177645.1	PRJNA224116	SAMN07944310	Scaffold	REFSEQ	97.869	98.4682	0.0684932	China	2011	Homo sapiens	Ab5317	sputum
GCF_002951015.1	PRJNA224116	SAMN07977764	Scaffold	REFSEQ	98.1106	99.5383	0.609299	USA	2011	Homo sapiens	S2	BAL
GCF_002950995.1	PRJNA224116	SAMN07977765	Scaffold	REFSEQ	98.1101	99.9813	0.609299	USA	2011	Homo sapiens	R2	BAL
GCF_002950975.1	PRJNA224116	SAMN07977766	Scaffold	REFSEQ	98.1173	99.5876	0.639584	USA	2011	Homo sapiens	S3	BAL
GCF_002951415.1	PRJNA224116	SAMN07977769	Scaffold	REFSEQ	98.0493	99.9813	0.628046	USA	2011	Homo sapiens	R4	bronch wash
GCF_002950915.1	PRJNA224116	SAMN07977771	Scaffold	REFSEQ	98.128	99.5876	0.628046	USA	2012	Homo sapiens	R5	BAL
GCF_002951335.1	PRJNA224116	SAMN07977774	Scaffold	REFSEQ	98.1081	99.5876	0.639584	USA	2010	Homo sapiens	S7	BAL
GCF_002951315.1	PRJNA224116	SAMN07977775	Scaffold	REFSEQ	98.1057	99.9813	0.609299	USA	2010	Homo sapiens	R7	bronch wash
GCF_002951235.1	PRJNA224116	SAMN07977779	Scaffold	REFSEQ	98.1239	99.9813	0.658331	USA	2011	Homo sapiens	R9	BAL
GCF_002950795.1	PRJNA224116	SAMN07977782	Scaffold	REFSEQ	98.1189	99.9813	0.609299	USA	2015	Homo sapiens	S11	BAL
GCF_002950755.1	PRJNA224116	SAMN07977783	Scaffold	REFSEQ	98.1207	99.9813	0.609299	USA	2015	Homo sapiens	R11	sputum
GCF_002950675.1	PRJNA224116	SAMN07977786	Scaffold	REFSEQ	98.1008	99.9813	0.609299	USA	2015	Homo sapiens	S13	Bronch wash
GCF_002950655.1	PRJNA224116	SAMN07977787	Scaffold	REFSEQ	98.1027	99.9813	0.609299	USA	2015	Homo sapiens	R13	sputum
GCF_002950615.1	PRJNA224116	SAMN07977788	Scaffold	REFSEQ	98.0269	99.9813	0.628046	USA	2015	Homo sapiens	S14	Bronch wash
GCF_002951175.1	PRJNA224116	SAMN07977790	Scaffold	REFSEQ	98.0514	99.9813	0.628046	USA	2008	Homo sapiens	S15	BAL
GCF_002951135.1	PRJNA224116	SAMN07977794	Scaffold	REFSEQ	98.1224	99.9813	0.609299	USA	2010	Homo sapiens	S17	SPUT
GCF_002950545.1	PRJNA224116	SAMN07977795	Scaffold	REFSEQ	98.0815	99.9813	0.706787	USA	2010	Homo sapiens	R17	SPUT
GCF_002950525.1	PRJNA224116	SAMN07977796	Scaffold	REFSEQ	98.1089	99.9813	0.628046	USA	2011	Homo sapiens	S18	BAL
GCF_002950515.1	PRJNA224116	SAMN07977797	Scaffold	REFSEQ	98.098	99.9813	0.628046	USA	2011	Homo sapiens	R18	BAL
GCF_002803655.2	PRJNA224116	SAMN08043814	Scaffold	REFSEQ	98.0662	99.1939	0.628046	Iraq	2016	Homo sapiens	ZQ1	wound swab
GCF_002838015.2	PRJNA224116	SAMN08093361	Scaffold	REFSEQ	98.008	99.6655	3.83152	Iraq	2016	Homo sapiens	ZQ2	sputum
GCF_002838025.2	PRJNA224116	SAMN08093362	Scaffold	REFSEQ	97.9271	100	0.616438	Iraq	2016	Homo sapiens	ZQ3	blood
GCF_002837945.2	PRJNA224116	SAMN08093363	Scaffold	REFSEQ	98.038	100	0.365297	Iraq	2016	Homo sapiens	ZQ4	blood
GCF_002837955.2	PRJNA224116	SAMN08093364	Scaffold	REFSEQ	97.9117	100	0.410959	Iraq	2016	Homo sapiens	ZQ5	wound swab
GCF_002838005.2	PRJNA224116	SAMN08093365	Scaffold	REFSEQ	97.9034	100	0.410959	Iraq	2016	Homo sapiens	ZQ6	wound swab
GCF_002837985.2	PRJNA224116	SAMN08093366	Scaffold	REFSEQ	98.0635	99.1939	0.628046	Iraq	2016	Homo sapiens	ZQ7	sputum
GCF_002837895.2	PRJNA224116	SAMN08093367	Scaffold	REFSEQ	97.8654	100	0	Iraq	2016	Homo sapiens	ZQ8	blood
GCF_002837885.2	PRJNA224116	SAMN08093368	Scaffold	REFSEQ	97.8372	100	0.0456621	Iraq	2016	Homo sapiens	ZQ9	blood
GCF_002837905.2	PRJNA224116	SAMN08093369	Scaffold	REFSEQ	97.8407	100	0.0456621	Iraq	2016	Homo sapiens	ZQ10	cerebrospinal fluid
GCF_003070905.1	PRJNA224116	SAMN08123204	Scaffold	REFSEQ	98.0672	100	0.136986	missing	-	-	WE1572	-
GCF_003070945.1	PRJNA224116	SAMN08123205	Scaffold	REFSEQ	98.021	100	0.747717	missing	-	-	JX101	-
GCF_003070915.1	PRJNA224116	SAMN08123206	Scaffold	REFSEQ	98.0636	100	2.05479	missing	-	-	N8	-
GCF_003130905.1	PRJNA224116	SAMN08123207	Scaffold	REFSEQ	97.9594	100	0	-	-	-	B30	-
GCF_003131005.1	PRJNA224116	SAMN08123210	Scaffold	REFSEQ	97.9714	100	1.29566	-	-	-	JX214	-
GCF_003130985.1	PRJNA224116	SAMN08123211	Scaffold	REFSEQ	97.9759	100	0.456621	-	-	-	JX111	-
GCF_003231175.1	PRJNA224116	SAMN08123212	Scaffold	REFSEQ	99.4817	100	0.410959	-	-	-	WE2714	-
GCF_003231185.1	PRJNA224116	SAMN08123213	Scaffold	REFSEQ	97.8636	100	1.20698	-	-	-	B7	-
[truncated: 21,207 more rows]
